# Supplementary material for: A Stable N‐Heterocyclic Silylene with a 1,1′‐Ferrocenediyl Backbone
Source: PubMed Central journal article supplement (PMC7898919; doi:10.1002/anie.202011691), 2020-12-01
Supplement: ANIE-60-2624-s001.pdf [file ANIE-60-2624-s001.pdf]

## Supporting Information

### **A Stable N-Heterocyclic Silylene with a 1,1'-Ferrocenediyl Backbone**

*Nadine Weyer, Myron Heinz, Julia I. Schweizer, Clemens Bruhn, Max C. Holthausen,\* and Ulrich Siemeling\**

anie\_202011691\_sm\_miscellaneous\_information.pdf

**Table of Contents**

|           |                              |     |
|-----------|------------------------------|-----|
| <b>I</b>  | <b>Experimental Section</b>  | S2  |
|           | A Compound Synthesis         | S2  |
|           | B X-Ray Crystallography      | S8  |
|           | C Plots of NMR Spectra       | S15 |
| <b>II</b> | <b>Computational Details</b> | S33 |
|           | <b>References</b>            | S69 |

## I Experimental Section

### A Compound Synthesis

#### General considerations

All reactions involving air-sensitive compounds were performed in an inert atmosphere (argon or dinitrogen) by using standard Schlenk techniques or a conventional glovebox. Starting materials were procured from standard commercial sources and used as received. A sample of high-purity ammonia-borane was kindly provided by Prof. Umit B. Demirci (University of Montpellier, France).  $[\text{SiCl}_2(\text{IPr})]$ ,<sup>[S1]</sup> **1MesLi**,<sup>[S2]</sup> and **1DippLi**,<sup>[S3]</sup> were synthesised by adapted versions of the published procedures. NMR spectra were recorded at ambient temperature with Varian NMRS-500 and MR-400 spectrometers operating at 500 and 400 MHz, respectively, for  $^1\text{H}$ . Elemental analyses were carried out with a HEKAtech Euro EA-CHNS elemental analyser at the Institute of Chemistry, University of Kassel, Germany.

#### Synthesis of **1MesSi** (NMR experiment)

$[\text{SiCl}_2(\text{IPr})]$  (10 mg, 0.02 mmol) and **1MesLi** (9 mg, 0.02 mmol) were each dissolved in  $\text{C}_6\text{D}_6$  (0.4 mL). Both solutions were frozen, then warmed carefully to a slushy state and combined in an NMR tube. After reaching room temperature, the solution was subjected to immediate NMR spectroscopic analysis.

$^1\text{H}$  NMR (500 MHz,  $\text{C}_6\text{D}_6$ ):  $\delta$  = 6.79 (s, 4H,  $\text{C}_6\text{H}_2$ ), 4.33, 3.88 (2 s,  $2 \times 4\text{H}$ ,  $\text{C}_5\text{H}_4$ ), 2.54 (s, 12H, *o*-Me), 2.10 ppm (s, 6H, *p*-Me).  $^{13}\text{C}\{^1\text{H}\}$  NMR (101 MHz,  $\text{C}_6\text{D}_6$ ):  $\delta$  = 146.2, 137.4, 130.0, 123.8 ( $4 \times \text{C}_6\text{H}_2\text{Me}_3$ ), 105.4 ( $\text{C}_{\text{ipso}} \text{C}_5\text{H}_4$ ), 68.1, 67.6 ( $2 \times \text{CH C}_5\text{H}_4$ ); 20.9, 20.3 ppm ( $2 \times \text{Me}$ ).  $^{29}\text{Si}\{^1\text{H}\}$  NMR (99 MHz,  $\text{C}_6\text{D}_6$ ):  $\delta$  = 121.5 ppm.

#### Synthesis of **1DippSi**

A suspension of  $[\text{SiCl}_2(\text{IPr})]$  (176 mg, 0.36 mmol) in toluene (4 mL) was cooled to  $-20\text{ }^\circ\text{C}$  and slowly added to a stirred solution of **1DippLi** (197 mg, 0.36 mmol) in a mixture of toluene (15 mL) and *n*-hexane (10 mL) cooled to  $-20\text{ }^\circ\text{C}$ . The cooling bath was removed and stirring continued for 4 h. Diethyl ether (3 mL) and zinc chloride (49 mg, 0.36 mmol) were added and stirring was continued for 12 h. Volatile components were removed under reduced pressure. The residue was extracted with *n*-hexane ( $3 \times 15\text{ mL}$ ). The extracts were combined and their volume reduced to ca. 5 mL under reduced pressure, which afforded the product as a

yellow crystalline solid. A second crop was obtained by reducing the volume of the mother liquor to ca. 2 mL under reduced pressure. Yield 87 mg (43 %).

$C_{34}H_{42}N_2FeSi$  (562.64): calcd. C 72.58, H 7.52, N 4.98 %; found C 71.96, H 7.62, N 4.73 %.

$^1H$  NMR (500 MHz,  $C_6D_6$ ):  $\delta$  = 7.14 – 7.09 (m, 6H,  $C_6H_3$ ), 4.48 (s, 4H,  $C_5H_4$ ), 4.04 (sept,  $^3J_{HH} = 6.9$  Hz, 4H,  $CHMe_2$ ), 3.90 (s, 4H,  $C_5H_4$ ), 1.41, 1.32 ppm (2 d,  $^3J_{HH} = 6.9$  Hz,  $2 \times 12H$ ,  $CHMe_2$ ).  $^{13}C\{^1H\}$  NMR (101 MHz,  $C_6D_6$ ):  $\delta$  = 148.6 ( $CCHMe_2$ ), 140.8 ( $C_{ipso}$  Dipp), 128.0, 124.5 ( $2 \times CH$  Dipp), 106.6 ( $C_{ipso}$   $C_5H_4$ ), 67.9, 67.8 ( $2 \times CH$   $C_5H_4$ ), 28.8 ( $CHMe_2$ ), 25.9, 24.3 ppm ( $2 \times CHMe_2$ ).  $^{29}Si\{^1H\}$  NMR (99 MHz,  $C_6D_6$ ):  $\delta$  = 115.7 ppm.

### Synthesis of **1MesSi(SePh)<sub>2</sub>**

$[SiCl_2(IPr)]$  (24 mg, 0.05 mmol) and **1MesLi<sub>2</sub>** (23 mg, 0.05 mmol) were each dissolved in benzene (5 mL). Both solutions were frozen, then warmed carefully to a slushy state and combined. After reaching room temperature, a solution of diphenyl diselenide (16 mg, 0.05 mmol) in benzene (2 mL) was added to the stirred mixture. After 1 h volatile components were removed under reduced pressure. The residue was extracted with *n*-hexane ( $3 \times 5$  mL) and the combined extract filtered through a short Celite pad. The filtrate was reduced to dryness under reduced pressure. IPr and trace amounts of **1MesH<sub>2</sub>** were removed from the dark yellow residue by sublimation (dynamic vacuum, final bath temperature 110 °C). Yield 27 mg (68 %).

$C_{40}H_{40}N_2FeSe_2Si$  (790.61): calcd. C 60.77, H 5.10, N 3.54 %; found C 60.99, H 5.14, N 3.43 %.

$^1H$  NMR (500 MHz,  $C_6D_6$ ):  $\delta$  = 7.35 (m, 4H, Ph), 6.86 (m, 2H, Ph), 6.67 (m, 4H, Ph), 6.70 (s, 4H,  $C_6H_2$ ), 4.62, 3.88 (2 s,  $2 \times 4H$ ,  $C_5H_4$ ), 2.60 (s, 12H, *o*-Me); 2.09 ppm (s, 6H, *p*-Me).

$^{13}C\{^1H\}$  NMR (101 MHz,  $C_6D_6$ ):  $\delta$  = 142.6, 138.4, 135.9 ( $3 \times C_{ipso}$  Mes), 134.7 (CH Ph), 130.3 (CH Mes), 128.6 ( $C_{ipso}$  Ph), 128.4, 126.8 ( $2 \times CH$  Ph), 99.5 ( $C_{ipso}$   $C_5H_4$ ), 69.4, 68.0 ( $2 \times CH$   $C_5H_4$ ), 21.7 (*o*-Me), 20.8 ppm (*p*-Me).  $^{29}Si\{^1H\}$  NMR (99 MHz,  $C_6D_6$ ):  $\delta$  = -27.5 ppm.

$^{77}Se\{^1H\}$  NMR (95 MHz,  $C_6D_6$ ):  $\delta$  = 143.0 ppm.

### Synthesis of **1DippSi(SePh)<sub>2</sub>**

$C_6D_6$  (0.7 mL) was added to **1DippSi** (34 mg, 0.06 mmol) and diphenyl diselenide (20 mg, 0.06 mmol) in an NMR tube. After 12 h the solution was subjected to NMR spectroscopic analysis, which revealed essentially quantitative reaction. Slow evaporation of the solvent afforded the product as a yellow crystalline solid. Trace amounts of residual diphenyl

diselenide were removed by sublimation (dynamic vacuum, final bath temperature 110 °C). Yield 26 mg (50 %).

$C_{46}H_{52}N_2FeSe_2Si$  (874.77): calcd. C 63.16, H 5.99, N 3.20 %; found C 63.20, H 6.14, N 2.99 %.

$^1H$  NMR (500 MHz,  $C_6D_6$ ):  $\delta$  = 7.19 (s, 6H,  $C_6H_3$ ), 6.95 (m, 4H, Ph), 6.81 (m, 2H, Ph), 6.72 (m, 4H, Ph), 4.73 (s, 4H,  $C_5H_4$ ), 4.18 (sept,  $^3J_{HH}$  = 6.6 Hz, 4H,  $CHMe_2$ ), 3.89 (s, 4H,  $C_5H_4$ ), 1.48, 1.26 ppm (2 d,  $^3J_{HH}$  = 6.6 Hz,  $2 \times 12H$ ,  $CHMe_2$ ).  $^{13}C\{^1H\}$  NMR (101 MHz,  $C_6D_6$ ):  $\delta$  = 149.1 ( $CCHMe_2$ ), 142.6 ( $C_{ipso}$  Dipp), 135.6 (CH Ph), 131.7 ( $C_{ipso}$  Ph), 128.7 (CH Ph), 127.9 (CH Dipp), 126.8 (CH Ph), 125.7 (CH Dipp), 101.3 ( $C_{ipso}$   $C_5H_4$ ), 69.5, 68.2 ( $2 \times CH$   $C_5H_4$ ), 29.1 ( $CHMe_2$ ), 27.4, 25.5 ppm ( $2 \times CHMe_2$ ).  $^{29}Si\{^1H\}$  NMR (99 MHz,  $C_6D_6$ ):  $\delta$  = -29.0 ppm.  $^{77}Se\{^1H\}$  NMR (95 MHz,  $C_6D_6$ ):  $\delta$  = 149.3 ppm.

### Synthesis of $(1DippSiO_2)_2C$

The reaction was performed in an NMR tube sealed to a ground-glass joint. A solution of **1DippSi** (11 mg, 0.02 mmol) in  $C_6D_6$  (0.8 mL) was frozen with liquid dinitrogen and the NMR tube evacuated. Carbon dioxide (1.7 mL, 0.07 mmol) was introduced and the solution warmed to ambient temperature. Slow evaporation of the solvent afforded the product as a pale yellow crystalline solid. Yield 6 mg (51 %).

$C_{69}H_{84}N_4Fe_2O_4Si_2$  (1201.29): calcd. C 68.99, H 7.05, N 4.66 %; found C 68.37, H 7.06, N 4.23 %.

$^1H$  NMR (500 MHz,  $C_6D_6$ ):  $\delta$  = 7.11 (m, 4H,  $C_6H_3$ ), 7.05 (m, 8H,  $C_6H_3$ ), 4.33, 3.70 (2 s,  $2 \times 8H$ ,  $C_5H_4$ ), 3.70 (sept,  $^3J_{HH}$  = 6.7 Hz, 8H,  $CHMe_2$ ), 1.25, 1.12 ppm (2 d,  $^3J_{HH}$  = 6.7 Hz,  $2 \times 24H$ ,  $CHMe_2$ ).  $^{13}C\{^1H\}$  NMR (101 MHz,  $C_6D_6$ ):  $\delta$  = 147.8 ( $CCHMe_2$ ), 139.5 ( $C_{ipso}$  Dipp), 128.4 (CH Dipp), 127.6 ( $CO_4$ ), 125.1 (CH Dipp), 100.4 ( $C_{ipso}$   $C_5H_4$ ), 68.2, 68.1 ( $2 \times CH$   $C_5H_4$ ), 28.7 ( $CHMe_2$ ), 26.0, 25.3 ppm ( $2 \times CHMe_2$ ).  $^{29}Si\{^1H\}$  NMR (99 MHz,  $C_6D_6$ ):  $\delta$  = -57.9 ppm.

### Synthesis of $(1DippSiO)_2$

The reaction was performed in an NMR tube sealed to a ground-glass joint. A solution of **1DippSi** (11 mg, 0.02 mmol) in  $C_6D_6$  (0.8 mL) was frozen with liquid dinitrogen and the NMR tube evacuated. Nitrous oxide (1.7 mL, 0.07 mmol) was introduced and the solution warmed to ambient temperature. Slow evaporation of the solvent afforded the product as a pale yellow crystalline solid. Yield 6 mg (53 %).

$C_{68}H_{84}N_4Fe_2O_2Si_2$  (1157.28): calcd. C 70.57, H 7.31, N 4.84 %; found C 70.67, H 7.32, N 4.61 %.

$^1H$  NMR (500 MHz,  $C_6D_6$ ):  $\delta$  = 7.14 (m, 4H,  $C_6H_3$ ), 7.01 (m, 4H,  $C_6H_3$ ), 6.84 (m, 4H,  $C_6H_3$ ), 4.32 (s, 4H,  $C_5H_4$ ), 4.23 (sept,  $^3J_{HH} = 6.6$  Hz, 4H,  $CHMe_2$ ), 3.77, 3.65, 3.53 (3 s,  $3 \times 4H$ ,  $C_5H_4$ ), 3.16 (sept,  $^3J_{HH} = 6.7$  Hz, 4H,  $CHMe_2$ ), 1.80, (d,  $^3J_{HH} = 6.6$  Hz, 12H,  $CHMe_2$ ), 1.55 (d,  $^3J_{HH} = 6.7$  Hz, 12H,  $CHMe_2$ ), 0.64 (d,  $^3J_{HH} = 6.6$  Hz, 12H,  $CHMe_2$ ), 0.34 ppm (d,  $^3J_{HH} = 6.7$  Hz, 12H,  $CHMe_2$ ).  $^{13}C\{^1H\}$  NMR (101 MHz,  $C_6D_6$ ):  $\delta$  = 148.4, 145.8 ( $2 \times CCHMe_2$ ), 145.2 ( $C_{ipso}$  Dipp), 128.4, 127.2, 126.8, 125.5 ( $4 \times CH$  Dipp), 108.0 ( $C_{ipso}$   $C_5H_4$ ), 71.3, 68.0, 67.6, 64.5 ( $4 \times CH$   $C_5H_4$ ), 29.2, 29.0 ( $2 \times CHMe_2$ ), 27.2 (two closely spaced signals), 26.2, 25.4 ppm ( $4 \times CHMe_2$ ).  $^{29}Si\{^1H\}$  NMR (99 MHz,  $C_6D_6$ ):  $\delta$  = -58.6 ppm.

### Synthesis of **1DippSi(H)OH**

The product is formed when benzene solutions of **1DippSi** are exposed to an inert gas atmosphere containing trace amounts of water, which may happen simply by serendipity. The following procedure, which was originally intended to be used for the reaction of the silylene with carbon suboxide, was found to afford the water addition product conveniently in reproducible yields. A 100 mL flask was charged with a mixture of malonic acid (150 mg, 1.44 mmol) and phosphorus pentoxide (1.50 g, 5.3 mmol) and connected with a glass elbow to an empty 100 mL Schlenk flask. The apparatus was connected to the Schlenk line and evacuated for ca. 20 min. The reaction flask was subsequently immersed in a heating bath kept at 140 °C for ca. 10 min under static vacuum. The resulting gaseous products were collected by condensation into the Schlenk flask cooled with liquid dinitrogen. This flask was disconnected from the reaction flask and the liquid dinitrogen bath replaced by an ethanol/liquid dinitrogen cooling bath (-110 °C), which was allowed to warm up to ambient temperature over the course of 4 h under ambient pressure (i. e. stopcock valve open to the Schlenk line). It was subsequently connected with a glass elbow to a 100 mL Schlenk flask containing a frozen solution of **1DippSi** (28 mg, 0.05 mmol) in toluene (7 mL), which was immersed in a liquid dinitrogen bath after closing the stopcock valve. The bath was removed and the apparatus allowed to warm up to ambient temperature under ambient pressure (i. e. stopcock valve open to the Schlenk line). The two flasks were disconnected. The solvent was removed under reduced pressure and the residue taken up in benzene. Slow evaporation of the solvent afforded the product as a yellow crystalline solid. Yield 18 mg (62 %).

$C_{34}H_{44}N_2FeOSi$  (580.66): calcd. C 70.33, H 7.64, N 4.82 %; found C 70.22, H 7.44, N 4.40 %.

$^1\text{H}$  NMR (500 MHz,  $\text{C}_6\text{D}_6$ ):  $\delta$  = 7.10 (m, 6H,  $\text{C}_6\text{H}_3$ ), 5.27 (s, 1H, SiH); 4.58, 4.52 (2 s,  $2 \times 2\text{H}$ ,  $\text{C}_5\text{H}_4$ ), 4.13, 4.03 (2 sept,  $^3J_{\text{HH}} = 6.8$  Hz,  $2 \times 2\text{H}$ ,  $\text{CHMe}_2$ ), 3.90 (s, 4H,  $\text{C}_5\text{H}_4$ ), 1.56 (s, 1H, OH), 1.39, 1.30 ppm (2 m,  $2 \times 12\text{H}$ , m,  $\text{CHMe}_2$ ).  $^{13}\text{C}\{^1\text{H}\}$  NMR (101 MHz,  $\text{C}_6\text{D}_6$ ):  $\delta$  = 149.8, 148.7 ( $2 \times \text{CCHMe}_2$ ), 140.7 ( $\text{C}_{\text{ipso}}$  Dipp), 127.5, 124.9, 124.7 ( $3 \times \text{CH}$  Dipp), 101.4 ( $\text{C}_{\text{ipso}}$   $\text{C}_5\text{H}_4$ ), 69.9, 68.0, 67.8, 67.5 ( $4 \times \text{CH}$   $\text{C}_5\text{H}_4$ ), 28.6, 28.4, 25.9, 25.8 ( $4 \times \text{CHMe}_2$ ), 25.4 ppm (two closely spaced signals,  $2 \times \text{CHMe}_2$ ).  $^{29}\text{Si}\{^1\text{H}\}$  NMR (99 MHz,  $\text{C}_6\text{D}_6$ ):  $\delta$  =  $-45.7$  ppm.

### Synthesis of **1DippSi(H)NH<sub>2</sub>**

The reaction was performed in an NMR tube sealed to a ground-glass joint. A solution of **1DippSi** (17 mg, 0.03 mmol) in  $\text{C}_6\text{D}_6$  (0.8 mL) was frozen with liquid dinitrogen and the NMR tube evacuated. Ammonia (1.0 mL, 0.04 mmol) was introduced and the solution warmed to ambient temperature. Slow evaporation of the solvent afforded the product as a yellow crystalline solid. Yield 12 mg (69 %).

$\text{C}_{34}\text{H}_{45}\text{N}_3\text{FeSi}$  (579.67): calcd. C 70.45, H 7.83, N 7.25 %; found C 70.33, H 7.95, N 7.01 %.

$^1\text{H}$  NMR (500 MHz,  $\text{C}_6\text{D}_6$ ):  $\delta$  = 7.13 (m, 6H,  $\text{C}_6\text{H}_3$ ), 5.76 (t,  $^3J_{\text{HH}} = 3.5$  Hz, 1H, SiH), 4.58, 4.49 (2 s,  $2 \times 2\text{H}$ ,  $\text{C}_5\text{H}_4$ ), 4.12, 4.05 (2 sept,  $^3J_{\text{HH}} = 6.9$  Hz,  $2 \times 2\text{H}$ ,  $\text{CHMe}_2$ ), 3.92, 3.90 (2 s,  $2 \times 2\text{H}$ ,  $\text{C}_5\text{H}_4$ ), 1.38, 1.35, 1.34, 1.27 (4 d,  $^3J_{\text{HH}} = 6.9$  Hz,  $4 \times 6\text{H}$ ,  $\text{CHMe}_2$ ), 0.37 ppm (br. s, 2H,  $\text{NH}_2$ ).  $^{13}\text{C}\{^1\text{H}\}$  NMR (101 MHz,  $\text{C}_6\text{D}_6$ ):  $\delta$  = 148.9, 148.7 ( $2 \times \text{CCHMe}_2$ ), 142.6 ( $\text{C}_{\text{ipso}}$  Dipp), 128.6, 127.1, 125.0, 124.5 ( $4 \times \text{CH}$  Dipp), 101.0 ( $\text{C}_{\text{ipso}}$   $\text{C}_5\text{H}_4$ ), 71.0, 67.8, 67.4, 66.3 ( $4 \times \text{CH}$   $\text{C}_5\text{H}_4$ ), 28.8, 28.1 ( $2 \times \text{CHMe}_2$ ), 26.1, 26.0, 25.9, 25.0 ppm ( $4 \times \text{CHMe}_2$ ).  $^{29}\text{Si}\{^1\text{H}\}$  NMR (99 MHz,  $\text{C}_6\text{D}_6$ ):  $\delta$  =  $-42.4$  ppm.

### Synthesis of **1DippSi(H)(PHFc)**

A suspension of ferrocenylphosphine (11 mg, 0.05 mmol) in *n*-hexane (4 mL) was added to a stirred solution of **1DippSi** (28 mg, 0.05 mmol) in toluene (4 mL). After 12 h volatile components were removed under reduced pressure. The residue was taken up in a minimal amount of benzene. Slow evaporation of the solvent afforded the product as a yellow crystalline solid. Yield 27 mg (69 %).

$\text{C}_{44}\text{H}_{53}\text{N}_2\text{Fe}_2\text{PSi}$  (780.66): calcd. C 67.70, H 6.84, N 3.59 %; found C 67.14, H 6.94, N 3.66 %.

$^1\text{H}$  NMR (500 MHz,  $\text{C}_6\text{D}_6$ ):  $\delta$  = 7.24 (m, 1H,  $\text{C}_6\text{H}_3$ ), 7.15, 7.11 (2 m,  $2 \times 2\text{H}$ ,  $\text{C}_6\text{H}_3$ ), 6.98 (m, 1H,  $\text{C}_6\text{H}_3$ ), 6.49 (d,  $^2J_{\text{PH}} = 11.9$  Hz, 1H, SiH); 4.65 (s, 2H,  $\text{C}_5\text{H}_4$ ), 4.60, 4.57 (2 m,  $2 \times 1\text{H}$ ,  $\text{C}_5\text{H}_4$ ), 4.28, 4.20, 4.04 (3 sept,  $^3J_{\text{HH}} = 6.7$  Hz,  $3 \times 1\text{H}$ ,  $\text{CHMe}_2$ ), 3.90 (m, 6H,  $\text{C}_5\text{H}_4$ ), 3.80 (s,

1H, C<sub>5</sub>H<sub>4</sub>), 3.74 (sept, <sup>3</sup>J<sub>HH</sub> = 6.7 Hz, 1H, CHMe<sub>2</sub>), 3.70 (s, 5H, Cp), 3.08 (s, 1H, C<sub>5</sub>H<sub>4</sub>), 2.80 (d, <sup>1</sup>J<sub>PH</sub> = 210.0 Hz, 1H, PH), 1.81, 1.70, 1.49, 1.44, 1.42, 1.22, 1.08, 0.94 ppm (8 d, <sup>3</sup>J<sub>HH</sub> = 6.7 Hz, 8 × 3H, CHMe<sub>2</sub>). <sup>13</sup>C{<sup>1</sup>H} NMR (101 MHz, C<sub>6</sub>D<sub>6</sub>): δ = 149.8, 149.3, 148.9, 148.6 (4 × CCHMe<sub>2</sub>), 142.6, 141.7 (2 × C<sub>ipso</sub> Dipp), 127.6, 127.3, 125.4, 125.1, 124.9, 124.6 (6 × CH Dipp), 102.5, 102.4 (2 × C<sub>ipso</sub> C<sub>5</sub>H<sub>4</sub>), 75.7 (d, J<sub>PC</sub> = 34.7 Hz, CH C<sub>5</sub>H<sub>4</sub>), 74.0 (d, J<sub>PC</sub> = 9.4 Hz, CH C<sub>5</sub>H<sub>4</sub>), 72.0, 71.4 (2 × CH C<sub>5</sub>H<sub>4</sub>), 70.7 (d, J<sub>PC</sub> = 8.2 Hz, CH C<sub>5</sub>H<sub>4</sub>), 70.0 (CH, C<sub>5</sub>H<sub>4</sub>), 69.6 (Cp), 67.8 (d, J<sub>PC</sub> = 13.5 Hz, CH C<sub>5</sub>H<sub>4</sub>), 67.3 (d, J<sub>PC</sub> = 8.2 Hz, CH C<sub>5</sub>H<sub>4</sub>), 66.5 (d, J<sub>PC</sub> = 10.8 Hz, C<sub>ipso</sub> Fc), 65.7, 65.1 (2 × CH C<sub>5</sub>H<sub>4</sub>), 28.9 (two closely spaced signals), 28.3 (3 × CHMe<sub>2</sub>), 28.5 (d, J<sub>PC</sub> = 3.1 Hz, CHMe<sub>2</sub>), 27.1, 26.6, 26.2, 25.5 (two closely spaced signals), 24.7 (6 × CHMe<sub>2</sub>), 26.4 ppm (d, J<sub>PC</sub> = 9.4 Hz, CHMe<sub>2</sub>), 25.6 (d, J<sub>PC</sub> = 10.9 Hz, CHMe<sub>2</sub>). <sup>29</sup>Si NMR (99 MHz, C<sub>6</sub>D<sub>6</sub>): δ = -18.6 ppm (ddd, <sup>1</sup>J<sub>SiH</sub> = 235 Hz, <sup>1</sup>J<sub>Psi</sub> = 11 Hz, <sup>2</sup>J<sub>SiH</sub> = 5 Hz). <sup>31</sup>P{<sup>1</sup>H} NMR (202 MHz, C<sub>6</sub>D<sub>6</sub>): δ = -159.2 ppm.

### Synthesis of **1DippSi(H)(BH<sub>2</sub>NH<sub>3</sub>)**

Ammonia-borane (1.2 mg, 0.04 mmol) was added to a solution of **1DippSi** (21.9 mg, 0.039 mmol) in toluene (5 mL). The mixture was stirred for 12 h. Volatile components were removed under reduced pressure. The residue was taken up in benzene (1 mL). Slow evaporation of the solvent afforded the product as a pale yellow crystalline solid. Yield 12.7 mg (55 %).

C<sub>34</sub>H<sub>48</sub>N<sub>3</sub>BFeSi (593.51): calcd. C 68.81, H 8.15, N 7.08 %; found C 68.86, H 8.33, N 6.24 %.

<sup>1</sup>H NMR (500 MHz, C<sub>6</sub>D<sub>6</sub>): δ = 7.12, 7.06, 7.00 (3 m, 3 × 2H, C<sub>6</sub>H<sub>3</sub>), 6.28 (br. s, 1H, SiH), 4.83, 4.63 (2 s, 2 × 2H, C<sub>5</sub>H<sub>4</sub>), 4.37, 4.24 (2 sept, <sup>3</sup>J<sub>HH</sub> = 6.8 Hz, 2 × 2H, CHMe<sub>2</sub>), 4.03, 3.95 (2 m, 2 × 2H, C<sub>5</sub>H<sub>4</sub>), 1.55, 1.45, 1.32, 1.23 (4 d, <sup>3</sup>J<sub>HH</sub> = 6.8 Hz, 4 × 6H, CHMe<sub>2</sub>), 0.89 ppm (t, <sup>3</sup>J<sub>HH</sub> = 7.0 Hz, 3H, NH<sub>3</sub>). <sup>13</sup>C{<sup>1</sup>H} NMR (101 MHz, C<sub>6</sub>D<sub>6</sub>): δ = 149.5, 148.9 (2 × CCHMe<sub>2</sub>), 144.7 (C<sub>ipso</sub> Dipp), 125.9, 124.1, 123.9 (3 × CH Dipp), 105.2 (C<sub>ipso</sub> C<sub>5</sub>H<sub>4</sub>), 71.5, 66.9, 65.9, 64.8 (4 × CH C<sub>5</sub>H<sub>4</sub>), 28.2, 27.6 (2 × CHMe<sub>2</sub>), 26.4, 25.6, 25.3, 25.2 ppm (4 × CHMe<sub>2</sub>).

<sup>11</sup>B{<sup>1</sup>H} NMR (160 MHz): δ = -23.2 ppm. Signals due to boron-bonded Si and H atoms could not be detected, as has been noted before for related compounds such as, for example, (Me<sub>3</sub>Si)<sub>3</sub>SiBH<sub>2</sub>NEt<sub>3</sub>.<sup>[S4]</sup>



## **B X-Ray Crystallography**

For each data collection a single crystal was mounted on a micro-mount and all geometric and intensity data were taken from this sample. Data collections were carried out at 100(2) K using MoK $\alpha$  radiation ( $\lambda = 0.71073 \text{ \AA}$ ) either on a Stoe IPDS2 diffractometer equipped with a 2-circle goniometer and an area detector, or on a Stoe StadiVari diffractometer equipped with a 4-circle goniometer and a DECTRIS Pilatus 200K detector. The data sets were corrected for absorption, Lorentz and polarisation effects. The structures were solved by direct methods (SHELXT) and refined using alternating cycles of least-squares refinements against  $F^2$  (SHELXL2014/7).<sup>[S5]</sup> C-bonded H atoms were included to the models in calculated positions, heteroatom-bonded H atoms have been found in the difference Fourier lists. All H atoms were treated with the 1.2 fold or 1.5 fold isotropic displacement parameter of their bonding partner. Experimental details for each diffraction experiment are given in Table S1. CCDC 2025512 – 2025520 contain the supplementary crystallographic data for this paper. These data are provided free of charge by The Cambridge Crystallographic Data Centre.

Table S1. X-ray crystallographic details.

|                                                                                        | <b>1DippSi-C<sub>6</sub>H<sub>6</sub></b>           | <b>1DippSi(H)OH</b>                                                | <b>1DippSi(H)NH<sub>2</sub>-C<sub>6</sub>H<sub>6</sub></b> | <b>1DippSi(H)PHFc</b>                                              | <b>1DippSi(H)(BH<sub>2</sub>NH<sub>3</sub>)-C<sub>6</sub>H<sub>6</sub></b> | <b>1Messi(SePh)<sub>2</sub></b>                                     | <b>1DippSi(SePh)<sub>2</sub>-½C<sub>6</sub>H<sub>6</sub></b>        | <b>(1DippSiO)<sub>2</sub>-3C<sub>6</sub>H<sub>6</sub></b>                                      | <b>(1DippSiO<sub>2</sub>)<sub>2</sub>C-2C<sub>6</sub>H<sub>6</sub></b>                        |
|----------------------------------------------------------------------------------------|-----------------------------------------------------|--------------------------------------------------------------------|------------------------------------------------------------|--------------------------------------------------------------------|----------------------------------------------------------------------------|---------------------------------------------------------------------|---------------------------------------------------------------------|------------------------------------------------------------------------------------------------|-----------------------------------------------------------------------------------------------|
| Chemical formula                                                                       | C <sub>40</sub> H <sub>48</sub> FeN <sub>2</sub> Si | C <sub>34</sub> H <sub>44</sub> FeN <sub>2</sub> O <sub>2</sub> Si | C <sub>40</sub> H <sub>51</sub> FeN <sub>3</sub> Si        | C <sub>44</sub> H <sub>53</sub> Fe <sub>2</sub> N <sub>2</sub> PSi | C <sub>40</sub> H <sub>54</sub> BFeN <sub>3</sub> Si                       | C <sub>40</sub> H <sub>40</sub> FeN <sub>2</sub> Se <sub>2</sub> Si | C <sub>49</sub> H <sub>55</sub> FeN <sub>2</sub> Se <sub>2</sub> Si | C <sub>86</sub> H <sub>102</sub> Fe <sub>2</sub> N <sub>4</sub> O <sub>2</sub> Si <sub>2</sub> | C <sub>81</sub> H <sub>96</sub> Fe <sub>2</sub> N <sub>4</sub> O <sub>4</sub> Si <sub>2</sub> |
| Formula mass                                                                           | 640.74                                              | 580.65                                                             | 657.77                                                     | 780.64                                                             | 671.61                                                                     | 790.60                                                              | 913.81                                                              | 1391.59                                                                                        | 1357.49                                                                                       |
| Crystal system                                                                         | triclinic                                           | monoclinic                                                         | triclinic                                                  | orthorhombic                                                       | monoclinic                                                                 | monoclinic                                                          | monoclinic                                                          | monoclinic                                                                                     | monoclinic                                                                                    |
| Space group                                                                            | <i>P</i> -1                                         | <i>P</i> 2 <sub>1</sub> / <i>n</i>                                 | <i>P</i> -1                                                | <i>P</i> 2 <sub>1</sub> 2 <sub>1</sub> 2 <sub>1</sub>              | <i>P</i> 2 <sub>1</sub> / <i>n</i>                                         | <i>P</i> 2 <sub>1</sub> / <i>c</i>                                  | <i>P</i> 2 <sub>1</sub> / <i>n</i>                                  | <i>C</i> 2/ <i>c</i>                                                                           | <i>P</i> 2 <sub>1</sub> / <i>n</i>                                                            |
| <i>a</i> /Å                                                                            | 9.6664(3)                                           | 14.7950(5)                                                         | 9.9324(7)                                                  | 21.6987(6)                                                         | 9.8394(2)                                                                  | 11.0243(4)                                                          | 17.9177(10)                                                         | 18.6690(9)                                                                                     | 15.3561(7)                                                                                    |
| <i>b</i> /Å                                                                            | 9.8648(3)                                           | 9.9505(4)                                                          | 11.8878(8)                                                 | 10.6299(3)                                                         | 29.5924(7)                                                                 | 8.4164(2)                                                           | 11.7160(5)                                                          | 20.9176(8)                                                                                     | 19.8360(12)                                                                                   |
| <i>c</i> /Å                                                                            | 19.0474(6)                                          | 20.9936(7)                                                         | 15.0050(8)                                                 | 16.7015(6)                                                         | 12.7890(3)                                                                 | 37.7848(14)                                                         | 21.8288(13)                                                         | 18.4822(9)                                                                                     | 23.5810(12)                                                                                   |
| $\alpha$ /°                                                                            | 97.704(2)                                           | 90                                                                 | 93.880(5)                                                  | 90                                                                 | 90                                                                         | 90                                                                  | 90                                                                  | 90                                                                                             | 90                                                                                            |
| $\beta$ /°                                                                             | 103.986(2)                                          | 106.856(2)                                                         | 96.851(5)                                                  | 90                                                                 | 103.655(2)                                                                 | 97.041(3)                                                           | 114.131(4)                                                          | 96.024(4)                                                                                      | 101.838(4)                                                                                    |
| $\gamma$ /°                                                                            | 99.817(2)                                           | 90                                                                 | 99.294(5)                                                  | 90                                                                 | 90                                                                         | 90                                                                  | 90                                                                  | 90                                                                                             | 90                                                                                            |
| <i>U</i> /Å <sup>3</sup>                                                               | 1707.23(9)                                          | 2957.8(2)                                                          | 1729.1(2)                                                  | 3852.3(2)                                                          | 3618.54(14)                                                                | 3479.4(2)                                                           | 4181.9(4)                                                           | 7177.6(6)                                                                                      | 7030.1(6)                                                                                     |
| <i>Z</i>                                                                               | 2                                                   | 4                                                                  | 2                                                          | 4                                                                  | 4                                                                          | 4                                                                   | 4                                                                   | 4                                                                                              | 4                                                                                             |
| $\mu$ /mm <sup>-1</sup>                                                                | 4.094                                               | 0.580                                                              | 0.503                                                      | 0.860                                                              | 0.482                                                                      | 2.592                                                               | 2.167                                                               | 0.490                                                                                          | 4.051                                                                                         |
| <i>F</i> (000)                                                                         | 684                                                 | 1240                                                               | 704                                                        | 1648                                                               | 1440                                                                       | 1608                                                                | 1884                                                                | 2968                                                                                           | 2888                                                                                          |
| Crystal size/mm <sup>3</sup>                                                           | 0.29 × 0.22 × 0.15                                  | 0.18 × 0.15 × 0.01                                                 | 0.53 × 0.32 × 0.21                                         | 0.13 × 0.06 × 0.05                                                 | 0.26 × 0.22 × 0.21                                                         | 0.28 × 0.16 × 0.05                                                  | 0.22 × 0.21 × 0.06                                                  | 0.17 × 0.15 × 0.04                                                                             | 0.17 × 0.08 × 0.06                                                                            |
| Absorption correction                                                                  | multi-scan                                          | integration                                                        | integration                                                | multi-scan                                                         | multi-scan                                                                 | integration                                                         | integration                                                         | integration                                                                                    | integration                                                                                   |
| <i>T</i> <sub>min</sub> / <i>T</i> <sub>max</sub>                                      | 0.2341/0.5229                                       | 0.9224/0.9927                                                      | 0.7670/0.9100                                              | 0.8034/0.9583                                                      | 0.5818/0.8771                                                              | 0.6331/0.8916                                                       | 0.6049/0.6882                                                       | 0.9167/0.9814                                                                                  | 0.6193/0.8100                                                                                 |
| $\theta$ range/°                                                                       | 4.628 – 70.974                                      | 1.500 – 25.661                                                     | 1.743 – 25.993                                             | 1.539 – 25.989                                                     | 1.777 – 26.000                                                             | 1.861 – 25.499                                                      | 1.247 – 25.500                                                      | 1.767 – 26.999                                                                                 | 2.938 – 68.496                                                                                |
| Reflections measured                                                                   | 13805                                               | 13419                                                              | 11494                                                      | 12751                                                              | 27029                                                                      | 15636                                                               | 28744                                                               | 15666                                                                                          | 29515                                                                                         |
| Independent reflections                                                                | 6303                                                | 5557                                                               | 6740                                                       | 7550                                                               | 7107                                                                       | 6462                                                                | 7778                                                                | 7722                                                                                           | 12559                                                                                         |
| [ <i>R</i> <sub>int</sub> ]                                                            | [0.0151]                                            | [0.0201]                                                           | [0.0488]                                                   | [0.0550]                                                           | [0.0175]                                                                   | [0.0450]                                                            | [0.0272]                                                            | [0.0468]                                                                                       | [0.0702]                                                                                      |
| Parameters                                                                             | 405                                                 | 366                                                                | 417                                                        | 465                                                                | 427                                                                        | 431                                                                 | 504                                                                 | 443                                                                                            | 854                                                                                           |
| Final <i>R</i> <sub>1</sub> ( <i>wR</i> <sub>2</sub> )<br>[ <i>I</i> > 2σ( <i>I</i> )] | 0.0295 (0.0785)                                     | 0.0330 (0.0788)                                                    | 0.0625 (0.1600)                                            | 0.0538 (0.1152)                                                    | 0.0338 (0.0850)                                                            | 0.0516 (0.1328)                                                     | 0.0282 (0.0730)                                                     | 0.0423 (0.0967)                                                                                | 0.0797 (0.2080)                                                                               |
| Final <i>R</i> <sub>1</sub> ( <i>wR</i> <sub>2</sub> )<br>[all data]                   | 0.0309 (0.0796)                                     | 0.0404 (0.0876)                                                    | 0.0800 (0.1725)                                            | 0.0843 (0.1561)                                                    | 0.0404 (0.0919)                                                            | 0.0620 (0.1408)                                                     | 0.0345 (0.0782)                                                     | 0.0676 (0.1093)                                                                                | 0.1142 (0.2475)                                                                               |
| Goodness of fit                                                                        | 1.052                                               | 1.046                                                              | 1.074                                                      | 1.116                                                              | 1.061                                                                      | 1.042                                                               | 0.818                                                               | 1.010                                                                                          | 1.064                                                                                         |
| Residual electron<br>density/eÅ <sup>-3</sup>                                          | -0.530 – 0.260                                      | -0.303 – 0.801                                                     | -0.826 – 1.506                                             | -1.347 – 1.140                                                     | -0.313 – 0.497                                                             | -0.668 – 1.959                                                      | -0.335 – 0.492                                                      | -0.497 – 0.433                                                                                 | -0.927 – 0.877                                                                                |
| CCDC No.                                                                               | 2025512                                             | 2025513                                                            | 2025514                                                    | 2025515                                                            | 2025516                                                                    | 2025517                                                             | 2025518                                                             | 2025519                                                                                        | 2025520                                                                                       |

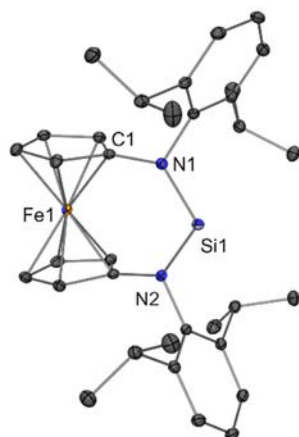

**Figure S1.** Molecular structure of **1DippSi** (ORTEP plot, 30 % ellipsoids) in the crystal. Hydrogen atoms have been omitted for clarity. Selected bond lengths [ $\text{\AA}$ ] and angles [ $^\circ$ ]: Si1–N1 1.7327(12), Si1–N2 1.7344(12), N1–Si1–N2 106.58(6); sum of angles ( $\Sigma\alpha$ ) at N1 359.9, at N2 360.0

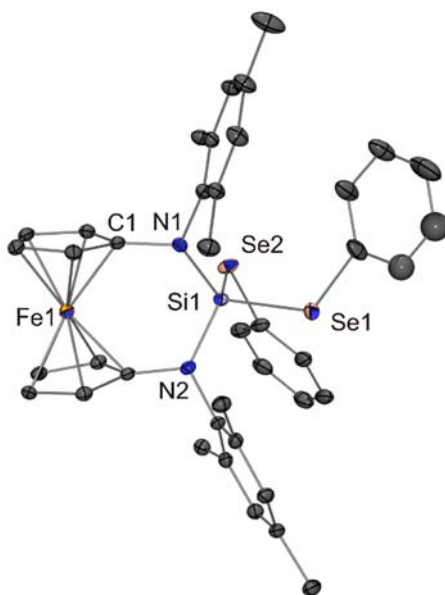

**Figure S2.** Molecular structure of **1MesSi(SePh)<sub>2</sub>** (ORTEP plot, 30 % ellipsoids) in the crystal. Hydrogen atoms have been omitted for clarity. Selected bond lengths [ $\text{\AA}$ ] and angles [ $^\circ$ ]: Si1–N1 1.736(3), Si1–N2 1.739(3), Si1–Se1 2.2915(10), Si1–Se2 2.2773(10), N1–Si1–N2 112.46(14), Se1–Si1–Se2 111.61(4);  $\Sigma\alpha$  at N1 359.4, at N2 360.0.

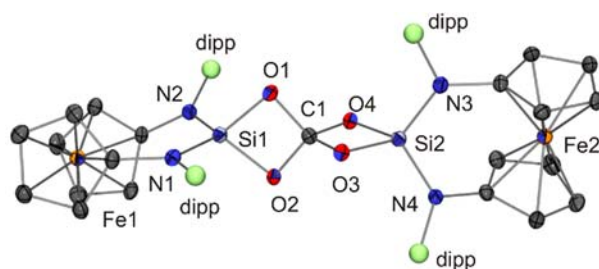

**Figure S3.** Molecular structure of  $(1\text{DippSiO}_2)_2\text{C}\cdot 2\text{C}_6\text{H}_6$  (ORTEP plot, 30 % ellipsoids) in the crystal. Hydrogen atoms and the atoms of the Dipp groups, except the N-bonded  $\text{C}_{\text{ipso}}$  atoms (dipp, shown as circles of arbitrary size in pale green), as well as the solvent molecules have been omitted for clarity. Selected bond lengths [Å] and angles [°]: Si1–N1 1.694(4), Si1–N2 1.700(4), Si1–O1 1.677(3), Si1–O2 1.667(3), Si2–N3 1.713(4), Si2–N4 1.704(4), Si2–O3 1.670(3), Si2–O4 1.681(3), C1–O1 1.402(6), C1–O2 1.420(6), C1–O3 1.403(5), C1–O4 1.402(6), N1–Si1–N2 112.7(2), N3–Si2–N4 112.9(2), O1–Si1–O2 80.7(2), O3–Si2–O4 80.7(2);  $\Sigma\chi$  at N1 359.9, at N2 359.9, at N3 360.0, at N4 360.0.

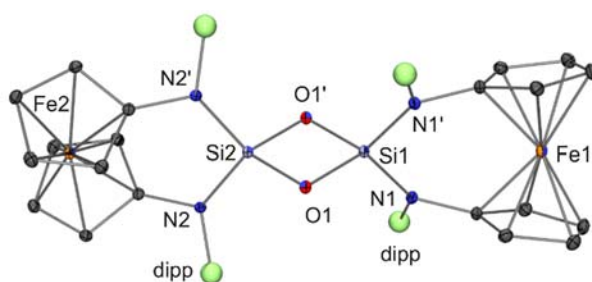

**Figure S4.** Molecular structure of  $(1\text{DippSiO})_2\cdot 3\text{C}_6\text{H}_6$  (ORTEP plot, 30 % ellipsoids) in the crystal. Hydrogen atoms and the atoms of the Dipp groups, except for the N-bonded  $\text{C}_{\text{ipso}}$  atoms (dipp, shown as circles of arbitrary size in pale green), as well as solvent molecules have been omitted for clarity. Selected bond lengths [Å] and angles [°]: Si1–N1 1.733(2), Si2–N2 1.740(2), Si1–O1 1.6819(15), Si2–O1 1.6791(15), N1–Si1–N1' 107.24(12), N2–Si2–N2' 106.50(12), O1–Si1–O1' 86.86(11), O1–Si2–O1' 87.04(10);  $\Sigma\chi$  at N1 359.8, at N2 359.9.

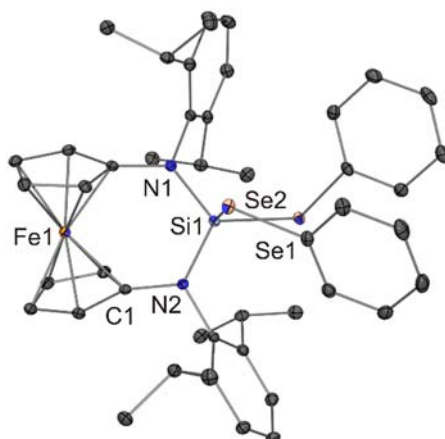

**Figure S5.** Molecular structure of **1DippSi(SePh)<sub>2</sub>·½C<sub>6</sub>H<sub>6</sub>** (ORTEP plot, 30 % ellipsoids) in the crystal. Hydrogen atoms and the solvent molecule have been omitted for clarity. Selected bond lengths [Å] and angles [°]: Si1–N1 1.745(2), Si1–N2 1.741(2), Si1–Se1 2.2717(6), Si1–Se2 2.2959(6), N1–Si1–N2 109.49(9), Se1–Si1–Se2 107.56(3);  $\Sigma\chi$  at N1 359.4, at N2 360.0.

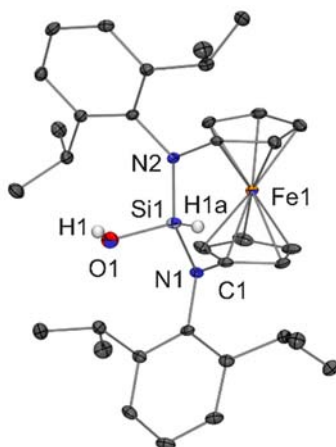

**Figure S6.** Molecular structure of **1DippSi(H)(OH)** (ORTEP plot, 30 % ellipsoids) in the crystal. C-bonded hydrogen atoms have been omitted for clarity. Selected bond lengths [Å] and angles [°]: Si1–N1 1.7197(16), Si1–N2 1.7199(16), Si1–O1 1.6071(16), N1–Si1–N2 111.49(8);  $\Sigma\chi$  at N1 359.9, at N2 359.4.

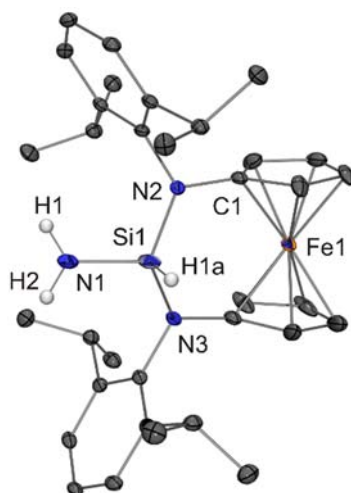

**Figure S7.** Molecular structure of **1DippSi(H)(NH<sub>2</sub>)·C<sub>6</sub>H<sub>6</sub>** (ORTEP plot, 30 % ellipsoids) in the crystal. C-bonded hydrogen atoms and the solvent molecule have been omitted for clarity. Selected bond lengths [Å] and angles [°]: Si1–N1 1.691(4), Si1–N2 1.721(3), Si1–N3 1.730(3), N2–Si1–N3 111.72(14);  $\Sigma\chi$  at N2 358.5, at N3 358.0.

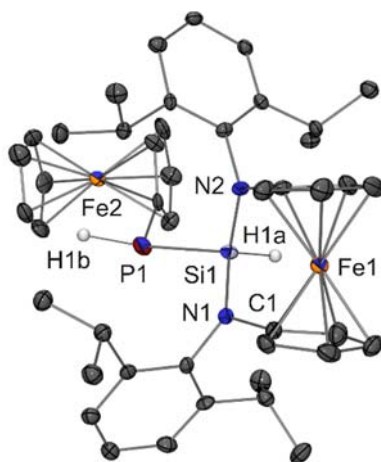

**Figure S8.** Molecular structure of **1DippSi(H)(PHFc)** (ORTEP plot, 30 % ellipsoids) in the crystal. C-bonded hydrogen atoms have been omitted for clarity. Selected bond lengths [Å] and angles [°]: Si1–N1 1.734(7), Si1–N2 1.721(7), Si1–P1 2.255(4), N1–Si–N2 110.3(3), Si1–P1–C35 104.4(3);  $\Sigma\chi$  at N1 357.9, at N2 357.8.

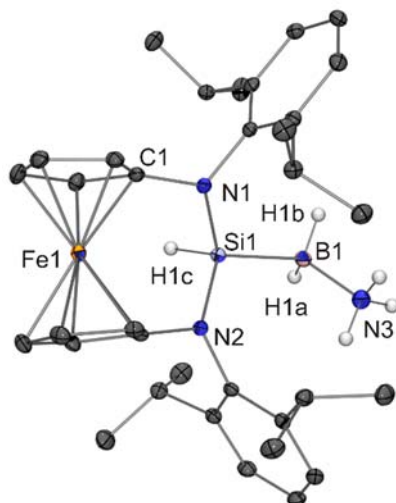

**Figure S9.** Molecular structure of **1DippSi(H)(BH<sub>2</sub>NH<sub>3</sub>)** (ORTEP plot, 30 % ellipsoids) in the crystal. C-bonded hydrogen atoms have been omitted for clarity. Selected bond lengths [Å] and angles [°]: Si1–N1 1.7571(14), Si1–N2 1.7694(14), Si1–B1 2.008(2), N3–B1 1.600(3), N1–Si–N2 107.84(7), Si1–B1–N1 116.41(13);  $\Sigma\chi$  at N1 358.3, at N2 356.6

### C Plots of NMR Spectra

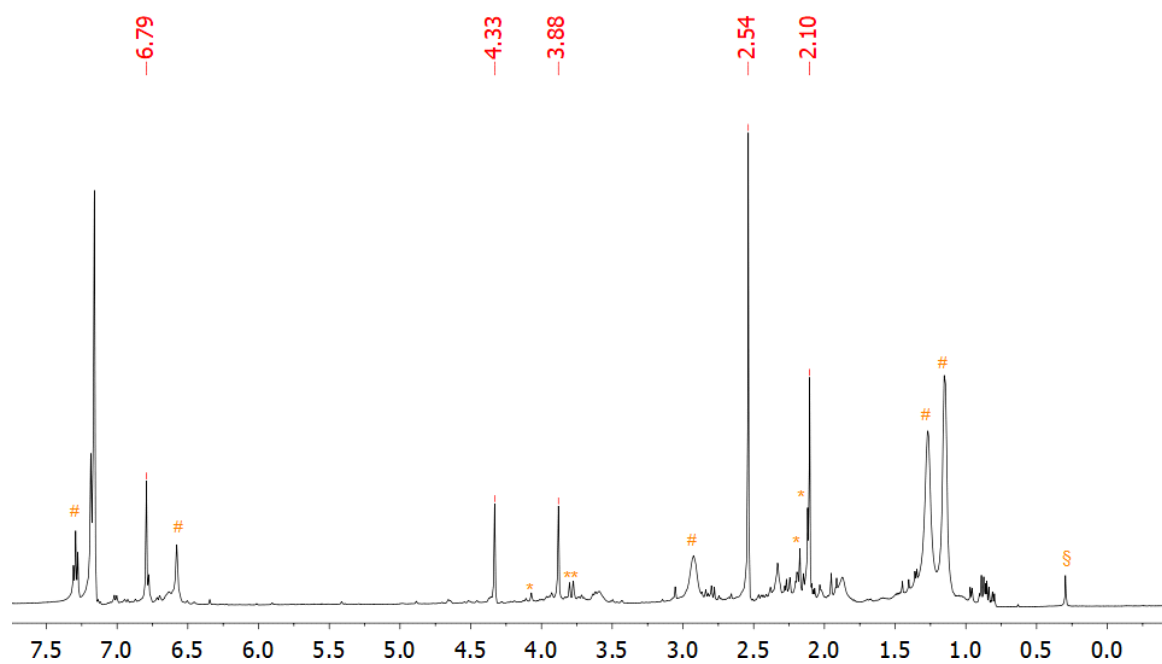

**Figure S10.**  $^1\text{H}$  NMR spectrum of **1MesSi** ( $\text{C}_6\text{D}_6$ , 499.7 MHz) generated from **1MesLi<sub>2</sub>** and  $[\text{SiCl}_2(\text{IPr})]$  in an NMR experiment. Signals marked belong to IPr (#), **1MesH<sub>2</sub>** (\*) and silicon grease (§).

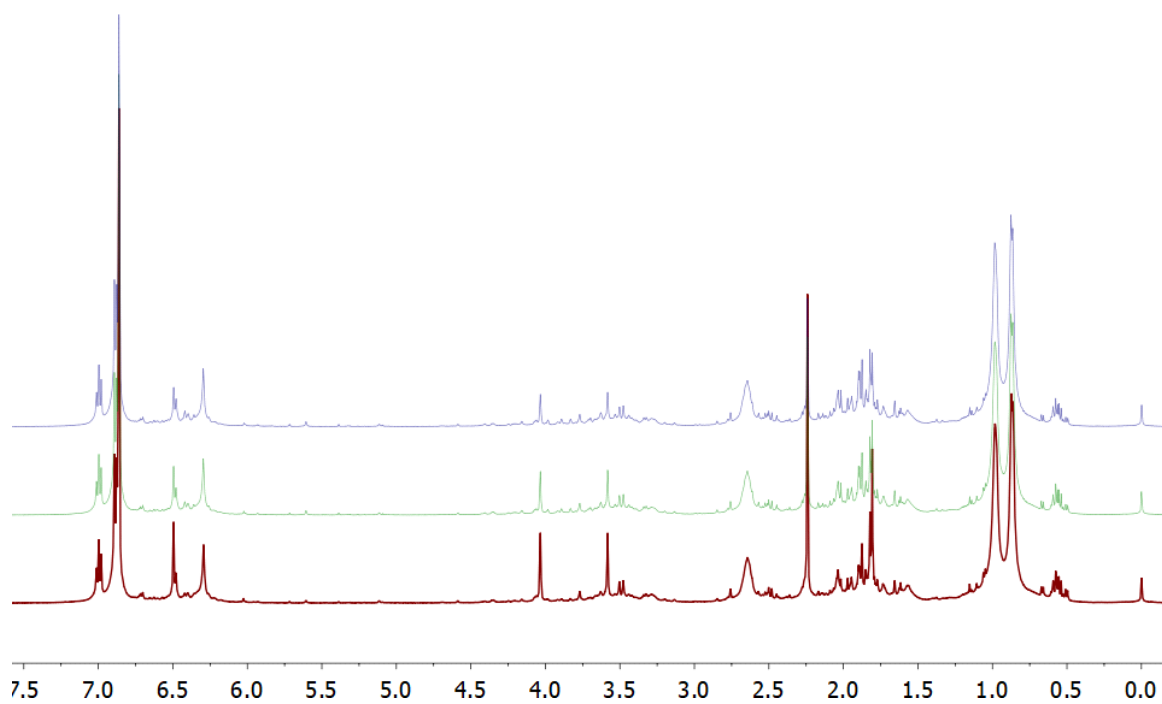

**Figure S11.**  $^1\text{H}$  NMR spectra of **1MesSi** (generated from **1MesLi<sub>2</sub>** and  $[\text{SiCl}_2(\text{IPr})]$  in an NMR experiment) after 15 minutes (red), 1 h (green) and 2.5 h (violet) ( $\text{C}_6\text{D}_6$ , 499.7 MHz).



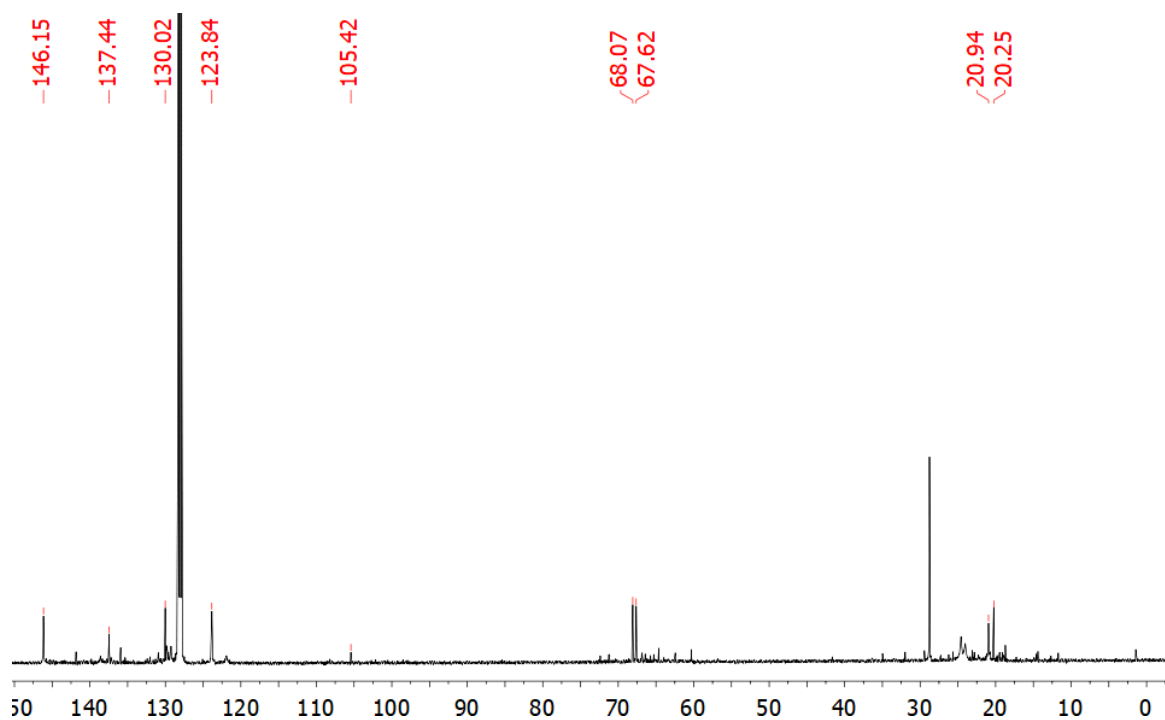

**Figure S12.**  $^{13}\text{C}\{^1\text{H}\}$  NMR spectrum of **1MesSi** ( $\text{C}_6\text{D}_6$ , 100.5 MHz) generated from **1MesLi<sub>2</sub>** and  $[\text{SiCl}_2(\text{IPr})]$  in an NMR experiment.

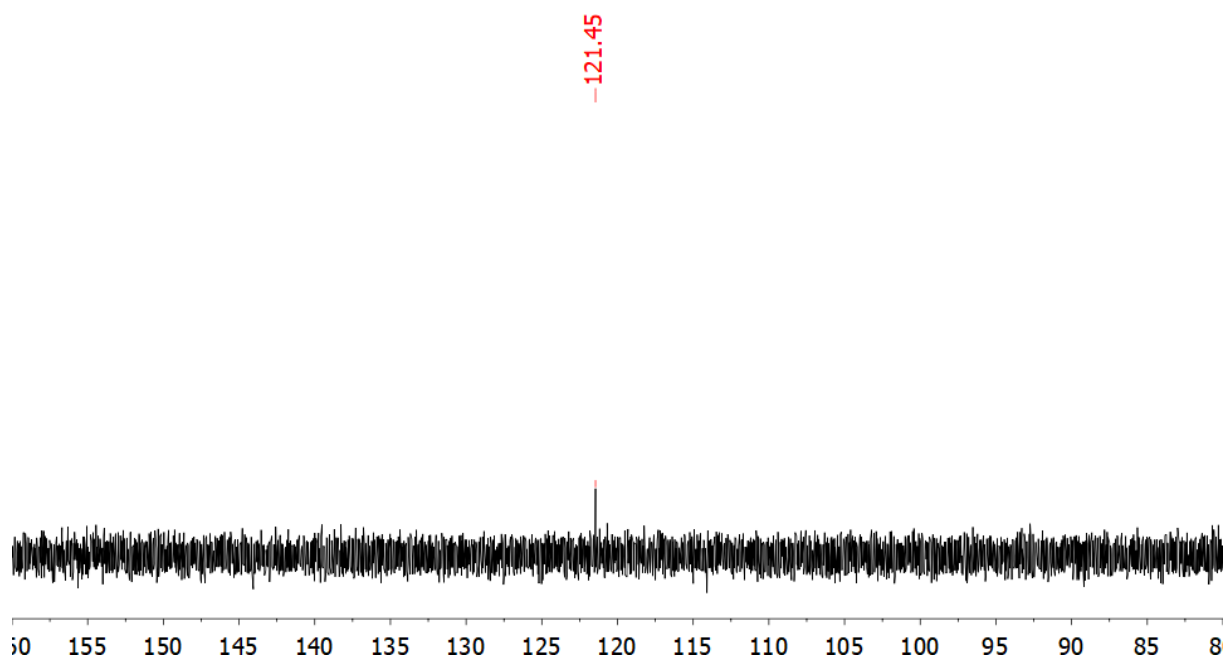

**Figure S13.**  $^{29}\text{Si}\{^1\text{H}\}$  NMR spectrum of **1MesSi** ( $\text{C}_6\text{D}_6$ , 99.3 MHz) generated from **1MesLi<sub>2</sub>** and  $[\text{SiCl}_2(\text{IPr})]$  in an NMR experiment.

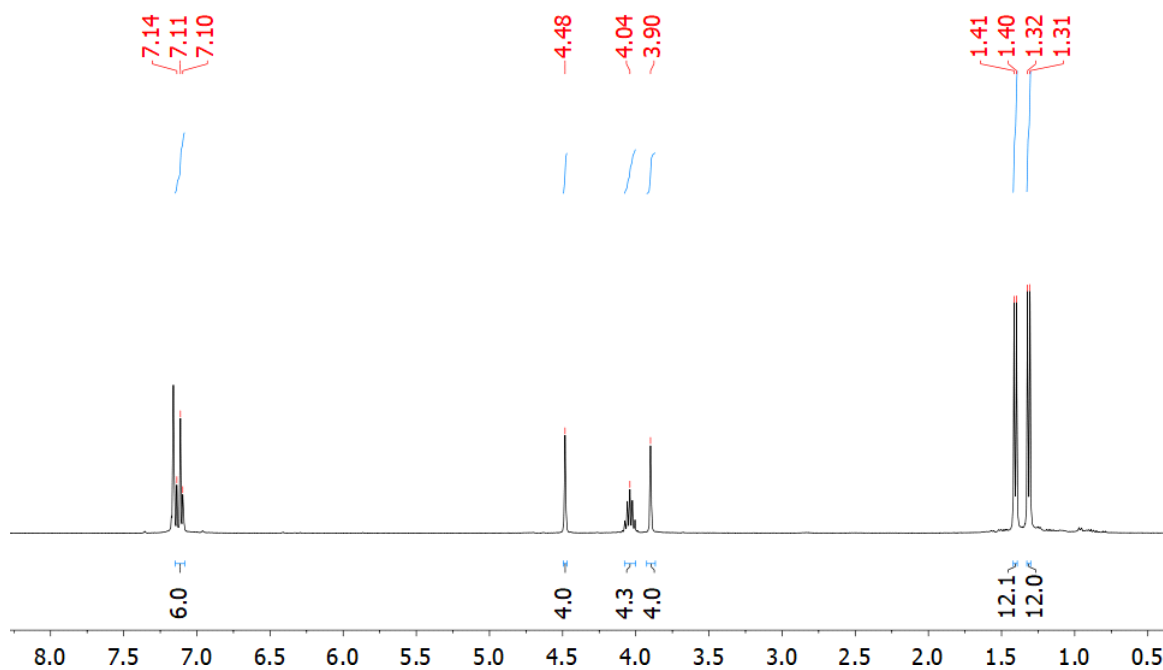

**Figure S14.**  $^1\text{H}$  NMR spectrum of **1DippSi** ( $\text{C}_6\text{D}_6$ , 499.7 MHz).

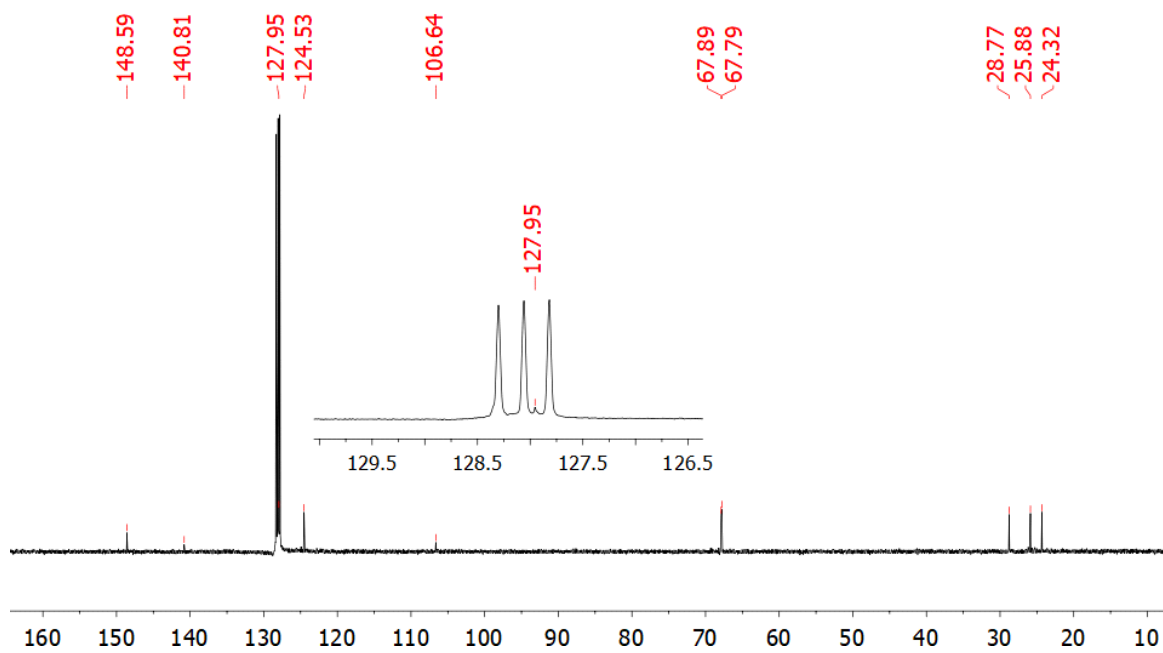

**Figure S15.**  $^{13}\text{C}\{^1\text{H}\}$  NMR spectrum **1DippSi** ( $\text{C}_6\text{D}_6$ , 100.5 MHz).

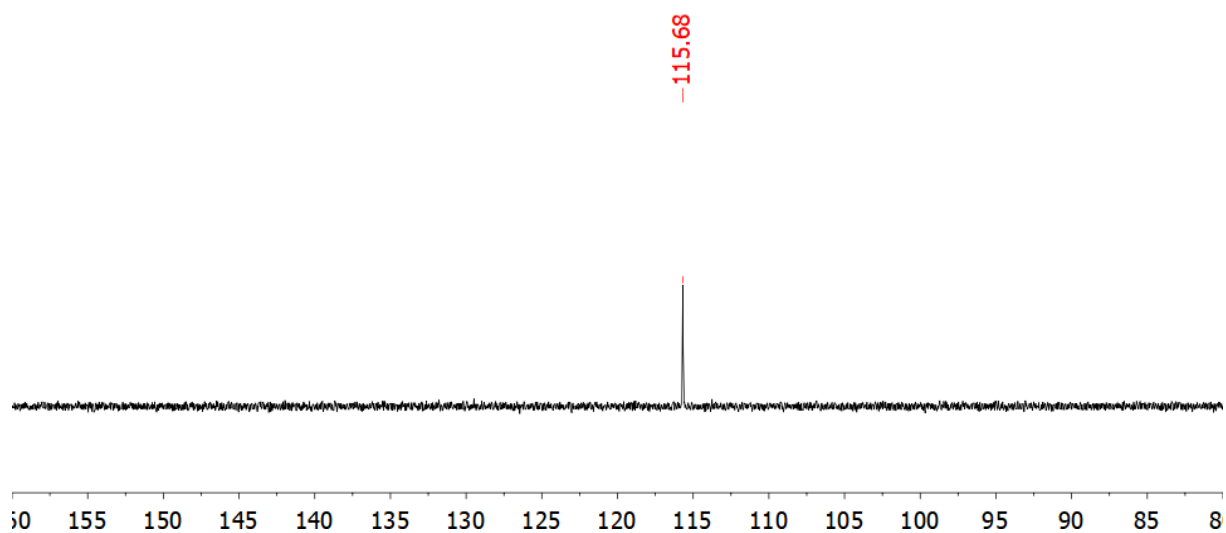

**Figure S16.**  $^{29}\text{Si}\{^1\text{H}\}$  NMR spectrum of **1DippSi** ( $\text{C}_6\text{D}_6$ , 99.3 MHz).

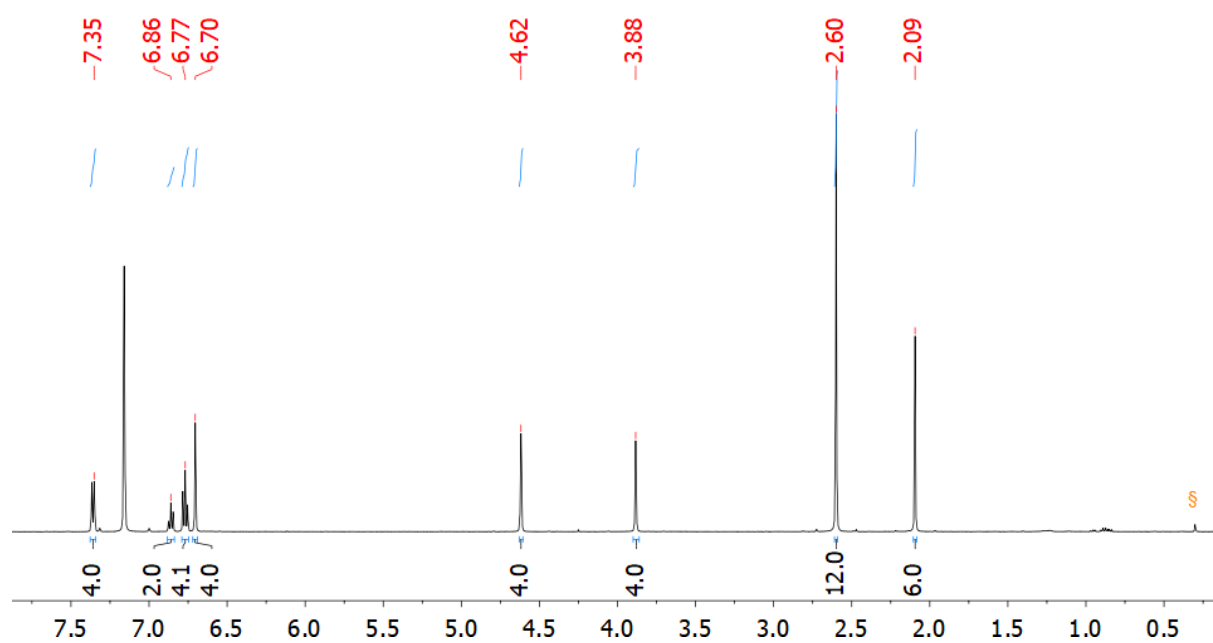

**Figure S17.**  $^1\text{H}$  NMR spectrum of **1MesSi(SePh)<sub>2</sub>** ( $\text{C}_6\text{D}_6$ , 499.7 MHz). The signal marked § belongs to silicon grease (§).

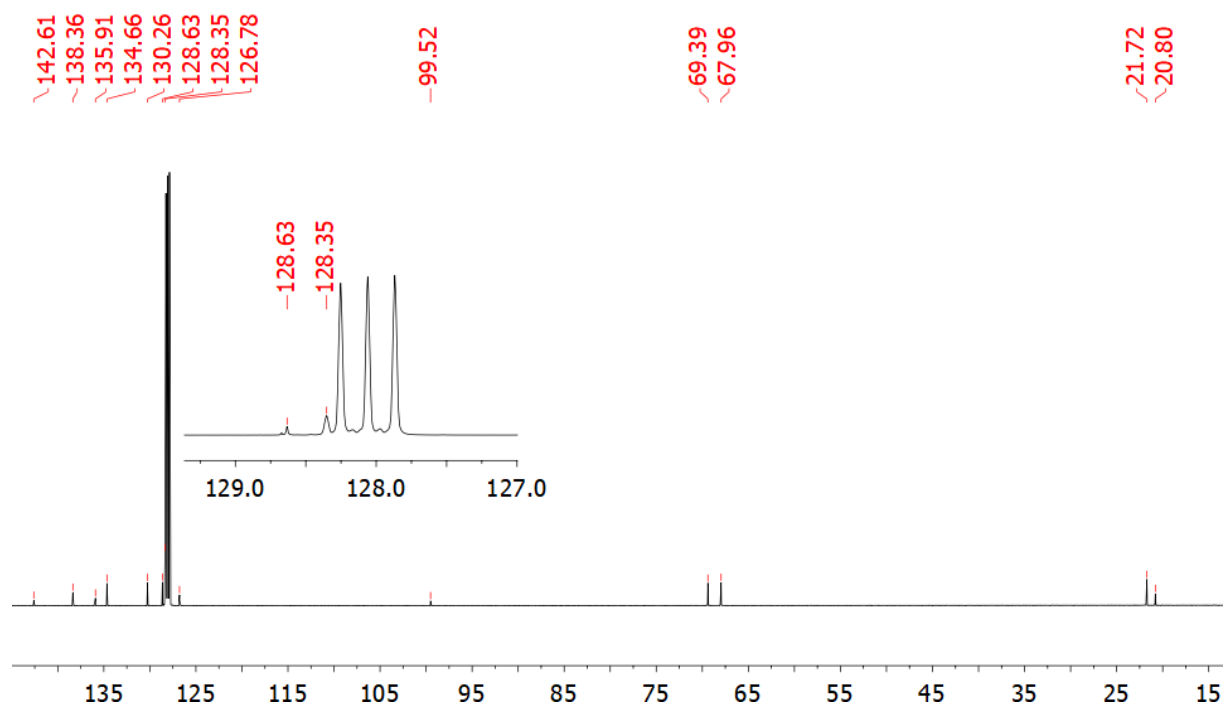

**Figure S18.**  $^{13}\text{C}\{^1\text{H}\}$  NMR spectrum of **1MesSi(SePh)<sub>2</sub>** ( $\text{C}_6\text{D}_6$ , 100.5 MHz).

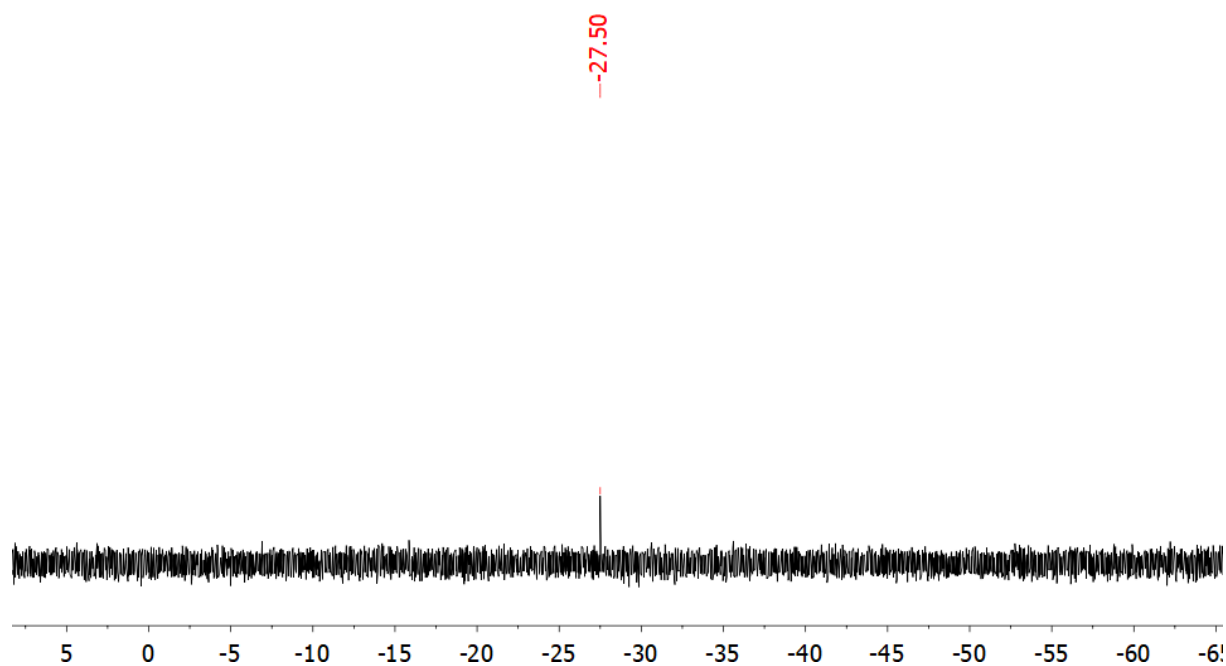

**Figure S19.**  $^{29}\text{Si}\{^1\text{H}\}$  NMR spectrum of **1MesSi(SePh)<sub>2</sub>** ( $\text{C}_6\text{D}_6$ , 99.3 MHz).

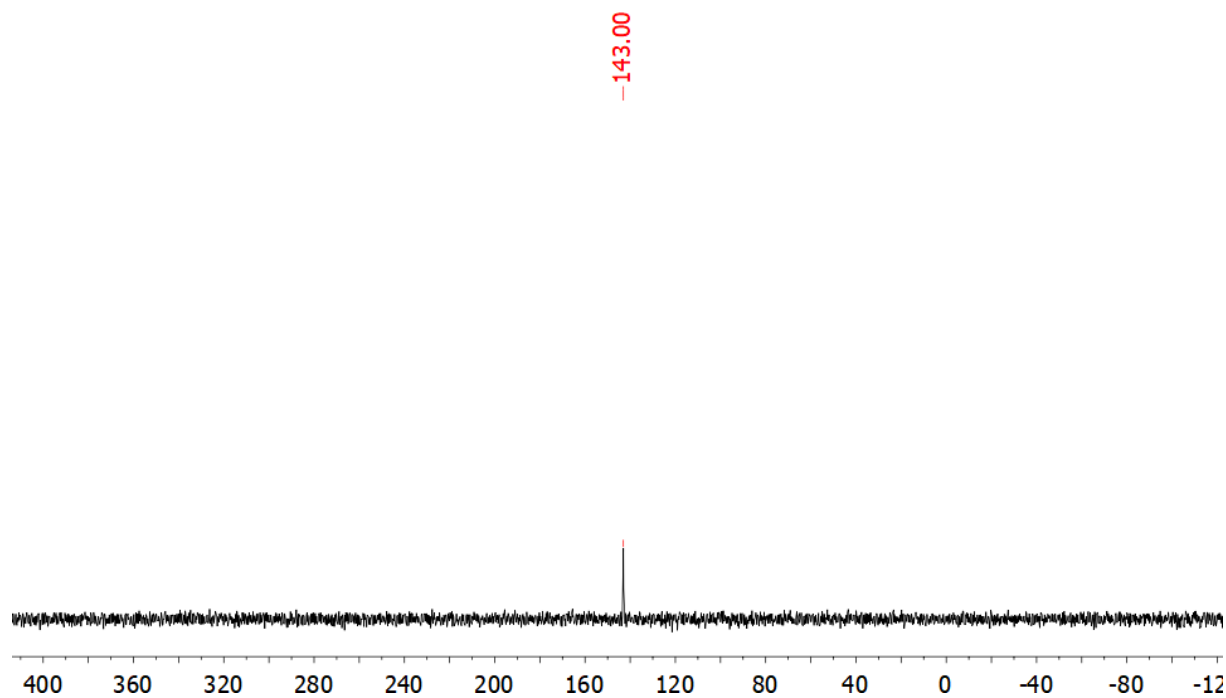

**Figure S20.**  $^{77}\text{Se}\{^1\text{H}\}$  NMR spectrum of **1MesSi(SePh)<sub>2</sub>** ( $\text{C}_6\text{D}_6$ , 95.3 MHz).

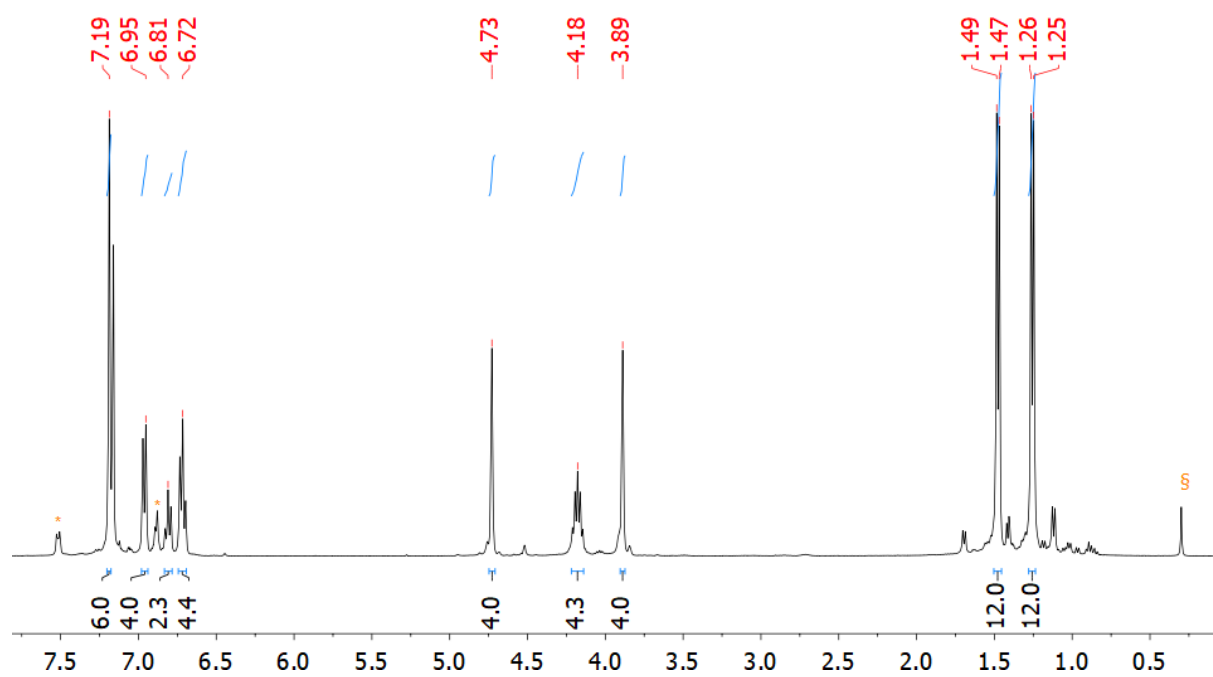

**Figure S21.**  $^1\text{H}$  NMR spectrum of **1DippSi(SePh)<sub>2</sub>** ( $\text{C}_6\text{D}_6$ , 499.7 MHz). Signals marked belong to  $\text{Se}_2\text{Ph}_2$  (\*) and silicon grease (§).

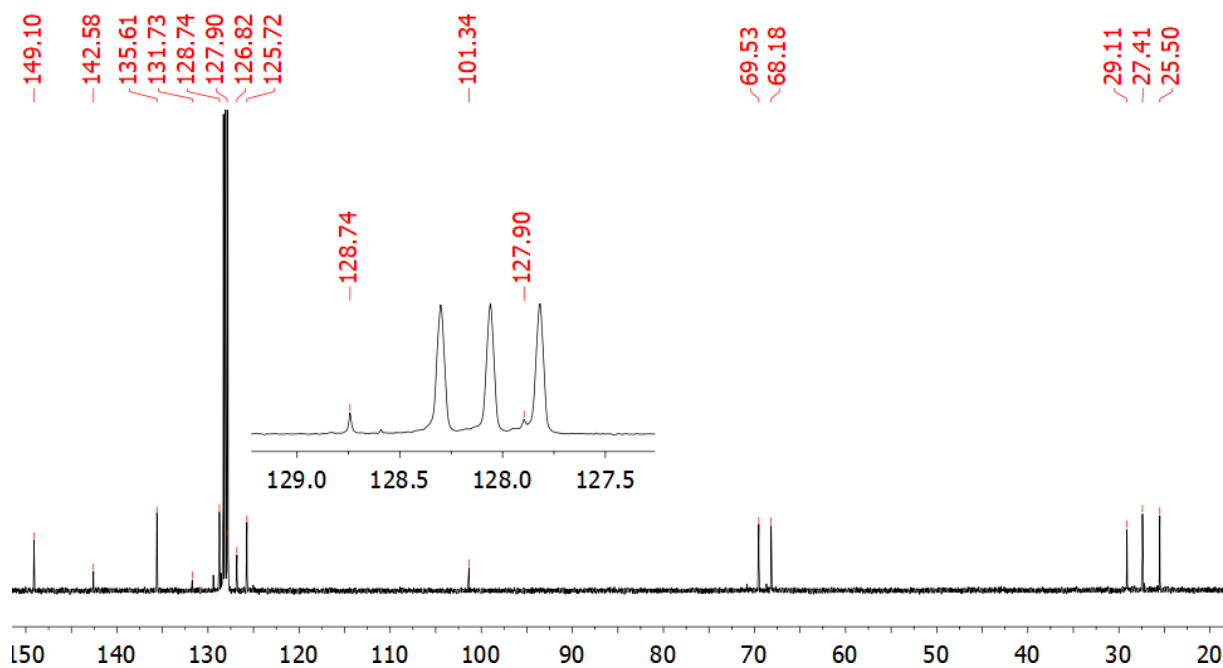

**Figure S22.**  $^{13}\text{C}\{^1\text{H}\}$  NMR spectrum of **1DippSi(SePh)<sub>2</sub>** ( $\text{C}_6\text{D}_6$ , 100.5 MHz).

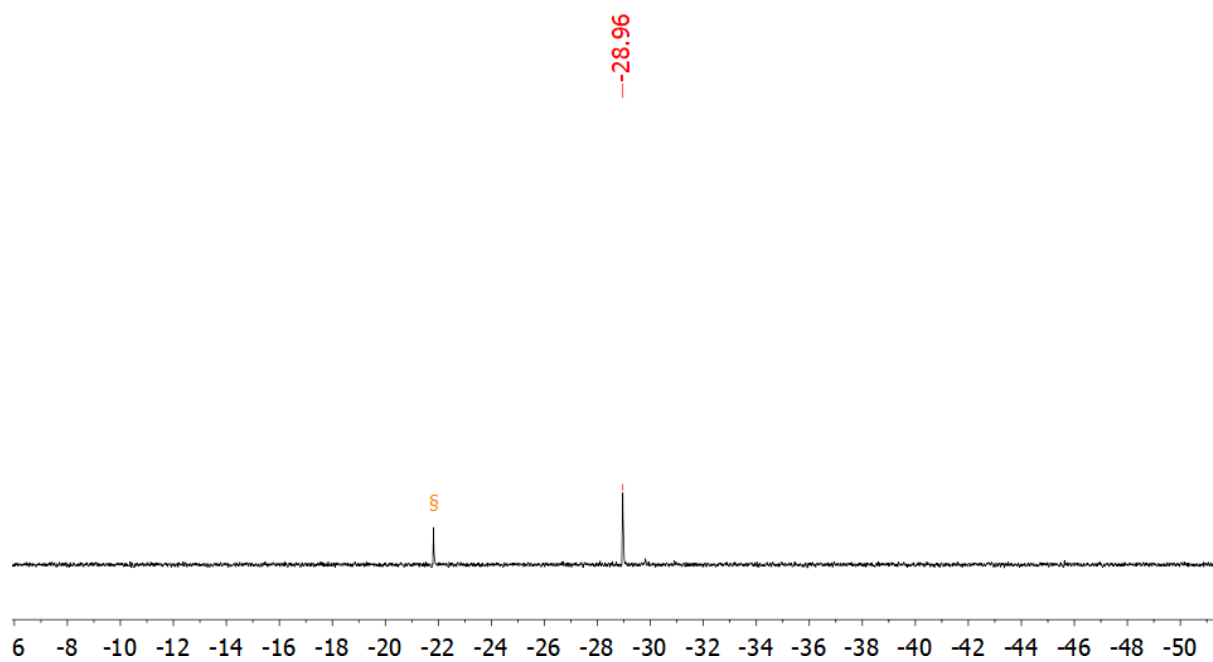

**Figure S23.**  $^{29}\text{Si}\{^1\text{H}\}$  NMR spectrum of **1DippSi(SePh)<sub>2</sub>** ( $\text{C}_6\text{D}_6$ , 99.3 MHz). The signal marked belongs to silicon grease (§).

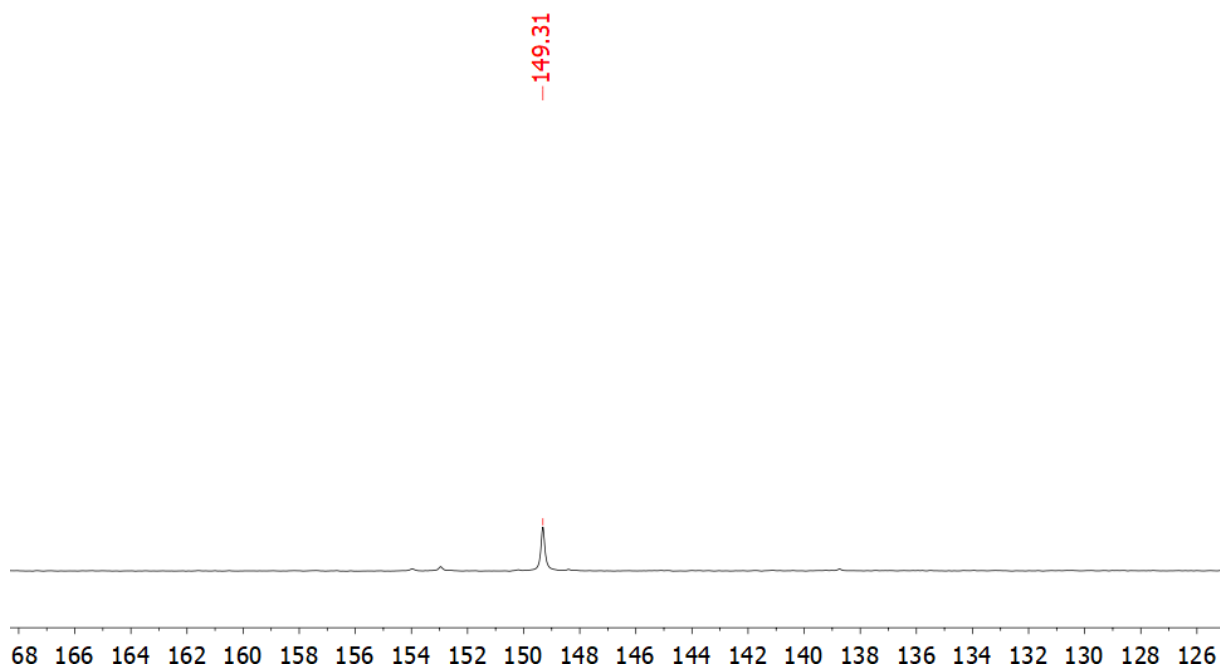

**Figure S24.**  $^{77}\text{Se}\{^1\text{H}\}$  NMR spectrum of **1DippSi(SePh)<sub>2</sub>** ( $\text{C}_6\text{D}_6$ , 95.3 MHz).

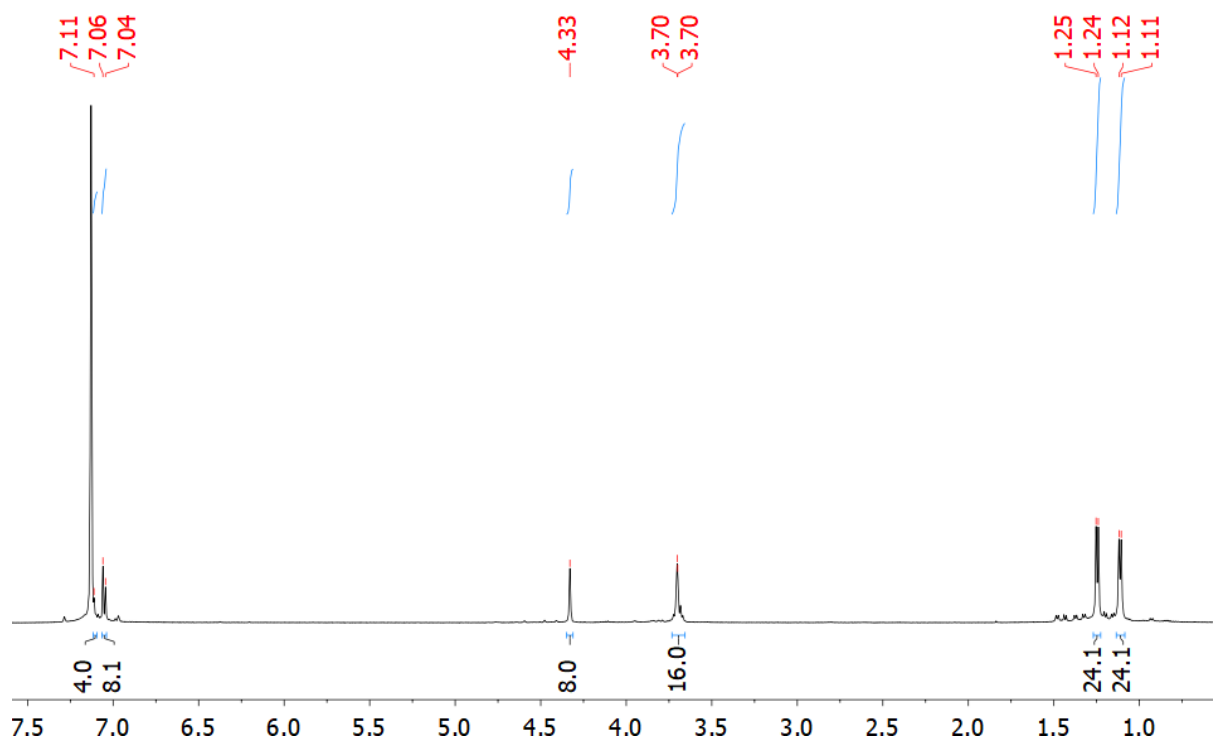

**Figure S25.**  $^1\text{H}$  NMR spectrum of **(1DippSiO<sub>2</sub>)<sub>2</sub>C** ( $\text{C}_6\text{D}_6$ , 499.7 MHz).

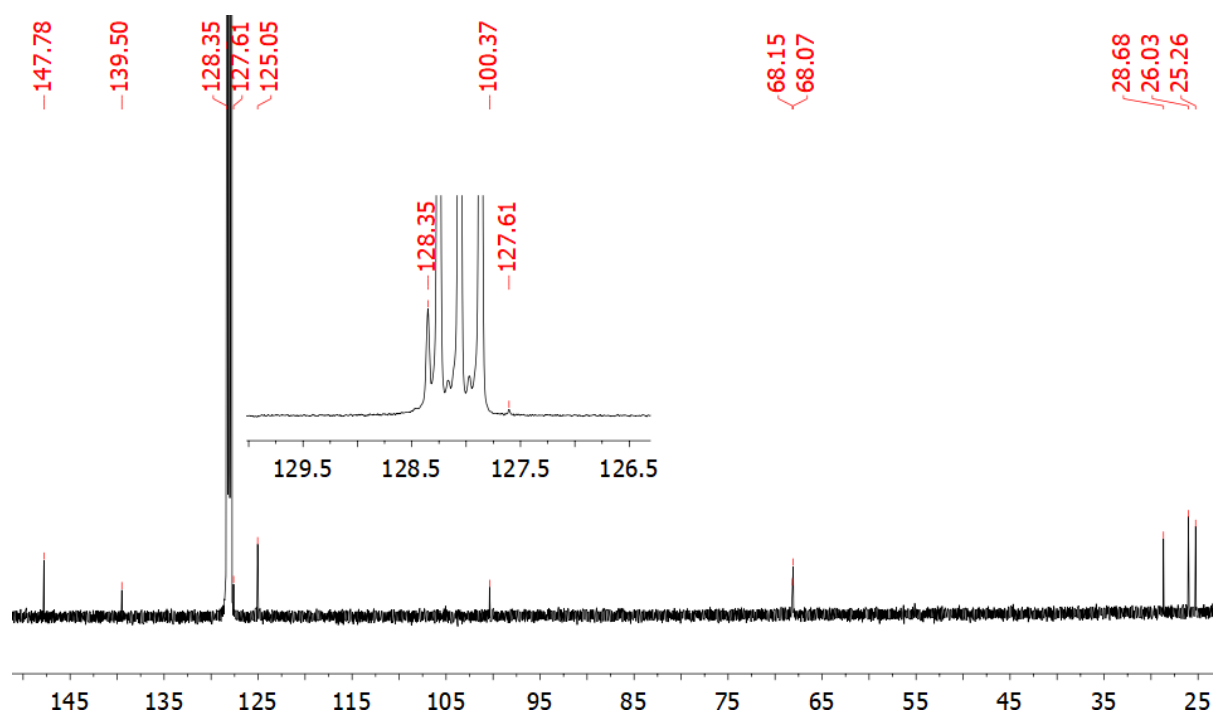

Figure S26.  $^{13}\text{C}\{^1\text{H}\}$  NMR spectrum of  $(\mathbf{1DippSiO}_2)_2\text{C}$  ( $\text{C}_6\text{D}_6$ , 100.5 MHz).

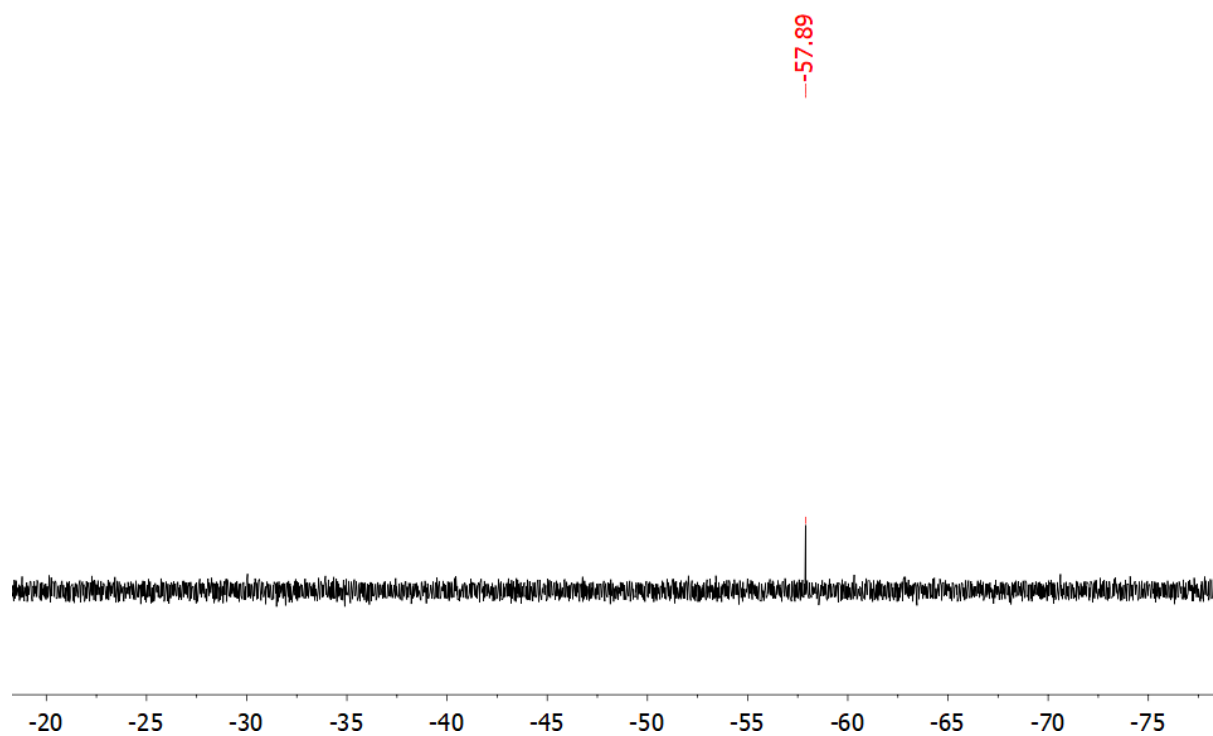

Figure S27.  $^{29}\text{Si}\{^1\text{H}\}$  NMR spectrum of  $(\mathbf{1DippSiO}_2)_2\text{C}$  ( $\text{C}_6\text{D}_6$ , 99.3 MHz).



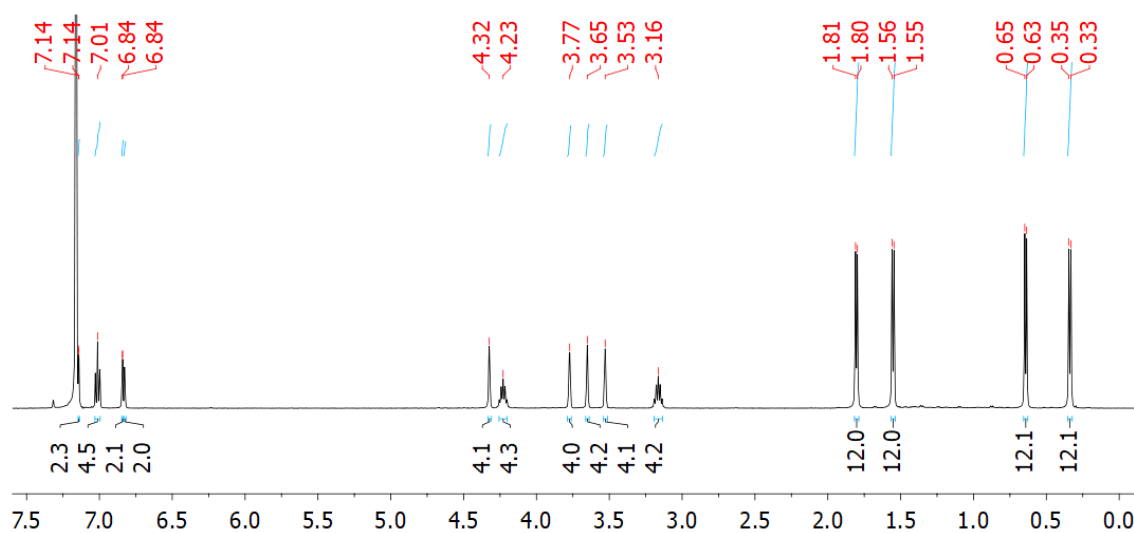

**Figure S28.**  $^1\text{H}$  NMR spectrum of  $(\mathbf{1DippSiO})_2$  ( $\text{C}_6\text{D}_6$ , 499.7 MHz).

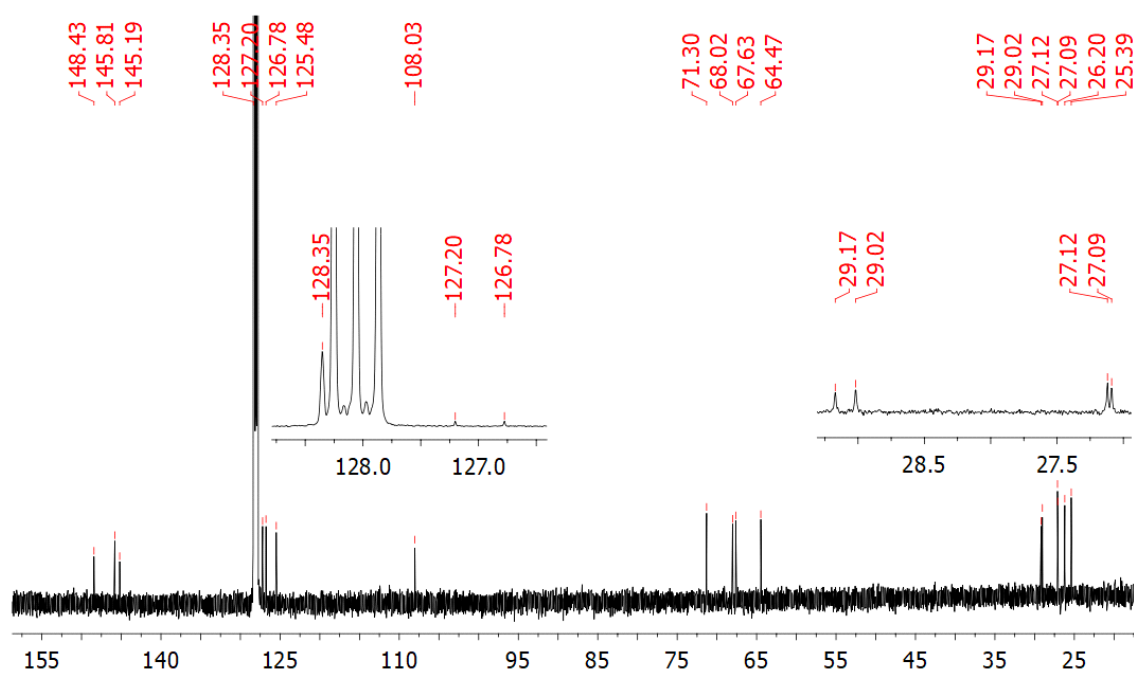

**Figure S29.**  $^{13}\text{C}\{^1\text{H}\}$  NMR spectrum of  $(\mathbf{1DippSiO})_2$  ( $\text{C}_6\text{D}_6$ , 100.5 MHz).

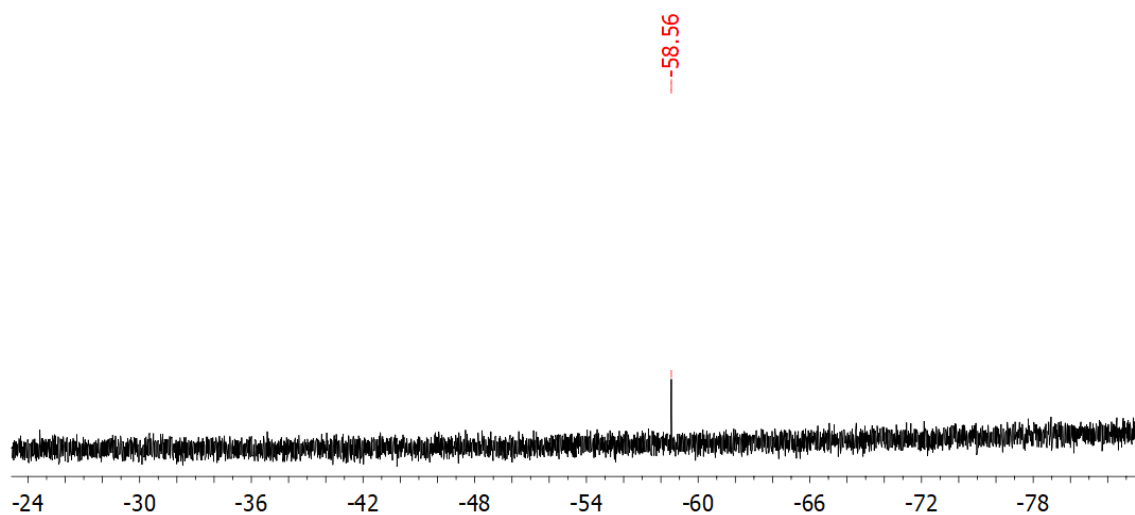

Figure S30.  $^{29}\text{Si}\{^1\text{H}\}$  NMR spectrum of  $(\mathbf{1DippSiO})_2$  ( $\text{C}_6\text{D}_6$ , 99.3 MHz).

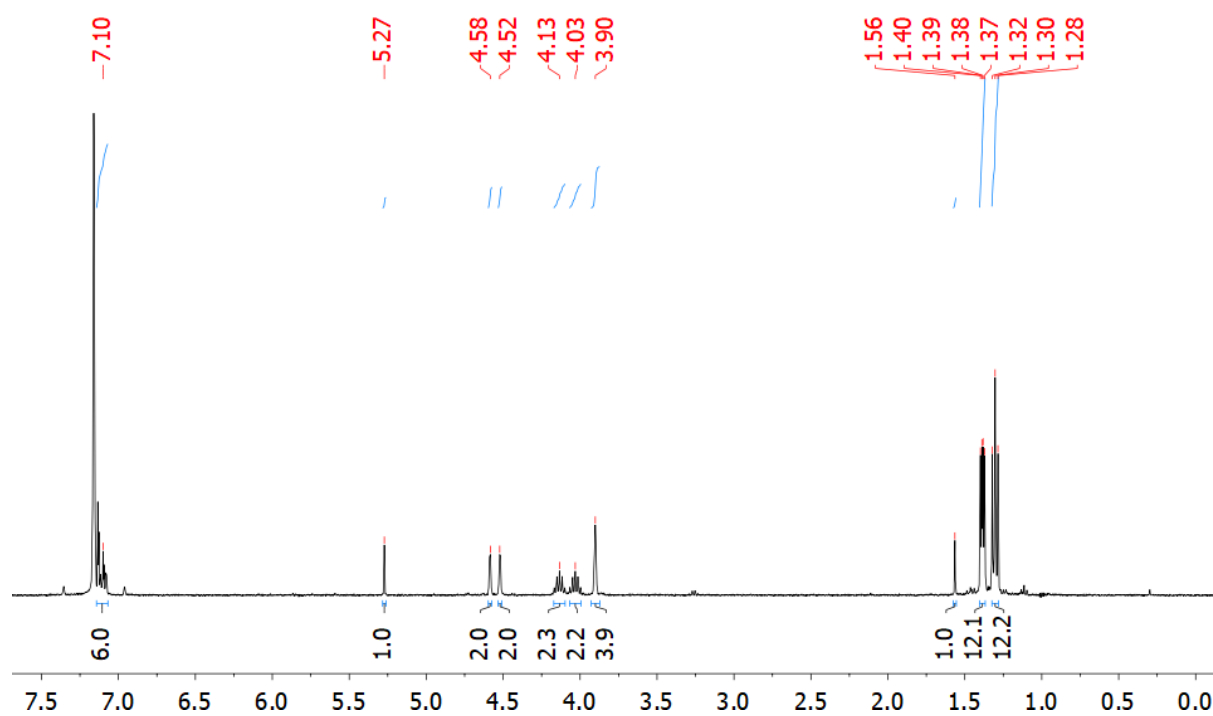

Figure S31.  $^1\text{H}$  NMR spectrum of  $\mathbf{1DippSi(H)OH}$  ( $\text{C}_6\text{D}_6$ , 499.7 MHz).

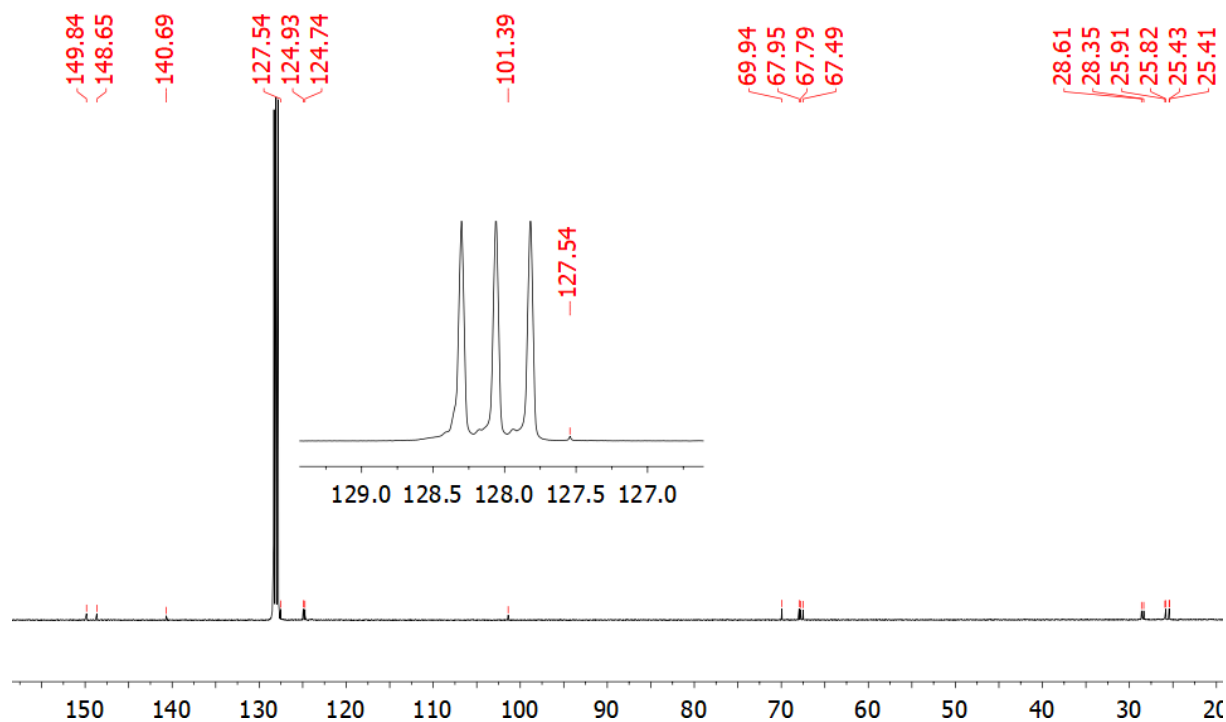

**Figure S32.**  $^{13}\text{C}\{^1\text{H}\}$  NMR spectrum of **1DippSi(H)OH** ( $\text{C}_6\text{D}_6$ , 100.5 MHz).

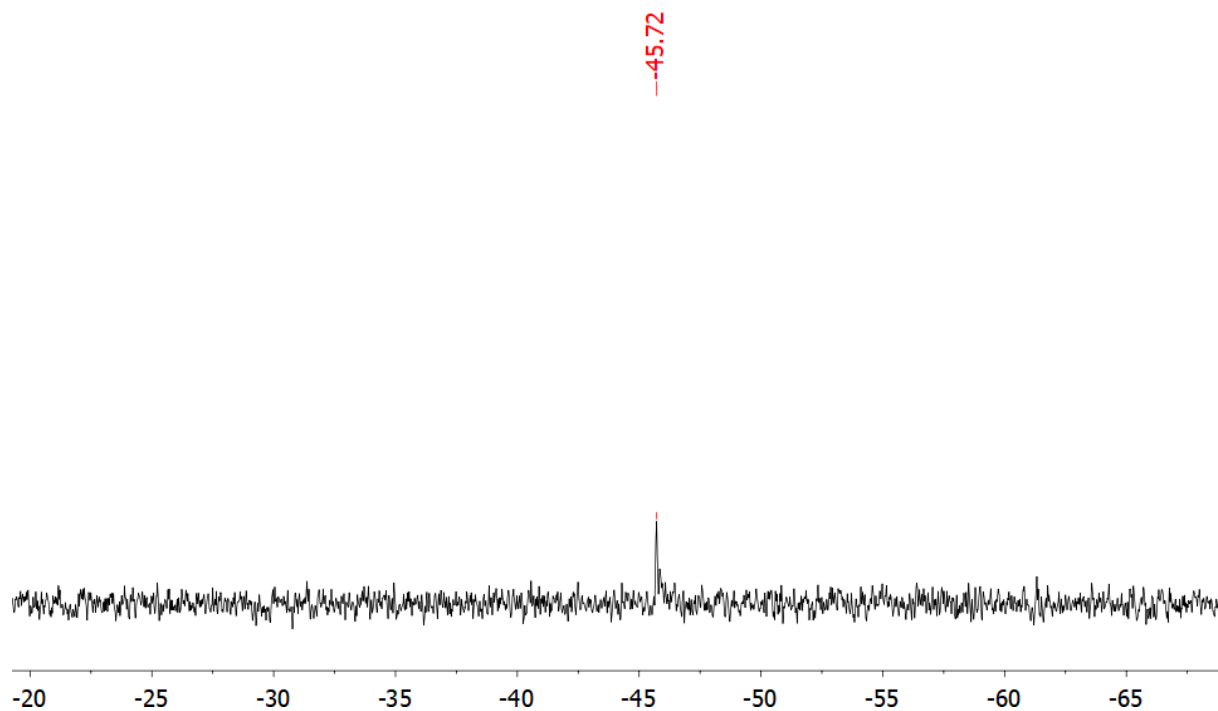

**Figure S33.**  $^{29}\text{Si}\{^1\text{H}\}$  NMR spectrum of **1DippSi(H)OH** ( $\text{C}_6\text{D}_6$ , 99.3 MHz).

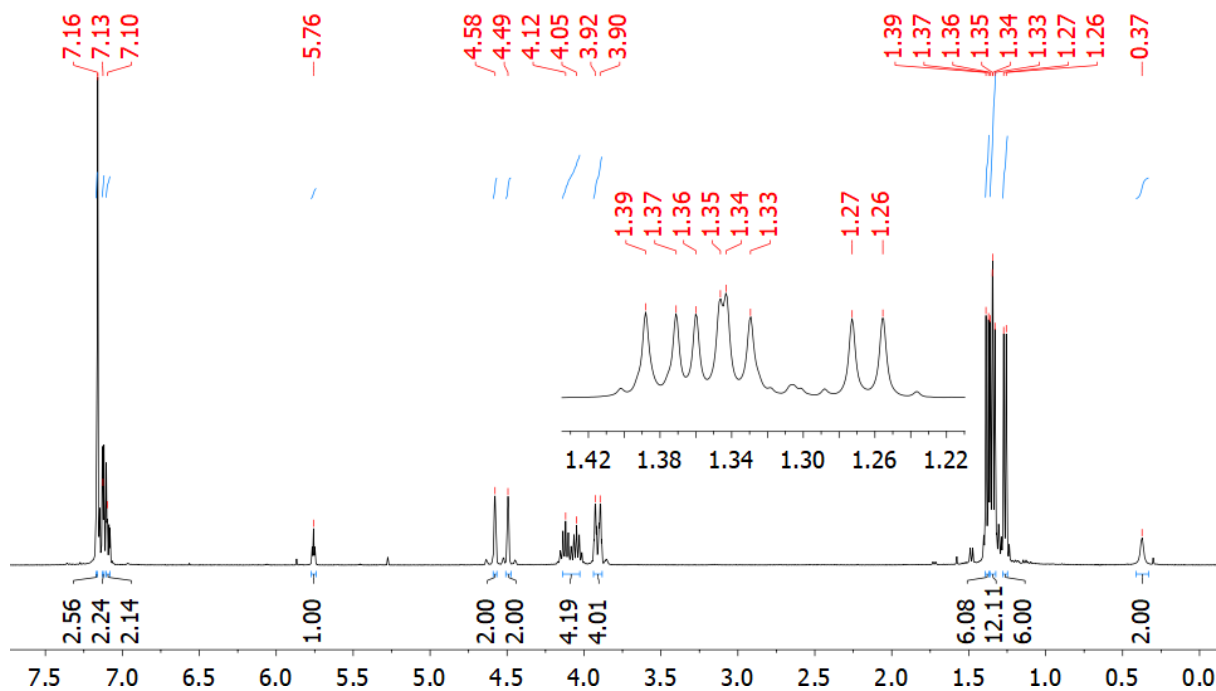

**Figure S34.**  $^1\text{H}$  NMR spectrum of **1DippSi(H)NH<sub>2</sub>** ( $\text{C}_6\text{D}_6$ , 499.7 MHz).

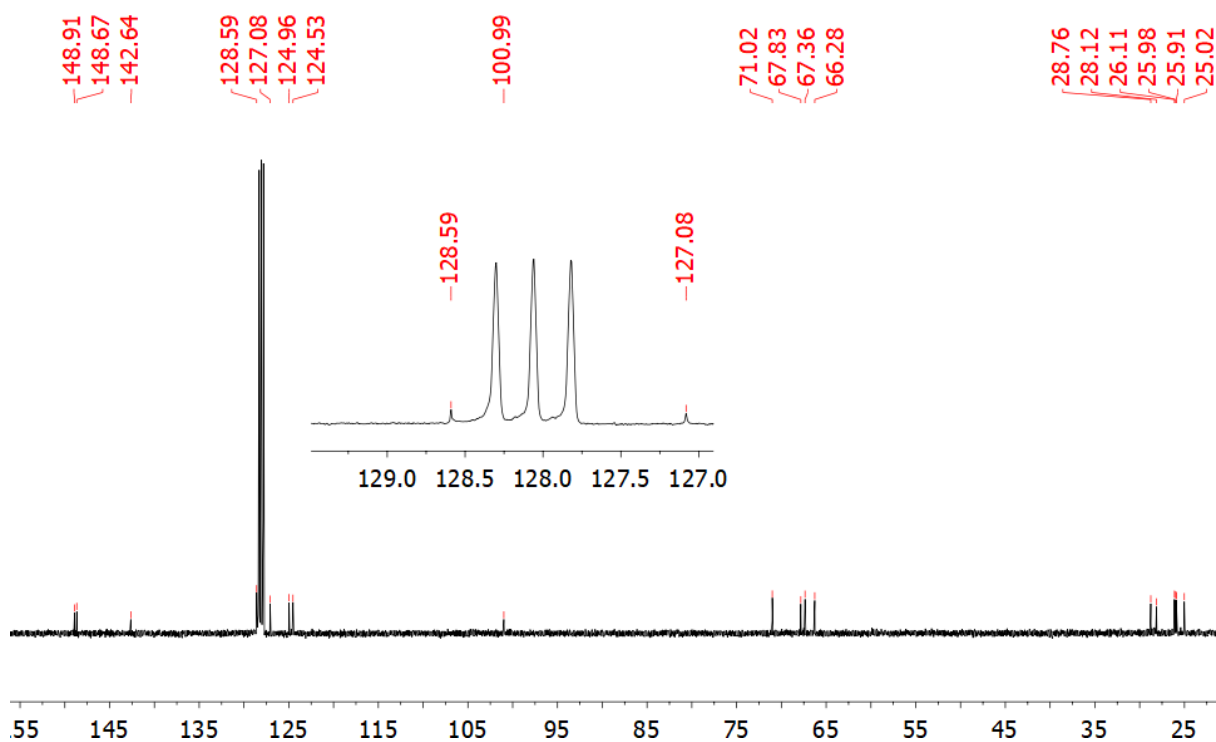

**Figure S35.**  $^{13}\text{C}\{^1\text{H}\}$  NMR spectrum of **1DippSi(H)NH<sub>2</sub>** ( $\text{C}_6\text{D}_6$ , 100.5 MHz).

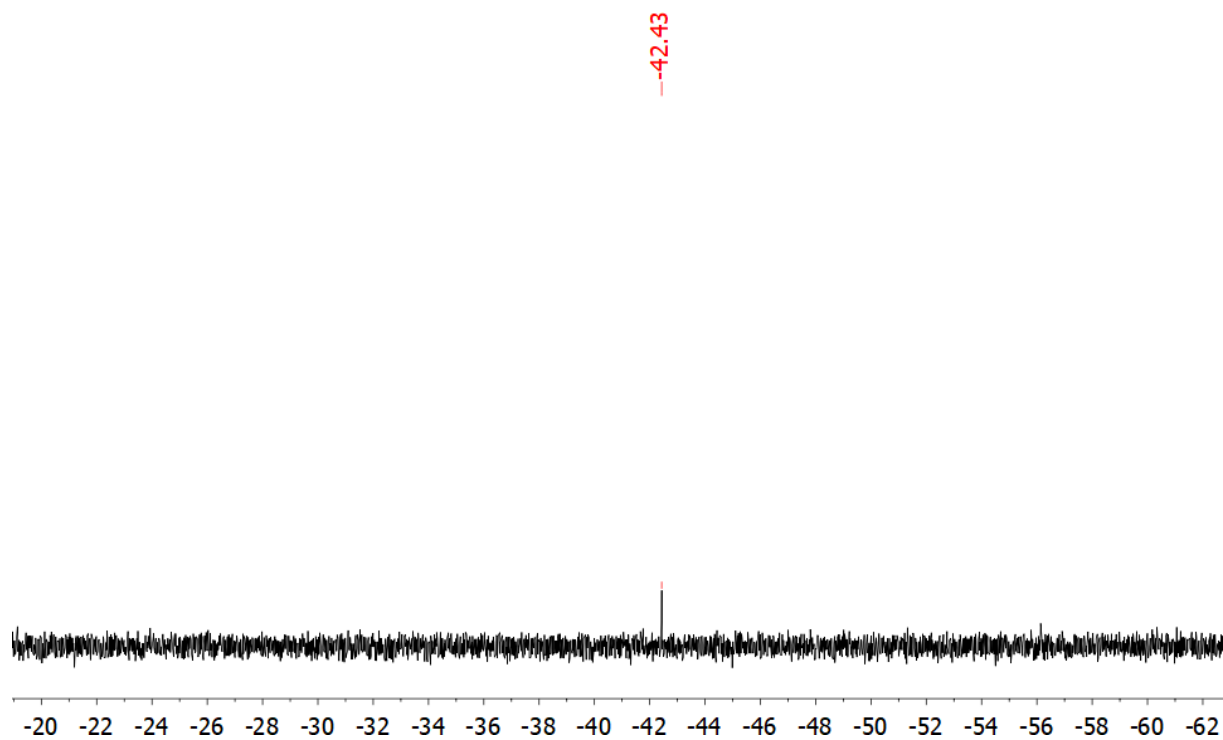

Figure S36.  $^{29}\text{Si}\{^1\text{H}\}$  NMR spectrum of **1DippSi(H)NH<sub>2</sub>** ( $\text{C}_6\text{D}_6$ , 99.3 MHz).

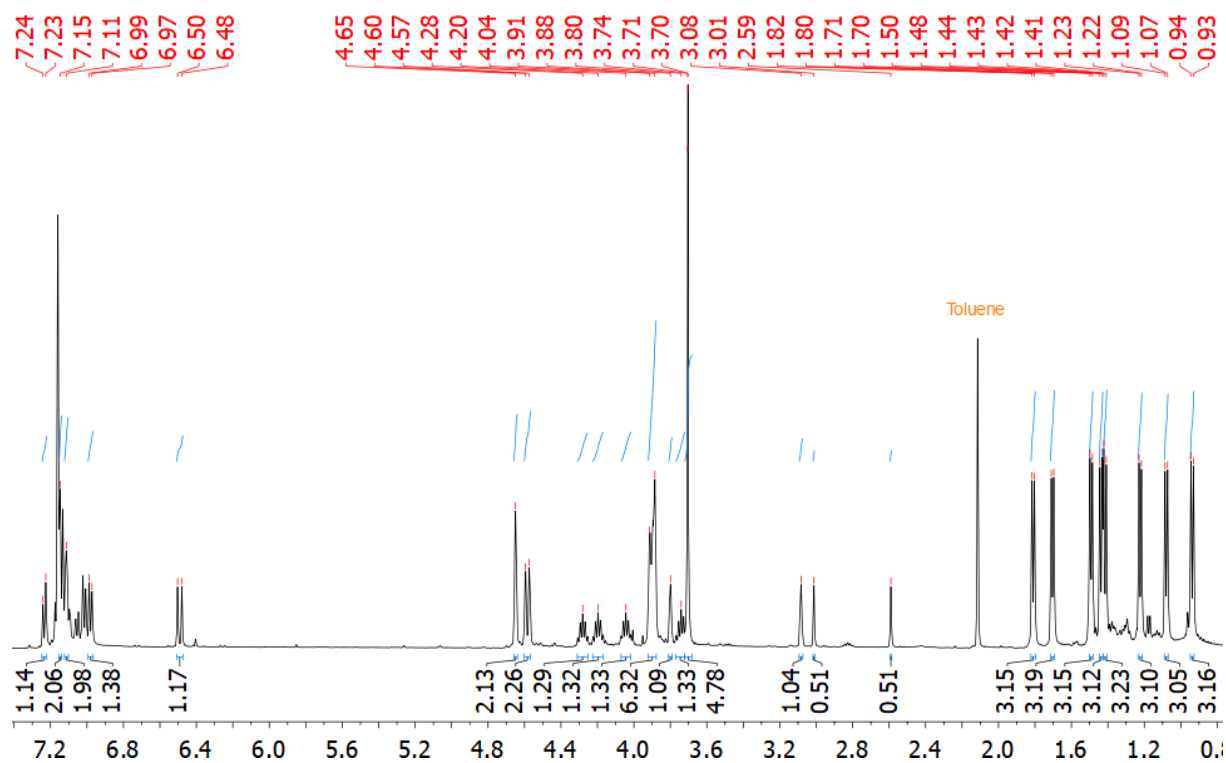

Figure S37.  $^1\text{H}$  NMR spectrum of **1DippSi(H)PHFc** ( $\text{C}_6\text{D}_6$ , 499.7 MHz).

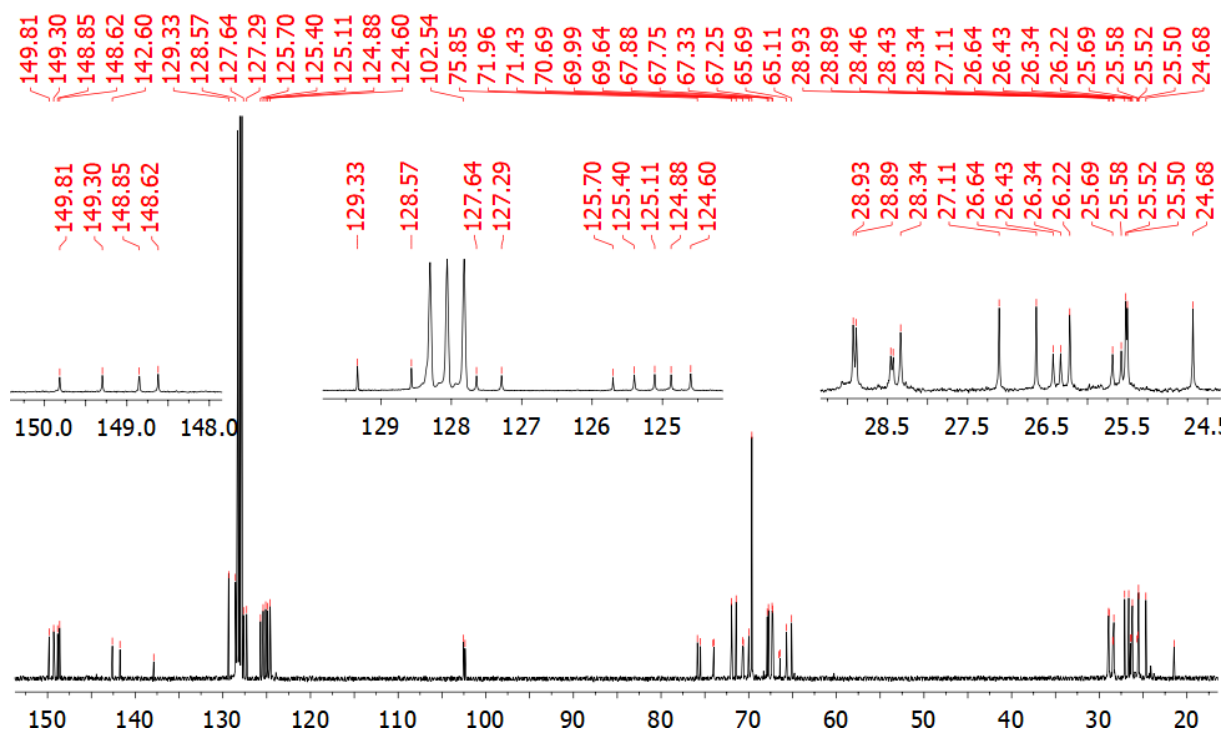

**Figure S38.**  $^{13}\text{C}\{^1\text{H}\}$  NMR spectrum of of **1DippSi(H)PHFc** ( $\text{C}_6\text{D}_6$ , 100.5 MHz).

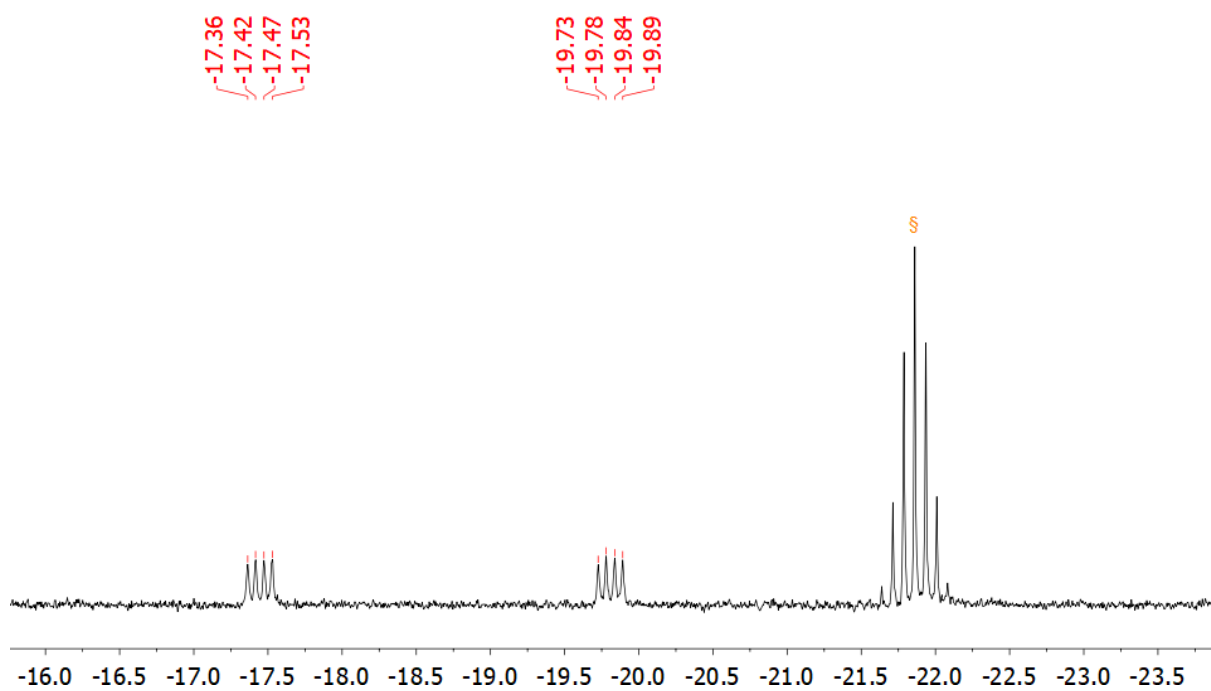

**Figure S39.**  $^{29}\text{Si}$  NMR spectrum of **1DippSi(H)PHFc** ( $\text{C}_6\text{D}_6$ , 99.3 MHz). The signal marked belongs to silicon grease (§).

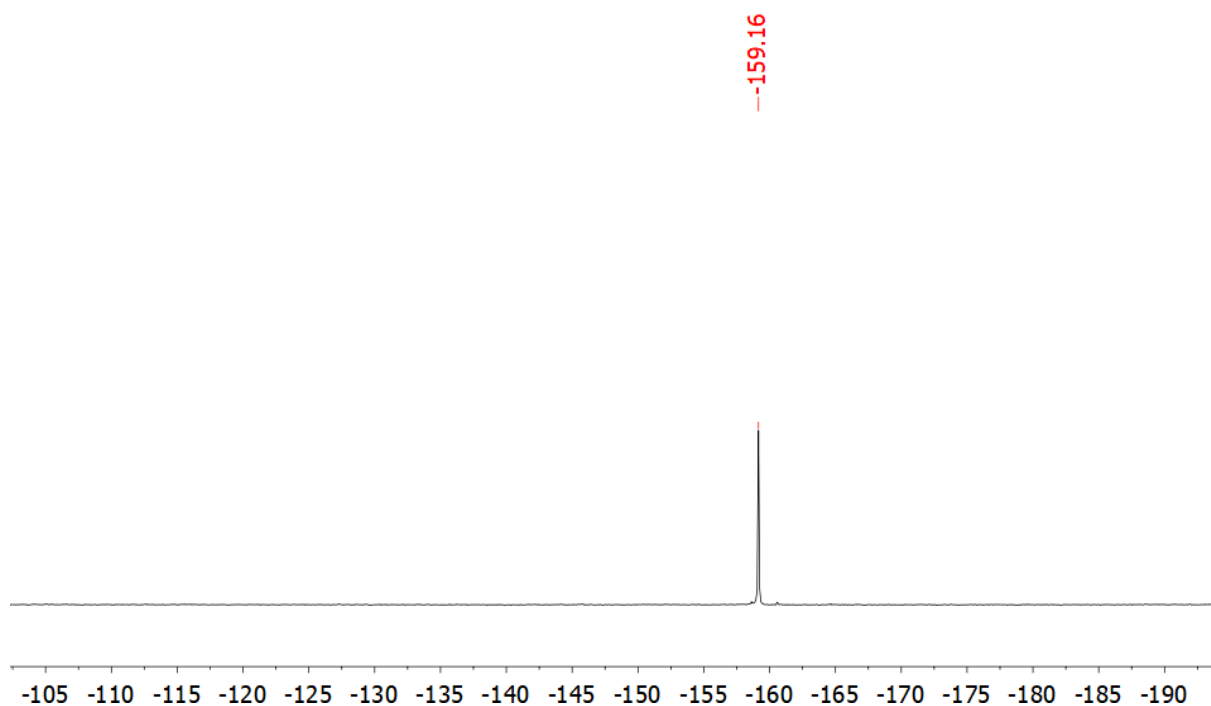

**Figure S40.**  $^{31}\text{P}\{^1\text{H}\}$  NMR spectrum of **1DippSi(H)PHFc** ( $\text{C}_6\text{D}_6$ , 202.3 MHz).

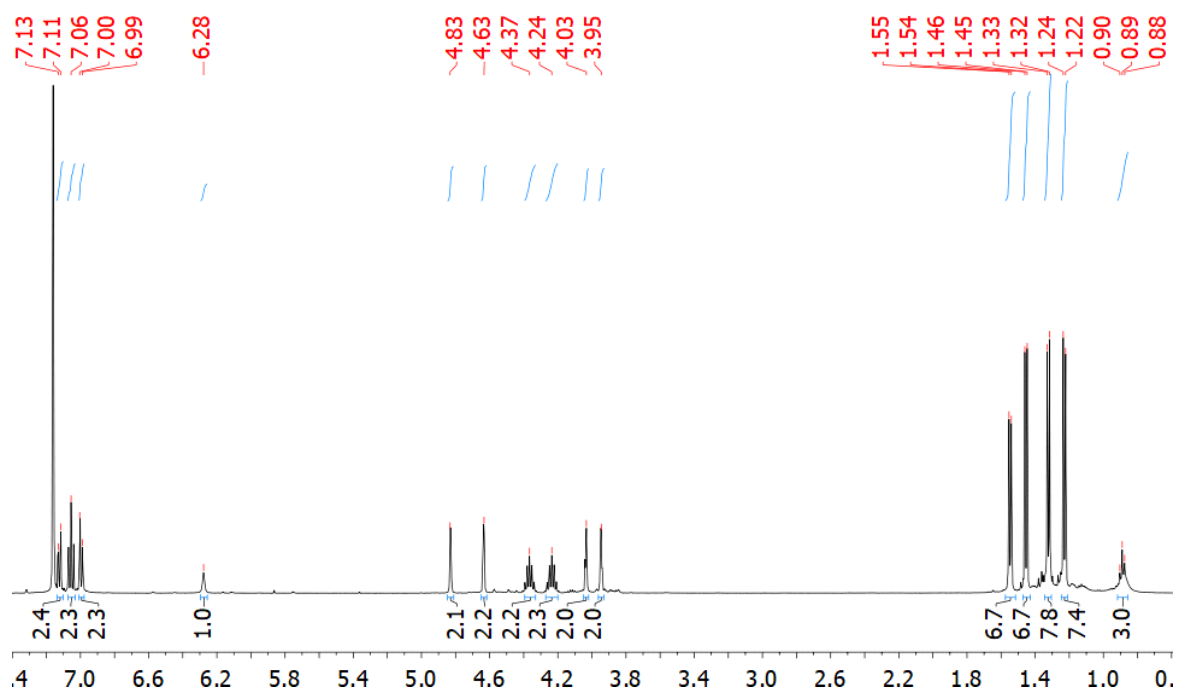

**Figure S41.**  $^1\text{H}$  NMR spectrum of **1DippSi(H)(BH<sub>2</sub>NH<sub>3</sub>)** ( $\text{C}_6\text{D}_6$ , 499.7 MHz).

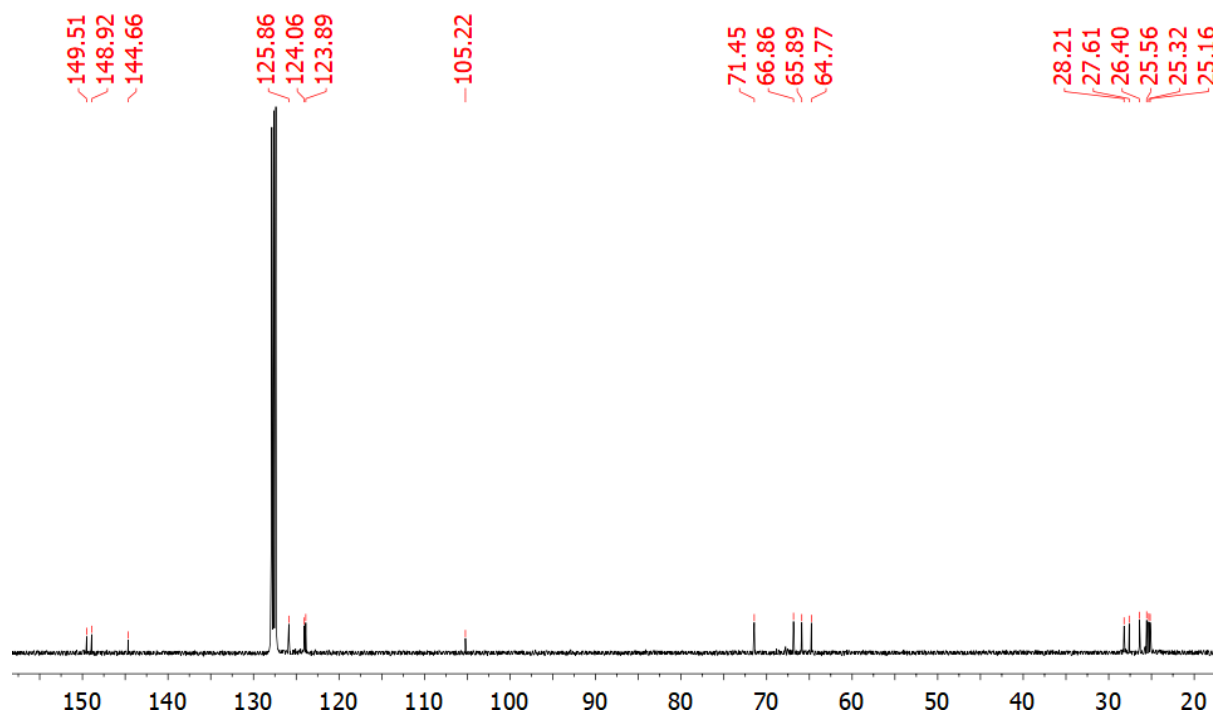

**Figure S42.** <sup>13</sup>C NMR spectrum of **1DippSi(H)(BH<sub>2</sub>NH<sub>3</sub>)** (C<sub>6</sub>D<sub>6</sub>, 100.5 MHz).

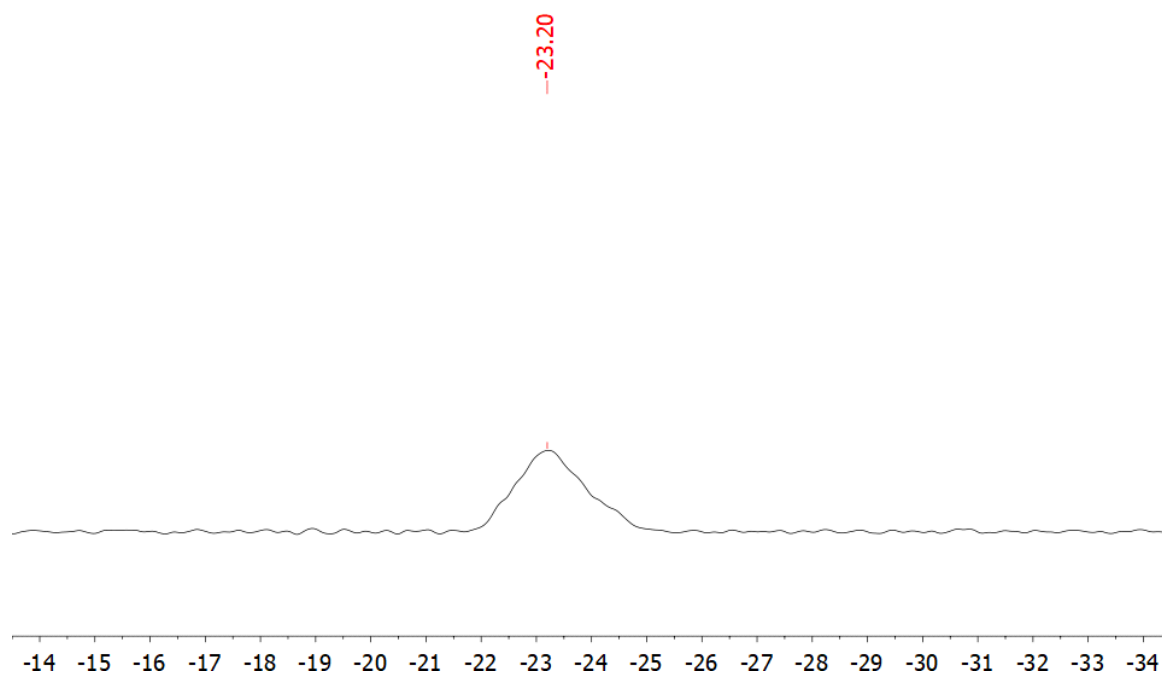

**Figure S43.** <sup>11</sup>B{<sup>1</sup>H} NMR spectrum of **1DippSi(H)(BH<sub>2</sub>NH<sub>3</sub>)** (C<sub>6</sub>D<sub>6</sub>, 160.3 MHz).



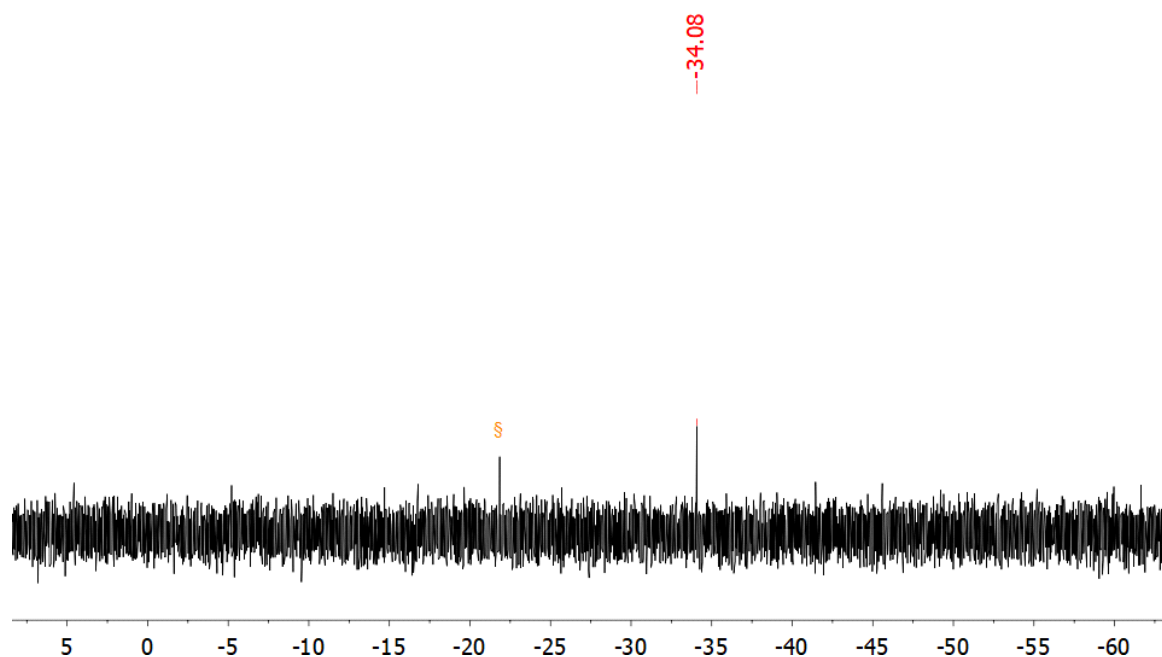

**Figure S44.**  $^{29}\text{Si}\{^1\text{H}\}$  NMR spectrum of crude **1DippSi(H)(BH<sub>2</sub>NH<sub>3</sub>)** (C<sub>6</sub>D<sub>6</sub>, 99.3 MHz). Although data collection for this spectrum took 3 d, the signal of the product could not be detected. Instead, the spectrum reveals weak signals due to silicon grease (§) and another silicon-containing species present in very low concentration, which is assumed to be **1DippSiH<sub>2</sub>**. For comparison, the corresponding signal of the TMS homologue **1TMSSiH<sub>2</sub>** was observed at  $\delta = -44.0$  ppm (see Ref. [S6]). The  $^{29}\text{Si}$  NMR chemical shifts computed (BLYP/TZ2P) for **1DippSiH<sub>2</sub>** (compound **7** according to the computational numbering scheme) and **1TMSSiH<sub>2</sub>** are  $-40.6$  and  $-54.1$  ppm, respectively, while  $\delta = -12.9$  ppm was computed for **1DippSi(H)(BH<sub>2</sub>NH<sub>3</sub>)**.

## II Computational Details

Geometry optimizations and harmonic frequency calculations were performed using the ORCA program package<sup>[S7]</sup> (Version 4.1.2) employing the PBEh-3c density functional composite method<sup>[S8]</sup> combined with a higher integration grid (Grid5) to avoid spurious imaginary frequencies. Optimized structures were characterized as minima or first order saddle points by eigenvalue analysis of the computed Hessians. Connectivities between minima and the corresponding transition states were validated by intrinsic reaction coordinate (IRC) calculations<sup>[S9]</sup> or by displacing the transition-state geometries along both directions of the transition mode, followed by unconstrained optimizations to the respective minima.

For selected structures, relative energies from correlated wavefunction theory were computed on a smaller model system as well as on the full system. For a smaller system with H-truncated nitrogen atoms single-point energies were obtained using the explicitly correlated coupled-cluster ansatz<sup>[S10]</sup> CCSD(T)-F12b<sup>[S11]</sup> as implemented in the Molpro2015.1 program<sup>[S12]</sup> in combination with the F12-optimized correlation consistent polarized triple-zeta orbital<sup>[S13]</sup> and auxiliary<sup>[S14-S16]</sup> basis sets of the cc-pVTZ-F12 family for all non-metal atoms. For the Fe atom, the aug-cc-pVTZ orbital basis<sup>[S13]</sup> was used in conjunction with the universal JKfit option for integral fitting in the Fock matrix construction along with the aug-cc-pVTZ/MP2Fit auxiliary basis used for the many-electron integrals and CABS representation. For the full system single-point energies were obtained from correlated DLPNO-CCSD(T)-F12<sup>[S11, S17]</sup> computations as implemented in ORCA 4.2.1 using the F12-optimized correlation consistent polarized triple-zeta orbital and auxiliary basis sets for non-metal atoms. For the Fe atom, the aug-cc-pVTZ orbital basis and associated auxiliary sets were employed.

Structures for NMR calculations were reoptimized using the Gaussian09, Rev. D.01 program<sup>[S18]</sup> employing the M06-L density functional<sup>[S19]</sup> together with the 6-31+G(d,p) basis set.<sup>[S20, S21]</sup> Based on these geometries, <sup>29</sup>Si NMR chemical shifts were computed relative to tetramethylsilane with the ADF2013.01 program.<sup>[S22-S24]</sup> The BLYP functional<sup>[S25, S26]</sup> was used in these calculations in combination with the TZ2P Slater-type basis set.<sup>[S27]</sup>

Pictures of molecular structures were generated with the Cylview<sup>[S28]</sup> and ChemCraft<sup>[S29]</sup> programs. All energies given are relative free energies at 298.15 K and 1 atm ( $\Delta G^{298}$ ) in kcal mol<sup>-1</sup>.

For convenience, the following Chart shows the numbers of the computed structures for experimentally observed compounds:

|                                               |           |
|-----------------------------------------------|-----------|
| <b>1DippSi</b>                                | <b>1</b>  |
| <b>1DippSiH(NH<sub>2</sub>)</b>               | <b>3</b>  |
| <b>1DippSiH(OH)</b>                           | <b>6</b>  |
| <b>1DippSiH<sub>2</sub></b>                   | <b>7</b>  |
| <b>1DippSiH(BH<sub>2</sub>NH<sub>3</sub>)</b> | <b>10</b> |

Structural Metrics of  $[\text{Fe}\{\eta^5\text{-C}_5\text{H}_4\text{N}(\text{2,6-}i\text{Pr}_2\text{C}_6\text{H}_3)\}_2\text{Si}]$  and the reaction products **3** and **10****Table S2.** Selected metrics of the PBEh-3c optimized and the X-ray structure for **1DippSi**. Hydrogen atoms and isopropyl groups of Dipp substituents are omitted.

|                          | PBEh-3c | exp. X-RAY |
|--------------------------|---------|------------|
| Si–N                     | 1.75 Å  | 1.74 Å     |
| N–Si–N                   | 105°    | 106°       |
| $\Sigma\angle(\text{N})$ | 360°    | 360°       |

**Table S3.** Selected metrics of the PBEh-3c optimized and the X-ray structure for **3**. Carbon-bound hydrogen atoms and isopropyl groups of Dipp substituents omitted.

|                                        | PBEh-3c   | exp. X-RAY   |
|----------------------------------------|-----------|--------------|
| Si–N <sup>Dipp</sup>                   | 1.75 Å    | 1.72, 1.73 Å |
| Si–NH <sub>2</sub>                     | 1.72 Å    | 1.69 Å       |
| N–Si–N                                 | 113°      | 112°         |
| $\Sigma\angle(\text{N}^{\text{Dipp}})$ | 359, 360° | 358°         |

**Table S4.** Selected metrics of the PBEh-3c optimized and X-ray structure for **10**. Carbon-bound hydrogen atoms and isopropyl groups of Dipp substituents omitted.

|                                        | PBEh-3c      | exp. X-RAY   |
|----------------------------------------|--------------|--------------|
| Si–N <sup>Dipp</sup>                   | 1.79, 1.76 Å | 1.77, 1.76 Å |
| Si–B                                   | 2.01 Å       | 2.01 Å       |
| B–N                                    | 1.64 Å       | 1.60 Å       |
| N–Si–N                                 | 109°         | 108°         |
| $\Sigma\angle(\text{N}^{\text{Dipp}})$ | 358, 359°    | 357, 358°    |

### Comparison of frontier molecular orbitals and spin densities

For comparison with **1** HOMO-LUMO gaps and singlet-triplet splittings have been calculated for three experimentally characterized silylenes at the PBEh-3c level of theory. Figure S45 shows the respective Lewis structures, frontier molecular orbitals and spin densities of the triplet state. All energies given are in eV.

As an illustration of the method dependence of the HOMO-LUMO gap we computed the orbital energies of **1** with an exemplary choice of functionals commonly in use (Figure S46). We note a significant reordering of the occupied molecular orbitals obtained with the various methods, and for the difference between the silylene lone pair and the empty p-orbital at Si we obtain values ranging from 3.7 to 9.1 eV.

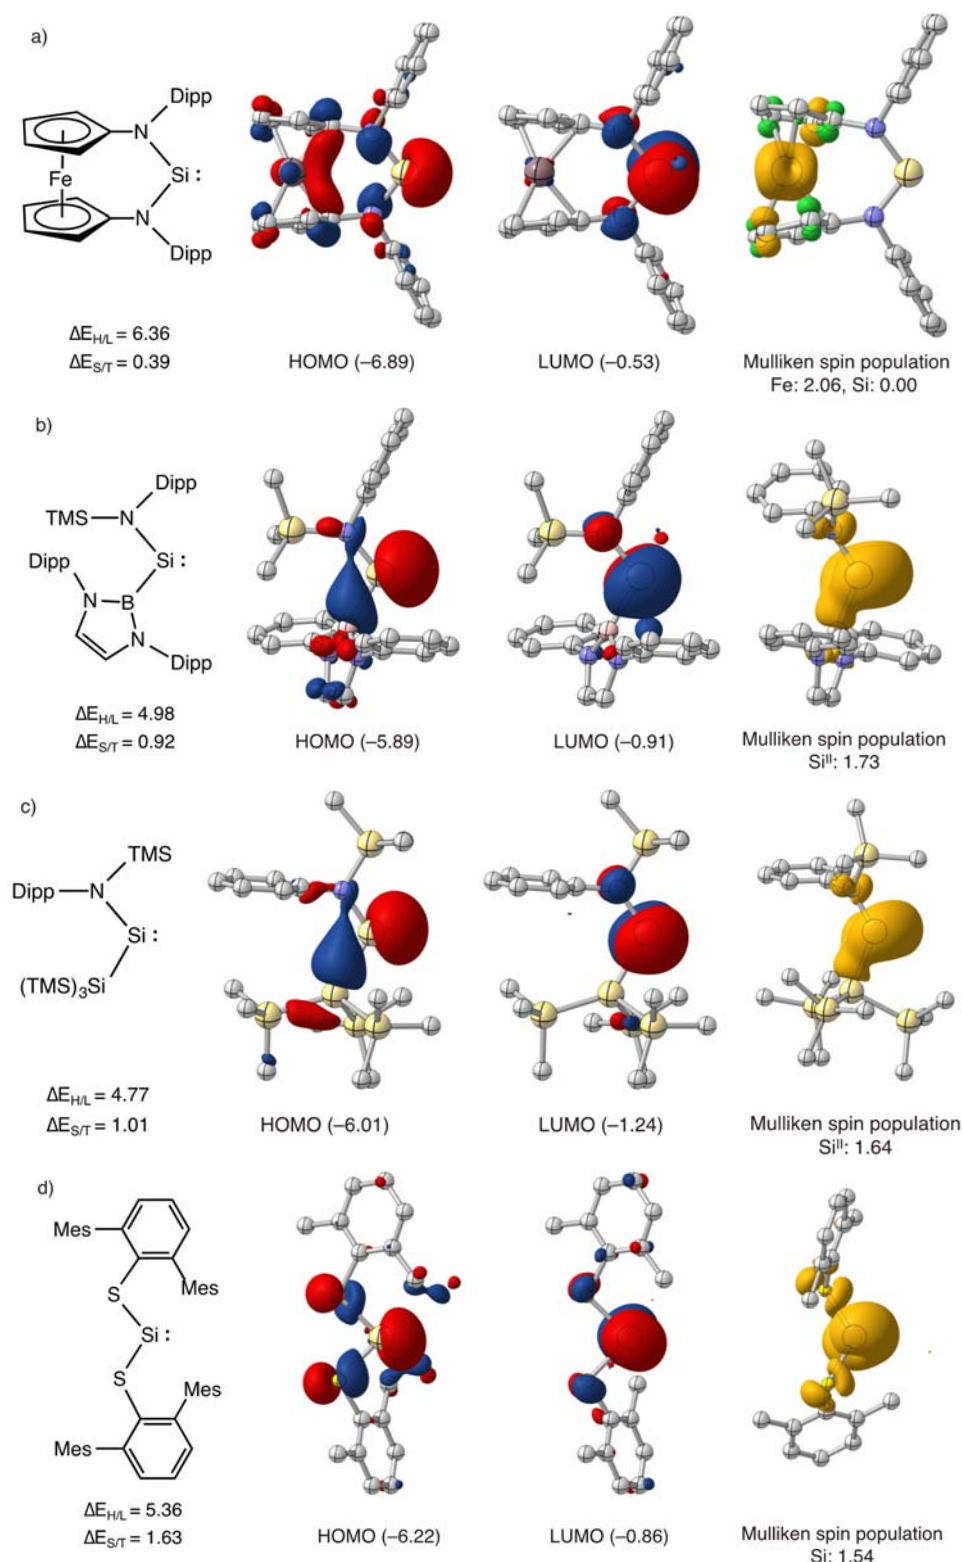

**Figure S45.** Comparison of electronic characteristics for the full molecular models of a) **1** ( $\cong$  **1DippSi**), b) the acyclic silylene  $\text{Si}\{\text{B}(\text{NDippCH}_2)_2\}\{\text{N}(\text{SiMe}_3)\text{Dipp}\}$  of Protchenko *et al.*,<sup>[S30]</sup> c) the acyclic silylene  $\text{Si}\{\text{Si}(\text{SiMe}_3)_3\}\{\text{N}(\text{SiMe}_3)\text{Dipp}\}$  of Protchenko *et al.*<sup>[S31]</sup> and d) the acyclic silylene  $\text{Si}\{\text{S}(\text{C}_6\text{H}_3\text{-}2,6(\text{C}_6\text{H}_2\text{-}2,4,6\text{-Me}_3)_2)\}_2$  of Rekken *et al.*,<sup>[S32]</sup> Lewis structures, frontier molecular orbitals and triplet spin density distributions computed for the full molecular models (orbital energies and singlet-triplet gaps in eV, isocontour surfaces at  $\pm 0.05 a_0^{-3/2}$  for orbitals and  $\pm 0.005 a_0^{-3}$  for the spin density,  $\alpha$  spin: yellow,  $\beta$  spin: green; *iPr* groups, Mes groups and hydrogen atoms not shown)

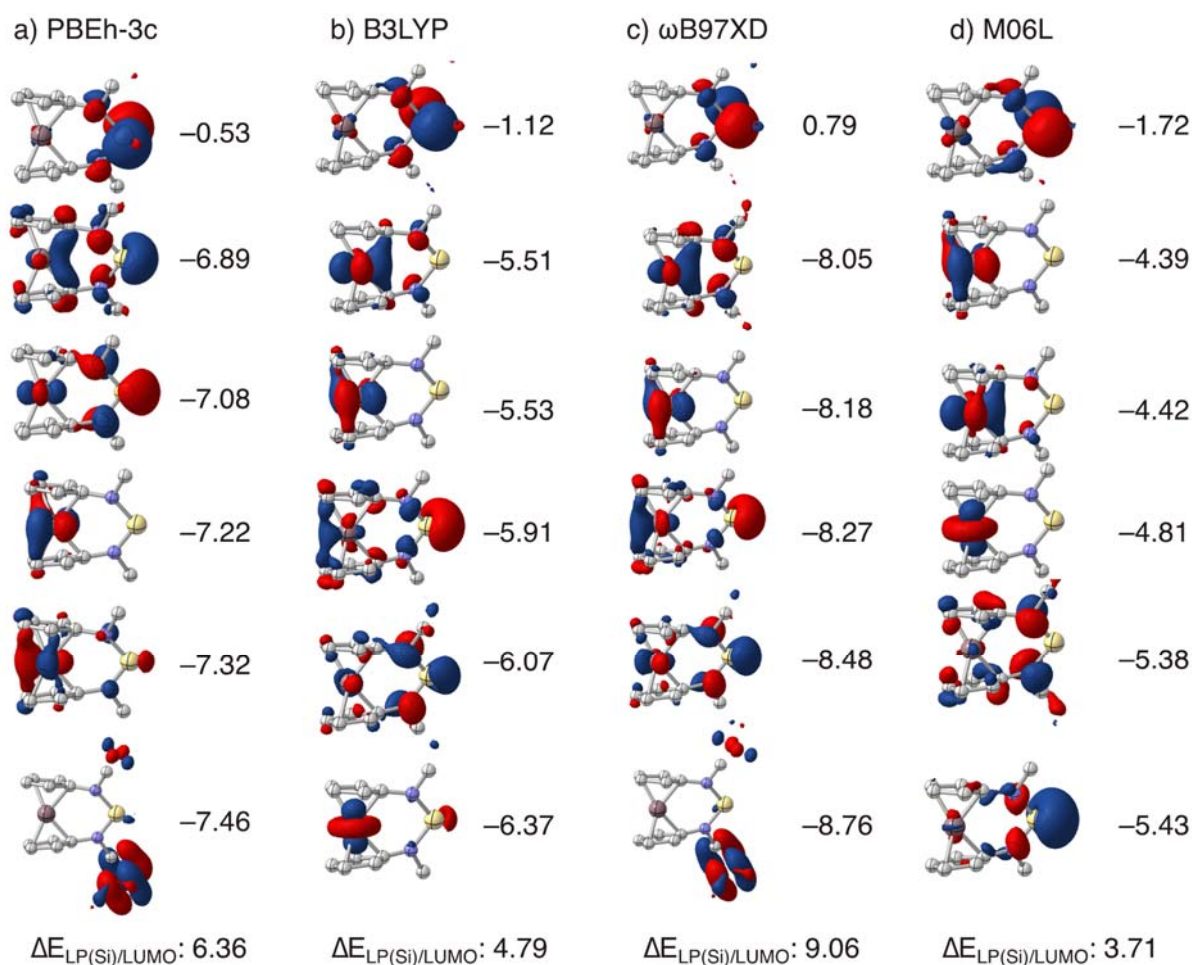

**Figure S46.** Comparison of frontier molecular orbitals calculated with four density functional methods; a) PBEh-3c, b) B3LYP/def2-TZVP,<sup>[S33, S34]</sup> c)  $\omega$ B97XD/def2-TZVP<sup>[S35]</sup> and d) M06L/def2-TZVP<sup>[S19]</sup> (orbital energies in eV, isocontour surfaces at  $\pm 0.05 a_0^{-3/2}$ ; Dipp groups are indicated by the *ipso*-C atom, hydrogen atoms not shown).

### Evaluation of the PBEh-3c method for the full and the H-truncated molecular system

The PBEh-3c method has primarily been designed for the efficient assessment of molecular structures but it also provides reasonable relative energies with respect to benchmark databases.<sup>[S8]</sup> To test the suitability of PBEh-3c for the reactions investigated here, the thermochemistry for two representative reactions were compared to single-point energies from correlated wavefunction theory (Schemes S1 and S2). Unless stated otherwise in the following, relative free energies  $\Delta G^{298}$  are given in kcal mol<sup>-1</sup> (imaginary wave numbers of transition modes in parentheses, cm<sup>-1</sup>). Bonds formed or broken in transition states are shown dashed, unreactive H atoms are omitted and the orientation of Dipp-substituents in transition state structures are indicated by showing the C<sub>ipso</sub> atom only.

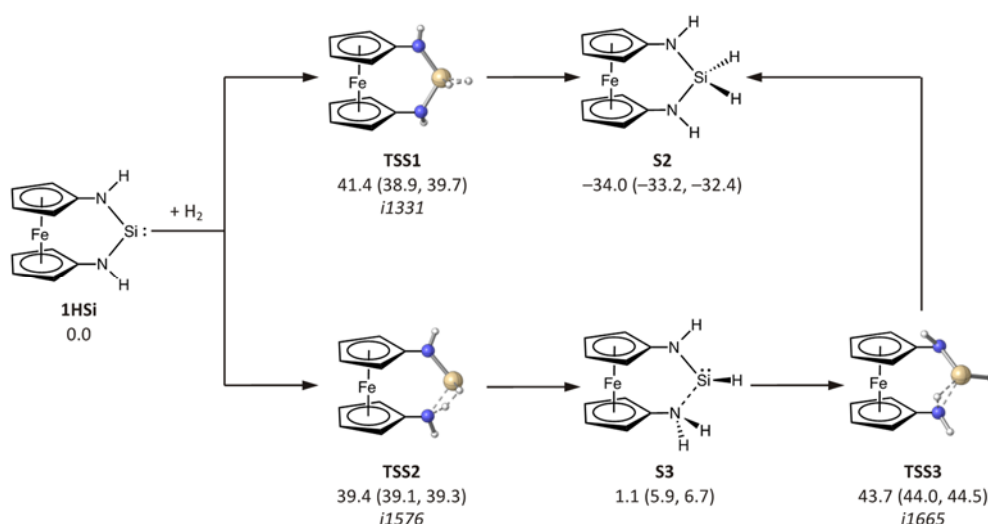

**Scheme S1.** Computed reaction paths for the H–H bond insertion in the H-truncated molecular model **1HSi**; PBEh-3c relative total energies  $\Delta E$  in kcal mol<sup>-1</sup> (CCSD(T)-F12b/cc-pVTZ//PBEh-3c, DLPNO-CCSD(T)-F12/cc-pVTZ//PBEh-3c in parentheses, in this order).

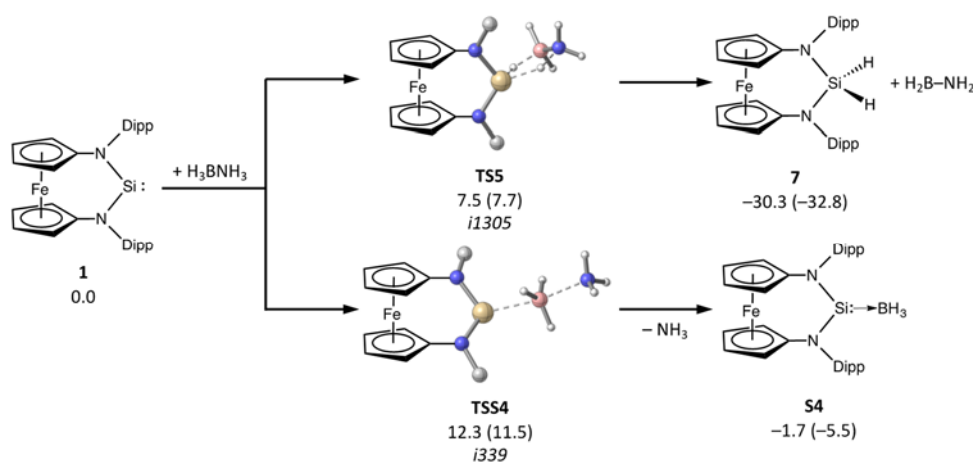

**Scheme S2.** Computed reaction paths for the initial reaction of **1** with H<sub>3</sub>BNH<sub>3</sub> employing the full molecular model; PBEh-3c relative total energies  $\Delta E$  in kcal mol<sup>-1</sup>, DLPNO-CCSD(T)-F12/cc-pVTZ//PBEh-3c results in parentheses).

### Additional Information on reaction paths investigated

The silylene **1DippSi** does not react with H<sub>2</sub> to the corresponding silane, which is in line with reaction barriers above 50 kcal mol<sup>-1</sup> calculated for **1** for both addition pathways identified (Scheme S3).

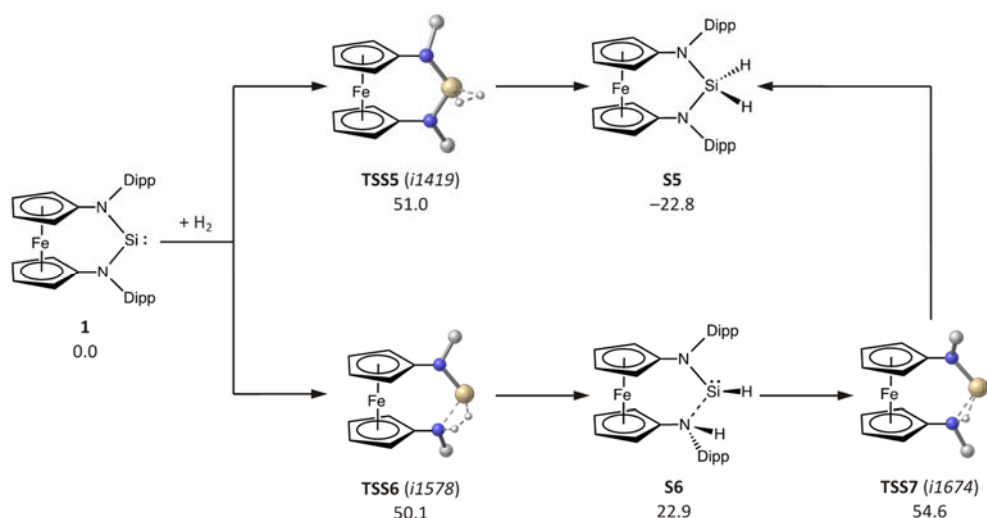

**Scheme S3.** Computed reaction paths for the H–H bond insertion by **1**.

For the reaction of **1** with H<sub>2</sub>O multiple paths involving one or two additional H<sub>2</sub>O molecules acting as proton shuttles were investigated. For the rate determining transition state of the most favorable path the corresponding kinetic isotope effect was calculated. In order to estimate the effect of hydrogen tunneling, a 1-D Wigner correction<sup>[S36]</sup> was applied. The direct oxidative addition of water to **1** is kinetically least favorable (Scheme S4 path d) while O–H addition across a Si–N bond with subsequent proton shift is effectively catalyzed by a proton-shuttle mechanism with additional water molecules (Scheme S4, a-c and Scheme 3 in the main text).

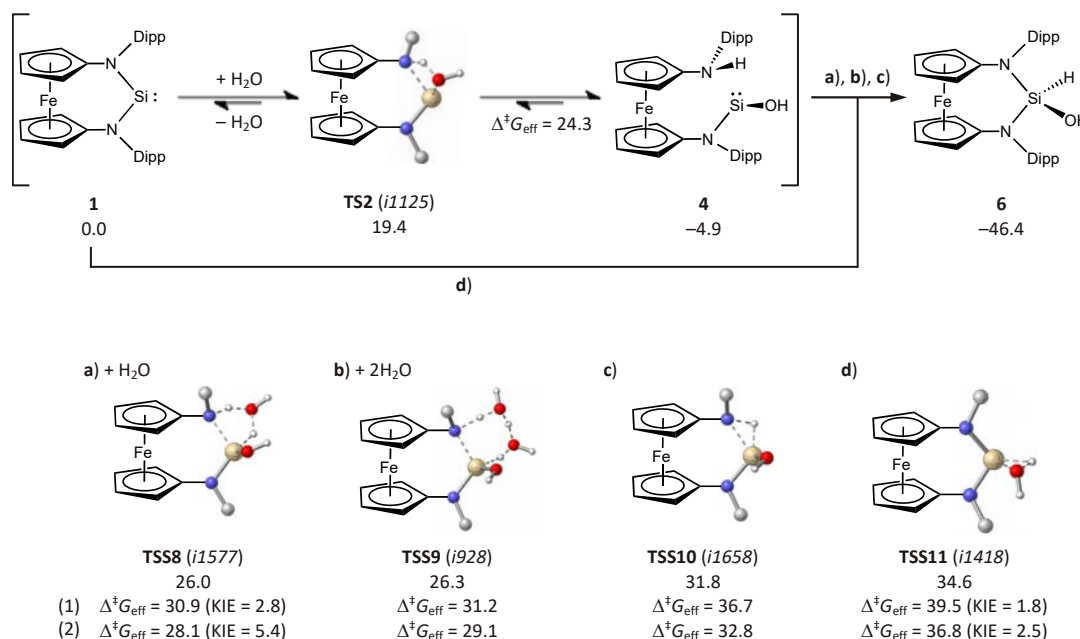

**Scheme S4.** Computed reaction paths for water addition by **1DippSi**, (1) effective reaction barriers relative to **4** and (2) including 1-D Wigner correction<sup>[S36]</sup> for tunneling effects.

Alternatively, the formation of silanone **5** from **4** through a proton shift and rearrangement to **6** was examined (Scheme S5, a-c).



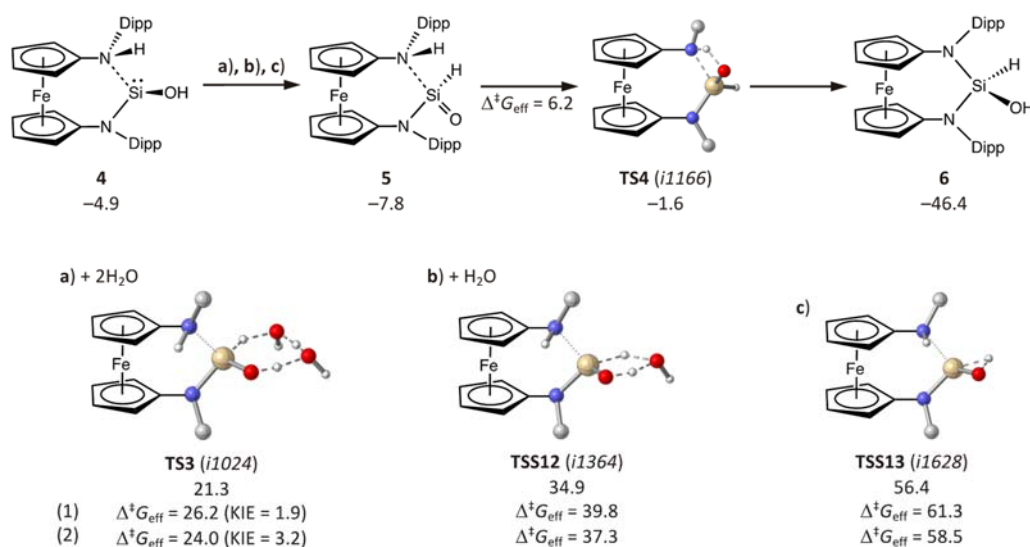

**Scheme S5.** Computed isomerization paths for **4** to **6**, (1) effective reaction barriers relative to **4** and (2) including 1-D Wigner correction<sup>[S36]</sup> for tunneling effects.

Overall the application of the 1-D Wigner correction lowers activation barriers by ca. 2-3 kcal mol<sup>-1</sup> (Schemes S4 and S5). This is accompanied with an increase of the predicted KIEs (Scheme S4a).

As for the reaction with H<sub>2</sub>O, two pathways, i.e. direct N–H bond insertion as well as N–H bond addition across an N–Si bond of **1**, were examined for ammonia and, as before, proton shuttling involving an additional NH<sub>3</sub> molecule reduces the activation barrier substantially (Scheme S6).

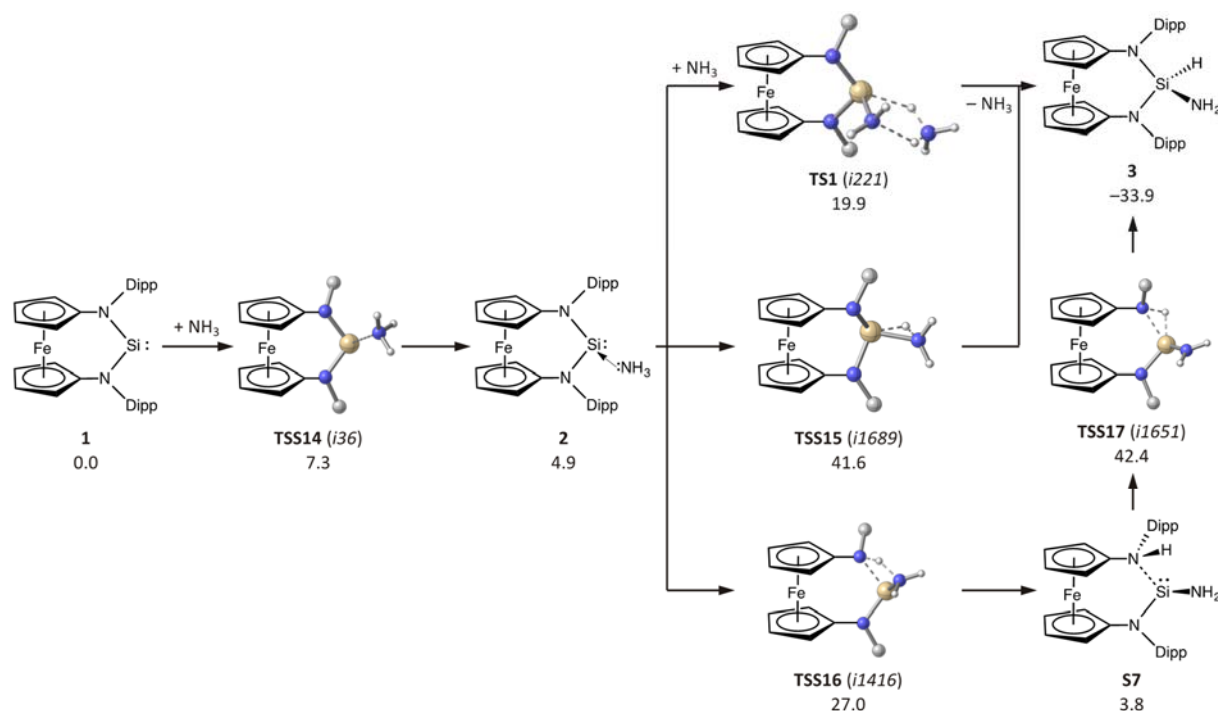

**Scheme S6.** Computed reaction paths for the N–H bond cleavage in NH<sub>3</sub> by **1** and subsequent hydrogen migration.

A reaction involving the silamine **S8** can clearly be ruled out because of the very high computed activation barrier of 76 kcal mol<sup>-1</sup> (Scheme S7).

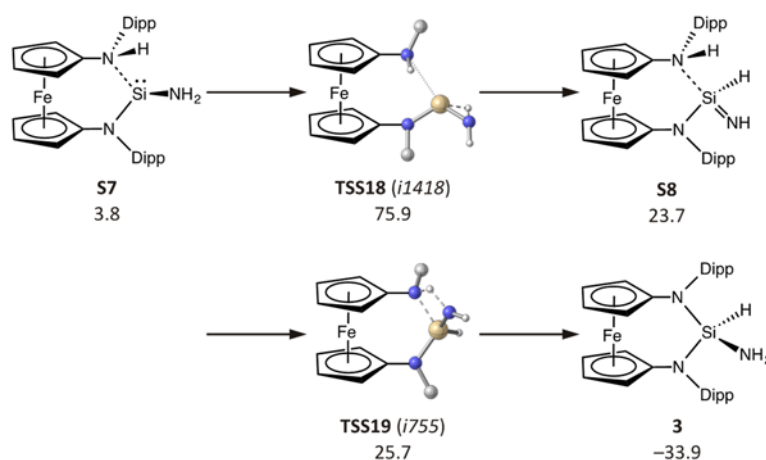

**Scheme S7.** Computed isomerization path for **S7** to **3**.

For the reaction of **1** with H<sub>3</sub>BNH<sub>3</sub> both, insertion into an N–H or a B–H bond, are kinetically strongly disfavored (Scheme S8).

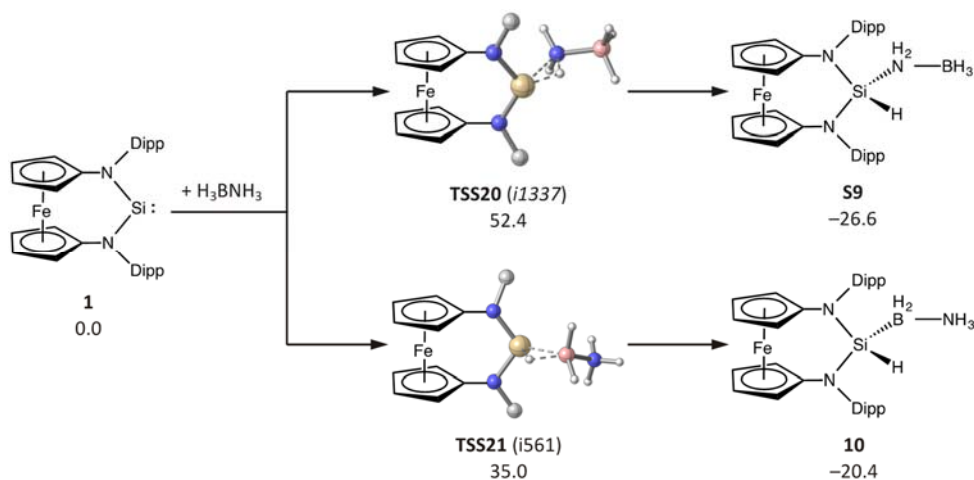

**Scheme S8.** Computed reaction paths for the direct B/N–H bond insertion in H<sub>3</sub>BNH<sub>3</sub> by **1**.

In contrast to expectation silane **7** is not the primary product of the reaction of **1** with H<sub>3</sub>BNH<sub>3</sub>. Extrusion of H<sub>2</sub>BNH<sub>2</sub> from **10** is hindered by an unreasonably high effective barrier of 47 kcal mol<sup>-1</sup> (Scheme S9).

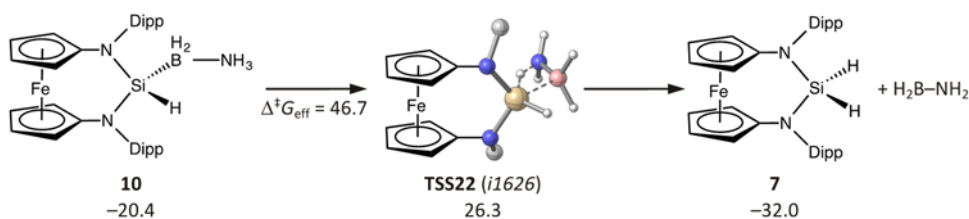

**Scheme S9.** Computed reaction path for the release of H<sub>2</sub>BNH<sub>2</sub> from **10**, effective barrier relative to **10**.

Further, reaction of  $\text{H}_3\text{BNH}_3$  with the partial Si–N double bond was examined (Scheme S10). For either orientation the computed barrier is too high for an efficient reaction at room temperature.

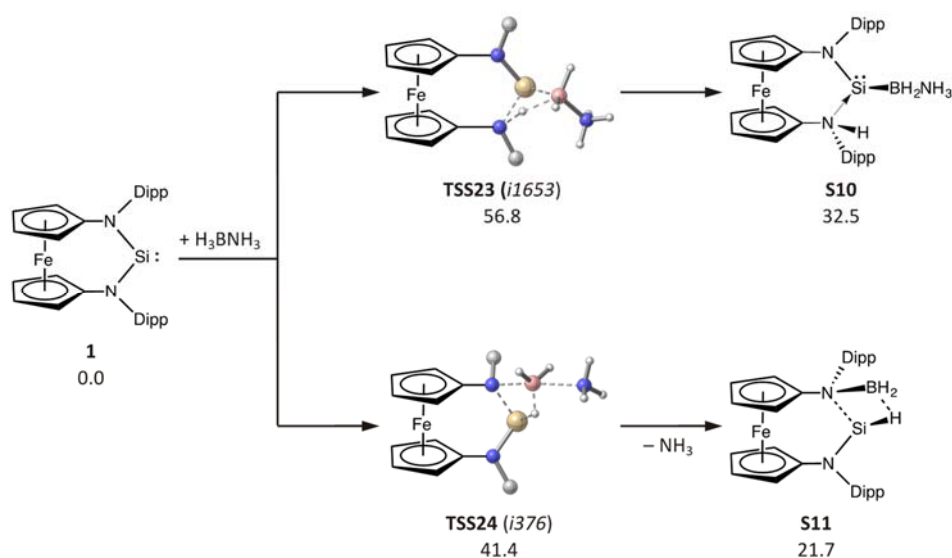

**Scheme S10.** Computed reaction paths for the B–H bond cleavage in  $\text{H}_3\text{BNH}_3$  by the Si–N bond in **1**.

Alternatively, we investigated an  $\text{S}_\text{N}$ -like reaction of  $\text{H}_3\text{BNH}_3$  with **1** (Scheme S11). After formation of the borane adduct **S12** reversible coordination of ammonia leads to the push-pull-stabilized silylene **S13**. Alternatively, the silylene can insert in a B–H bond in **S12** and subsequent coordination of ammonia leads to **10**. With reference to **S13**, this sequence has an effective barrier of  $24 \text{ kcal mol}^{-1}$  and cannot compete with the initial dehydrogenation scenario shown in the main text (Scheme 4).

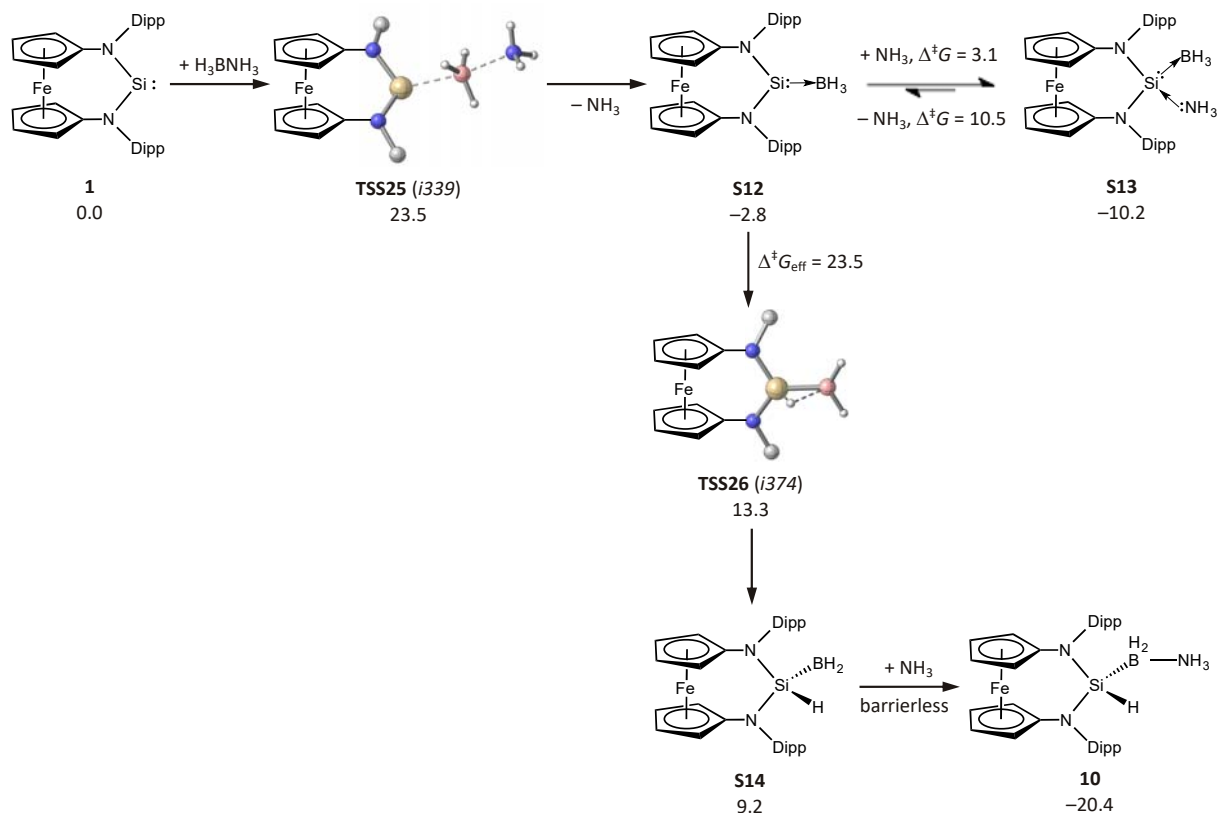

**Scheme S11.** Computed reaction paths for the  $\text{S}_{\text{N}}$ -like reaction of  $\text{H}_3\text{BNH}_3$  with **1**.

Finally, following a reviewer's suggestion, we elucidated the role of the  $\text{BH}_3$  adduct **S12** as resting state in the catalytic cycle sketched in Scheme S12: low-barrier B–H insertion leads to **S14** and  $\text{NH}_3$  transfer from  $\text{H}_3\text{BNH}_3$  yields the product **10**. The catalytic cycle is closed by regeneration of **S12** with another equivalent of **1** and the liberated  $\text{BH}_3$ . The rate-limiting ammonia transfer via **TSS27** is, however, connected with a prohibitively high activation barrier of  $30 \text{ kcal mol}^{-1}$ . Hence this scenario cannot compete with the initial dehydrogenation of  $\text{H}_3\text{BNH}_3$  by **1** (Scheme 4 in the main text).

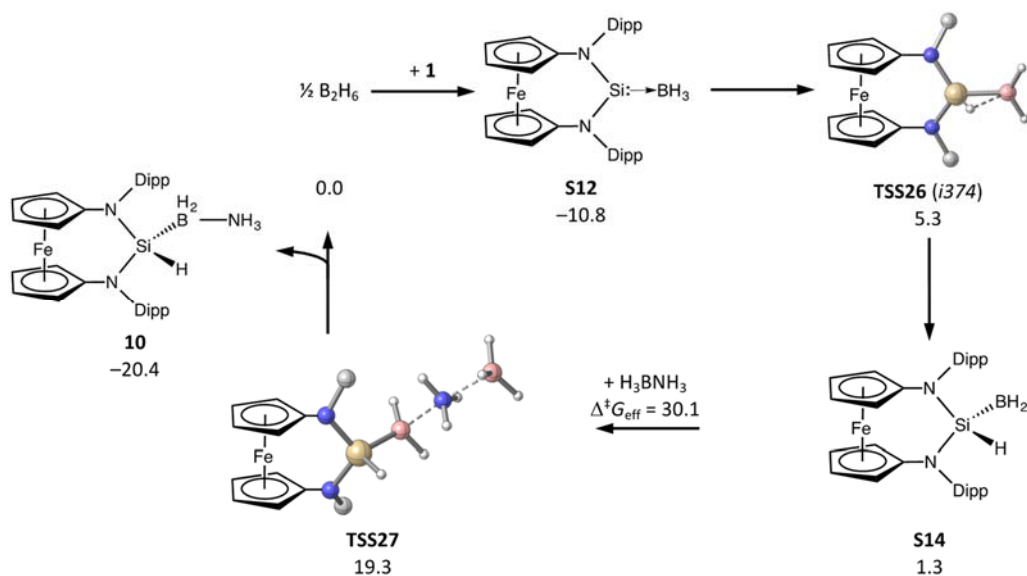

**Scheme S12.** Computed reaction path for the reaction of  $\text{B}_2\text{H}_6$  with **1**.

### Cartesian coordinates

Compound (point group): total energy/Hartree (PBEh-3c)

|                                                               |          |          |          |                                                            |          |          |          |
|---------------------------------------------------------------|----------|----------|----------|------------------------------------------------------------|----------|----------|----------|
| <b>1 (C<sub>2</sub>): E<sub>tot</sub> = -2979.40853194</b>    |          |          |          |                                                            |          |          |          |
| C                                                             | 4.87836  | 17.81194 | 1.95428  | H                                                          | 5.91114  | 18.81908 | 6.40683  |
| C                                                             | 3.99092  | 18.65654 | 1.22975  | C                                                          | 6.58768  | 20.49949 | 7.52317  |
| H                                                             | 2.93130  | 18.76284 | 1.41570  | H                                                          | 6.53960  | 21.20369 | 6.69255  |
| C                                                             | 4.74685  | 19.35782 | 0.25862  | H                                                          | 7.61446  | 20.13668 | 7.59832  |
| H                                                             | 4.36163  | 20.08665 | -0.43869 | H                                                          | 6.36581  | 21.04888 | 8.43992  |
| C                                                             | 6.09282  | 18.92579 | 0.35392  | C                                                          | 5.72192  | 18.31477 | 8.45188  |
| H                                                             | 6.91412  | 19.27030 | -0.25638 | H                                                          | 5.49364  | 18.75288 | 9.42473  |
| C                                                             | 6.17773  | 17.96968 | 1.39304  | H                                                          | 6.73437  | 17.91090 | 8.50704  |
| H                                                             | 7.07257  | 17.45899 | 1.71659  | H                                                          | 5.03698  | 17.48130 | 8.29370  |
| C                                                             | 4.95740  | 20.01912 | 4.07211  | Fe                                                         | 5.45522  | 19.71564 | 2.16061  |
| C                                                             | 4.50328  | 21.12012 | 3.29029  | N                                                          | 4.53967  | 16.99393 | 3.05340  |
| H                                                             | 3.47656  | 21.43371 | 3.17451  | N                                                          | 4.14424  | 19.12448 | 4.80349  |
| C                                                             | 5.62899  | 21.71541 | 2.67521  | Si                                                         | 3.87163  | 17.40287 | 4.62251  |
| H                                                             | 5.60958  | 22.56533 | 2.00962  | N                                                          | 1.44357  | -0.01023 | 0.24715  |
| C                                                             | 6.78342  | 20.99896 | 3.07638  | N                                                          | -1.40790 | -0.08869 | 0.13310  |
| H                                                             | 7.79823  | 21.20806 | 2.77260  | Si                                                         | -0.02833 | 0.13213  | 1.18945  |
| C                                                             | 6.37553  | 19.96630 | 3.95557  | H                                                          | 0.01127  | -0.88403 | 2.27677  |
| H                                                             | 7.02013  | 19.23931 | 4.42905  | <b>2 (C<sub>1</sub>): E<sub>tot</sub> = -3035.85190114</b> |          |          |          |
| C                                                             | 4.73190  | 15.59033 | 2.83797  | C                                                          | -0.92607 | 1.11377  | 1.26004  |
| C                                                             | 3.76181  | 14.85549 | 2.14084  | C                                                          | 0.17341  | 1.67804  | 1.97121  |
| C                                                             | 3.97823  | 13.49799 | 1.93618  | H                                                          | 1.07929  | 2.06001  | 1.52292  |
| H                                                             | 3.24438  | 12.91525 | 1.39285  | C                                                          | -0.09835 | 1.60197  | 3.35816  |
| C                                                             | 5.11062  | 12.87259 | 2.42510  | H                                                          | 0.55478  | 1.93254  | 4.15212  |
| H                                                             | 5.25876  | 11.81296 | 2.26262  | C                                                          | -1.37889 | 1.01831  | 3.52175  |
| C                                                             | 6.04945  | 13.60394 | 3.12814  | H                                                          | -1.87274 | 0.82409  | 4.46235  |
| H                                                             | 6.92726  | 13.10191 | 3.51601  | C                                                          | -1.89071 | 0.71842  | 2.23775  |
| C                                                             | 5.88583  | 14.96906 | 3.34042  | H                                                          | -2.83736 | 0.24009  | 2.04125  |
| C                                                             | 2.49728  | 15.49060 | 1.60711  | C                                                          | -1.74893 | 2.06222  | -0.75867 |
| H                                                             | 2.43347  | 16.50419 | 2.00338  | C                                                          | -1.07238 | 3.21196  | -1.21024 |
| C                                                             | 2.54097  | 15.59044 | 0.08241  | C                                                          | -1.80548 | 4.25974  | -1.75873 |
| H                                                             | 3.41135  | 16.15501 | -0.25181 | H                                                          | -1.28829 | 5.15008  | -2.09480 |
| H                                                             | 1.64904  | 16.09157 | -0.29815 | C                                                          | -3.17848 | 4.19736  | -1.88369 |
| H                                                             | 2.58616  | 14.60174 | -0.37820 | H                                                          | -3.72883 | 5.02597  | -2.30984 |
| C                                                             | 1.24463  | 14.75585 | 2.08296  | C                                                          | -3.83864 | 3.06161  | -1.46111 |
| H                                                             | 1.18393  | 13.74147 | 1.68581  | H                                                          | -4.91612 | 3.00885  | -1.56427 |
| H                                                             | 0.34834  | 15.28466 | 1.75467  | C                                                          | -3.14923 | 1.99117  | -0.90111 |
| H                                                             | 1.21548  | 14.68980 | 3.17075  | C                                                          | 0.42825  | 3.38940  | -1.13043 |
| C                                                             | 6.94184  | 15.72194 | 4.12430  | H                                                          | 0.87248  | 2.46068  | -0.76842 |
| H                                                             | 6.74847  | 16.79103 | 4.01756  | C                                                          | 1.02124  | 3.66112  | -2.51278 |
| C                                                             | 6.85817  | 15.38586 | 5.61413  | H                                                          | 0.62676  | 4.57777  | -2.95345 |
| H                                                             | 5.86861  | 15.60486 | 6.01864  | H                                                          | 0.80518  | 2.83881  | -3.19471 |
| H                                                             | 7.58944  | 15.96185 | 6.18492  | H                                                          | 2.10386  | 3.77378  | -2.45294 |
| H                                                             | 7.05603  | 14.32735 | 5.79194  | C                                                          | 0.79947  | 4.49830  | -0.14467 |
| C                                                             | 8.35183  | 15.46976 | 3.59103  | H                                                          | 1.88357  | 4.56399  | -0.03107 |
| H                                                             | 8.67396  | 14.43973 | 3.74961  | H                                                          | 0.36526  | 4.32054  | 0.83912  |
| H                                                             | 9.07062  | 16.11245 | 4.10174  | H                                                          | 0.44814  | 5.47321  | -0.48765 |
| H                                                             | 8.42065  | 15.67180 | 2.52148  | C                                                          | -3.97127 | 0.79662  | -0.46899 |
| C                                                             | 3.49673  | 19.70917 | 5.94153  | H                                                          | -3.28703 | 0.04933  | -0.06568 |
| C                                                             | 2.16483  | 20.13695 | 5.83334  | C                                                          | -4.72279 | 0.17385  | -1.64947 |
| C                                                             | 1.55822  | 20.70456 | 6.94891  | H                                                          | -4.07462 | -0.00291 | -2.51067 |
| H                                                             | 0.52823  | 21.03414 | 6.89007  | H                                                          | -5.52020 | 0.82815  | -2.00386 |
| C                                                             | 2.24733  | 20.85695 | 8.13762  | H                                                          | -5.18684 | -0.77301 | -1.36582 |
| H                                                             | 1.76129  | 21.30800 | 8.99287  | C                                                          | -4.96292 | 1.16422  | 0.63698  |
| C                                                             | 3.55574  | 20.42054 | 8.23298  | H                                                          | -5.47111 | 0.27556  | 1.01753  |
| H                                                             | 4.08424  | 20.53105 | 9.17221  | H                                                          | -5.73212 | 1.84479  | 0.26897  |
| C                                                             | 4.19827  | 19.83247 | 7.14956  | H                                                          | -4.46681 | 1.65765  | 1.47149  |
| C                                                             | 1.35417  | 19.96485 | 4.56519  | Fe                                                         | -0.13790 | -0.26542 | 4.48997  |
| H                                                             | 2.03434  | 19.68344 | 3.75933  | N                                                          | -1.02847 | 0.98307  | -0.14423 |
| C                                                             | 0.65959  | 21.25685 | 4.13645  | Si                                                         | -0.09397 | -0.07656 | -1.27289 |
| H                                                             | -0.11666 | 21.55994 | 4.84037  | C                                                          | 0.68102  | -1.50883 | 1.14845  |
| H                                                             | 0.17808  | 21.12462 | 3.16631  | C                                                          | -0.44417 | -2.13427 | 1.76278  |
| H                                                             | 1.36438  | 22.08501 | 4.05278  | H                                                          | -1.34068 | -2.47823 | 1.26688  |
| C                                                             | 0.34169  | 18.82934 | 4.72408  | C                                                          | -0.21060 | -2.20757 | 3.15893  |
| H                                                             | 0.83429  | 17.89001 | 4.98034  | H                                                          | -0.88833 | -2.61504 | 3.89437  |
| H                                                             | -0.21843 | 18.67502 | 3.79977  | C                                                          | 1.07198  | -1.66539 | 3.41519  |
| H                                                             | -0.37685 | 19.04785 | 5.51599  | H                                                          | 1.54351  | -1.58229 | 4.38297  |
| C                                                             | 1.62288  | -1.24002 | 2.18413  | C                                                          | 1.62288  | -1.24002 | 2.18413  |
| H                                                             | 2.58548  | -0.77115 | 2.04677  | H                                                          | 2.58548  | -0.77115 | 2.04677  |
| C                                                             | 1.99749  | -1.80003 | -0.80027 | C                                                          | 1.99749  | -1.80003 | -0.80027 |
| C                                                             | 1.93868  | -3.15886 | -1.15774 | C                                                          | 1.93868  | -3.15886 | -1.15774 |
| C                                                             | 3.05291  | -3.76171 | -1.72840 | C                                                          | 3.05291  | -3.76171 | -1.72840 |
| H                                                             | 3.01457  | -4.81000 | -2.00068 | H                                                          | 3.01457  | -4.81000 | -2.00068 |
| C                                                             | 4.21283  | -3.04620 | -1.95902 | C                                                          | 4.21283  | -3.04620 | -1.95902 |
| H                                                             | 5.07027  | -3.52597 | -2.41261 | H                                                          | 5.07027  | -3.52597 | -2.41261 |
| C                                                             | 4.26920  | -1.71461 | -1.59706 | C                                                          | 4.26920  | -1.71461 | -1.59706 |
| H                                                             | 5.18357  | -1.15995 | -1.77074 | H                                                          | 5.18357  | -1.15995 | -1.77074 |
| C                                                             | 3.18399  | -1.07593 | -1.00421 | C                                                          | 3.18399  | -1.07593 | -1.00421 |
| C                                                             | 0.70738  | -4.00489 | -0.92121 | C                                                          | 0.70738  | -4.00489 | -0.92121 |
| H                                                             | -0.08000 | -3.35201 | -0.54947 | H                                                          | -0.08000 | -3.35201 | -0.54947 |
| C                                                             | 0.20079  | -4.65180 | -2.21100 | C                                                          | 0.20079  | -4.65180 | -2.21100 |
| H                                                             | 0.90491  | -5.38578 | -2.60466 | H                                                          | 0.90491  | -5.38578 | -2.60466 |
| H                                                             | 0.04545  | -3.91216 | -2.99999 | H                                                          | 0.04545  | -3.91216 | -2.99999 |
| H                                                             | -0.74221 | -5.17499 | -2.03860 | H                                                          | -0.74221 | -5.17499 | -2.03860 |
| C                                                             | 0.95704  | -5.05084 | 0.16440  | C                                                          | 0.95704  | -5.05084 | 0.16440  |
| H                                                             | 0.05236  | -5.62868 | 0.36396  | H                                                          | 0.05236  | -5.62868 | 0.36396  |
| H                                                             | 1.26394  | -4.57604 | 1.09602  | H                                                          | 1.26394  | -4.57604 | 1.09602  |
| H                                                             | 1.73941  | -5.75282 | -0.12938 | H                                                          | 1.73941  | -5.75282 | -0.12938 |
| C                                                             | 3.34451  | 0.37347  | -0.60165 | C                                                          | 3.34451  | 0.37347  | -0.60165 |
| H                                                             | 2.44093  | 0.68207  | -0.07116 | H                                                          | 2.44093  | 0.68207  | -0.07116 |
| C                                                             | 3.49633  | 1.26675  | -1.83031 | C                                                          | 3.49633  | 1.26675  | -1.83031 |
| H                                                             | 2.63296  | 1.17426  | -2.48843 | H                                                          | 2.63296  | 1.17426  | -2.48843 |
| H                                                             | 4.38794  | 1.00587  | -2.40352 | H                                                          | 4.38794  | 1.00587  | -2.40352 |
| H                                                             | 3.59055  | 2.31357  | -1.53602 | H                                                          | 3.59055  | 2.31357  | -1.53602 |
| C                                                             | 4.52293  | 0.57318  | 0.35306  | C                                                          | 4.52293  | 0.57318  | 0.35306  |
| H                                                             | 4.55113  | 1.60361  | 0.71145  | H                                                          | 4.55113  | 1.60361  | 0.71145  |
| H                                                             | 5.47908  | 0.37414  | -0.13342 | H                                                          | 5.47908  | 0.37414  | -0.13342 |
| H                                                             | 4.46081  | -0.08210 | 1.22232  | H                                                          | 4.46081  | -0.08210 | 1.22232  |
| N                                                             | 0.85526  | -1.17543 | -0.20754 | N                                                          | 0.85526  | -1.17543 | -0.20754 |
| N                                                             | -1.70187 | -1.50301 | -1.53444 | N                                                          | -1.70187 | -1.50301 | -1.53444 |
| H                                                             | -2.42683 | -1.07375 | -2.09701 | H                                                          | -2.42683 | -1.07375 | -2.09701 |
| H                                                             | -2.13238 | -1.84096 | -0.68112 | H                                                          | -2.13238 | -1.84096 | -0.68112 |
| H                                                             | -1.34043 | -2.29958 | -2.04743 | H                                                          | -1.34043 | -2.29958 | -2.04743 |
| <b>3 (C<sub>1</sub>): E<sub>tot</sub> = -3035.91032832349</b> |          |          |          |                                                            |          |          |          |
| C                                                             | 1.63675  | -1.12846 | -0.58265 | C                                                          | 1.63675  | -1.12846 | -0.58265 |
| C                                                             | 2.15691  | -1.09973 | -1.90638 | C                                                          | 2.15691  | -1.09973 | -1.90638 |
| H                                                             | 2.55238  | -0.22916 | -2.40706 | H                                                          | 2.55238  | -0.22916 | -2.40706 |
| C                                                             | 2.06468  | -2.40597 | -2.44463 | C                                                          | 2.06468  | -2.40597 | -2.44463 |
| H                                                             | 2.37483  | -2.70464 | -3.43464 | H                                                          | 2.37483  | -2.70464 | -3.43464 |
| C                                                             | 1.48604  | -3.24723 | -1.46434 | C                                                          | 1.48604  | -3.24723 | -1.46434 |
| H                                                             | 1.28035  | -4.30179 | -1.57182 | H                                                          | 1.28035  | -4.30179 | -1.57182 |
| C                                                             | 1.24437  | -2.46828 | -0.30462 | C                                                          | 1.24437  | -2.46828 | -0.30462 |
| H                                                             | 0.80926  | -2.82310 | 0.61970  | H                                                          | 0.80926  | -2.82310 | 0.61970  |
| C                                                             | -1.37435 | -0.67154 | -1.15545 | C                                                          | -1.37435 | -0.67154 | -1.15545 |
| C                                                             | -0.91909 | -0.05780 | -2.35659 | C                                                          | -0.91909 | -0.05780 | -2.35659 |
| H                                                             | -0.53453 | 0.94798  | -2.44487 | H                                                          | -0.53453 | 0.94798  | -2.44487 |
| C                                                             | -1.00367 | -1.00895 | -3.40218 | C                                                          | -1.00367 | -1.00895 | -3.40218 |
| H                                                             | -0.71462 | -0.84752 | -4.43001 | H                                                          | -0.71462 | -0.84752 | -4.43001 |
| C                                                             | -1.54418 | -2.20385 | -2.86566 | C                                                          | -1.54418 | -2.20385 | -2.86566 |
| H                                                             | -1.73642 | -3.11486 | -3.41251 | H                                                          | -1.73642 | -3.11486 | -3.41251 |
| C                                                             | -1.77356 | -2.00162 | -1.48642 | C                                                          | -1.77356 | -2.00162 | -1.48642 |
| H                                                             | -2.16556 | -2.73349 | -0.79729 | H                                                          | -2.16556 | -2.73349 | -0.79729 |
| C                                                             | 2.58320  | 0.81698  | 0.45775  | C                                                          | 2.58320  | 0.81698  | 0.45775  |
| C                                                             | 3.65752  | 0.32515  | 1.21868  | C                                                          | 3.65752  | 0.32515  | 1.21868  |
| C                                                             | 4.80468  | 1.10067  | 1.33913  | C                                                          | 4.80468  | 1.10067  | 1.33913  |
| H                                                             | 5.64667  | 0.72534  | 1.90799  | H                                                          | 5.64667  | 0.72534  | 1.90799  |
| C                                                             | 4.88965  | 2.34919  | 0.75117  | C                                                          | 4.88965  | 2.34919  | 0.75117  |
| H                                                             | 5.79050  | 2.94010  | 0.85358  | H                                                          | 5.79050  | 2.94010  | 0.85358  |
| C                                                             | 3.81195  | 2.84151  | 0.03982  | C                                                          | 3.81195  | 2.84151  | 0.03982  |
| H                                                             | 3.88119  | 3.82512  | -0.40915 | H                                                          | 3.88119  | 3.82512  | -0.40915 |
| C                                                             | 2.64840  | 2.09530  | -0.11907 | C                                                          | 2.64840  | 2.09530  | -0.11907 |
| C                                                             | 3.60962  | -1.02596 | 1.89990  | C                                                          | 3.60962  | -1.02596 | 1.89990  |
| H                                                             | 2.58490  | -1.39561 | 1.85512  | H                                                          | 2.58490  | -1.39561 | 1.85512  |
| C                                                             | 3.97482  | -0.93257 | 3.38142  | C                                                          | 3.97482  | -0.93257 | 3.38142  |

|                                                        |          |          |          |                                                        |          |          |          |    |          |          |          |
|--------------------------------------------------------|----------|----------|----------|--------------------------------------------------------|----------|----------|----------|----|----------|----------|----------|
| H                                                      | 3.34779  | -0.20747 | 3.90110  | C                                                      | 3.45103  | 1.72763  | 0.29988  | C  | -1.65780 | 3.07947  | 3.73647  |
| H                                                      | 5.01501  | -0.64163 | 3.53543  | C                                                      | 3.01660  | -1.58657 | -1.61488 | H  | -2.54696 | 2.69760  | 4.21561  |
| H                                                      | 3.83717  | -1.90090 | 3.86505  | H                                                      | 1.93802  | -1.61590 | -1.44485 | C  | -0.47880 | 3.50358  | 4.39297  |
| C                                                      | 4.50115  | -2.03650 | 1.17761  | C                                                      | 3.21175  | -1.69094 | -3.12722 | H  | -0.31056 | 3.50672  | 5.46002  |
| H                                                      | 4.42775  | -3.01989 | 1.64535  | H                                                      | 4.26359  | -1.78188 | -3.40054 | C  | 1.89656  | 5.56157  | 4.40397  |
| H                                                      | 5.54902  | -1.73120 | 1.21015  | H                                                      | 2.80965  | -0.81937 | -3.64387 | C  | 2.09636  | 5.51834  | 5.78886  |
| H                                                      | 4.21557  | -2.14323 | 0.13148  | H                                                      | 2.70298  | -2.57539 | -3.51412 | C  | 2.15344  | 6.71504  | 6.49471  |
| C                                                      | 1.51155  | 2.69485  | -0.91800 | C                                                      | 3.61046  | -2.79877 | -0.89648 | H  | 2.31300  | 6.70064  | 7.56582  |
| H                                                      | 0.64776  | 2.03560  | -0.82552 | H                                                      | 3.16484  | -3.72435 | -1.26589 | C  | 2.02312  | 7.93039  | 5.84906  |
| C                                                      | 1.85084  | 2.78639  | -2.40571 | H                                                      | 3.43745  | -2.74556 | 0.17792  | H  | 2.06707  | 8.85295  | 6.41316  |
| H                                                      | 2.07028  | 1.80718  | -2.82932 | H                                                      | 4.68780  | -2.86174 | -1.05886 | C  | 1.85746  | 7.96181  | 4.47714  |
| H                                                      | 2.72028  | 3.42310  | -2.57802 | C                                                      | 2.70207  | 2.73477  | 1.14478  | H  | 1.78475  | 8.91837  | 3.97387  |
| H                                                      | 1.01572  | 3.21000  | -2.96757 | H                                                      | 1.71505  | 2.33405  | 1.37502  | C  | 1.79742  | 6.78885  | 3.73334  |
| C                                                      | 1.10805  | 4.07068  | -0.38731 | C                                                      | 2.47657  | 4.02462  | 0.35661  | C  | 2.34540  | 4.22009  | 6.51998  |
| H                                                      | 1.88104  | 4.81937  | -0.56637 | H                                                      | 1.96001  | 3.82541  | -0.58287 | H  | 2.03244  | 3.40240  | 5.86430  |
| H                                                      | 0.92423  | 4.05194  | 0.68705  | H                                                      | 3.41920  | 4.51984  | 0.11543  | C  | 3.84457  | 4.07072  | 6.78155  |
| H                                                      | 0.20065  | 4.42111  | -0.88155 | H                                                      | 1.86381  | 4.72309  | 0.92830  | H  | 4.41098  | 4.07534  | 5.84862  |
| C                                                      | -2.71605 | 0.18817  | 0.64259  | C                                                      | 3.41243  | 3.02847  | 2.46606  | H  | 4.05754  | 3.14608  | 7.32003  |
| C                                                      | -3.34534 | 1.39465  | 0.29167  | H                                                      | 2.79318  | 3.67071  | 3.09412  | H  | 4.21339  | 4.89563  | 7.39358  |
| C                                                      | -4.63140 | 1.64348  | 0.75459  | H                                                      | 4.36248  | 3.54417  | 2.31686  | C  | 1.54195  | 4.08737  | 7.81148  |
| H                                                      | -5.13203 | 2.56329  | 0.47751  | H                                                      | 3.62576  | 2.11591  | 3.02372  | H  | 1.85393  | 4.80993  | 8.56659  |
| C                                                      | -5.28501 | 0.74061  | 1.57250  | Fe                                                     | -0.37600 | -0.85905 | 2.36036  | H  | 1.68083  | 3.09534  | 8.24510  |
| H                                                      | -6.28455 | 0.95209  | 1.92948  | N                                                      | 1.48852  | 0.27315  | 0.11264  | H  | 0.47430  | 4.23374  | 7.64120  |
| C                                                      | -4.65031 | -0.43099 | 1.93395  | Si                                                     | -0.68280 | 2.11176  | -0.04638 | C  | 1.69928  | 6.88389  | 2.22665  |
| H                                                      | -5.16395 | -1.13063 | 2.58237  | C                                                      | -1.89529 | 0.17536  | 1.42971  | H  | 1.57127  | 5.87976  | 1.82239  |
| C                                                      | -3.37103 | -0.73338 | 1.47584  | C                                                      | -1.58203 | 0.77706  | 2.67958  | C  | 3.00551  | 7.43289  | 1.64968  |
| C                                                      | -2.67759 | 2.42993  | -0.58557 | H                                                      | -1.24857 | 1.79332  | 2.83093  | H  | 3.85384  | 6.81774  | 1.95173  |
| H                                                      | -1.62928 | 2.14869  | -0.69765 | C                                                      | -1.77898 | -0.19233 | 3.69567  | H  | 3.19418  | 8.45296  | 1.98913  |
| C                                                      | -3.30252 | 2.45072  | -1.98075 | H                                                      | -1.62600 | -0.03563 | 4.75319  | H  | 2.96758  | 7.44954  | 0.55873  |
| H                                                      | -4.35019 | 2.75469  | -1.93851 | C                                                      | -2.22697 | -1.38600 | 3.08340  | C  | 0.49011  | 7.69804  | 1.77234  |
| H                                                      | -3.25946 | 1.46746  | -2.44818 | H                                                      | -2.47355 | -2.30819 | 3.58803  | H  | 0.41758  | 7.69580  | 0.68347  |
| H                                                      | -2.77995 | 3.15611  | -2.63025 | C                                                      | -2.28977 | -1.16514 | 1.68525  | H  | 0.55460  | 8.74032  | 2.08885  |
| C                                                      | -2.70939 | 3.82107  | 0.04724  | H                                                      | -2.60477 | -1.88092 | 0.94069  | H  | -0.43625 | 7.28473  | 2.17205  |
| H                                                      | -2.13847 | 4.52924  | -0.55546 | C                                                      | -2.84001 | 0.40489  | -0.75718 | Fe | -0.02599 | 1.98493  | 3.11116  |
| H                                                      | -2.28508 | 3.81297  | 1.05216  | C                                                      | -4.09736 | 1.01750  | -0.62340 | N  | 1.77319  | 4.34544  | 3.66263  |
| H                                                      | -3.72347 | 4.21503  | 0.12614  | C                                                      | -5.11537 | 0.64722  | -1.49391 | Si | 3.12523  | 3.70173  | 2.75232  |
| C                                                      | -2.75124 | -2.04289 | 1.91719  | H                                                      | -6.09293 | 1.10379  | -1.39848 | C  | 1.76534  | 1.06397  | 3.18958  |
| H                                                      | -1.79312 | -2.16019 | 1.40876  | C                                                      | -4.90392 | -0.29289 | -2.48606 | C  | 1.14701  | 0.78567  | 1.94258  |
| C                                                      | -2.47511 | -2.03877 | 3.42136  | H                                                      | -5.70674 | -0.56436 | -3.15911 | H  | 1.52186  | 1.03913  | 0.96376  |
| H                                                      | -3.40075 | -1.97165 | 3.99579  | C                                                      | -3.66163 | -0.88415 | -2.61079 | C  | -0.07437 | 0.12489  | 2.21283  |
| H                                                      | -1.84701 | -1.19597 | 3.70761  | H                                                      | -3.50106 | -1.62011 | -3.38970 | H  | -0.78031 | -0.21395 | 1.46988  |
| H                                                      | -1.96550 | -2.95550 | 3.72361  | C                                                      | -2.61781 | -0.55666 | -1.75139 | C  | -0.21387 | -0.00397 | 3.61575  |
| C                                                      | -3.62262 | -3.24236 | 1.54010  | C                                                      | -4.38872 | 2.04049  | 0.45415  | H  | -1.04321 | -0.46006 | 4.13476  |
| H                                                      | -3.10274 | -4.17620 | 1.76082  | H                                                      | -3.44428 | 2.34510  | 0.90772  | C  | 0.92681  | 0.56986  | 4.22506  |
| H                                                      | -3.88066 | -3.24039 | 0.48088  | C                                                      | -5.03442 | 3.30559  | -0.10908 | H  | 1.11484  | 0.63737  | 5.28710  |
| H                                                      | -4.55940 | -3.25503 | 2.09919  | H                                                      | -6.03260 | 3.11936  | -0.50833 | C  | 4.18760  | 0.86291  | 3.25595  |
| Fe                                                     | 0.20227  | -1.68985 | -1.87487 | H                                                      | -4.43188 | 3.73551  | -0.90963 | C  | 4.75781  | 0.63337  | 1.99868  |
| N                                                      | -0.17633 | 1.62879  | 1.99581  | H                                                      | -5.13751 | 4.05736  | 0.67492  | C  | 5.83552  | -0.24244 | 1.91887  |
| H                                                      | -0.34554 | 2.49974  | 1.52344  | C                                                      | -5.24549 | 1.42743  | 1.56269  | H  | 6.29625  | -0.42020 | 0.95591  |
| H                                                      | 0.17024  | 1.76005  | 2.92959  | H                                                      | -5.42418 | 2.15284  | 2.35830  | C  | 6.33619  | -0.88312 | 3.03198  |
| N                                                      | 1.44357  | -0.01023 | 0.24715  | H                                                      | -4.75693 | 0.55970  | 2.00608  | H  | 7.17358  | -1.56216 | 2.94339  |
| N                                                      | -1.40790 | -0.08869 | 0.13310  | H                                                      | -6.21675 | 1.10739  | 1.18010  | C  | 5.75982  | -0.64392 | 4.26165  |
| Si                                                     | -0.02833 | 0.13213  | 1.18945  | C                                                      | -1.28859 | -1.25346 | -1.92565 | H  | 6.15350  | -1.14922 | 5.13373  |
| H                                                      | 0.01127  | -0.88403 | 2.27677  | H                                                      | -0.65406 | -0.93324 | -1.09891 | C  | 4.68583  | 0.22762  | 4.40523  |
| 4 (C <sub>1</sub> ): E <sub>tot</sub> = -3055.69513045 |          |          |          | C                                                      | -0.61924 | -0.85148 | -3.23939 | C  | 4.31797  | 1.28535  | 0.70666  |
| C                                                      | 1.31963  | -0.59853 | 1.21906  | H                                                      | -0.49433 | 0.22755  | -3.30016 | H  | 3.41675  | 1.86382  | 0.88398  |
| C                                                      | 0.89826  | -1.95508 | 1.18042  | H                                                      | -1.21477 | -1.16877 | -4.09725 | C  | 5.37677  | 2.27168  | 0.21264  |
| H                                                      | 0.61688  | -2.51018 | 0.29644  | H                                                      | 0.36236  | -1.32039 | -3.33691 | H  | 6.30865  | 1.76281  | -0.04040 |
| C                                                      | 0.89982  | -2.45565 | 2.50622  | C                                                      | -1.41132 | -2.77350 | -1.82608 | H  | 5.59237  | 3.02364  | 0.97094  |
| H                                                      | 0.62564  | -3.45686 | 2.80371  | H                                                      | -0.42607 | -3.24109 | -1.89326 | H  | 5.02652  | 2.78294  | -0.68570 |
| C                                                      | 1.33159  | -1.41547 | 3.36356  | H                                                      | -2.01731 | -3.18808 | -2.63285 | C  | 3.96707  | 0.25018  | -0.36259 |
| H                                                      | 1.44122  | -1.47844 | 4.43587  | H                                                      | -1.86222 | -3.08203 | -0.88270 | H  | 3.55678  | 0.74646  | -1.24346 |
| C                                                      | 1.57678  | -0.26585 | 2.57455  | N                                                      | -1.80771 | 0.76992  | 0.15879  | H  | 3.22873  | -0.46731 | -0.00212 |
| H                                                      | 1.90476  | 0.69367  | 2.94234  | O                                                      | -0.78885 | 2.23083  | -1.71436 | H  | 4.83984  | -0.31464 | -0.69230 |
| C                                                      | 2.85769  | 0.56762  | -0.21617 | H                                                      | 1.02190  | -0.11346 | -0.69608 | C  | 4.13060  | 0.38450  | 5.81059  |
| C                                                      | 3.58619  | -0.30058 | -1.04782 | H                                                      | -0.31704 | 2.98495  | -2.07386 | H  | 3.40069  | 1.20027  | 5.85602  |
| C                                                      | 4.90839  | 0.01198  | -1.34210 | 5 (C <sub>1</sub> ): E <sub>tot</sub> = -3055.70217014 |          |          |          | C  | 5.22330  | 0.75631  | 6.81343  |
| H                                                      | 5.48509  | -0.64970 | -1.97646 | C                                                      | 0.45467  | 3.92981  | 3.40508  | H  | 5.76816  | 1.64484  | 6.49832  |
| C                                                      | 5.50924  | 1.14547  | -0.82852 | C                                                      | -0.17343 | 3.77665  | 2.13499  | H  | 5.94411  | -0.05066 | 6.94530  |
| H                                                      | 6.54157  | 1.36914  | -1.06344 | H                                                      | 0.26981  | 4.00451  | 1.17714  | H  | 4.78500  | 0.95523  | 7.79229  |
| C                                                      | 4.77990  | 1.99206  | -0.01723 | C                                                      | -1.46466 | 3.23518  | 2.34229  | C  | 3.40598  | -0.89100 | 6.24662  |
| H                                                      | 5.25092  | 2.88608  | 0.37255  | H                                                      | -2.18095 | 2.99455  | 1.57068  | H  | 2.93494  | -0.75422 | 7.22161  |

|                                                            |          |          |          |                                                            |          |          |          |                                                            |          |          |          |  |  |  |  |
|------------------------------------------------------------|----------|----------|----------|------------------------------------------------------------|----------|----------|----------|------------------------------------------------------------|----------|----------|----------|--|--|--|--|
| H                                                          | 4.10578  | -1.72318 | 6.33420  | H                                                          | -2.41883 | 3.69478  | 2.22479  | H                                                          | -5.53242 | 0.81164  | 2.13093  |  |  |  |  |
| H                                                          | 2.63776  | -1.18632 | 5.53278  | C                                                          | -2.21706 | 3.97915  | -0.51640 | C                                                          | -4.84606 | 2.38608  | 0.86674  |  |  |  |  |
| N                                                          | 3.02104  | 1.74783  | 3.40018  | H                                                          | -1.74522 | 3.78201  | -1.47937 | H                                                          | -5.72793 | 2.99376  | 1.02232  |  |  |  |  |
| H                                                          | 3.01832  | 2.03064  | 4.37948  | H                                                          | -1.59488 | 4.69611  | 0.02036  | C                                                          | -3.82689 | 2.83735  | 0.05000  |  |  |  |  |
| O                                                          | 4.54973  | 4.16132  | 3.09317  | H                                                          | -3.17382 | 4.46589  | -0.70969 | H                                                          | -3.92129 | 3.80447  | -0.42933 |  |  |  |  |
| H                                                          | 2.61001  | 3.51736  | 1.37050  | C                                                          | -3.05899 | -2.03073 | -1.60824 | C                                                          | -2.68994 | 2.06806  | -0.17609 |  |  |  |  |
| <b>6 (C<sub>1</sub>): E<sub>tot</sub> = -3055.76098406</b> |          |          |          |                                                            |          |          |          |                                                            |          |          |          |  |  |  |  |
| H                                                          | -2.21006 | -2.60860 | 1.02314  | C                                                          | -4.02899 | -3.01151 | -0.94351 | H                                                          | -2.49338 | -1.33570 | 1.93842  |  |  |  |  |
| C                                                          | -1.84037 | -1.81895 | 1.65750  | H                                                          | -3.65587 | -4.03440 | -1.02336 | C                                                          | -3.83358 | -0.86388 | 3.50710  |  |  |  |  |
| C                                                          | -1.43037 | -0.52163 | 1.22715  | H                                                          | -5.01037 | -2.98784 | -1.42046 | H                                                          | -4.87246 | -0.58791 | 3.69379  |  |  |  |  |
| H                                                          | -1.84553 | -2.76924 | 3.66937  | H                                                          | -4.18102 | -2.78632 | 0.11215  | H                                                          | -3.20000 | -0.12228 | 3.99418  |  |  |  |  |
| C                                                          | -0.99737 | 0.18868  | 2.38268  | C                                                          | -2.94988 | -2.33295 | -3.10291 | H                                                          | -3.66420 | -1.82314 | 3.99847  |  |  |  |  |
| C                                                          | -1.10625 | -0.67266 | 3.50069  | H                                                          | -2.57181 | -3.34491 | -3.25857 | C                                                          | -4.42684 | -2.00152 | 1.33721  |  |  |  |  |
| H                                                          | -0.83715 | -0.42793 | 4.51740  | H                                                          | -2.27074 | -1.64135 | -3.59519 | H                                                          | -4.33188 | -2.97735 | 1.81680  |  |  |  |  |
| C                                                          | -1.64027 | -1.90633 | 3.05360  | H                                                          | -3.92002 | -2.26863 | -3.59896 | H                                                          | -4.17476 | -2.12212 | 0.28386  |  |  |  |  |
| Fe                                                         | 0.12495  | -1.48435 | 2.05771  | H                                                          | 0.04337  | 1.65957  | -1.54695 | H                                                          | -5.47480 | -1.70135 | 1.39915  |  |  |  |  |
| H                                                          | 0.74978  | -2.83593 | -0.31675 | O                                                          | -0.14745 | -0.72512 | -2.41271 | C                                                          | -1.61904 | 2.60747  | -1.09807 |  |  |  |  |
| C                                                          | 1.17971  | -2.41616 | 0.58239  | H                                                          | 0.38857  | -0.47555 | -3.16825 | H                                                          | -0.82699 | 1.86069  | -1.16544 |  |  |  |  |
| C                                                          | 1.38883  | -3.09177 | 1.81038  | <b>7 (C<sub>1</sub>): E<sub>tot</sub> = -2980.63295189</b> |          |          |          |                                                            |          |          |          |  |  |  |  |
| H                                                          | 1.16084  | -4.12843 | 2.00876  | C                                                          | 1.41677  | -0.70335 | -1.17879 | C                                                          | -1.00200 | 3.89312  | -0.54946 |  |  |  |  |
| C                                                          | 1.96233  | -2.17521 | 2.72547  | C                                                          | 0.97108  | -0.11509 | -2.39614 | H                                                          | -0.58146 | 3.74232  | 0.44440  |  |  |  |  |
| H                                                          | 2.24710  | -2.39041 | 3.74439  | H                                                          | 0.60904  | 0.89620  | -2.51254 | H                                                          | -1.73873 | 4.69523  | -0.48027 |  |  |  |  |
| C                                                          | 2.08704  | -0.92373 | 2.07653  | C                                                          | 1.03822  | -1.09578 | -3.41477 | C                                                          | -2.15197 | 2.83074  | -2.51354 |  |  |  |  |
| C                                                          | 1.59186  | -1.06517 | 0.75005  | H                                                          | 0.75200  | -0.95754 | -4.44675 | H                                                          | -1.34820 | 3.14800  | -3.18049 |  |  |  |  |
| H                                                          | 2.47865  | -0.01556 | 2.50934  | C                                                          | 1.55941  | -2.28404 | -2.84599 | H                                                          | -2.92077 | 3.60464  | -2.53927 |  |  |  |  |
| H                                                          | -0.61388 | 1.19871  | 2.39594  | H                                                          | 1.73685  | -3.21253 | -3.36789 | H                                                          | -2.58988 | 1.92292  | -2.92832 |  |  |  |  |
| N                                                          | 1.44877  | -0.01965 | -0.18099 | C                                                          | 1.79250  | -2.04873 | -1.47243 | N                                                          | -1.44432 | -0.00224 | 0.23013  |  |  |  |  |
| N                                                          | -1.42902 | -0.05192 | -0.10712 | H                                                          | 2.16920  | -2.76939 | -0.76359 | H                                                          | 0.11066  | -0.55443 | 2.32975  |  |  |  |  |
| Si                                                         | -0.02090 | 0.25442  | -1.07327 | C                                                          | 2.71249  | 0.21893  | 0.66038  | H                                                          | 0.05758  | 1.69100  | 1.51150  |  |  |  |  |
| C                                                          | 2.63744  | 0.68414  | -0.54251 | C                                                          | 3.31742  | 1.44909  | 0.34525  | <b>8 (C<sub>1</sub>): E<sub>tot</sub> = -3061.30468923</b> |          |          |          |  |  |  |  |
| C                                                          | 4.96193  | 2.04332  | -1.23971 | C                                                          | 4.56083  | 1.74342  | 0.89131  | C                                                          | -0.72430 | 4.05064  | 4.66527  |  |  |  |  |
| C                                                          | 2.87772  | 1.96444  | -0.01975 | H                                                          | 5.04730  | 2.67886  | 0.64440  | C                                                          | -1.72747 | 4.29327  | 3.68635  |  |  |  |  |
| C                                                          | 3.56194  | 0.08252  | -1.41312 | C                                                          | 5.18989  | 0.86438  | 1.75360  | H                                                          | -1.64452 | 4.97937  | 2.85687  |  |  |  |  |
| C                                                          | 4.72107  | 0.77673  | -1.73994 | H                                                          | 6.15600  | 1.11223  | 2.17367  | C                                                          | -2.84043 | 3.47038  | 3.98206  |  |  |  |  |
| C                                                          | 4.04246  | 2.62893  | -0.39062 | C                                                          | 4.57605  | -0.32872 | 2.08041  | H                                                          | -3.75948 | 3.42282  | 3.41729  |  |  |  |  |
| H                                                          | 5.44912  | 0.32227  | -2.40078 | H                                                          | 5.07159  | -1.00779 | 2.76376  | C                                                          | -2.53320 | 2.71224  | 5.13770  |  |  |  |  |
| H                                                          | 4.23897  | 3.62039  | -0.00037 | C                                                          | 3.33999  | -0.67664 | 1.54357  | H                                                          | -3.17842 | 1.98841  | 5.61303  |  |  |  |  |
| H                                                          | 5.86655  | 2.57210  | -1.51036 | C                                                          | 2.67204  | 2.44784  | -0.58968 | C                                                          | -1.23759 | 3.08212  | 5.57499  |  |  |  |  |
| C                                                          | -2.70182 | 0.33077  | -0.64704 | H                                                          | 1.62868  | 2.15730  | -0.72489 | H                                                          | -0.71537 | 2.67732  | 6.42971  |  |  |  |  |
| C                                                          | -5.18743 | 1.08963  | -1.65237 | C                                                          | 2.66896  | 3.86309  | -0.01417 | C                                                          | 0.67554  | 6.01082  | 4.72914  |  |  |  |  |
| C                                                          | -3.16411 | 1.64512  | -0.45616 | H                                                          | 3.67568  | 4.26802  | 0.09807  | C                                                          | 0.50462  | 6.65043  | 5.96773  |  |  |  |  |
| C                                                          | -3.48075 | -0.59870 | -1.35816 | H                                                          | 2.18584  | 3.89425  | 0.96259  | C                                                          | 0.56898  | 8.03754  | 6.01907  |  |  |  |  |
| C                                                          | -4.71744 | -0.19365 | -1.85068 | C                                                          | 2.12591  | 4.53916  | -0.67589 | H                                                          | 0.42809  | 8.54522  | 6.96569  |  |  |  |  |
| C                                                          | -4.41124 | 1.99836  | -0.95994 | C                                                          | 3.34946  | 2.41506  | -1.96050 | C                                                          | 0.81931  | 8.78462  | 4.88219  |  |  |  |  |
| H                                                          | -5.32858 | -0.90006 | -2.39919 | H                                                          | 2.84929  | 3.09160  | -2.65649 | H                                                          | 0.87185  | 9.86405  | 4.94068  |  |  |  |  |
| H                                                          | -4.78472 | 3.00349  | -0.80762 | H                                                          | 3.32900  | 1.41421  | -2.39102 | C                                                          | 1.00629  | 8.14418  | 3.67240  |  |  |  |  |
| H                                                          | -6.15561 | 1.38158  | -2.03803 | H                                                          | 4.39354  | 2.72620  | -1.88982 | H                                                          | 1.20850  | 8.73481  | 2.78672  |  |  |  |  |
| C                                                          | 1.92687  | 2.64732  | 0.93830  | C                                                          | 2.74185  | -2.01075 | 1.93778  | C                                                          | 0.93177  | 6.75815  | 3.57138  |  |  |  |  |
| H                                                          | 1.10884  | 1.95649  | 1.14757  | H                                                          | 1.79353  | -2.13062 | 1.41100  | C                                                          | 0.24314  | 5.87858  | 7.24255  |  |  |  |  |
| C                                                          | 2.60387  | 2.97130  | 2.27069  | C                                                          | 2.44446  | -2.07115 | 3.43659  | H                                                          | 0.38814  | 4.81801  | 7.37076  |  |  |  |  |
| H                                                          | 3.05480  | 2.08762  | 2.72227  | H                                                          | 1.78747  | -1.25932 | 3.74628  | C                                                          | 1.23176  | 6.24899  | 8.34738  |  |  |  |  |
| H                                                          | 1.87938  | 3.37632  | 2.97925  | H                                                          | 3.35777  | -2.00413 | 4.03014  | H                                                          | 1.07720  | 5.61503  | 9.22197  |  |  |  |  |
| H                                                          | 3.39433  | 3.71428  | 2.15343  | H                                                          | 1.95664  | -3.01316 | 3.69321  | H                                                          | 1.11900  | 7.28368  | 8.67493  |  |  |  |  |
| C                                                          | 1.32783  | 3.91145  | 0.32446  | C                                                          | 3.65319  | -3.17131 | 1.53244  | H                                                          | 2.26201  | 6.11669  | 8.01515  |  |  |  |  |
| H                                                          | 0.81108  | 3.69501  | -0.60980 | H                                                          | 3.15949  | -4.12792 | 1.71232  | C                                                          | -1.20300 | 6.06301  | 7.70187  |  |  |  |  |
| H                                                          | 2.09592  | 4.65771  | 0.11394  | H                                                          | 4.58082  | -3.17274 | 2.10695  | H                                                          | -1.41363 | 7.10709  | 7.94190  |  |  |  |  |
| H                                                          | 0.60794  | 4.36652  | 1.00742  | H                                                          | 3.92893  | -3.12389 | 0.47894  | H                                                          | -1.40355 | 5.47048  | 8.59638  |  |  |  |  |
| C                                                          | 3.35236  | -1.30548 | -1.97927 | Fe                                                         | -0.17824 | -1.71859 | -1.86988 | H                                                          | -1.90412 | 5.74927  | 6.92849  |  |  |  |  |
| H                                                          | 2.32857  | -1.61270 | -1.77188 | N                                                          | 1.43826  | -0.09574 | 0.09517  | C                                                          | 1.14502  | 6.11411  | 2.22029  |  |  |  |  |
| C                                                          | 4.27862  | -2.31111 | -1.29505 | Si                                                         | 0.04729  | 0.26894  | 0.97386  | H                                                          | 0.97386  | 5.04123  | 2.32903  |  |  |  |  |
| H                                                          | 4.09697  | -3.32028 | -1.66893 | C                                                          | -1.62219 | -1.12984 | -0.59014 | C                                                          | 2.58349  | 6.31318  | 1.74719  |  |  |  |  |
| H                                                          | 4.12014  | -2.32162 | -0.21688 | C                                                          | -1.23903 | -2.46637 | -0.29328 | H                                                          | 3.29779  | 5.86819  | 2.44071  |  |  |  |  |
| H                                                          | 5.32803  | -2.07224 | -1.47834 | H                                                          | -0.81423 | -2.81013 | 0.64020  | H                                                          | 2.83075  | 7.37212  | 1.65369  |  |  |  |  |
| C                                                          | 3.52453  | -1.34308 | -3.49765 | C                                                          | -1.47864 | -3.25695 | -1.44555 | H                                                          | 2.73741  | 5.85302  | 0.77027  |  |  |  |  |
| H                                                          | 3.26034  | -2.32842 | -3.88414 | H                                                          | -1.28124 | -4.31439 | -1.53929 | C                                                          | 0.16137  | 6.63769  | 1.17366  |  |  |  |  |
| H                                                          | 4.55151  | -1.14148 | -3.80527 | C                                                          | -2.04213 | -2.42236 | -2.44109 | H                                                          | 0.32730  | 7.69284  | 1.95034  |  |  |  |  |
| H                                                          | 2.88923  | -0.60700 | -3.99387 | H                                                          | -2.34567 | -2.73076 | -3.43019 | H                                                          | -0.87284 | 6.53633  | 1.50321  |  |  |  |  |
| C                                                          | -2.37667 | 2.69548  | 0.29751  | C                                                          | -2.12709 | -1.10897 | -1.91970 | H                                                          | 0.26994  | 6.08759  | 0.23721  |  |  |  |  |
| H                                                          | -1.37305 | 2.31000  | 0.48337  | H                                                          | -2.50394 | -0.23786 | -2.43445 | Fe                                                         | -1.13499 | 2.34153  | 3.67129  |  |  |  |  |
| C                                                          | -3.02094 | 2.98475  | 1.65392  | C                                                          | -2.58662 | 0.82027  | 0.45724  | N                                                          | 0.57519  | 4.59167  | 4.65384  |  |  |  |  |
| H                                                          | -3.12485 | 2.07637  | 2.24685  | C                                                          | -3.60438 | 0.36226  | 1.31027  | Si                                                         | 1.93678  | 3.51371  | 4.89297  |  |  |  |  |
| H                                                          | -4.01559 | 3.41822  | 1.53448  | C                                                          | -4.73144 | 1.15570  | 1.48828  | C                                                          | 0.71238  | 1.67936  | 3.17164  |  |  |  |  |

|                                                               |          |          |          |                                                                |          |          |          |   |          |          |          |
|---------------------------------------------------------------|----------|----------|----------|----------------------------------------------------------------|----------|----------|----------|---|----------|----------|----------|
| C                                                             | 0.01675  | 2.11826  | 2.00849  | H                                                              | -0.82302 | 5.93841  | 6.28878  | H | 4.25116  | 20.03193 | -0.58386 |
| H                                                             | 0.32360  | 2.92630  | 1.36050  | C                                                              | 2.73852  | 6.25828  | 1.50641  | C | 5.98896  | 18.90557 | 0.24182  |
| C                                                             | -1.15960 | 1.34324  | 1.87289  | H                                                              | 2.81219  | 5.17160  | 1.56912  | H | 6.81778  | 19.27110 | -0.34588 |
| H                                                             | -1.90034 | 1.44546  | 1.09377  | C                                                              | 4.12035  | 6.78781  | 1.12232  | C | 6.06857  | 17.94755 | 1.28082  |
| C                                                             | -1.19429 | 0.40901  | 2.93836  | H                                                              | 4.87083  | 6.51100  | 1.86403  | H | 6.96718  | 17.46142 | 1.62638  |
| H                                                             | -1.96759 | -0.32402 | 3.11409  | H                                                              | 4.13057  | 7.87502  | 1.03066  | C | 4.78666  | 20.04504 | 3.95688  |
| C                                                             | -0.04697 | 0.61098  | 3.73806  | H                                                              | 4.43424  | 6.38157  | 0.15967  | C | 4.34054  | 21.11619 | 3.12190  |
| H                                                             | 0.20100  | 0.06100  | 4.63325  | C                                                              | 1.70258  | 6.60034  | 0.43591  | H | 3.31811  | 21.42685 | 2.97339  |
| C                                                             | 3.10528  | 1.47482  | 3.43267  | H                                                              | 1.98369  | 6.16670  | -0.52646 | C | 5.46860  | 21.69168 | 2.49415  |
| C                                                             | 3.81947  | 1.67112  | 2.23285  | H                                                              | 1.61665  | 7.67958  | 0.29512  | H | 5.45300  | 22.51690 | 1.79766  |
| C                                                             | 4.98515  | 0.94422  | 2.01402  | H                                                              | 0.71507  | 6.22288  | 0.70161  | C | 6.62053  | 20.98896 | 2.92663  |
| H                                                             | 5.53330  | 1.07905  | 1.09015  | Fe                                                             | 0.18966  | 2.03418  | 3.17742  | H | 7.63701  | 21.18565 | 2.61965  |
| C                                                             | 5.46568  | 0.05240  | 2.95495  | N                                                              | 1.91961  | 4.49767  | 3.68587  | C | 6.20499  | 19.98675 | 3.83523  |
| H                                                             | 6.37927  | -0.49739 | 2.76977  | Si                                                             | 3.21050  | 3.45913  | 4.29473  | H | 6.84586  | 19.27104 | 4.32940  |
| C                                                             | 4.76671  | -0.13169 | 4.13058  | C                                                              | 1.97697  | 1.15259  | 3.49987  | C | 4.76994  | 15.57168 | 2.84758  |
| H                                                             | 5.14478  | -0.83180 | 4.86568  | C                                                              | 1.32571  | 0.53208  | 2.39579  | C | 3.91220  | 14.69475 | 2.16278  |
| C                                                             | 3.58191  | 0.55417  | 4.38529  | H                                                              | 1.69500  | 0.48965  | 1.38356  | C | 4.25477  | 13.35087 | 2.07585  |
| C                                                             | 3.35582  | 2.62651  | 1.15644  | C                                                              | 0.09952  | -0.00911 | 2.85119  | H | 3.60574  | 12.66601 | 1.54347  |
| H                                                             | 2.59251  | 3.27396  | 1.59199  | H                                                              | -0.62129 | -0.53732 | 2.24519  | C | 5.41055  | 12.86862 | 2.66232  |
| C                                                             | 4.48147  | 3.52737  | 0.64946  | C                                                              | -0.02028 | 0.27511  | 4.23212  | H | 5.66029  | 11.81787 | 2.59071  |
| H                                                             | 5.27066  | 2.96380  | 0.14998  | H                                                              | -0.84786 | -0.00025 | 4.86889  | C | 6.24504  | 13.73698 | 3.33912  |
| H                                                             | 4.93516  | 4.09760  | 1.46020  | C                                                              | 1.14375  | 0.97078  | 4.64145  | H | 7.14919  | 13.35271 | 3.79647  |
| H                                                             | 4.09497  | 4.24002  | -0.07981 | H                                                              | 1.34658  | 1.33550  | 5.63735  | C | 5.94926  | 15.09320 | 3.43827  |
| C                                                             | 2.73207  | 1.85088  | -0.00594 | C                                                              | 4.32016  | 1.25046  | 2.93489  | C | 2.64280  | 15.17380 | 1.49246  |
| H                                                             | 3.47998  | 1.23248  | -0.50637 | C                                                              | 4.69526  | 1.40984  | 1.59001  | H | 2.44947  | 16.19722 | 1.81408  |
| H                                                             | 2.31740  | 2.53355  | -0.75056 | C                                                              | 5.85762  | 0.78965  | 1.13855  | C | 2.81350  | 15.19798 | -0.02674 |
| H                                                             | 1.93190  | 1.19323  | 0.33093  | H                                                              | 6.16833  | 0.92359  | 0.10951  | H | 3.64841  | 15.83545 | -0.31803 |
| C                                                             | 2.87332  | 0.26144  | 5.69111  | C                                                              | 6.61120  | -0.01641 | 1.97221  | H | 1.91390  | 15.58197 | -0.51170 |
| H                                                             | 1.94219  | 0.82514  | 5.71575  | H                                                              | 7.50111  | -0.50650 | 1.59804  | H | 3.00197  | 14.19742 | -0.42115 |
| C                                                             | 3.70697  | 0.72034  | 6.88747  | C                                                              | 6.20607  | -0.21255 | 3.28366  | C | 1.42533  | 14.34786 | 1.90412  |
| H                                                             | 3.95366  | 1.78012  | 6.81747  | H                                                              | 6.78390  | -0.87010 | 3.92172  | H | 1.48672  | 13.31545 | 1.55585  |
| H                                                             | 4.64489  | 0.16683  | 6.96048  | C                                                              | 5.07142  | 0.41729  | 3.78674  | H | 0.51631  | 14.77700 | 1.47898  |
| H                                                             | 3.16036  | 0.56722  | 7.81932  | C                                                              | 3.85007  | 2.17946  | 0.59848  | H | 1.31499  | 14.32880 | 2.98867  |
| C                                                             | 2.51074  | -1.21929 | 5.81211  | H                                                              | 2.95026  | 2.50705  | 1.12064  | C | 6.91800  | 15.99248 | 4.17359  |
| H                                                             | 1.91615  | -1.39279 | 6.71076  | C                                                              | 4.55366  | 3.42335  | 0.06699  | H | 6.54483  | 17.01538 | 4.09553  |
| H                                                             | 3.39546  | -1.85387 | 5.88288  | H                                                              | 5.46559  | 3.17003  | -0.47727 | C | 6.99375  | 15.63387 | 5.65659  |
| H                                                             | 1.93281  | -1.56020 | 4.95269  | H                                                              | 4.83155  | 4.10092  | 0.86937  | H | 6.01207  | 15.68185 | 6.12434  |
| N                                                             | 1.91549  | 2.22667  | 3.67803  | H                                                              | 3.89905  | 3.96367  | -0.62014 | H | 7.65863  | 16.32111 | 6.18461  |
| N                                                             | 4.87082  | 4.05719  | 4.48785  | C                                                              | 3.42543  | 1.28621  | -0.57037 | H | 7.38380  | 14.62489 | 5.80382  |
| H                                                             | 4.98033  | 3.16704  | 4.02828  | H                                                              | 2.69161  | 1.80058  | -1.19297 | C | 8.31756  | 15.94672 | 3.55714  |
| H                                                             | 5.73343  | 4.56660  | 4.58098  | H                                                              | 2.98447  | 0.34651  | -0.23735 | H | 8.78774  | 14.97252 | 3.70174  |
| B                                                             | 3.66419  | 4.54934  | 4.96047  | H                                                              | 4.27192  | 1.03356  | -1.21132 | H | 8.96632  | 16.69120 | 4.02237  |
| H                                                             | 3.67641  | 5.61884  | 5.49983  | C                                                              | 4.63877  | 0.13779  | 5.20997  | H | 8.30336  | 16.13787 | 2.48428  |
| H                                                             | 1.72843  | 2.89098  | 6.24333  | H                                                              | 3.93141  | 0.91310  | 5.50885  | C | 3.45279  | 19.62687 | 5.94768  |
| <b>9</b> (C <sub>1</sub> ): E <sub>tot</sub> = -3144.33725214 |          |          |          |                                                                |          |          |          |   |          |          |          |
| C                                                             | 0.67310  | 3.99949  | 3.24104  | H                                                              | 6.35065  | 1.10772  | 6.15630  | C | 1.63038  | 20.56239 | 7.23268  |
| C                                                             | 0.35313  | 3.62388  | 1.90538  | H                                                              | 6.50053  | -0.64613 | 6.05746  | H | 0.64469  | 21.01071 | 7.27573  |
| H                                                             | 1.02548  | 3.67898  | 1.06169  | H                                                              | 5.41126  | 0.07137  | 7.22631  | C | 2.33113  | 20.36348 | 8.40593  |
| C                                                             | -0.97481 | 3.13493  | 1.88264  | C                                                              | 3.90919  | -1.20592 | 5.27897  | H | 1.89926  | 20.64892 | 9.35647  |
| H                                                             | -1.49940 | 2.76274  | 1.01517  | H                                                              | 3.54227  | -1.39480 | 6.28938  | C | 3.59669  | 19.80357 | 8.35439  |
| C                                                             | -1.49754 | 3.22763  | 3.19663  | H                                                              | 4.57647  | -2.02635 | 5.00701  | H | 4.14551  | 19.66000 | 9.27659  |
| H                                                             | -2.48972 | 2.93491  | 3.50683  | H                                                              | 3.05434  | -1.23061 | 4.60454  | C | 4.17322  | 19.42534 | 7.14497  |
| C                                                             | -0.49041 | 3.75828  | 4.03364  | N                                                              | 3.16603  | 1.90881  | 3.43798  | C | 1.34474  | 20.49784 | 4.75991  |
| H                                                             | -0.58328 | 3.93259  | 5.09447  | B                                                              | 4.99342  | 4.41322  | 4.46174  | H | 1.89528  | 20.14188 | 3.89054  |
| C                                                             | 1.96013  | 5.90920  | 3.91624  | H                                                              | 2.85940  | 3.07645  | 5.71307  | C | 1.12212  | 22.00294 | 4.59923  |
| C                                                             | 1.64457  | 6.43844  | 5.17941  | H                                                              | 4.90415  | 5.60557  | 4.36736  | H | 0.49993  | 22.40851 | 5.39895  |
| C                                                             | 1.65924  | 7.81868  | 5.35464  | N                                                              | 5.80399  | 3.87915  | 5.61102  | H | 0.61925  | 22.21807 | 3.65461  |
| H                                                             | 1.42200  | 8.23607  | 6.32595  | H                                                              | 6.25390  | 4.59563  | 6.16190  | H | 2.06573  | 22.54819 | 4.61246  |
| C                                                             | 1.96735  | 8.67122  | 4.31281  | H                                                              | 5.30519  | 3.26281  | 6.23554  | C | 0.00959  | 19.75431 | 4.76799  |
| H                                                             | 1.96178  | 9.74292  | 4.46403  | B                                                              | 6.86371  | 4.19067  | 2.94787  | H | 0.15657  | 18.67263 | 4.77460  |
| C                                                             | 2.29618  | 8.14241  | 3.07936  | N                                                              | 7.46788  | 2.95364  | 3.71562  | H | -0.56178 | 19.98573 | 3.86798  |
| H                                                             | 2.55344  | 8.81336  | 2.26863  | H                                                              | 6.86566  | 4.04176  | 1.76097  | H | -0.60992 | 20.02339 | 5.62534  |
| C                                                             | 2.31513  | 6.76919  | 2.86416  | H                                                              | 7.34311  | 5.21039  | 3.35436  | C | 5.56382  | 18.83314 | 7.14862  |
| C                                                             | 1.32376  | 5.57551  | 6.38164  | H                                                              | 5.59673  | 4.11251  | 3.22072  | H | 5.70656  | 18.32861 | 6.19175  |
| H                                                             | 1.25339  | 4.53840  | 6.05619  | H                                                              | 7.02791  | 3.04895  | 4.67266  | C | 6.60539  | 19.94768 | 7.27083  |
| C                                                             | 2.45364  | 5.64065  | 7.41009  | H                                                              | 7.20532  | 2.05958  | 3.30729  | H | 6.48594  | 20.69726 | 6.48951  |
| H                                                             | 3.40589  | 5.34293  | 6.96991  | H                                                              | 8.47686  | 2.99578  | 3.78748  | H | 7.61606  | 19.54141 | 7.19571  |
| H                                                             | 2.24954  | 4.97570  | 8.25164  | <b>10</b> (C <sub>1</sub> ): E <sub>tot</sub> = -3062.49096653 |          |          |          | H | 6.52362  | 20.45501 | 8.23441  |
| H                                                             | 2.57619  | 6.65038  | 7.80610  | C                                                              | 4.76031  | 17.74520 | 1.80320  | C | 5.76473  | 17.79033 | 8.24607  |
| C                                                             | -0.01440 | 5.94777  | 7.02019  | C                                                              | 3.87408  | 18.57946 | 1.06363  | H | 5.70081  | 18.21820 | 9.24788  |
| H                                                             | 0.00741  | 6.94259  | 7.46771  | H                                                              | 2.80924  | 18.66558 | 1.22272  | H | 6.75350  | 17.34012 | 8.15749  |
| H                                                             | -0.26736 | 5.24318  | 7.81467  | C                                                              | 4.63772  | 19.30824 | 0.11840  | H | 5.03424  | 16.98385 | 8.17111  |



|                                                              |          |          |         |                                                             |          |          |          |                                                             |          |          |          |
|--------------------------------------------------------------|----------|----------|---------|-------------------------------------------------------------|----------|----------|----------|-------------------------------------------------------------|----------|----------|----------|
| B                                                            | 2.93730  | 16.28098 | 5.59553 | C                                                           | -0.33592 | 3.64461  | 3.35033  | C                                                           | 4.68934  | -0.21912 | -1.84558 |
| H                                                            | 2.35625  | 15.33219 | 5.11867 | H                                                           | -0.29613 | 3.95281  | 4.38508  | H                                                           | 5.35730  | -0.93828 | -2.30290 |
| H                                                            | 3.92188  | 15.92709 | 6.19772 | N                                                           | 0.14991  | 1.77278  | 2.67458  | C                                                           | 5.03508  | 1.11938  | -1.84492 |
| Fe                                                           | 5.30180  | 19.68273 | 2.03156 | N                                                           | 2.05556  | 4.17222  | 2.73248  | H                                                           | 5.96541  | 1.43917  | -2.29569 |
| N                                                            | 4.43658  | 16.95628 | 2.92223 | Si                                                          | 2.95717  | 3.19698  | 4.44982  | C                                                           | 4.18650  | 2.04995  | -1.27507 |
| N                                                            | 3.99041  | 19.16114 | 4.71780 | C                                                           | 1.85826  | 0.88804  | 3.42291  | H                                                           | 4.46220  | 3.09700  | -1.29220 |
| N                                                            | 1.93605  | 16.91430 | 6.72454 | C                                                           | 1.45281  | 0.27101  | 2.20582  | C                                                           | 2.98921  | 1.66250  | -0.68398 |
| H                                                            | 1.65348  | 16.19210 | 7.37817 | H                                                           | 2.04374  | 0.21224  | 1.30189  | C                                                           | 3.15053  | -2.12540 | -1.32309 |
| H                                                            | 1.09301  | 17.31545 | 6.32677 | C                                                           | 0.14599  | -0.25807 | 2.38083  | H                                                           | 2.11299  | -2.24275 | -1.00723 |
| H                                                            | 2.39290  | 17.65348 | 7.25541 | H                                                           | -0.42133 | -0.80312 | 1.64123  | C                                                           | 3.24214  | -2.69653 | -2.73730 |
| Si                                                           | 3.33631  | 17.60681 | 4.13248 | C                                                           | -0.27003 | 0.04937  | 3.69686  | H                                                           | 4.26438  | -2.69326 | -3.11853 |
| H                                                            | 2.07980  | 17.97184 | 3.37876 | H                                                           | -1.21584 | -0.21732 | 4.14474  | H                                                           | 2.62060  | -2.12896 | -3.42940 |
| <b>1H (C<sub>2v</sub>): E<sub>tot</sub> = -2047.57503431</b> |          |          |         | C                                                           | 0.78148  | 0.75422  | 4.33973  | H                                                           | 2.89906  | -3.73228 | -2.74723 |
| C                                                            | 0.64917  | 3.62491  | 2.77640 | H                                                           | 0.76920  | 1.14166  | 5.34803  | C                                                           | 4.02522  | -2.91091 | -0.34530 |
| C                                                            | 0.23219  | 3.12266  | 1.51085 | N                                                           | 3.02393  | 1.61443  | 3.62762  | H                                                           | 3.74464  | -3.96572 | -0.33812 |
| H                                                            | 0.86737  | 3.00596  | 0.64470 | H                                                           | 4.32410  | 3.65360  | 3.94478  | H                                                           | 3.92816  | -2.53027 | 0.67163  |
| C                                                            | -1.13586 | 2.77365  | 1.60736 | H                                                           | 2.04282  | 5.16897  | 2.92493  | H                                                           | 5.07903  | -2.85224 | -0.62399 |
| H                                                            | -1.73935 | 2.34937  | 0.81876 | H                                                           | 3.73103  | 1.41916  | 2.93615  | C                                                           | 2.08667  | 2.72537  | -0.08978 |
| C                                                            | -1.57711 | 3.07691  | 2.92068 | H                                                           | 2.67058  | 4.03189  | 1.93841  | H                                                           | 1.30320  | 2.23025  | 0.48846  |
| H                                                            | -2.57480 | 2.92385  | 3.30447 | <b>S4 (C<sub>1</sub>): E<sub>tot</sub> = -3006.00793736</b> |          |          |          | C                                                           | 1.40264  | 3.53854  | -1.19048 |
| C                                                            | -0.48321 | 3.61409  | 3.63990 | C                                                           | -1.48429 | -0.02660 | 1.35371  | H                                                           | 0.85060  | 2.90240  | -1.88299 |
| H                                                            | -0.48561 | 3.93451  | 4.67168 | C                                                           | -1.16537 | 1.07234  | 2.20005  | H                                                           | 2.13383  | 4.09425  | -1.77998 |
| Fe                                                           | -0.00349 | 1.74381  | 2.99045 | H                                                           | -0.82368 | 2.04428  | 1.87377  | H                                                           | 0.70449  | 4.26042  | -0.76171 |
| N                                                            | 1.95137  | 4.03524  | 3.11916 | C                                                           | -1.33208 | 0.65162  | 3.54120  | C                                                           | 2.83164  | 3.64561  | 0.87706  |
| Si                                                           | 3.34280  | 3.22718  | 3.76850 | H                                                           | -1.15054 | 1.25251  | 4.41964  | H                                                           | 2.13282  | 4.32409  | 1.36873  |
| C                                                            | 1.64246  | 0.88085  | 3.73691 | C                                                           | -1.78688 | -0.68986 | 3.52881  | H                                                           | 3.57172  | 4.26299  | 0.36648  |
| C                                                            | 1.27699  | 0.23099  | 2.52368 | H                                                           | -2.00978 | -1.29179 | 4.39690  | H                                                           | 3.35595  | 3.08298  | 1.65051  |
| H                                                            | 1.88585  | 0.18275  | 1.63246 | C                                                           | -1.88740 | -1.11110 | 2.18342  | N                                                           | 1.42475  | -0.12094 | -0.08424 |
| C                                                            | -0.02648 | -0.29634 | 2.68437 | H                                                           | -2.19756 | -2.08789 | 1.84511  | B                                                           | 0.03727  | 0.13318  | -2.99870 |
| H                                                            | -0.58995 | -0.83382 | 1.93626 | C                                                           | -2.67305 | -0.03002 | -0.73387 | H                                                           | 0.82139  | 1.00250  | -3.29531 |
| C                                                            | -0.46457 | 0.00374  | 3.99946 | C                                                           | -3.29826 | 1.19881  | -0.97949 | H                                                           | 0.47935  | -0.95688 | -3.31030 |
| H                                                            | -1.41948 | -0.26576 | 4.42564 | C                                                           | -4.54794 | 1.19100  | -1.58793 | H                                                           | -1.08754 | 0.31408  | -3.38943 |
| C                                                            | 0.56629  | 0.71768  | 4.65520 | H                                                           | -5.05235 | 2.12925  | -1.78408 | <b>S5 (C<sub>1</sub>): E<sub>tot</sub> = -2980.63295189</b> |          |          |          |
| H                                                            | 0.54169  | 1.10300  | 5.66425 | C                                                           | -5.15246 | 0.00621  | -1.96368 | C                                                           | 1.41677  | -0.70335 | -1.17879 |
| N                                                            | 2.84091  | 1.57930  | 3.97649 | H                                                           | -6.12409 | 0.01971  | -2.43976 | C                                                           | 0.97108  | -0.11509 | -2.39614 |
| H                                                            | 3.56687  | 0.98601  | 4.35433 | C                                                           | -4.50352 | -1.19484 | -1.74753 | H                                                           | 0.60904  | 0.89620  | -2.51254 |
| H                                                            | 2.10633  | 5.01911  | 2.94664 | H                                                           | -4.97354 | -2.11515 | -2.07122 | C                                                           | 1.03822  | -1.09578 | -3.41477 |
| <b>S2 (C<sub>2</sub>): E<sub>tot</sub> = -2048.79719499</b>  |          |          |         | C                                                           | -3.25729 | -1.23936 | -1.13234 | H                                                           | 0.75200  | -0.95754 | -4.44675 |
| C                                                            | 0.70771  | 3.69191  | 2.66465 | C                                                           | -2.65761 | 2.52912  | -0.64906 | C                                                           | 1.55941  | -2.28404 | -2.84599 |
| C                                                            | 0.20052  | 3.11129  | 1.46922 | H                                                           | -1.66604 | 2.34481  | -0.23355 | H                                                           | 1.73685  | -3.21253 | -3.36789 |
| H                                                            | 0.75720  | 2.96246  | 0.55444 | C                                                           | -2.45176 | 3.36601  | -1.91199 | C                                                           | 1.79250  | -2.04873 | -1.47243 |
| C                                                            | -1.15865 | 2.76739  | 1.68524 | H                                                           | -3.40000 | 3.64849  | -2.37174 | H                                                           | 2.16920  | -2.76939 | -0.76359 |
| H                                                            | -1.82268 | 2.32386  | 0.95849 | H                                                           | -1.87087 | 2.81915  | -2.65531 | C                                                           | 2.71249  | 0.21893  | 0.66038  |
| C                                                            | -1.48796 | 3.10895  | 3.01948 | H                                                           | -1.91626 | 4.28713  | -1.67534 | C                                                           | 3.31742  | 1.44909  | 0.34525  |
| H                                                            | -2.44871 | 2.97258  | 3.49309 | C                                                           | -3.45720 | 3.28876  | 0.40819  | C                                                           | 4.56083  | 1.74342  | 0.89131  |
| C                                                            | -0.34151 | 3.68513  | 3.62154 | H                                                           | -2.95689 | 4.22242  | 0.67157  | H                                                           | 5.04730  | 2.67886  | 0.64440  |
| H                                                            | -0.26706 | 4.05159  | 4.63512 | H                                                           | -3.57301 | 2.69875  | 1.31771  | C                                                           | 5.18989  | 0.86438  | 1.75360  |
| Fe                                                           | 0.06564  | 1.76574  | 2.99815 | H                                                           | -4.45558 | 3.54406  | 0.04908  | H                                                           | 6.15600  | 1.11223  | 2.17367  |
| N                                                            | 2.02756  | 4.10575  | 2.90582 | C                                                           | -2.56759 | -2.57868 | -0.97913 | C                                                           | 4.57605  | -0.32872 | 2.08041  |
| Si                                                           | 2.96088  | 3.21757  | 4.08318 | H                                                           | -1.67484 | -2.44308 | -0.36488 | H                                                           | 5.07159  | -1.00779 | 2.67376  |
| C                                                            | 1.76888  | 0.82618  | 3.66860 | C                                                           | -2.10740 | -3.09901 | -2.34265 | C                                                           | 3.33999  | -0.67664 | 1.54357  |
| C                                                            | 1.27493  | 0.20149  | 2.48997 | H                                                           | -1.46265 | -2.38169 | -2.85056 | C                                                           | 2.67204  | 2.44784  | -0.58968 |
| H                                                            | 1.80992  | 0.10414  | 1.55554 | H                                                           | -2.95919 | -3.29298 | -2.99676 | H                                                           | 1.62868  | 2.15730  | -0.72489 |
| C                                                            | -0.03535 | -0.27302 | 2.75538 | H                                                           | -1.55584 | -4.03460 | -2.23228 | C                                                           | 2.66896  | 3.86309  | -0.01417 |
| H                                                            | -0.66717 | -0.80820 | 2.06240 | C                                                           | -3.44812 | -3.60840 | -0.27166 | H                                                           | 3.67568  | 4.26802  | 0.09807  |
| C                                                            | -0.36501 | 0.07875  | 4.08686 | H                                                           | -2.88704 | -4.52603 | -0.08822 | H                                                           | 2.18584  | 3.89425  | 0.96259  |
| H                                                            | -1.29392 | -0.14047 | 4.59184 | H                                                           | -4.31854 | -3.88012 | -0.87030 | H                                                           | 2.12591  | 4.53916  | -0.67589 |
| C                                                            | 0.74793  | 0.74939  | 4.65284 | H                                                           | -3.81638 | -3.23920 | 0.68638  | C                                                           | 3.34946  | 2.41506  | -1.96050 |
| H                                                            | 0.81474  | 1.14370  | 5.65643 | Fe                                                          | 0.03229  | -0.53608 | 2.54980  | H                                                           | 2.84929  | 3.09160  | -2.65649 |
| N                                                            | 2.99545  | 1.49282  | 3.81813 | N                                                           | -1.40113 | -0.04704 | -0.06030 | H                                                           | 3.32900  | 1.41421  | -2.39102 |
| H                                                            | 3.73666  | 1.10501  | 3.25625 | Si                                                          | 0.00499  | 0.01814  | -1.04018 | H                                                           | 4.39354  | 2.72620  | -1.88982 |
| H                                                            | 2.49574  | 4.45897  | 2.08629 | C                                                           | 1.53598  | -0.61553 | 1.23477  | C                                                           | 2.74185  | -2.01075 | 1.93778  |
| H                                                            | 4.35648  | 3.71319  | 4.02293 | C                                                           | 1.21738  | -1.93376 | 1.66350  | H                                                           | 1.79353  | -2.13062 | 1.41100  |
| H                                                            | 2.35266  | 3.45601  | 5.41010 | H                                                           | 0.87225  | -2.73739 | 1.02821  | C                                                           | 2.44446  | -2.07115 | 3.43659  |
| <b>S3 (C<sub>s</sub>): E<sub>tot</sub> = -2048.7412703</b>   |          |          |         | C                                                           | 1.39929  | -1.99044 | 3.06621  | H                                                           | 1.78747  | -1.25932 | 3.74628  |
| C                                                            | 0.73912  | 3.70136  | 2.42750 | H                                                           | 1.22405  | -2.85212 | 3.69270  | H                                                           | 3.35777  | -2.00413 | 4.03014  |
| C                                                            | 0.29780  | 3.17517  | 1.18581 | C                                                           | 1.86354  | -0.72459 | 3.50147  | H                                                           | 1.95664  | -3.01316 | 3.69321  |
| H                                                            | 0.88725  | 3.08216  | 0.28418 | H                                                           | 2.10076  | -0.45201 | 4.51879  | C                                                           | 3.65319  | -3.17131 | 1.53244  |
| C                                                            | -1.05555 | 2.78799  | 1.34367 | C                                                           | 1.95359  | 0.12589  | 2.37533  | H                                                           | 3.15949  | -4.12792 | 1.71232  |
| H                                                            | -1.67942 | 2.35279  | 0.57776 | H                                                           | 2.27203  | 1.15753  | 2.37957  | H                                                           | 4.58082  | -3.17274 | 2.10695  |
| C                                                            | -1.44630 | 3.08400  | 2.67342 | C                                                           | 2.65667  | 0.30033  | -0.69315 | H                                                           | 3.92893  | -3.12389 | 0.47894  |
| H                                                            | -2.42087 | 2.90934  | 3.10333 | C                                                           | 3.49456  | -0.65345 | -1.28375 | Fe                                                          | -0.17824 | -1.71859 | -1.86988 |

|                                                             |          |          |          |                                                             |          |          |          |                                                             |          |          |          |
|-------------------------------------------------------------|----------|----------|----------|-------------------------------------------------------------|----------|----------|----------|-------------------------------------------------------------|----------|----------|----------|
| N                                                           | 1.43826  | -0.09574 | 0.09517  | C                                                           | 2.61890  | 6.82464  | 0.51202  | C                                                           | 3.58768  | 1.63404  | 0.37562  |
| Si                                                          | 0.04729  | 0.26894  | 1.08992  | H                                                           | 2.87434  | 5.86020  | 0.07120  | C                                                           | 3.69293  | -1.84604 | -1.22218 |
| C                                                           | -1.62219 | -1.12984 | -0.59014 | C                                                           | 3.56874  | 7.85017  | -0.10560 | H                                                           | 2.85307  | -2.20222 | -0.62188 |
| C                                                           | -1.23903 | -2.46637 | -0.29328 | H                                                           | 4.60497  | 7.64455  | 0.16375  | C                                                           | 3.21982  | -1.70004 | -2.67158 |
| H                                                           | -0.81423 | -2.81013 | 0.64020  | H                                                           | 3.33974  | 8.87039  | 0.20640  | H                                                           | 4.04103  | -1.37810 | -3.31398 |
| C                                                           | -1.47864 | -3.25695 | -1.44555 | H                                                           | 3.49477  | 7.82301  | -1.19381 | H                                                           | 2.42507  | -0.95890 | -2.77829 |
| H                                                           | -1.28124 | -4.31439 | -1.53929 | C                                                           | 1.16587  | 7.12901  | 0.14429  | H                                                           | 2.84242  | -2.64819 | -3.05964 |
| C                                                           | -2.04213 | -2.42236 | -2.44109 | H                                                           | 1.03987  | 7.15840  | -0.93947 | C                                                           | 4.76820  | -2.92456 | -1.12582 |
| H                                                           | -2.34567 | -2.73076 | -3.43019 | H                                                           | 0.85240  | 8.09664  | 0.54164  | H                                                           | 4.35048  | -3.89220 | -1.40640 |
| C                                                           | -2.12709 | -1.10897 | -1.91970 | H                                                           | 0.48942  | 6.37031  | 0.53776  | H                                                           | 5.15652  | -3.01079 | -0.11124 |
| H                                                           | -2.50394 | -0.23786 | -2.43445 | Fe                                                          | 1.12144  | 1.94087  | 1.46132  | H                                                           | 5.60878  | -2.73581 | -1.79541 |
| C                                                           | -2.58662 | 0.82027  | 0.45724  | N                                                           | 2.93817  | 4.29537  | 1.89606  | C                                                           | 2.60179  | 2.63279  | 0.93909  |
| C                                                           | -3.60438 | 0.36226  | 1.31027  | Si                                                          | 4.39837  | 3.56311  | 1.13771  | H                                                           | 1.63062  | 2.14269  | 1.01932  |
| C                                                           | -4.73144 | 1.15570  | 1.48828  | C                                                           | 2.82890  | 0.97018  | 1.99683  | C                                                           | 2.43653  | 3.80686  | -0.02522 |
| H                                                           | -5.53242 | 0.81164  | 2.13093  | C                                                           | 2.28809  | 0.38598  | 0.82197  | H                                                           | 2.12877  | 3.46193  | -1.01180 |
| C                                                           | -4.84606 | 2.38608  | 0.86674  | H                                                           | 2.76140  | 0.32212  | -0.14356 | H                                                           | 3.36759  | 4.36643  | -0.13859 |
| H                                                           | -5.72793 | 2.99376  | 1.02232  | C                                                           | 0.99342  | -0.09209 | 1.13575  | H                                                           | 1.66962  | 4.49438  | 0.33448  |
| C                                                           | -3.82689 | 2.83735  | 0.05000  | H                                                           | 0.32563  | -0.58819 | 0.44773  | C                                                           | 3.00121  | 3.13283  | 2.32679  |
| H                                                           | -3.92129 | 3.80447  | -0.42933 | C                                                           | 0.72434  | 0.20451  | 2.49346  | H                                                           | 2.22299  | 3.78054  | 2.73367  |
| C                                                           | -2.68994 | 2.06806  | -0.17609 | H                                                           | -0.18184 | -0.02905 | 3.03158  | H                                                           | 3.92486  | 3.71392  | 2.30468  |
| C                                                           | -3.51952 | -0.97409 | 2.01561  | C                                                           | 1.86093  | 0.85644  | 3.03083  | H                                                           | 3.15176  | 2.31337  | 3.03036  |
| H                                                           | -2.49338 | -1.33570 | 1.93842  | H                                                           | 1.96747  | 1.21364  | 4.04610  | Fe                                                          | -0.27563 | -0.70625 | 2.25199  |
| C                                                           | -3.83358 | -0.86388 | 3.50710  | C                                                           | 5.23493  | 0.63846  | 2.12320  | N                                                           | 1.82150  | -0.00353 | 0.00781  |
| H                                                           | -4.87246 | -0.58791 | 3.69379  | C                                                           | 5.84323  | 0.27882  | 0.91197  | Si                                                          | -0.92728 | 2.17900  | -0.65503 |
| H                                                           | -3.20000 | -0.12228 | 3.99418  | C                                                           | 6.92018  | -0.60359 | 0.95912  | C                                                           | -1.76403 | 0.42316  | 1.30457  |
| H                                                           | -3.66420 | -1.82314 | 3.99847  | H                                                           | 7.40799  | -0.88445 | 0.03448  | C                                                           | -1.17182 | 1.15138  | 2.36996  |
| C                                                           | -4.42684 | -2.00152 | 1.33721  | C                                                           | 7.38350  | -1.12752 | 2.14657  | H                                                           | -0.67723 | 2.10864  | 2.28969  |
| H                                                           | -4.33188 | -2.97735 | 1.81680  | H                                                           | 8.22226  | -1.81081 | 2.15329  | C                                                           | -1.36376 | 0.41435  | 3.56773  |
| H                                                           | -4.17476 | -2.12212 | 0.28386  | C                                                           | 6.76010  | -0.77687 | 3.32753  | H                                                           | -1.03463 | 0.71630  | 4.55101  |
| H                                                           | -5.47480 | -1.70135 | 1.39915  | H                                                           | 7.11376  | -1.20515 | 4.25603  | C                                                           | -2.06495 | -0.77005 | 3.24591  |
| C                                                           | -1.61904 | 2.60747  | -1.09807 | C                                                           | 5.68338  | 0.10068  | 3.34439  | H                                                           | -2.36388 | -1.54340 | 3.93786  |
| H                                                           | -0.82699 | 1.86069  | -1.16544 | C                                                           | 5.42250  | 0.75700  | -0.46425 | C                                                           | -2.29729 | -0.77646 | 1.84707  |
| C                                                           | -1.00200 | 3.89312  | -0.54946 | H                                                           | 4.56006  | 1.41743  | -0.37273 | H                                                           | -2.81718 | -1.54235 | 1.29037  |
| H                                                           | -0.58146 | 3.74232  | 0.44440  | C                                                           | 6.51902  | 1.59501  | -1.11882 | C                                                           | -2.98785 | 0.28362  | -0.74520 |
| H                                                           | -1.73873 | 4.69523  | -0.48027 | H                                                           | 7.43405  | 1.02096  | -1.27499 | C                                                           | -4.27016 | 0.81348  | -0.52414 |
| H                                                           | -0.19973 | 4.24260  | -1.20168 | H                                                           | 6.76171  | 2.46546  | -0.51058 | C                                                           | -5.33571 | 0.30457  | -1.25711 |
| C                                                           | -2.15197 | 2.83074  | -2.51354 | H                                                           | 6.18397  | 1.95943  | -2.09089 | H                                                           | -6.33105 | 0.70159  | -1.09730 |
| H                                                           | -1.34820 | 3.14800  | -3.18049 | C                                                           | 5.03363  | -0.41929 | -1.36420 | C                                                           | -5.14801 | -0.69390 | -2.19649 |
| H                                                           | -2.92077 | 3.60464  | -2.53927 | H                                                           | 4.60937  | -0.05222 | -2.30017 | H                                                           | -5.98805 | -1.07126 | -2.76490 |
| H                                                           | -2.58988 | 1.92292  | -2.92832 | H                                                           | 4.29949  | -1.07271 | -0.89186 | C                                                           | -3.88181 | -1.20793 | -2.40358 |
| N                                                           | -1.44432 | -0.00224 | 0.23013  | H                                                           | 5.89448  | -1.03770 | -1.62302 | H                                                           | -3.74256 | -1.99197 | -3.13821 |
| H                                                           | 0.11066  | -0.55443 | 2.32975  | C                                                           | 5.01907  | 0.35444  | 4.68652  | C                                                           | -2.78712 | -0.74235 | -1.68020 |
| H                                                           | 0.05758  | 1.69100  | 1.51150  | H                                                           | 4.35998  | 1.22546  | 4.63032  | C                                                           | -4.52780 | 1.92144  | 0.47419  |
| <b>S6 (C<sub>1</sub>): E<sub>tot</sub> = -2980.56273133</b> |          |          |          | C                                                           | 6.02431  | 0.67320  | 5.79257  | H                                                           | -3.58001 | 2.20989  | 0.92841  |
| C                                                           | 1.68604  | 3.89813  | 1.41079  | H                                                           | 6.67708  | 1.50038  | 5.51552  | C                                                           | -5.09235 | 3.16497  | -0.21255 |
| C                                                           | 1.37162  | 3.44727  | 0.09818  | H                                                           | 6.65272  | -0.18305 | 6.03815  | H                                                           | -6.06860 | 2.97697  | -0.66286 |
| H                                                           | 2.05435  | 3.42025  | -0.73869 | H                                                           | 5.49871  | 0.95077  | 6.70730  | H                                                           | -4.42349 | 3.51549  | -0.99940 |
| C                                                           | 0.02359  | 3.00746  | 0.09471  | C                                                           | 4.14470  | -0.84090 | 5.07153  | H                                                           | -5.21596 | 3.97550  | 0.50741  |
| H                                                           | -0.50696 | 2.60643  | -0.75628 | H                                                           | 3.61754  | -0.64890 | 6.00785  | C                                                           | -5.43545 | 1.44277  | 1.60664  |
| C                                                           | -0.50759 | 3.20222  | 1.39178  | H                                                           | 4.75381  | -1.73549 | 5.21040  | H                                                           | -5.57378 | 2.23381  | 2.34523  |
| H                                                           | -1.51429 | 2.97381  | 1.70866  | H                                                           | 3.40325  | -1.06059 | 4.30404  | H                                                           | -5.00137 | 0.58295  | 2.11687  |
| C                                                           | 0.51640  | 3.74564  | 2.20628  | N                                                           | 4.12268  | 1.57842  | 2.14762  | H                                                           | -6.42373 | 1.15640  | 1.24200  |
| H                                                           | 0.43228  | 4.00517  | 3.25153  | H                                                           | 4.12695  | 2.01444  | 3.06250  | C                                                           | -1.42801 | -1.35935 | -1.92550 |
| C                                                           | 2.94071  | 5.48896  | 2.67021  | H                                                           | 5.34209  | 3.95939  | 2.27067  | H                                                           | -0.74478 | -0.94540 | -1.18185 |
| C                                                           | 3.07742  | 5.44656  | 4.06565  | <b>S7 (C<sub>1</sub>): E<sub>tot</sub> = -3035.85089421</b> |          |          |          | C                                                           | -0.88991 | -1.00639 | -3.31244 |
| C                                                           | 3.05720  | 6.63760  | 4.78335  | C                                                           | 1.46563  | -0.80430 | 1.10241  | H                                                           | -0.80099 | 0.07190  | -3.44038 |
| H                                                           | 3.16871  | 6.61473  | 5.86114  | C                                                           | 0.76295  | -2.03565 | 1.06191  | H                                                           | -1.54191 | -1.38554 | -4.10161 |
| C                                                           | 2.88500  | 7.85298  | 4.14891  | H                                                           | 0.39139  | -2.52472 | 0.17350  | H                                                           | 0.09758  | -1.44591 | -3.46878 |
| H                                                           | 2.86187  | 8.76993  | 4.72321  | C                                                           | 0.64592  | -2.52509 | 2.38929  | C                                                           | -1.45962 | -2.87452 | -1.72777 |
| C                                                           | 2.74394  | 7.88760  | 2.77379  | H                                                           | 0.16736  | -3.44773 | 2.68257  | H                                                           | -0.46071 | -3.29912 | -1.84881 |
| H                                                           | 2.60930  | 8.84281  | 2.28104  | C                                                           | 1.27806  | -1.59777 | 3.24849  | H                                                           | -2.10458 | -3.36853 | -2.45590 |
| C                                                           | 2.78070  | 6.72393  | 2.01438  | H                                                           | 1.36334  | -1.67856 | 4.32197  | H                                                           | -1.82008 | -3.13859 | -0.73307 |
| C                                                           | 3.25621  | 4.15083  | 4.81994  | C                                                           | 1.76534  | -0.52522 | 2.45930  | N                                                           | -1.88396 | 0.83294  | -0.03498 |
| H                                                           | 3.12928  | 3.34241  | 4.09706  | H                                                           | 2.29627  | 0.34039  | 2.82417  | N                                                           | -1.66736 | 2.38246  | -2.19547 |
| C                                                           | 4.65919  | 4.06229  | 5.41853  | C                                                           | 3.19477  | 0.37777  | -0.09794 | H                                                           | 1.45414  | -0.37043 | -0.85683 |
| H                                                           | 4.79545  | 3.13225  | 5.97234  | C                                                           | 4.12800  | -0.50210 | -0.67394 | H                                                           | -1.33374 | 3.10666  | -2.80993 |
| H                                                           | 4.84090  | 4.88208  | 6.11530  | C                                                           | 5.45133  | -0.09512 | -0.77711 | H                                                           | -2.44019 | 1.86923  | -2.59460 |
| H                                                           | 5.42239  | 4.11390  | 4.64160  | H                                                           | 6.18655  | -0.75255 | -1.22222 | <b>S8 (C<sub>1</sub>): E<sub>tot</sub> = -3035.82011005</b> |          |          |          |
| C                                                           | 2.19062  | 3.94944  | 5.89640  | C                                                           | 5.85487  | 1.14145  | -0.30136 | C                                                           | 1.36807  | -0.44270 | 1.50131  |
| H                                                           | 1.18420  | 4.01130  | 5.48165  | H                                                           | 6.89238  | 1.43955  | -0.37973 | C                                                           | 1.34701  | -1.85605 | 1.65356  |
| H                                                           | 2.26441  | 4.69487  | 6.68938  | C                                                           | 4.92986  | 1.99202  | 0.27011  | H                                                           | 1.27715  | -2.58330 | 0.85713  |
| H                                                           | 2.29942  | 2.96903  | 6.36547  | H                                                           | 5.25292  | 2.96108  | 0.63081  | C                                                           | 1.40917  | -2.14234 | 3.03819  |

|    |          |          |          |                                                                 |          |          |          |                                                                 |          |          |          |
|----|----------|----------|----------|-----------------------------------------------------------------|----------|----------|----------|-----------------------------------------------------------------|----------|----------|----------|
| H  | 1.40617  | -3.12758 | 3.47941  | H                                                               | -0.85462 | -3.93274 | -1.94105 | H                                                               | 2.62060  | -2.12896 | -3.42940 |
| C  | 1.47809  | -0.91316 | 3.73702  | H                                                               | -2.30280 | -3.56649 | -2.85996 | H                                                               | 2.89906  | -3.73228 | -2.74723 |
| H  | 1.53431  | -0.79290 | 4.80830  | H                                                               | -2.38740 | -3.66838 | -1.10690 | C                                                               | 4.02522  | -2.91091 | -0.34530 |
| C  | 1.44906  | 0.14041  | 2.79290  | N                                                               | -1.62786 | 0.23025  | 0.20590  | H                                                               | 3.74464  | -3.96572 | -0.33812 |
| H  | 1.47131  | 1.19297  | 3.02554  | N                                                               | -0.26668 | 2.32424  | -1.42272 | H                                                               | 3.92816  | -2.53027 | 0.67163  |
| C  | 2.60107  | 0.69264  | -0.25947 | H                                                               | 0.95002  | -0.42390 | -0.43081 | H                                                               | 5.07903  | -2.85224 | -0.62399 |
| C  | 3.30969  | -0.16119 | -1.12295 | H                                                               | -0.32652 | 2.23983  | 1.20624  | C                                                               | 2.08667  | 2.72537  | -0.08978 |
| C  | 4.55422  | 0.25062  | -1.58685 | H                                                               | -0.52404 | 2.03899  | -2.35108 | H                                                               | 1.30320  | 2.23025  | 0.48846  |
| H  | 5.11707  | -0.39720 | -2.24592 | <b>S12</b> (C <sub>1</sub> ): E <sub>tot</sub> = -3006.00793736 |          |          |          | C                                                               | 1.40264  | 3.53854  | -1.19048 |
| C  | 5.09506  | 1.46516  | -1.22022 | C                                                               | -1.48429 | -0.02660 | 1.35371  | H                                                               | 0.85060  | 2.90240  | -1.88299 |
| H  | 6.06320  | 1.76873  | -1.59555 | C                                                               | -1.16537 | 1.07234  | 2.20005  | H                                                               | 2.13383  | 4.09425  | -1.77998 |
| C  | 4.38654  | 2.28554  | -0.36898 | H                                                               | -0.82368 | 2.04428  | 1.87377  | H                                                               | 0.70449  | 4.26042  | -0.76171 |
| H  | 4.80785  | 3.24124  | -0.08525 | C                                                               | -1.33208 | 0.65162  | 3.54120  | C                                                               | 2.83164  | 3.64561  | 0.87706  |
| C  | 3.13977  | 1.92459  | 0.13194  | H                                                               | -1.15054 | 1.25251  | 4.41964  | H                                                               | 2.13282  | 4.32409  | 1.36873  |
| C  | 2.85103  | -1.54156 | -1.56102 | C                                                               | -1.78688 | -0.68986 | 3.52881  | H                                                               | 3.57172  | 4.26299  | 0.36648  |
| H  | 1.79884  | -1.70069 | -1.30366 | H                                                               | -2.00978 | -1.29179 | 4.39690  | H                                                               | 3.35595  | 3.08298  | 1.65051  |
| C  | 2.93759  | -1.72575 | -3.07637 | C                                                               | -1.88740 | -1.11110 | 2.18342  | N                                                               | 1.42475  | -0.12094 | -0.08424 |
| H  | 3.96898  | -1.72500 | -3.42889 | H                                                               | -2.19756 | -2.08789 | 1.84511  | B                                                               | 0.03727  | 0.13318  | -2.99870 |
| H  | 2.40291  | -0.93938 | -3.60728 | C                                                               | -2.67305 | -0.03002 | -0.73387 | H                                                               | 0.82139  | 1.00250  | -3.29531 |
| H  | 2.50546  | -2.68502 | -3.36492 | C                                                               | -3.29826 | 1.19881  | -0.97949 | H                                                               | 0.47935  | -0.95688 | -3.31030 |
| C  | 3.65914  | -2.62324 | -0.84036 | C                                                               | -4.54794 | 1.19100  | -1.58793 | H                                                               | -1.08754 | 0.31408  | -3.38943 |
| H  | 3.28492  | -3.61806 | -1.08924 | H                                                               | -5.05235 | 2.12925  | -1.78408 | <b>S14</b> (C <sub>1</sub> ): E <sub>tot</sub> = -3005.98879087 |          |          |          |
| H  | 3.62170  | -2.50404 | 0.24177  | C                                                               | -5.15246 | 0.00621  | -1.96368 | C                                                               | 1.39555  | -0.77867 | -1.12591 |
| H  | 4.70816  | -2.58233 | -1.13701 | H                                                               | -6.12409 | 0.01971  | -2.43976 | C                                                               | 1.01354  | -0.22387 | -2.38072 |
| C  | 2.47423  | 2.91551  | 1.06110  | C                                                               | -4.50352 | -1.19484 | -1.74753 | H                                                               | 0.70173  | 0.79676  | -2.54913 |
| H  | 1.54640  | 2.49014  | 1.43014  | H                                                               | -4.97354 | -2.11515 | -2.07122 | C                                                               | 1.07421  | -1.24557 | -3.35834 |
| C  | 2.09765  | 4.19746  | 0.31812  | C                                                               | -3.25729 | -1.23936 | -1.13234 | H                                                               | 0.82966  | -1.13732 | -4.40454 |
| H  | 1.43844  | 3.97571  | -0.52158 | C                                                               | -2.65761 | 2.52912  | -0.64906 | C                                                               | 1.52310  | -2.43120 | -2.72535 |
| H  | 2.98161  | 4.71708  | -0.05670 | H                                                               | -1.66604 | 2.34481  | -0.23355 | H                                                               | 1.67607  | -3.38705 | -3.20389 |
| H  | 1.57619  | 4.88132  | 0.99039  | C                                                               | -2.45176 | 3.36601  | -1.91199 | C                                                               | 1.72034  | -2.15004 | -1.35490 |
| C  | 3.34518  | 3.20687  | 2.28454  | H                                                               | -3.40000 | 3.64849  | -2.37174 | H                                                               | 2.04261  | -2.85794 | -0.60743 |
| H  | 2.80314  | 3.84073  | 2.98837  | H                                                               | -1.87087 | 2.81915  | -2.65531 | C                                                               | 2.70386  | 0.18004  | 0.67588  |
| H  | 4.26175  | 3.73544  | 2.01940  | H                                                               | -1.91626 | 4.28713  | -1.67534 | C                                                               | 3.36731  | 1.36590  | 0.30689  |
| H  | 3.63375  | 2.29192  | 2.80398  | C                                                               | -3.45720 | 3.28876  | 0.40819  | C                                                               | 4.61173  | 1.64107  | 0.85923  |
| Fe | -0.24083 | -0.99429 | 2.59664  | H                                                               | -2.95689 | 4.22242  | 0.67157  | H                                                               | 5.13771  | 2.54323  | 0.57344  |
| N  | 1.29402  | 0.25630  | 0.24283  | H                                                               | -3.57301 | 2.69875  | 1.31771  | C                                                               | 5.19402  | 0.78659  | 1.77736  |
| Si | -0.44373 | 1.50243  | -0.06650 | H                                                               | -4.45558 | 3.54406  | 0.04908  | H                                                               | 6.16072  | 1.02132  | 2.20353  |
| C  | -1.80129 | -0.36243 | 1.46902  | C                                                               | -2.56759 | -2.57868 | -0.97913 | C                                                               | 4.53350  | -0.36767 | 2.14498  |
| C  | -1.82462 | 0.29517  | 2.73280  | H                                                               | -1.67484 | -2.44308 | -0.36488 | H                                                               | 4.99519  | -1.03375 | 2.86388  |
| H  | -1.75142 | 1.36044  | 2.89335  | C                                                               | -2.10740 | -3.09901 | -2.34265 | C                                                               | 3.29435  | -0.69820 | 1.60211  |
| C  | -1.91954 | -0.69112 | 3.74352  | H                                                               | -1.46265 | -2.38169 | -2.85056 | C                                                               | 2.78751  | 2.33211  | -0.70142 |
| H  | -1.94675 | -0.50591 | 4.80715  | H                                                               | -2.95919 | -3.29298 | -2.99676 | H                                                               | 1.72639  | 2.09916  | -0.81268 |
| C  | -1.98816 | -1.95850 | 3.11611  | H                                                               | -1.55584 | -4.03460 | -2.23228 | C                                                               | 2.89027  | 3.78804  | -0.24973 |
| H  | -2.07580 | -2.91132 | 3.61659  | C                                                               | -3.44812 | -3.60840 | -0.27166 | H                                                               | 3.92432  | 4.13017  | -0.19043 |
| C  | -1.91317 | -1.76053 | 1.71726  | H                                                               | -2.88704 | -4.52603 | -0.08822 | H                                                               | 2.43246  | 3.94052  | 0.72751  |
| H  | -1.94020 | -2.53552 | 0.96549  | H                                                               | -4.31854 | -3.88012 | -0.87030 | H                                                               | 2.38442  | 4.44163  | -0.96208 |
| C  | -2.70447 | 0.05490  | -0.71567 | H                                                               | -3.81638 | -3.23920 | 0.68638  | C                                                               | 3.46166  | 2.14870  | -2.06298 |
| C  | -3.81367 | 0.91169  | -0.65349 | Fe                                                              | 0.03229  | -0.53608 | 2.54980  | H                                                               | 2.99974  | 2.79121  | -2.81561 |
| C  | -4.86445 | 0.70675  | -1.54044 | N                                                               | -1.40113 | -0.04704 | -0.06030 | H                                                               | 3.39235  | 1.11914  | -2.81155 |
| H  | -5.72702 | 1.36132  | -1.50582 | Si                                                              | 0.00499  | 0.01814  | -1.04018 | H                                                               | 4.52024  | 2.41074  | -2.00997 |
| C  | -4.82539 | -0.31145 | -2.47464 | C                                                               | 1.53598  | -0.61553 | 1.23477  | C                                                               | 2.66761  | -2.00859 | 2.03251  |
| H  | -5.65238 | -0.45564 | -3.15768 | C                                                               | 1.21738  | -1.93376 | 1.66350  | H                                                               | 1.72259  | -2.13195 | 1.50211  |
| C  | -3.71855 | -1.13686 | -2.54047 | H                                                               | 0.87225  | -2.73739 | 1.02821  | C                                                               | 2.35589  | -2.01994 | 3.52930  |
| H  | -3.68788 | -1.92017 | -3.28797 | C                                                               | 1.39929  | -1.99044 | 3.06621  | H                                                               | 1.70936  | -1.18906 | 3.80945  |
| C  | -2.64737 | -0.96982 | -1.66916 | H                                                               | 1.22405  | -2.85212 | 3.69270  | H                                                               | 3.26448  | -1.95009 | 4.12969  |
| C  | -3.89287 | 2.07387  | 0.31208  | C                                                               | 1.86354  | -0.72459 | 3.50147  | H                                                               | 1.84927  | -2.94522 | 3.80910  |
| H  | -3.01160 | 2.05386  | 0.95302  | H                                                               | 2.10076  | -0.45201 | 4.51879  | C                                                               | 3.56286  | -3.19597 | 1.66980  |
| C  | -3.86021 | 3.40322  | -0.44272 | C                                                               | 1.95359  | 0.12589  | 2.37533  | H                                                               | 3.05038  | -4.13810 | 1.87270  |
| H  | -4.71690 | 3.50944  | -1.11084 | H                                                               | 2.27203  | 1.15753  | 2.37957  | H                                                               | 4.48562  | -3.19762 | 2.25200  |
| H  | -2.94909 | 3.48475  | -1.03631 | C                                                               | 2.65667  | 0.30033  | -0.69315 | H                                                               | 3.84732  | -3.18337 | 0.61760  |
| H  | -3.88323 | 4.24070  | 0.25704  | C                                                               | 3.49456  | -0.65345 | -1.28375 | Fe                                                              | -0.22035 | -1.75414 | -1.83840 |
| C  | -5.10922 | 1.96624  | 1.22983  | C                                                               | 4.68934  | -0.21912 | -1.84558 | N                                                               | 1.41921  | -0.10575 | 0.11620  |
| H  | -5.11393 | 2.78333  | 1.95313  | H                                                               | 5.35730  | -0.93828 | -2.30290 | Si                                                              | 0.01687  | 0.19312  | 1.13957  |
| H  | -5.10258 | 1.02710  | 1.78375  | C                                                               | 5.03508  | 1.11938  | -1.84492 | C                                                               | -1.67258 | -1.09544 | -0.60345 |
| H  | -6.04701 | 2.01980  | 0.67420  | H                                                               | 5.96541  | 1.43917  | -2.29569 | C                                                               | -1.36805 | -2.45094 | -0.29999 |
| C  | -1.42802 | -1.84860 | -1.82817 | C                                                               | 4.18650  | 2.04995  | -1.27507 | H                                                               | -0.99030 | -2.81815 | 0.64434  |
| H  | -0.80872 | -1.72720 | -0.93503 | H                                                               | 4.46220  | 3.09700  | -1.29220 | C                                                               | -1.61106 | -3.22437 | -1.46304 |
| C  | -0.61350 | -1.38104 | -3.03417 | C                                                               | 2.98921  | 1.66250  | -0.68398 | H                                                               | -1.46522 | -4.29028 | -1.55560 |
| H  | -0.26443 | -0.35510 | -2.90030 | C                                                               | 3.15053  | -2.12540 | -1.32309 | C                                                               | -2.09702 | -2.35898 | -2.47324 |
| H  | -1.21356 | -1.40638 | -3.94514 | H                                                               | 2.11299  | -2.24275 | -1.00723 | H                                                               | -2.38236 | -2.64869 | -3.47338 |
| H  | 0.25482  | -2.02057 | -3.19568 | C                                                               | 3.24214  | -2.69653 | -2.73730 | C                                                               | -2.13144 | -1.04437 | -1.94882 |
| C  | -1.76686 | -3.33350 | -1.93901 | H                                                               | 4.26438  | -2.69326 | -3.11853 | H                                                               | -2.44591 | -0.15300 | -2.47166 |

|                                                              |          |          |          |                                                             |          |          |          |                                                              |          |          |          |
|--------------------------------------------------------------|----------|----------|----------|-------------------------------------------------------------|----------|----------|----------|--------------------------------------------------------------|----------|----------|----------|
| C                                                            | -2.57707 | 0.88934  | 0.41185  | H                                                           | 0.83957  | 4.91705  | -0.70663 | C                                                            | 3.59112  | 2.97409  | -0.56199 |
| C                                                            | -3.63718 | 0.48689  | 1.23995  | Fe                                                          | 1.34289  | 1.24703  | 2.26971  | H                                                            | 3.64368  | 3.81610  | -1.24165 |
| C                                                            | -4.72934 | 1.33424  | 1.38248  | N                                                           | 2.70551  | 3.93621  | 2.20615  | C                                                            | 2.54454  | 2.06261  | -0.67455 |
| H                                                            | -5.56121 | 1.03459  | 2.00804  | Si                                                          | 4.41171  | 3.50545  | 2.44320  | C                                                            | 3.49729  | -0.36633 | 2.14811  |
| C                                                            | -4.77012 | 2.56379  | 0.74946  | C                                                           | 3.15726  | 0.77607  | 3.02047  | H                                                            | 2.49423  | -0.79482 | 2.16926  |
| H                                                            | -5.62529 | 3.21415  | 0.87927  | C                                                           | 2.77433  | -0.19412 | 2.05295  | C                                                            | 4.46085  | -1.44131 | 1.63864  |
| C                                                            | -3.71127 | 2.95877  | -0.04564 | H                                                           | 3.31999  | -0.44966 | 1.15853  | H                                                            | 4.21267  | -1.76453 | 0.62793  |
| H                                                            | -3.74726 | 3.92521  | -0.53436 | C                                                           | 1.56793  | -0.79306 | 2.48545  | H                                                            | 4.43377  | -2.31929 | 2.28632  |
| C                                                            | -2.60884 | 2.13189  | -0.23637 | H                                                           | 1.02658  | -1.56597 | 1.96106  | H                                                            | 5.48709  | -1.06862 | 1.62785  |
| C                                                            | -3.62825 | -0.84282 | 1.96190  | C                                                           | 1.20164  | -0.20082 | 3.71656  | C                                                            | 3.83260  | 0.02551  | 3.58566  |
| H                                                            | -2.61946 | -1.25337 | 1.90476  | H                                                           | 0.32646  | -0.43646 | 4.30339  | H                                                            | 4.86438  | 0.36350  | 3.69489  |
| C                                                            | -3.95895 | -0.69669 | 3.44665  | C                                                           | 2.18426  | 0.76179  | 4.05618  | H                                                            | 3.71102  | -0.83764 | 4.24144  |
| H                                                            | -4.98615 | -0.36878 | 3.61330  | H                                                           | 2.17758  | 1.38567  | 4.93517  | H                                                            | 3.17171  | 0.81339  | 3.94459  |
| H                                                            | -3.29798 | 0.02148  | 3.93269  | C                                                           | 5.44503  | 0.75870  | 2.36321  | C                                                            | 1.53149  | 2.26402  | -1.78199 |
| H                                                            | -3.84245 | -1.65551 | 3.95401  | C                                                           | 5.81472  | 0.92173  | 1.01790  | H                                                            | 0.78970  | 1.46632  | -1.70986 |
| C                                                            | -4.57266 | -1.83446 | 1.28128  | C                                                           | 6.89982  | 0.18933  | 0.53829  | C                                                            | 0.80212  | 3.60163  | -1.66134 |
| H                                                            | -4.53231 | -2.80732 | 1.77440  | H                                                           | 7.21523  | 0.32654  | -0.48830 | H                                                            | 0.27887  | 3.70840  | -0.71088 |
| H                                                            | -4.30838 | -1.98049 | 0.23405  | C                                                           | 7.57234  | -0.71598 | 1.32916  | H                                                            | 0.05922  | 3.70541  | -2.45354 |
| H                                                            | -5.60616 | -1.48448 | 1.32115  | H                                                           | 8.41463  | -1.26875 | 0.93475  | H                                                            | 1.48874  | 4.44482  | -1.74671 |
| C                                                            | -1.47730 | 2.60843  | -1.11785 | C                                                           | 7.13286  | -0.93406 | 2.61994  | C                                                            | 2.18929  | 2.16749  | -3.16027 |
| H                                                            | -0.76902 | 1.78605  | -1.22725 | H                                                           | 7.62615  | -1.68238 | 3.22724  | H                                                            | 2.88072  | 2.99403  | -3.33102 |
| C                                                            | -0.74017 | 3.77898  | -0.47220 | C                                                           | 6.06600  | -0.22420 | 3.15539  | H                                                            | 1.43649  | 2.20282  | -3.94974 |
| H                                                            | -0.32351 | 3.51547  | 0.50634  | C                                                           | 5.10015  | 1.78418  | -0.00710 | H                                                            | 2.75699  | 1.24578  | -3.27987 |
| H                                                            | -1.40037 | 4.63206  | -0.30858 | H                                                           | 4.23398  | 2.26413  | 0.45656  | C                                                            | -2.75305 | 0.23681  | 0.43350  |
| H                                                            | 0.09306  | 4.11213  | -1.09165 | C                                                           | 6.00469  | 2.88118  | -0.56588 | C                                                            | -3.41087 | -0.44418 | 1.47331  |
| C                                                            | -1.95370 | 2.98319  | -2.52067 | H                                                           | 6.83704  | 2.45782  | -1.12972 | C                                                            | -4.65836 | 0.01464  | 1.88607  |
| H                                                            | -1.10482 | 3.23682  | -3.15807 | H                                                           | 6.41431  | 3.50279  | 0.22834  | H                                                            | -5.17115 | -0.49420 | 2.69285  |
| H                                                            | -2.62115 | 3.84615  | -2.51095 | H                                                           | 5.44662  | 3.52771  | -1.24470 | C                                                            | -5.26048 | 1.10210  | 1.28663  |
| H                                                            | -2.49054 | 2.15998  | -2.99239 | C                                                           | 4.52630  | 0.94103  | -1.14964 | H                                                            | -6.23405 | 1.43768  | 1.61879  |
| N                                                            | -1.46500 | 0.01974  | 0.22601  | H                                                           | 3.97257  | 1.57778  | -1.84229 | C                                                            | -4.61035 | 1.76150  | 0.26605  |
| B                                                            | 0.05836  | 1.96243  | 2.09173  | H                                                           | 3.84368  | 0.17197  | -0.79007 | H                                                            | -5.09147 | 2.61126  | -0.20672 |
| H                                                            | -0.91562 | 2.36154  | 2.65202  | H                                                           | 5.30981  | 0.44475  | -1.72291 | C                                                            | -3.35411 | 1.35574  | -0.17444 |
| H                                                            | 1.06321  | 2.58868  | 2.23001  | C                                                           | 5.60114  | -0.62688 | 4.54211  | C                                                            | -2.84792 | -1.66564 | 2.16985  |
| H                                                            | 0.01059  | -0.82341 | 2.24567  | H                                                           | 4.80561  | 0.03424  | 4.87253  | H                                                            | -1.88851 | -1.91474 | 1.71615  |
| <b>S11 (C<sub>1</sub>): E<sub>tot</sub> = -3005.97389598</b> |          |          |          | C                                                           | 6.71625  | -0.51944 | 5.58038  | C                                                            | -3.76763 | -2.87530 | 1.98864  |
| C                                                            | 1.57611  | 3.18295  | 1.83317  | H                                                           | 7.13016  | 0.48772  | 5.60870  | H                                                            | -4.71937 | -2.73905 | 2.50417  |
| C                                                            | 1.40698  | 2.44321  | 0.62573  | H                                                           | 7.53402  | -1.21470 | 5.38443  | H                                                            | -3.30275 | -3.77228 | 2.40145  |
| H                                                            | 2.12140  | 2.37266  | -0.18143 | H                                                           | 6.32739  | -0.74960 | 6.57327  | H                                                            | -3.99247 | -3.06100 | 0.93787  |
| C                                                            | 0.15308  | 1.78929  | 0.67893  | C                                                           | 5.00275  | -2.03477 | 4.50531  | C                                                            | -2.59175 | -1.39833 | 3.65335  |
| H                                                            | -0.25424 | 1.13744  | -0.07951 | H                                                           | 4.62508  | -2.30979 | 5.49140  | H                                                            | -1.93255 | -0.54319 | 3.80263  |
| C                                                            | -0.47714 | 2.14849  | 1.89571  | H                                                           | 5.74024  | -2.78445 | 4.21304  | H                                                            | -2.12733 | -2.26764 | 4.12195  |
| H                                                            | -1.44721 | 1.81239  | 2.23048  | H                                                           | 4.17034  | -2.08986 | 3.80329  | H                                                            | -3.52044 | -1.19633 | 4.18983  |
| C                                                            | 0.39080  | 3.01083  | 2.60428  | N                                                           | 4.37120  | 1.55866  | 2.96277  | C                                                            | -2.70135 | 2.11388  | -1.31021 |
| H                                                            | 0.20338  | 3.44081  | 3.57644  | B                                                           | 4.77158  | 2.26942  | 4.34919  | H                                                            | -1.65081 | 1.81806  | -1.35586 |
| C                                                            | 2.50532  | 5.35741  | 2.23172  | H                                                           | 5.96019  | 2.34906  | 4.46569  | C                                                            | -3.35219 | 1.74174  | -2.64379 |
| C                                                            | 2.23226  | 6.00015  | 3.45082  | H                                                           | 4.37120  | 3.47229  | 4.20235  | H                                                            | -3.32578 | 0.66647  | -2.81614 |
| C                                                            | 2.03291  | 7.37712  | 3.45036  | H                                                           | 4.16787  | 1.91152  | 5.31564  | H                                                            | -2.84102 | 2.23045  | -3.47578 |
| H                                                            | 1.82575  | 7.88737  | 4.38321  | <b>S9 (C<sub>1</sub>): E<sub>tot</sub> = -3062.49810415</b> |          |          |          | H                                                            | -4.39730 | 2.05578  | -2.66772 |
| C                                                            | 2.09106  | 8.10829  | 2.27990  | C                                                           | 1.69363  | -1.20671 | -0.46659 | C                                                            | -2.74310 | 3.62761  | -1.10055 |
| H                                                            | 1.92525  | 9.17759  | 2.29746  | C                                                           | 1.43696  | -2.48816 | 0.09730  | H                                                            | -3.76044 | 4.01935  | -1.12089 |
| C                                                            | 2.37016  | 7.46822  | 1.08657  | H                                                           | 1.08317  | -2.68177 | 1.10036  | H                                                            | -2.19155 | 4.13682  | -1.89115 |
| H                                                            | 2.42153  | 8.05038  | 0.17463  | C                                                           | 1.70877  | -3.46372 | -0.89310 | H                                                            | -2.30167 | 3.92279  | -0.14707 |
| C                                                            | 2.59286  | 6.09721  | 1.03944  | H                                                           | 1.60183  | -4.53148 | -0.77393 | H                                                            | 0.46540  | 2.48753  | 1.08051  |
| C                                                            | 2.15651  | 5.26201  | 4.77067  | C                                                           | 2.16834  | -2.79580 | -2.05303 | H                                                            | -1.13485 | 2.28055  | 1.34086  |
| H                                                            | 2.25338  | 4.19309  | 4.57236  | H                                                           | 2.46891  | -3.26408 | -2.97820 | Fe                                                           | 0.26872  | -2.14305 | -1.54967 |
| C                                                            | 3.30845  | 5.66804  | 5.69153  | C                                                           | 2.15430  | -1.40395 | -1.79663 | N                                                            | 1.42498  | 0.03904  | 0.13721  |
| H                                                            | 3.29971  | 5.07242  | 6.60565  | H                                                           | 2.43893  | -0.62674 | -2.48819 | N                                                            | -1.45489 | -0.17941 | -0.00826 |
| H                                                            | 3.23633  | 6.71864  | 5.97873  | C                                                           | -1.39546 | -1.09925 | -1.08333 | H                                                            | 0.07550  | 3.21243  | 3.42443  |
| H                                                            | 4.27706  | 5.52585  | 5.21227  | C                                                           | -1.67096 | -2.49884 | -1.02109 | H                                                            | 1.10712  | 1.48073  | 3.39433  |
| C                                                            | 0.81441  | 5.48192  | 5.47070  | H                                                           | -1.98955 | -3.04567 | -0.14742 | H                                                            | -0.87364 | 1.45612  | 3.72017  |
| H                                                            | -0.02793 | 5.24305  | 4.82082  | C                                                           | -1.43406 | -3.05212 | -2.29863 | Si                                                           | -0.07658 | 0.17606  | 0.99934  |
| H                                                            | 0.68888  | 6.51691  | 5.79229  | H                                                           | -1.54520 | -4.09183 | -2.56802 | H                                                            | -0.07721 | -0.64948 | 2.22049  |
| H                                                            | 0.74252  | 4.85622  | 6.36180  | C                                                           | -1.01105 | -2.00984 | -3.16028 | B                                                            | 0.04698  | 2.02871  | 3.18102  |
| C                                                            | 2.90758  | 5.45835  | -0.29490 | H                                                           | -0.74675 | -2.11501 | -4.20193 | N                                                            | -0.21698 | 1.89233  | 1.54407  |
| H                                                            | 3.20894  | 4.42549  | -0.11504 | C                                                           | -1.00261 | -0.80450 | -2.41929 | <b>S10 (C<sub>1</sub>): E<sub>tot</sub> = -3062.40913285</b> |          |          |          |
| C                                                            | 4.08137  | 6.14371  | -0.99288 | H                                                           | -0.71866 | 0.16882  | -2.79219 | C                                                            | 1.50360  | 3.76727  | 1.66527  |
| H                                                            | 4.96873  | 6.14699  | -0.35985 | C                                                           | 2.49447  | 0.98287  | 0.22215  | C                                                            | 1.12983  | 3.49085  | 0.31787  |
| H                                                            | 3.85669  | 7.17698  | -1.26095 | C                                                           | 3.48979  | 0.81367  | 1.20090  | H                                                            | 1.77866  | 3.59077  | -0.53994 |
| H                                                            | 4.33044  | 5.62110  | -1.91823 | C                                                           | 4.52333  | 1.73986  | 1.26041  | C                                                            | -0.19683 | 2.99443  | 0.31570  |
| C                                                            | 1.66869  | 5.43275  | -1.19059 | H                                                           | 5.30045  | 1.62546  | 2.00487  | H                                                            | -0.75495 | 2.68677  | -0.55646 |
| H                                                            | 1.88126  | 4.92086  | -2.13126 | C                                                           | 4.57453  | 2.81697  | 0.39410  | C                                                            | -0.66476 | 2.98000  | 1.65154  |
| H                                                            | 1.33631  | 6.44366  | -1.43414 | H                                                           | 5.38294  | 3.53275  | 0.46503  | H                                                            | -1.64255 | 2.66146  | 1.98142  |

|    |          |          |          |                                                               |          |          |          |                                                                                      |          |          |          |
|----|----------|----------|----------|---------------------------------------------------------------|----------|----------|----------|--------------------------------------------------------------------------------------|----------|----------|----------|
| C  | 0.38036  | 3.45108  | 2.48395  | N                                                             | 4.04011  | 1.53452  | 2.07765  | C                                                                                    | 2.63200  | 1.93676  | 3.87186  |
| H  | 0.33816  | 3.53746  | 3.55823  | H                                                             | 3.97899  | 1.94995  | 3.00182  | H                                                                                    | 2.01409  | 1.11258  | 4.21715  |
| C  | 2.88686  | 5.33075  | 2.86006  | B                                                             | 5.81586  | 3.90170  | 2.46464  | H                                                                                    | 2.17730  | 2.86216  | 4.22836  |
| C  | 2.99688  | 5.32958  | 4.26574  | H                                                             | 6.84300  | 3.48754  | 1.96757  | H                                                                                    | 3.61512  | 1.86130  | 4.34043  |
| C  | 3.23380  | 6.53113  | 4.93020  | H                                                             | 5.68764  | 3.43363  | 3.58196  | C                                                                                    | 2.75345  | -1.84492 | -1.10279 |
| H  | 3.33059  | 6.53328  | 6.00962  | N                                                             | 6.05312  | 5.50396  | 2.70128  | H                                                                                    | 1.70385  | -1.56645 | -1.22357 |
| C  | 3.32307  | 7.72994  | 4.24539  | H                                                             | 6.93914  | 5.67548  | 3.16353  | C                                                                                    | 3.48903  | -1.37639 | -2.36043 |
| H  | 3.50281  | 8.65336  | 4.78062  | H                                                             | 5.31671  | 5.90130  | 3.27981  | H                                                                                    | 3.43120  | -0.29506 | -2.47402 |
| C  | 3.15370  | 7.73791  | 2.87195  | H                                                             | 6.05650  | 6.02396  | 1.82963  | H                                                                                    | 3.06205  | -1.83344 | -3.25563 |
| H  | 3.19204  | 8.68193  | 2.34188  | <b>S13 (C<sub>1</sub>):</b> E <sub>tot</sub> = -3062.47254885 |          |          | H        | 4.54421                                                                              | -1.65194 | -2.31675 |          |
| C  | 2.93813  | 6.55975  | 2.16339  | C                                                             | -1.76620 | 1.21874  | -0.43136 | C                                                                                    | 2.82807  | -3.36870 | -0.99031 |
| C  | 2.79655  | 4.08303  | 5.09780  | C                                                             | -1.53889 | 2.47089  | 0.20695  | H                                                                                    | 3.85666  | -3.72974 | -0.98924 |
| H  | 2.67488  | 3.24625  | 4.40570  | H                                                             | -1.19119 | 2.60811  | 1.22317  | H                                                                                    | 2.33059  | -3.83879 | -1.83929 |
| C  | 3.97843  | 3.78186  | 6.01584  | C                                                             | -1.82109 | 3.49784  | -0.72722 | H                                                                                    | 2.36131  | -3.74807 | -0.07851 |
| H  | 3.80067  | 2.86192  | 6.57630  | H                                                             | -1.73073 | 4.55851  | -0.54652 | H                                                                                    | 0.94199  | -2.27625 | 1.83112  |
| H  | 4.13168  | 4.57519  | 6.74996  | C                                                             | -2.26377 | 2.89076  | -1.92669 | H                                                                                    | -0.64630 | -2.52168 | 1.51159  |
| H  | 4.90101  | 3.65961  | 5.45106  | H                                                             | -2.56808 | 3.40669  | -2.82493 | Fe                                                                                   | -0.35767 | 2.23438  | -1.44231 |
| C  | 1.51918  | 4.20220  | 5.93500  | C                                                             | -2.22769 | 1.48650  | -1.74986 | N                                                                                    | -1.45971 | -0.04922 | 0.09815  |
| H  | 0.65733  | 4.49218  | 5.33520  | H                                                             | -2.49722 | 0.74796  | -2.48745 | N                                                                                    | 1.35719  | 0.36222  | 0.20820  |
| H  | 1.63017  | 4.95564  | 6.71701  | C                                                             | 1.30928  | 1.24165  | -0.90053 | Si                                                                                   | -0.04384 | -0.13997 | 1.16582  |
| H  | 1.28863  | 3.25457  | 6.42530  | C                                                             | 1.54610  | 2.65048  | -0.86647 | N                                                                                    | 0.20346  | -2.08866 | 1.15614  |
| C  | 2.71847  | 6.64151  | 0.66611  | H                                                             | 1.80439  | 3.22710  | 0.00667  | H                                                                                    | 0.75871  | -0.48110 | 3.60938  |
| H  | 2.80470  | 5.63895  | 0.24651  | C                                                             | 1.34161  | 3.16926  | -2.16436 | H                                                                                    | -0.44934 | 1.13535  | 3.52091  |
| C  | 3.76311  | 7.49541  | -0.04920 | H                                                             | 1.43608  | 4.20521  | -2.45390 | H                                                                                    | -1.19254 | -0.71878 | 3.31379  |
| H  | 4.77530  | 7.12717  | 0.13198  | C                                                             | 0.97029  | 2.09788  | -3.01351 | H                                                                                    | 0.44857  | -2.52362 | 0.27256  |
| H  | 3.73061  | 8.54485  | 0.24781  | H                                                             | 0.73691  | 2.17149  | -4.06527 | B                                                                                    | -0.23612 | 0.01692  | 3.11341  |
| H  | 3.60072  | 7.46061  | -1.12700 | C                                                             | 0.96606  | 0.90996  | -2.24319 | <b>NH<sub>3</sub> (C<sub>3</sub>):</b> E <sub>tot</sub> = -56.42815156               |          |          |          |
| C  | 1.30399  | 7.14495  | 0.37466  | H                                                             | 0.70857  | -0.07442 | -2.60645 | N                                                                                    | 0.01434  | 0.02491  | 1.03017  |
| H  | 1.11447  | 7.16348  | -0.69997 | C                                                             | -2.51594 | -1.00719 | 0.14418  | H                                                                                    | -0.94389 | -0.01349 | 1.34546  |
| H  | 1.15484  | 8.15644  | 0.75856  | C                                                             | -3.58444 | -0.84553 | 1.04880  | H                                                                                    | 0.46024  | -0.82416 | 1.34538  |
| Fe | 0.55662  | 6.49769  | 0.83292  | C                                                             | -4.59502 | -1.80078 | 1.06346  | H                                                                                    | -0.00775 | -0.01354 | 0.02163  |
| N  | 1.01906  | 1.80322  | 1.46748  | H                                                             | -5.42397 | -1.68608 | 1.74989  | <b>H<sub>2</sub>O (C<sub>2</sub>):</b> E <sub>tot</sub> = -76.25805141               |          |          |          |
| N  | 2.77919  | 4.12124  | 2.13305  | C                                                             | -4.56442 | -2.89958 | 0.22510  | O                                                                                    | 0.00000  | 0.05858  | 0.05858  |
| Si | 4.23942  | 3.50739  | 1.17547  | H                                                             | -5.35928 | -3.63321 | 0.25924  | H                                                                                    | 0.00000  | -0.06632 | 1.00773  |
| C  | 2.78805  | 0.86872  | 1.83316  | C                                                             | -3.51736 | -3.04937 | -0.66298 | H                                                                                    | 0.00000  | 1.00773  | -0.06632 |
| C  | 2.27136  | 0.45518  | 0.57828  | H                                                             | -3.50984 | -3.90222 | -1.33103 | <b>BH<sub>3</sub>NH<sub>3</sub> (C<sub>3</sub>):</b> E <sub>tot</sub> = -83.0248408  |          |          |          |
| H  | 2.73349  | 0.59971  | -0.38433 | C                                                             | -2.48908 | -2.11333 | -0.72842 | N                                                                                    | 0.67105  | -0.21527 | 0.65169  |
| C  | 1.01371  | -0.15146 | 0.80966  | C                                                             | -3.70378 | 0.35742  | 1.95956  | H                                                                                    | 0.66987  | -0.74876 | 1.51318  |
| H  | 0.36870  | -0.56703 | 0.05019  | H                                                             | -2.72341 | 0.82264  | 2.05001  | H                                                                                    | 0.02841  | 0.56045  | 0.76152  |
| C  | 0.74347  | -0.10359 | 2.19892  | C                                                             | -4.67018 | 1.37797  | 1.35280  | H                                                                                    | 0.31962  | -0.81205 | -0.08799 |
| H  | -0.13996 | -0.48144 | 2.69106  | H                                                             | -4.36466 | 1.68398  | 0.35273  | B                                                                                    | 2.19787  | 0.32879  | 0.29688  |
| C  | 1.84361  | 0.52086  | 2.83565  | H                                                             | -4.71751 | 2.27377  | 1.97413  | H                                                                                    | 2.51810  | 1.02286  | 1.23338  |
| H  | 1.94130  | 0.71150  | 3.89538  | H                                                             | -5.67981 | 0.96712  | 1.28390  | H                                                                                    | 2.08799  | 0.94583  | -0.73678 |
| C  | 5.17948  | 0.62605  | 2.08603  | C                                                             | -4.12992 | -0.00910 | 3.37939  | H                                                                                    | 2.87687  | -0.66537 | 0.18759  |
| C  | 5.81501  | 0.27520  | 0.88700  | H                                                             | -5.15401 | -0.38388 | 3.42771  | <b>BH<sub>2</sub>NH<sub>2</sub> (C<sub>2</sub>):</b> E <sub>tot</sub> = -81.84862721 |          |          |          |
| C  | 6.87077  | -0.62975 | 0.94450  | H                                                             | -4.08187 | 0.87547  | 4.01498  | N                                                                                    | 3.36822  | 0.35251  | 7.51437  |
| H  | 7.37260  | -0.90838 | 0.02654  | H                                                             | -3.46514 | -0.75554 | 3.81143  | B                                                                                    | 2.12712  | 0.07720  | 8.07042  |
| C  | 7.30059  | -1.17308 | 2.13681  | C                                                             | -1.42171 | -2.30194 | -1.78810 | H                                                                                    | 3.58645  | 1.22047  | 7.05820  |
| H  | 8.12206  | -1.87705 | 2.15429  | H                                                             | -0.63817 | -1.56175 | -1.61074 | H                                                                                    | 4.13443  | -0.29692 | 7.52913  |
| C  | 6.67508  | -0.80127 | 3.30926  | C                                                             | -0.79875 | -3.70066 | -1.76882 | H                                                                                    | 1.26416  | 0.90113  | 8.01327  |
| H  | 7.01587  | -1.22539 | 4.24517  | H                                                             | -0.45073 | -4.01036 | -0.78163 | H                                                                                    | 1.94259  | -0.97900 | 8.59690  |
| C  | 5.61501  | 0.09791  | 3.31328  | H                                                             | 0.05083  | -3.75000 | -2.45112 | <b>H<sub>2</sub> (D<sub>∞h</sub>):</b> E <sub>tot</sub> = -1.16803293                |          |          |          |
| C  | 5.46375  | 0.82771  | -0.47885 | H                                                             | -1.51018 | -4.46144 | -2.09209 | H                                                                                    | 0.00000  | 0.00000  | 0.00000  |
| H  | 4.60982  | 1.50158  | -0.39085 | C                                                             | -1.98601 | -2.04371 | -3.18717 | H                                                                                    | 0.00000  | 0.00000  | 0.74000  |
| C  | 6.60260  | 1.69089  | -1.02054 | H                                                             | -2.75630 | -2.77430 | -3.43950 | <b>TS1 (C<sub>1</sub>):</b> E <sub>tot</sub> = -3092.27494143                        |          |          |          |
| H  | 7.51354  | 1.11132  | -1.18297 | H                                                             | -1.20058 | -2.11532 | -3.94198 | C                                                                                    | -0.75816 | 1.16408  | 1.24339  |
| H  | 6.83500  | 2.50184  | -0.33096 | H                                                             | -2.43708 | -1.05774 | -3.26939 | C                                                                                    | 0.44696  | 1.59319  | 1.87408  |
| H  | 6.31442  | 2.13724  | -1.97351 | C                                                             | 2.65043  | -0.01684 | 0.69517  | H                                                                                    | 1.37062  | 1.83455  | 1.36812  |
| C  | 5.10104  | -0.28433 | -1.46409 | C                                                             | 3.26531  | 0.67645  | 1.75586  | C                                                                                    | 0.25216  | 1.58740  | 3.27642  |
| H  | 4.74334  | 0.14522  | -2.40147 | C                                                             | 4.48490  | 0.21040  | 2.23991  | H                                                                                    | 0.99072  | 1.84695  | 4.02038  |
| H  | 4.32114  | -0.93725 | -1.07087 | H                                                             | 4.96169  | 0.73131  | 3.06054  | C                                                                                    | -1.08363 | 1.19077  | 3.53047  |
| H  | 5.95922  | -0.91360 | -1.70667 | C                                                             | 5.10980  | -0.89152 | 1.69261  | H                                                                                    | -1.54257 | 1.09198  | 4.50303  |
| C  | 4.99761  | 0.41680  | 4.66308  | H                                                             | 6.05880  | -1.23220 | 2.08565  | C                                                                                    | -1.70658 | 0.92909  | 2.28820  |
| H  | 4.27047  | 1.22819  | 4.57188  | C                                                             | 4.52198  | -1.54491 | 0.62648  | H                                                                                    | -2.71802 | 0.57755  | 2.15933  |
| C  | 6.04674  | 0.91503  | 5.65633  | H                                                             | 5.03130  | -2.39050 | 0.18151  | C                                                                                    | -1.70662 | 1.92780  | -0.84636 |
| H  | 6.57920  | 1.77848  | 5.25866  | C                                                             | 3.29792  | -1.12829 | 0.11573  | C                                                                                    | -1.05409 | 3.04494  | -1.41416 |
| H  | 6.78190  | 0.14584  | 5.89437  | C                                                             | 2.72678  | 1.96203  | 2.34719  | C                                                                                    | -1.77662 | 3.92013  | -2.22127 |
| H  | 5.57309  | 1.20898  | 6.59377  | H                                                             | 1.71681  | 2.12311  | 1.96733  | H                                                                                    | -1.28332 | 4.78230  | -2.65236 |
| C  | 4.24420  | -0.79415 | 5.21548  | C                                                             | 3.61514  | 3.13249  | 1.90765  | C                                                                                    | -3.12219 | 3.71945  | -2.47856 |
| H  | 3.74388  | -0.54321 | 6.15277  | H                                                             | 4.59564  | 3.07526  | 2.38408  | H                                                                                    | -3.66732 | 4.40942  | -3.11014 |
| H  | 4.92579  | -1.62162 | 5.41806  | H                                                             | 3.16823  | 4.08536  | 2.19827  | C                                                                                    | -3.76790 | 2.64626  | -1.89419 |
| H  | 3.49255  | -1.15379 | 4.51308  | H                                                             | 3.78380  | 3.14696  | 0.83119  | H                                                                                    | -4.82778 | 2.50891  | -2.07212 |

|                                                             |          |          |          |    |          |          |          |                                                              |          |          |          |
|-------------------------------------------------------------|----------|----------|----------|----|----------|----------|----------|--------------------------------------------------------------|----------|----------|----------|
| C                                                           | -3.08815 | 1.75072  | -1.07166 | C  | 1.55827  | -0.94340 | 0.86179  | H                                                            | -1.85276 | -1.11874 | -3.73734 |
| C                                                           | 0.40113  | 3.35465  | -1.14255 | C  | 1.32871  | -2.34647 | 0.78580  | H                                                            | -3.32994 | -2.01848 | -4.04244 |
| H                                                           | 0.87406  | 2.44679  | -0.76769 | H  | 1.03593  | -2.89369 | -0.09900 | H                                                            | -1.82696 | -2.88452 | -3.73264 |
| C                                                           | 1.16834  | 3.76472  | -2.39718 | C  | 1.50959  | -2.88766 | 2.08209  | C                                                            | -3.54045 | -3.25171 | -1.58205 |
| H                                                           | 0.80527  | 4.69964  | -2.82686 | H  | 1.38978  | -3.92539 | 2.35534  | H                                                            | -2.97909 | -4.16418 | -1.79129 |
| H                                                           | 1.11630  | 2.99107  | -3.16433 | C  | 1.87712  | -1.83283 | 2.95263  | H                                                            | -4.46853 | -3.30667 | -2.15336 |
| H                                                           | 2.22168  | 3.91451  | -2.16048 | H  | 2.08799  | -1.92320 | 4.00761  | H                                                            | -3.81211 | -3.25596 | -0.52616 |
| C                                                           | 0.50861  | 4.43564  | -0.06483 | C  | 1.91450  | -0.63334 | 2.20213  | N                                                            | -1.48814 | -0.02993 | -0.14855 |
| H                                                           | 1.55348  | 4.62305  | 0.19090  | H  | 2.16964  | 0.34474  | 2.57944  | O                                                            | 0.46619  | -1.01443 | -2.09934 |
| H                                                           | -0.01168 | 4.14238  | 0.84616  | C  | 2.61705  | 0.85027  | -0.29241 | H                                                            | 1.29852  | -0.75764 | -1.33345 |
| H                                                           | 0.07708  | 5.37799  | -0.40872 | C  | 3.82094  | 0.35256  | -0.82263 | H                                                            | 0.69684  | -0.82624 | -3.01491 |
| C                                                           | -3.89540 | 0.65571  | -0.40995 | C  | 4.92156  | 1.19796  | -0.89063 | <b>TS3 (C<sub>1</sub>): E<sub>tot</sub> = -3208.20655532</b> |          |          |          |
| H                                                           | -3.19611 | -0.00511 | 0.10361  | H  | 5.85565  | 0.82608  | -1.29319 | C                                                            | 1.43046  | -0.35931 | 1.40143  |
| C                                                           | -4.69428 | -0.18663 | -1.40458 | C  | 4.85096  | 2.50557  | -0.44941 | C                                                            | 1.54811  | -1.73649 | 1.73056  |
| H                                                           | -4.04773 | -0.62898 | -2.16096 | H  | 5.71616  | 3.15197  | -0.51571 | H                                                            | 1.63390  | -2.55647 | 1.03254  |
| H                                                           | -5.46322 | 0.39851  | -1.91197 | C  | 3.67003  | 2.97561  | 0.08830  | C                                                            | 1.50580  | -1.84166 | 3.14022  |
| H                                                           | -5.20613 | -0.99970 | -0.88630 | H  | 3.62383  | 3.99697  | 0.44581  | H                                                            | 1.56450  | -2.75945 | 3.70536  |
| C                                                           | -4.83724 | 1.26226  | 0.63423  | C  | 2.54276  | 2.16524  | 0.19229  | C                                                            | 1.37400  | -0.53763 | 3.67622  |
| H                                                           | -5.34106 | 0.47873  | 1.20397  | C  | 4.00105  | -1.08257 | -1.27866 | H                                                            | 1.31001  | -0.28428 | 4.72355  |
| H                                                           | -5.61029 | 1.87072  | 0.16097  | H  | 3.03752  | -1.59038 | -1.28957 | C                                                            | 1.32399  | 0.38559  | 2.60553  |
| H                                                           | -4.30489 | 1.90408  | 1.33545  | C  | 4.55575  | -1.17356 | -2.70004 | H                                                            | 1.19749  | 1.45292  | 2.69614  |
| Fe                                                          | -0.08570 | -0.28062 | 2.46938  | H  | 5.57059  | -0.78105 | -2.77427 | C                                                            | 2.71481  | 0.53159  | -0.46495 |
| N                                                           | -0.96150 | 0.94616  | -0.13407 | H  | 3.93804  | -0.61794 | -3.40668 | C                                                            | 3.37947  | -0.39355 | -1.28791 |
| Si                                                          | -0.07429 | -0.19174 | -1.25751 | H  | 4.58861  | -2.21375 | -3.02734 | C                                                            | 4.66226  | -0.08137 | -1.72303 |
| C                                                           | 0.64882  | -1.59103 | 1.12346  | C  | 4.87675  | -1.85019 | -0.28732 | H                                                            | 5.19543  | -0.78269 | -2.35135 |
| C                                                           | -0.59416 | -2.06349 | 1.63145  | H  | 4.97654  | -2.89380 | -0.59028 | C                                                            | 5.27677  | 1.10127  | -1.36829 |
| H                                                           | -1.48783 | -2.24002 | 1.05040  | H  | 4.44392  | -1.83215 | 0.71287  | H                                                            | 6.27676  | 1.32328  | -1.71602 |
| C                                                           | -0.47203 | -2.21875 | 3.03614  | H  | 5.87950  | -1.42328 | -0.22837 | C                                                            | 4.59903  | 1.99882  | -0.57232 |
| H                                                           | -1.25013 | -2.55219 | 3.70681  | C  | 1.31228  | 2.76254  | 0.84370  | H                                                            | 5.07609  | 2.93235  | -0.30501 |
| C                                                           | 0.85293  | -1.87656 | 3.40062  | H  | 0.53807  | 1.99397  | 0.91111  | C                                                            | 3.31297  | 1.74535  | -0.10403 |
| H                                                           | 1.26261  | -1.89957 | 4.39936  | C  | 0.75638  | 3.92164  | 0.01827  | C                                                            | 2.83267  | -1.73929 | -1.73537 |
| C                                                           | 1.54363  | -1.48719 | 2.22785  | H  | 0.48689  | 3.59649  | -0.98573 | H                                                            | 1.77922  | -1.85515 | -1.45554 |
| H                                                           | 2.57091  | -1.15886 | 2.17052  | H  | 1.48323  | 4.73090  | -0.06888 | C                                                            | 2.86964  | -1.87958 | -3.25744 |
| C                                                           | 2.09703  | -1.83660 | -0.75098 | H  | -0.13636 | 4.33444  | 0.48915  | H                                                            | 3.89107  | -1.88405 | -3.63777 |
| C                                                           | 2.04250  | -3.19635 | -1.10835 | C  | 1.59180  | 3.22078  | 2.27672  | H                                                            | 2.33392  | -1.06681 | -3.74471 |
| C                                                           | 3.18068  | -3.80756 | -1.62072 | H  | 0.67025  | 3.56701  | 2.74792  | H                                                            | 2.41096  | -2.82109 | -3.56169 |
| C                                                           | 3.15154  | -4.85803 | -1.88522 | H  | 2.30181  | 4.04833  | 2.30711  | C                                                            | 3.59914  | -2.88447 | -1.06951 |
| H                                                           | 4.35267  | -3.09726 | -1.80719 | H  | 1.99882  | 2.41977  | 2.89316  | H                                                            | 3.14665  | -3.84662 | -1.31495 |
| H                                                           | 5.22886  | -3.58617 | -2.21317 | Fe | 0.04487  | -1.44431 | 2.07991  | H                                                            | 3.62549  | -2.78301 | 0.01497  |
| C                                                           | 4.39519  | -1.75822 | -1.46904 | N  | 1.48107  | -0.03337 | -0.23229 | H                                                            | 4.63355  | -2.91167 | -1.41417 |
| H                                                           | 5.31586  | -1.20526 | -1.61510 | Si | -0.16419 | 0.59818  | -1.15142 | C                                                            | 2.68973  | 2.81987  | 0.76013  |
| C                                                           | 3.28660  | -1.11205 | -0.93075 | C  | -1.51803 | -0.60787 | 1.13940  | H                                                            | 1.66086  | 2.55592  | 0.99500  |
| C                                                           | 0.78569  | -4.02117 | -0.93285 | C  | -1.28246 | 0.06743  | 2.37315  | C                                                            | 2.61982  | 4.16065  | 0.02954  |
| H                                                           | -0.03143 | -3.34295 | -0.69040 | H  | -1.02567 | 1.11134  | 2.48301  | H                                                            | 2.12511  | 4.07046  | -0.93515 |
| C                                                           | 0.39095  | -4.74896 | -2.21799 | C  | -1.40152 | -0.87182 | 3.42528  | H                                                            | 3.61318  | 4.58350  | -0.13179 |
| H                                                           | 1.11756  | -5.51088 | -2.50398 | H  | -1.26096 | -0.66799 | 4.47643  | H                                                            | 2.03963  | 4.86729  | 0.62061  |
| H                                                           | 0.30030  | -4.05624 | -3.05663 | C  | -1.74142 | -2.12457 | 2.85709  | C                                                            | 3.44842  | 2.96240  | 2.08142  |
| H                                                           | -0.56889 | -5.25315 | -2.09084 | H  | -1.90103 | -3.04470 | 3.39942  | H                                                            | 2.93350  | 3.66983  | 2.73308  |
| C                                                           | 0.93284  | -5.00042 | 0.23157  | C  | -1.81878 | -1.96540 | 1.45439  | H                                                            | 4.45799  | 3.34445  | 1.92060  |
| H                                                           | 0.00957  | -5.56222 | 0.38636  | H  | -2.03701 | -2.74517 | 0.74116  | H                                                            | 3.53913  | 2.01308  | 2.60998  |
| H                                                           | 1.16327  | -4.47614 | 1.15865  | C  | -2.79472 | 0.22057  | -0.69614 | Fe                                                           | -0.20441 | -0.94379 | 2.41242  |
| H                                                           | 1.73230  | -5.72027 | 0.04442  | C  | -3.47251 | 1.41297  | -0.38609 | N                                                            | 1.38706  | 0.16429  | 0.05359  |
| C                                                           | 3.41220  | 0.34640  | -0.55428 | C  | -4.75296 | 1.60924  | -0.89151 | Si                                                           | -0.24655 | 1.32805  | -0.28816 |
| H                                                           | 2.46848  | 0.65180  | -0.10108 | H  | -5.28874 | 2.51871  | -0.64830 | C                                                            | -1.70357 | -0.49886 | 1.13486  |
| C                                                           | 3.63606  | 1.21425  | -1.79022 | C  | -5.35778 | 0.66897  | -1.70305 | C                                                            | -1.89254 | 0.19897  | 2.36389  |
| H                                                           | 2.80918  | 1.09961  | -2.49082 | H  | -6.35477 | 0.84054  | -2.08762 | H                                                            | -1.91084 | 1.27263  | 2.48590  |
| H                                                           | 4.56119  | 0.94968  | -2.30607 | C  | -4.67556 | -0.48739 | -2.02578 | C                                                            | -1.99518 | -0.75743 | 3.40171  |
| H                                                           | 3.70524  | 2.26854  | -1.51515 | H  | -5.14770 | -1.21613 | -2.67364 | H                                                            | -2.12838 | -0.54052 | 4.45129  |
| C                                                           | 4.51391  | 0.57673  | 0.47998  | C  | -3.39765 | -0.73430 | -1.53416 | C                                                            | -1.89795 | -2.04741 | 2.82399  |
| H                                                           | 4.53054  | 1.62182  | 0.79513  | C  | -2.87650 | 2.50016  | 0.48016  | H                                                            | -1.94661 | -2.98570 | 3.35621  |
| H                                                           | 5.50287  | 0.34166  | 0.08282  | H  | -1.83503 | 2.24513  | 0.68018  | C                                                            | -1.71844 | -1.89192 | 1.42943  |
| H                                                           | 4.36598  | -0.03614 | 1.36944  | C  | -2.87362 | 3.84987  | -0.23676 | H                                                            | -1.60603 | -2.68758 | 0.70757  |
| N                                                           | 0.94677  | -1.21153 | -0.19340 | H  | -3.88279 | 4.19836  | -0.46069 | C                                                            | -2.55307 | -0.04268 | -1.05685 |
| N                                                           | -1.49974 | -1.20703 | -1.82313 | H  | -2.32149 | 3.79507  | -1.17484 | C                                                            | -3.63343 | 0.85009  | -0.96647 |
| H                                                           | -1.84320 | 0.06166  | -3.37305 | H  | -2.40340 | 4.61259  | 0.38622  | C                                                            | -4.71158 | 0.68440  | -1.82883 |
| H                                                           | -2.14379 | -1.54067 | -1.11520 | C  | -3.60530 | 2.59329  | 1.82117  | H                                                            | -5.55509 | 1.36118  | -1.76401 |
| H                                                           | -1.18569 | -2.02258 | -2.33970 | H  | -3.12669 | 3.32862  | 2.47138  | C                                                            | -4.72701 | -0.32433 | -2.77290 |
| N                                                           | -1.24736 | 0.77800  | -3.82846 | H  | -3.60990 | 1.63513  | 2.34024  | H                                                            | -5.57490 | -0.43826 | -3.43561 |
| H                                                           | -1.65559 | 1.70488  | -3.72166 | H  | -4.64373 | 2.90205  | 1.68694  | C                                                            | -3.64561 | -1.17849 | -2.87279 |
| H                                                           | -1.05569 | 0.56288  | -4.80014 | C  | -2.71401 | -2.01871 | -1.95083 | H                                                            | -3.65327 | -1.95416 | -3.62904 |
| H                                                           | -0.34340 | 0.66331  | -3.14209 | H  | -1.75976 | -2.08639 | -1.43150 | C                                                            | -2.54968 | -1.05443 | -2.02592 |
| <b>TS2 (C<sub>1</sub>): E<sub>tot</sub> = -3055.6544025</b> |          |          |          | C  | -2.41298 | -2.00830 | -3.45024 | C                                                            | -3.67816 | 1.99733  | 0.02034  |

|                                                              |          |          |          |                                                              |          |          |          |                                                              |          |          |          |
|--------------------------------------------------------------|----------|----------|----------|--------------------------------------------------------------|----------|----------|----------|--------------------------------------------------------------|----------|----------|----------|
| H                                                            | -2.73739 | 2.02817  | 0.56892  | C                                                            | -1.17674 | 0.12477  | 2.37959  | C                                                            | 2.54750  | 7.94029  | 1.95858  |
| C                                                            | -3.79758 | 3.34279  | -0.69467 | H                                                            | -0.88753 | 1.16338  | 2.44813  | H                                                            | 3.57159  | 7.84870  | 2.31882  |
| H                                                            | -4.72408 | 3.42365  | -1.26429 | C                                                            | -1.26608 | -0.78571 | 3.45868  | H                                                            | 2.21087  | 8.96214  | 2.14150  |
| H                                                            | -2.96527 | 3.49295  | -1.38095 | H                                                            | -1.06239 | -0.56231 | 4.49540  | H                                                            | 2.56952  | 7.80171  | 0.87716  |
| H                                                            | -3.78959 | 4.16156  | 0.02747  | C                                                            | -1.67300 | -2.04037 | 2.94095  | C                                                            | 0.18436  | 7.12248  | 2.12645  |
| C                                                            | -4.79571 | 1.80622  | 1.04498  | H                                                            | -1.82870 | -2.94232 | 3.51401  | H                                                            | 0.12143  | 7.06441  | 1.03843  |
| H                                                            | -4.78157 | 2.60841  | 1.78520  | C                                                            | -1.82230 | -1.91260 | 1.54152  | H                                                            | -0.17089 | 8.10995  | 2.42846  |
| H                                                            | -4.68987 | 0.85868  | 1.57342  | H                                                            | -2.10144 | -2.70092 | 0.85994  | H                                                            | -0.49913 | 6.38157  | 2.53820  |
| H                                                            | -5.77945 | 1.81488  | 0.57234  | C                                                            | -2.79397 | 0.23035  | -0.70954 | Fe                                                           | -0.16101 | 2.15816  | 3.51515  |
| C                                                            | -1.37509 | -1.98254 | -2.22640 | C                                                            | -3.44194 | 1.45316  | -0.45636 | N                                                            | 1.66100  | 4.44652  | 4.18449  |
| H                                                            | -0.67622 | -1.82004 | -1.40183 | C                                                            | -4.68902 | 1.68128  | -1.02484 | Si                                                           | 3.14569  | 3.52045  | 4.25943  |
| C                                                            | -0.65624 | -1.63072 | -3.52785 | H                                                            | -5.20617 | 2.61165  | -0.82660 | C                                                            | 1.53110  | 1.19810  | 3.99546  |
| H                                                            | -0.29454 | -0.60249 | -3.50657 | C                                                            | -5.28397 | 0.74287  | -1.84717 | C                                                            | 0.89580  | 0.53402  | 2.90457  |
| H                                                            | -1.32508 | -1.73030 | -4.38432 | H                                                            | -6.25221 | 0.94121  | -2.28815 | H                                                            | 1.30256  | 0.40418  | 1.91494  |
| H                                                            | 0.19095  | -2.29583 | -3.69798 | C                                                            | -4.63462 | -0.44766 | -2.10238 | C                                                            | -0.38224 | 0.10684  | 3.33171  |
| C                                                            | -1.77658 | -3.45633 | -2.19757 | H                                                            | -5.10475 | -1.17770 | -2.74967 | H                                                            | -1.10793 | -0.41598 | 2.72685  |
| H                                                            | -0.89274 | -4.09478 | -2.25040 | C                                                            | -3.39379 | -0.73449 | -1.53927 | C                                                            | -0.55153 | 0.49910  | 4.68183  |
| H                                                            | -2.41435 | -3.72262 | -3.04154 | C                                                            | -2.85207 | 2.51707  | 0.44185  | H                                                            | -1.42612 | 0.32347  | 5.29018  |
| H                                                            | -2.32192 | -3.70909 | -1.28733 | H                                                            | -1.80116 | 2.27263  | 0.60544  | C                                                            | 0.63433  | 1.14896  | 5.10060  |
| N                                                            | -1.46177 | 0.05907  | -0.13616 | C                                                            | -2.89834 | 3.90556  | -0.19451 | H                                                            | 0.81530  | 1.56775  | 6.08028  |
| H                                                            | 1.06587  | -0.60781 | -0.52975 | H                                                            | -3.91967 | 4.25686  | -0.34628 | C                                                            | 3.94406  | 0.97743  | 3.93001  |
| O                                                            | -0.04564 | 1.64394  | -1.86442 | H                                                            | -2.39403 | 3.91952  | -1.16070 | C                                                            | 4.51810  | 0.63441  | 2.69413  |
| H                                                            | -0.38044 | 2.66703  | 0.58510  | H                                                            | -2.40807 | 4.63558  | 0.45188  | C                                                            | 5.64146  | -0.18626 | 2.68804  |
| O                                                            | -0.57261 | 4.13307  | 0.63093  | C                                                            | -3.55752 | 2.52268  | 1.79945  | H                                                            | 6.09734  | -0.45819 | 1.74385  |
| H                                                            | -1.46680 | 4.34378  | 0.91068  | H                                                            | -3.08918 | 3.23862  | 2.47839  | C                                                            | 6.18693  | -0.66653 | 3.86257  |
| H                                                            | -0.12232 | 2.67319  | -1.99200 | H                                                            | -3.52729 | 1.54109  | 2.27126  | H                                                            | 7.05758  | -1.30878 | 3.83558  |
| H                                                            | -0.46025 | 4.23848  | -0.66624 | H                                                            | -4.60615 | 2.80692  | 1.69305  | C                                                            | 5.61551  | -0.32125 | 5.07261  |
| O                                                            | -0.28098 | 4.12708  | -1.77088 | C                                                            | -2.78127 | -2.08658 | -1.84507 | H                                                            | 6.04843  | -0.70337 | 5.98886  |
| H                                                            | -0.97185 | 4.57378  | -2.26123 | H                                                            | -1.83059 | -2.17365 | -1.32117 | C                                                            | 4.49979  | 0.50608  | 5.13216  |
| <b>TS4 (C<sub>1</sub>): E<sub>tot</sub> = -3055.68762144</b> |          |          |          | C                                                            | -2.47277 | -2.24271 | -3.33385 | C                                                            | 3.95979  | 1.08795  | 1.36167  |
| C                                                            | 1.61427  | -1.00867 | 0.81116  | H                                                            | -1.77570 | -1.48067 | -3.67509 | H                                                            | 3.09095  | 1.72057  | 1.55292  |
| C                                                            | 1.31217  | -2.39365 | 0.72574  | H                                                            | -3.37727 | -2.18577 | -3.94243 | C                                                            | 4.96426  | 1.92509  | 0.57047  |
| H                                                            | 0.98365  | -2.91068 | -0.16446 | H                                                            | -2.00868 | -3.21193 | -3.52127 | H                                                            | 5.85173  | 1.34628  | 0.30801  |
| C                                                            | 1.49212  | -2.94606 | 2.01659  | C                                                            | -3.69254 | -3.21835 | -1.36304 | H                                                            | 5.28829  | 2.79911  | 1.13071  |
| H                                                            | 1.32887  | -3.97823 | 2.28798  | H                                                            | -3.19316 | -4.18215 | -1.47712 | H                                                            | 4.51586  | 2.27171  | -0.36236 |
| C                                                            | 1.92346  | -1.91426 | 2.88537  | H                                                            | -4.61909 | -3.26562 | -1.93766 | C                                                            | 3.50898  | -0.11287 | 0.52462  |
| C                                                            | 2.14833  | -2.01980 | 3.93595  | H                                                            | -3.97055 | -3.10149 | -0.31487 | H                                                            | 2.97912  | 0.21929  | -0.37002 |
| C                                                            | 2.00530  | -0.71249 | 2.14088  | N                                                            | -1.50861 | -0.02406 | -0.12045 | H                                                            | 2.85347  | -0.78247 | 1.08139  |
| H                                                            | 2.31981  | 0.25032  | 2.51273  | O                                                            | 0.38538  | -0.99668 | -2.13824 | H                                                            | 4.36297  | -0.70567 | 0.19259  |
| C                                                            | 2.66157  | 0.83238  | -0.32318 | H                                                            | 1.45077  | -0.74219 | -1.27218 | C                                                            | 3.91818  | 0.83658  | 6.48987  |
| C                                                            | 3.89010  | 0.35875  | -0.81258 | H                                                            | -0.20885 | 1.53657  | -1.72349 | H                                                            | 3.17546  | 1.62648  | 6.36637  |
| C                                                            | 4.97485  | 1.22611  | -0.81174 | <b>TS5 (C<sub>1</sub>): E<sub>tot</sub> = -3062.40989527</b> |          |          |          | C                                                            | 4.97555  | 1.37692  | 7.45084  |
| C                                                            | 5.93223  | 0.88129  | -1.18129 | C                                                            | 0.46163  | 4.06862  | 3.55398  | H                                                            | 5.47966  | 2.24743  | 7.03052  |
| C                                                            | 4.85871  | 2.52164  | -0.34316 | C                                                            | 0.30498  | 3.64852  | 2.20651  | H                                                            | 5.73663  | 0.63309  | 6.79021  |
| H                                                            | 5.71579  | 3.18197  | -0.35004 | H                                                            | 1.09279  | 3.60272  | 1.46717  | H                                                            | 4.51453  | 1.67923  | 8.39219  |
| C                                                            | 3.64307  | 2.96688  | 0.13465  | C                                                            | -1.04734 | 3.26585  | 2.02298  | C                                                            | 3.20306  | -0.37911 | 7.08036  |
| H                                                            | 3.55987  | 3.98295  | 0.49995  | H                                                            | -1.47936 | 2.88760  | 1.10851  | H                                                            | 2.73641  | -0.12784 | 8.03496  |
| C                                                            | 2.52421  | 2.13808  | 0.16032  | C                                                            | -1.73550 | 3.47897  | 3.24296  | H                                                            | 3.90072  | -1.19923 | 7.25986  |
| C                                                            | 4.10519  | -1.06124 | -1.30004 | H                                                            | -2.78334 | 3.29022  | 3.42176  | H                                                            | 2.42499  | -0.74550 | 6.41094  |
| H                                                            | 3.14754  | -1.57407 | -1.38903 | C                                                            | -0.80744 | 3.97157  | 4.19151  | N                                                            | 2.79418  | 1.83373  | 3.97297  |
| C                                                            | 4.73200  | -1.10054 | -2.69299 | H                                                            | -1.01634 | 4.22800  | 5.21957  | B                                                            | 5.02157  | 5.00155  | 2.79959  |
| H                                                            | 5.74324  | -0.69165 | -2.70571 | C                                                            | 1.66361  | 5.70751  | 4.85633  | N                                                            | 5.15286  | 5.48986  | 4.24089  |
| H                                                            | 4.13298  | -0.54129 | -3.41108 | C                                                            | 1.65673  | 5.74844  | 6.26087  | H                                                            | 4.05200  | 4.01541  | 2.86923  |
| H                                                            | 4.79605  | -2.13108 | -3.04396 | C                                                            | 1.71796  | 6.98617  | 6.89514  | H                                                            | 5.96784  | 4.36703  | 2.42381  |
| C                                                            | 4.93715  | -1.85056 | -0.28794 | H                                                            | 1.72488  | 7.03143  | 7.97764  | H                                                            | 4.52097  | 5.76399  | 2.02297  |
| H                                                            | 5.05984  | -2.88328 | -0.61760 | C                                                            | 1.75395  | 8.16077  | 6.17051  | H                                                            | 4.39825  | 4.55584  | 4.86335  |
| H                                                            | 4.45933  | -1.86737 | 0.69187  | H                                                            | 1.79469  | 9.11473  | 6.67999  | H                                                            | 6.08517  | 5.44400  | 4.62662  |
| H                                                            | 5.93278  | -1.41929 | -0.16903 | C                                                            | 1.72661  | 8.11119  | 4.78785  | H                                                            | 4.74104  | 6.39163  | 4.44530  |
| C                                                            | 1.23366  | 2.71259  | 0.70388  | H                                                            | 1.74163  | 9.03740  | 4.22803  | <b>TS6 (C<sub>1</sub>): E<sub>tot</sub> = -3061.25792805</b> |          |          |          |
| C                                                            | 0.45558  | 1.94864  | 0.66240  | C                                                            | 1.68819  | 6.89947  | 4.10727  | C                                                            | -0.64767 | 4.00137  | 4.58065  |
| C                                                            | 0.76802  | 3.89623  | -0.14306 | C                                                            | 1.55429  | 4.50943  | 7.12514  | C                                                            | -1.78456 | 4.24639  | 3.75946  |
| H                                                            | 0.63434  | 3.61305  | -1.18635 | H                                                            | 1.46364  | 3.64222  | 6.46918  | H                                                            | -1.83950 | 4.96358  | 2.95386  |
| H                                                            | 1.48555  | 4.71731  | -0.11122 | C                                                            | 2.79866  | 4.31281  | 7.98905  | C                                                            | -2.82189 | 3.38360  | 4.18447  |
| H                                                            | -0.18313 | 4.28042  | 0.22422  | H                                                            | 3.69698  | 4.23796  | 7.37663  | H                                                            | -3.81054 | 3.32402  | 3.75485  |
| C                                                            | 1.36051  | 3.12587  | 2.17064  | H                                                            | 2.71775  | 3.39674  | 8.57709  | C                                                            | -2.33522 | 2.60482  | 5.26324  |
| H                                                            | 0.40425  | 3.50014  | 2.54144  | H                                                            | 2.93609  | 5.13869  | 8.68914  | H                                                            | -2.88824 | 1.84931  | 5.0108   |
| H                                                            | 2.09467  | 3.92100  | 2.30699  | C                                                            | 0.29515  | 4.53977  | 7.99311  | C                                                            | -0.99890 | 2.99934  | 5.52395  |
| H                                                            | 1.65669  | 2.29139  | 2.80565  | H                                                            | 0.32817  | 5.34419  | 8.72944  | H                                                            | -0.34489 | 2.59240  | 6.28269  |
| Fe                                                           | 0.09233  | -1.43618 | 2.05754  | H                                                            | 0.18567  | 3.60183  | 8.54030  | C                                                            | 0.63233  | 6.04120  | 4.57378  |
| N                                                            | 1.55756  | -0.09597 | -0.29226 | H                                                            | -0.60401 | 4.68411  | 7.39391  | C                                                            | 0.61491  | 6.60521  | 5.85721  |
| Si                                                           | -0.14813 | 0.15785  | -1.18881 | C                                                            | 1.62553  | 6.90146  | 2.59501  | C                                                            | 0.61614  | 7.99013  | 5.96968  |
| C                                                            | -1.50420 | -0.57134 | 1.18018  | H                                                            | 1.95860  | 5.92440  | 2.24144  | H                                                            | 0.59550  | 8.44685  | 6.95135  |

|    |          |          |          |                                                              |          |          |          |                                                              |          |          |          |
|----|----------|----------|----------|--------------------------------------------------------------|----------|----------|----------|--------------------------------------------------------------|----------|----------|----------|
| C  | 0.65935  | 8.79891  | 4.84847  | H                                                            | 2.96841  | 3.60811  | 5.94698  | H                                                            | 3.93405  | 0.94083  | 5.52377  |
| H  | 0.67066  | 9.87569  | 4.95611  | <b>TS7 (C<sub>1</sub>): E<sub>tot</sub> = -3144.33378985</b> |          |          |          | C                                                            | 5.81498  | 0.23304  | 6.21377  |
| C  | 0.69313  | 8.22827  | 3.59023  | C                                                            | 0.63507  | 3.99864  | 3.27035  | H                                                            | 6.37274  | 1.16717  | 6.12446  |
| H  | 0.73512  | 8.87076  | 2.71932  | C                                                            | 0.31719  | 3.63918  | 1.92990  | H                                                            | 6.52335  | -0.58461 | 6.07305  |
| C  | 0.66914  | 6.84695  | 3.42672  | H                                                            | 0.98718  | 3.71599  | 1.08611  | H                                                            | 5.44889  | 0.16136  | 7.23886  |
| C  | 0.57623  | 5.75593  | 7.10836  | C                                                            | -1.00442 | 3.13415  | 1.90321  | C                                                            | 3.93366  | -1.18021 | 5.33353  |
| H  | 0.79604  | 4.72579  | 6.82555  | H                                                            | -1.52660 | 2.76878  | 1.03142  | H                                                            | 3.58126  | -1.35451 | 6.35176  |
| C  | 1.64624  | 6.16411  | 8.11912  | C                                                            | -1.52423 | 3.19773  | 3.22011  | H                                                            | 4.60531  | -1.99899 | 5.06774  |
| H  | 1.64292  | 5.47601  | 8.96583  | H                                                            | -2.51145 | 2.88660  | 3.52823  | H                                                            | 3.07113  | -1.22506 | 4.67002  |
| H  | 1.48006  | 7.16580  | 8.51874  | C                                                            | -0.52201 | 3.72832  | 4.06299  | N                                                            | 3.16152  | 1.92019  | 3.45162  |
| H  | 2.63861  | 6.13692  | 7.67016  | H                                                            | -0.61431 | 3.88274  | 5.12686  | B                                                            | 4.86424  | 4.48646  | 4.61861  |
| C  | -0.81882 | 5.78601  | 7.73410  | C                                                            | 1.94196  | 5.90683  | 3.94911  | H                                                            | 2.75757  | 3.02705  | 5.73764  |
| H  | -1.08154 | 6.79374  | 8.06195  | C                                                            | 1.62003  | 6.43941  | 5.20946  | H                                                            | 4.93854  | 5.62989  | 4.29647  |
| H  | -0.86459 | 5.13217  | 8.60694  | C                                                            | 1.66478  | 7.81857  | 5.38921  | N                                                            | 5.70827  | 4.01811  | 5.67211  |
| H  | -1.58089 | 5.45573  | 7.02823  | H                                                            | 1.42154  | 8.23904  | 6.35775  | H                                                            | 6.34066  | 4.65295  | 6.13134  |
| C  | 0.71073  | 6.27350  | 2.02572  | C                                                            | 2.00943  | 8.66548  | 4.35454  | H                                                            | 5.43471  | 3.25042  | 6.26267  |
| H  | 0.49332  | 5.20492  | 2.08760  | H                                                            | 2.02776  | 9.73662  | 4.50860  | B                                                            | 6.96993  | 4.15653  | 2.73516  |
| C  | 2.10437  | 6.43074  | 1.41585  | C                                                            | 2.34371  | 8.13237  | 3.12425  | N                                                            | 7.52791  | 2.91005  | 3.58719  |
| H  | 2.87011  | 5.97217  | 2.04352  | H                                                            | 2.62918  | 8.79949  | 2.32008  | H                                                            | 7.20074  | 3.96624  | 1.56778  |
| H  | 2.36640  | 7.48374  | 1.29868  | C                                                            | 2.33347  | 6.75990  | 2.90388  | H                                                            | 7.45949  | 5.16472  | 3.18331  |
| H  | 2.15253  | 5.96470  | 0.42934  | C                                                            | 1.24845  | 5.58316  | 6.40215  | H                                                            | 5.74597  | 4.13029  | 2.93319  |
| C  | -0.35252 | 6.88545  | 1.11426  | H                                                            | 1.18637  | 4.54485  | 6.07913  | H                                                            | 7.12517  | 3.00083  | 4.52475  |
| H  | -0.16619 | 7.94189  | 0.91692  | C                                                            | 2.33165  | 5.64523  | 7.47966  | H                                                            | 7.22770  | 2.02113  | 3.19510  |
| H  | -1.35004 | 6.80582  | 1.54787  | H                                                            | 3.30009  | 5.33247  | 7.08759  | H                                                            | 8.53832  | 2.90570  | 3.65358  |
| H  | -0.36399 | 6.37565  | 0.14962  | H                                                            | 2.08157  | 4.98937  | 8.31586  | <b>TS8 (C<sub>1</sub>): E<sub>tot</sub> = -3144.33218205</b> |          |          |          |
| Fe | -1.13979 | 2.31407  | 3.61279  | H                                                            | 2.44814  | 6.65597  | 7.87464  | C                                                            | 0.66770  | 3.99990  | 3.23126  |
| N  | 0.61475  | 4.61443  | 4.43712  | C                                                            | -0.11432 | 5.96746  | 6.97886  | C                                                            | 0.34545  | 3.61873  | 1.89774  |
| Si | 2.12681  | 3.84687  | 4.09697  | H                                                            | -0.10547 | 6.96705  | 7.41612  | H                                                            | 1.01666  | 3.66798  | 1.05282  |
| C  | 0.66648  | 1.66763  | 3.04052  | H                                                            | -0.40560 | 5.27248  | 7.76876  | C                                                            | -0.98325 | 3.13164  | 1.87951  |
| C  | -0.03569 | 2.15261  | 1.90079  | H                                                            | -0.88992 | 5.95475  | 6.21268  | H                                                            | -1.50948 | 2.75578  | 1.01464  |
| H  | 0.27120  | 2.97882  | 1.27479  | C                                                            | 2.75879  | 6.24446  | 1.54802  | C                                                            | -1.50424 | 3.23209  | 3.19363  |
| C  | -1.22380 | 1.39801  | 1.76053  | H                                                            | 2.82530  | 5.15712  | 1.61008  | H                                                            | -2.49643 | 2.94244  | 3.50664  |
| H  | -1.97686 | 1.53769  | 0.99952  | C                                                            | 4.14456  | 6.76251  | 1.16277  | C                                                            | -0.49516 | 3.76513  | 4.02666  |
| C  | -1.24410 | 0.41814  | 2.78299  | H                                                            | 4.89709  | 6.46604  | 1.89420  | H                                                            | -0.58620 | 3.94503  | 5.08674  |
| H  | -2.01784 | -0.31824 | 2.94043  | H                                                            | 4.16727  | 7.85027  | 1.08058  | C                                                            | 1.95544  | 5.90959  | 3.90710  |
| C  | -0.08239 | 0.57870  | 3.57308  | H                                                            | 4.44694  | 6.36170  | 0.19454  | C                                                            | 1.64898  | 6.43573  | 5.17389  |
| H  | 0.17424  | -0.00507 | 4.44247  | C                                                            | 1.72557  | 6.59579  | 0.47724  | C                                                            | 1.66343  | 7.81555  | 5.35252  |
| C  | 3.04678  | 1.42512  | 3.41534  | H                                                            | 2.00230  | 6.15759  | -0.48425 | H                                                            | 1.43263  | 8.23044  | 6.32647  |
| C  | 3.82724  | 1.57350  | 2.25850  | H                                                            | 1.65243  | 7.67582  | 0.33509  | C                                                            | 1.96218  | 8.67093  | 4.31027  |
| C  | 4.97176  | 0.79557  | 2.12259  | H                                                            | 0.73320  | 6.23094  | 0.74274  | H                                                            | 1.95628  | 9.74227  | 4.46396  |
| H  | 5.58310  | 0.89615  | 1.23411  | Fe                                                           | 0.17800  | 2.02745  | 3.17635  | C                                                            | 2.28097  | 8.14543  | 3.07280  |
| C  | 5.35408  | -0.09392 | 3.10856  | N                                                            | 1.88055  | 4.49591  | 3.71875  | H                                                            | 2.52970  | 8.81864  | 2.26136  |
| H  | 6.24861  | -0.69060 | 2.98622  | Si                                                           | 3.14673  | 3.44708  | 4.34273  | C                                                            | 2.29971  | 6.77273  | 2.85381  |
| C  | 4.59602  | -0.20625 | 4.25911  | C                                                            | 1.97328  | 1.15599  | 3.48765  | C                                                            | 1.33793  | 5.56962  | 6.37637  |
| H  | 4.91291  | -0.89061 | 5.03672  | C                                                            | 1.33386  | 0.55884  | 2.36404  | H                                                            | 1.26651  | 4.53316  | 6.04896  |
| C  | 3.43845  | 0.54493  | 4.43784  | H                                                            | 1.70736  | 0.54711  | 1.35322  | C                                                            | 2.47604  | 5.63499  | 7.39556  |
| C  | 3.51240  | 2.58052  | 1.17456  | C                                                            | 0.11121  | -0.00684 | 2.79729  | H                                                            | 3.42517  | 5.34773  | 6.94175  |
| H  | 2.61169  | 3.12852  | 1.45518  | H                                                            | -0.60073 | -0.52512 | 2.17254  | H                                                            | 2.28564  | 4.96213  | 8.23396  |
| C  | 4.63904  | 3.60830  | 1.06030  | C                                                            | -0.01940 | 0.23873  | 4.18438  | H                                                            | 2.59611  | 6.64262  | 7.79751  |
| H  | 5.56169  | 3.15546  | 0.69304  | H                                                            | -0.84755 | -0.06161 | 4.80899  | C                                                            | 0.00483  | 5.93869  | 7.02715  |
| H  | 4.85357  | 4.05882  | 2.03099  | C                                                            | 1.13513  | 0.93402  | 4.61934  | H                                                            | 0.02896  | 6.93260  | 7.47653  |
| H  | 4.36550  | 4.40235  | 0.36363  | H                                                            | 1.32716  | 1.27068  | 5.62691  | H                                                            | -0.24079 | 5.23196  | 7.82201  |
| C  | 3.21679  | 1.90138  | -0.16108 | C                                                            | 4.31781  | 1.26476  | 2.94575  | H                                                            | -0.80971 | 5.92997  | 6.30246  |
| H  | 4.07925  | 1.34566  | -0.53290 | C                                                            | 4.68608  | 1.41223  | 1.59746  | C                                                            | 2.70854  | 6.26617  | 1.48996  |
| H  | 2.95595  | 2.64329  | -0.91787 | C                                                            | 5.83262  | 0.76652  | 1.14187  | H                                                            | 2.78876  | 5.17983  | 1.54944  |
| H  | 2.38400  | 1.20336  | -0.07167 | H                                                            | 6.13945  | 0.89135  | 0.11079  | C                                                            | 4.08221  | 6.80352  | 1.08797  |
| C  | 2.67715  | 0.38764  | 5.73718  | C                                                            | 6.57729  | -0.05022 | 1.97320  | H                                                            | 4.84321  | 6.53498  | 1.82189  |
| H  | 1.80607  | 1.04516  | 5.70442  | H                                                            | 7.45343  | -0.56041 | 1.59352  | H                                                            | 4.08397  | 7.89033  | 0.99100  |
| C  | 3.52682  | 0.81260  | 6.93699  | C                                                            | 6.18334  | -0.22611 | 3.29051  | H                                                            | 4.38763  | 6.39464  | 0.12382  |
| H  | 3.89941  | 1.82989  | 6.82658  | H                                                            | 6.75482  | -0.88936 | 3.92860  | C                                                            | 1.65657  | 6.60470  | 0.43399  |
| H  | 4.38570  | 0.15248  | 7.07122  | C                                                            | 5.06501  | 0.42904  | 3.79794  | H                                                            | 1.92742  | 6.17457  | -0.53282 |
| H  | 2.93759  | 0.76911  | 7.85459  | C                                                            | 3.85653  | 2.19713  | 0.60447  | H                                                            | 1.56301  | 7.68377  | 0.29676  |
| C  | 2.18660  | -1.04978 | 5.92677  | H                                                            | 2.96537  | 2.54905  | 1.12644  | H                                                            | 0.67482  | 6.22108  | 0.71175  |
| H  | 1.53492  | -1.12139 | 6.79926  | C                                                            | 4.59056  | 3.42030  | 0.06467  | Fe                                                           | 0.18168  | 2.03620  | 3.17859  |
| H  | 3.01941  | -1.73595 | 6.08908  | H                                                            | 5.48428  | 3.13813  | -0.49500 | N                                                            | 1.91503  | 4.49853  | 3.67413  |
| H  | 1.63673  | -1.41587 | 5.05980  | H                                                            | 4.90821  | 4.08342  | 0.86360  | Si                                                           | 3.21604  | 3.46256  | 4.26250  |
| N  | 1.85744  | 2.21284  | 3.57155  | H                                                            | 3.94067  | 3.97953  | -0.61198 | C                                                            | 1.96849  | 1.15213  | 3.50215  |
| N  | 5.06372  | 3.73919  | 4.91659  | C                                                            | 3.41184  | 1.31082  | -0.56309 | C                                                            | 1.31356  | 0.52560  | 2.40421  |
| H  | 5.24057  | 2.75756  | 4.80365  | H                                                            | 2.68098  | 1.83643  | -1.17973 | H                                                            | 1.68253  | 0.47488  | 1.39197  |
| H  | 5.88394  | 4.26711  | 5.14386  | H                                                            | 2.96293  | 0.37363  | -0.23364 | C                                                            | 0.08700  | -0.00901 | 2.86661  |
| B  | 3.75396  | 4.28877  | 5.20441  | H                                                            | 4.25159  | 1.05193  | -1.21031 | H                                                            | -0.63655 | -0.54016 | 2.26647  |
| H  | 3.67506  | 5.44107  | 5.53285  | C                                                            | 4.64746  | 0.16928  | 5.22959  | C                                                            | -0.02929 | 0.28617  | 4.24572  |



|                                                                |          |          |          |                                                                |          |          |          |          |          |          |          |
|----------------------------------------------------------------|----------|----------|----------|----------------------------------------------------------------|----------|----------|----------|----------|----------|----------|----------|
| H                                                              | -0.85613 | 0.01723  | 4.88620  | H                                                              | 3.40975  | 2.59260  | 1.88858  | C        | 4.10639  | -0.53879 | -2.57481 |
| C                                                              | 1.13762  | 0.98237  | 4.64695  | H                                                              | 4.29880  | 3.07290  | 2.34127  | H        | 4.25192  | -0.56944 | -3.64778 |
| H                                                              | 1.34531  | 1.35415  | 5.63947  | <b>TSS2 (C<sub>1</sub>):</b> E <sub>tot</sub> = -2048.68023293 |          |          | C        | 2.86586  | -0.17420 | -2.05944 |          |
| C                                                              | 4.31306  | 1.24538  | 2.92398  | C                                                              | 0.68020  | 3.72966  | 2.44194  | C        | 3.61327  | -0.46945 | 1.69504  |
| C                                                              | 4.68392  | 1.40915  | 1.57981  | C                                                              | 0.10740  | 3.25248  | 1.22833  | H        | 2.54950  | -0.43240 | 1.93028  |
| C                                                              | 5.84641  | 0.79374  | 1.12437  | H                                                              | 0.61523  | 3.19220  | 0.27629  | C        | 4.15856  | -1.73956 | 2.34611  |
| H                                                              | 6.15538  | 0.93240  | 0.09542  | C                                                              | -1.22014 | 2.84900  | 1.50026  | H        | 5.24331  | -1.81999 | 2.25886  |
| C                                                              | 6.60818  | -0.00472 | 1.95598  | H                                                              | -1.91355 | 2.42889  | 0.78709  | H        | 3.71533  | -2.62586 | 1.89302  |
| H                                                              | 7.50218  | -0.48596 | 1.58040  | C                                                              | -1.48331 | 3.09349  | 2.87206  | H        | 3.92406  | -1.74226 | 3.41263  |
| C                                                              | 6.20905  | -0.20295 | 3.26801  | H                                                              | -2.41233 | 2.89202  | 3.38416  | C        | 4.27975  | 0.77505  | 2.28369  |
| H                                                              | 6.79445  | -0.85537 | 3.90455  | C                                                              | -0.31582 | 3.64315  | 3.45481  | H        | 4.12777  | 0.82189  | 3.36383  |
| C                                                              | 5.07112  | 0.41733  | 3.77354  | H                                                              | -0.18550 | 3.92333  | 4.49024  | H        | 3.87547  | 1.68925  | 1.85015  |
| C                                                              | 3.84196  | 2.19283  | 0.59689  | Fe                                                             | 0.12090  | 1.81243  | 2.68146  | H        | 5.35623  | 0.76574  | 2.10074  |
| H                                                              | 2.94126  | 2.51581  | 1.12051  | N                                                              | 2.00992  | 4.18161  | 2.59788  | C        | 1.75765  | 0.18214  | -3.02837 |
| C                                                              | 4.55340  | 3.44196  | 0.08739  | Si                                                             | 3.51413  | 3.31784  | 3.44468  | H        | 0.92079  | 0.58821  | -2.45652 |
| H                                                              | 5.46435  | 3.19213  | -0.45974 | C                                                              | 1.77472  | 1.01241  | 3.50473  | C        | 1.25782  | -1.05847 | -3.76805 |
| H                                                              | 4.83556  | 4.10435  | 0.90177  | C                                                              | 1.60409  | 0.49749  | 2.19035  | H        | 0.90806  | -1.82191 | -3.07185 |
| H                                                              | 3.90309  | 3.99879  | -0.59067 | H                                                              | 2.30211  | 0.62028  | 1.37481  | H        | 2.04886  | -1.50367 | -4.37414 |
| C                                                              | 3.41518  | 1.31942  | -0.58551 | C                                                              | 0.35115  | -0.16093 | 2.13713  | H        | 0.43132  | -0.80609 | -4.43548 |
| H                                                              | 2.69198  | 1.84951  | -1.20753 | H                                                              | -0.07335 | -0.64502 | 1.27012  | C        | 2.18350  | 1.26679  | -4.01813 |
| H                                                              | 2.95988  | 0.38200  | -0.26530 | C                                                              | -0.24484 | -0.08091 | 3.42023  | H        | 1.33481  | 1.57607  | -4.63039 |
| H                                                              | 4.26286  | 1.06288  | -1.22322 | H                                                              | -1.20296 | -0.49196 | 3.70131  | H        | 2.96168  | 0.91867  | -4.69877 |
| C                                                              | 4.64303  | 0.13537  | 5.19789  | C                                                              | 0.63061  | 0.64156  | 4.26671  | H        | 2.56860  | 2.15045  | -3.50825 |
| H                                                              | 3.95176  | 0.92184  | 5.50768  | H                                                              | 0.45905  | 0.89335  | 5.30344  | Fe       | -0.31632 | 2.60398  | 0.39557  |
| C                                                              | 5.80617  | 0.13361  | 6.18966  | N                                                              | 2.84295  | 1.79860  | 3.96499  | N        | 1.42616  | 0.20731  | -0.11250 |
| H                                                              | 6.41367  | 1.03679  | 6.11408  | H                                                              | 2.06522  | 5.18862  | 2.68168  | Si       | 0.18299  | -1.02879 | -0.16838 |
| H                                                              | 6.47206  | -0.71855 | 6.04538  | H                                                              | 3.38771  | 1.34336  | 4.68313  | C        | -1.65542 | 1.16782  | 0.02342  |
| H                                                              | 5.42879  | 0.06794  | 7.21114  | H                                                              | 2.88073  | 3.55102  | 1.73971  | C        | -1.52682 | 1.99979  | -1.12605 |
| C                                                              | 3.88808  | -1.19454 | 5.26585  | H                                                              | 3.67445  | 2.94700  | 1.66864  | H        | -1.18706 | 1.68083  | -2.10103 |
| H                                                              | 3.52755  | -1.38446 | 6.27851  | <b>TSS3 (C<sub>1</sub>):</b> E <sub>tot</sub> = -2048.67350879 |          |          | C        | -1.87069 | 3.32263  | -0.75707 |          |
| H                                                              | 4.53854  | -2.02402 | 4.98108  | C                                                              | 1.82448  | 3.84351  | 1.32398  | H        | -1.85508 | 4.18557  | -1.40589 |
| H                                                              | 3.02684  | -1.19945 | 4.59949  | C                                                              | 1.63024  | 3.23488  | 0.05839  | C        | -2.24868 | 3.31240  | 0.60782  |
| N                                                              | 3.15871  | 1.90332  | 3.43256  | H                                                              | 2.39143  | 3.08838  | -0.69423 | H        | -2.56764 | 4.16774  | 1.18450  |
| B                                                              | 5.01243  | 4.38706  | 4.34481  | C                                                              | 0.26919  | 2.83803  | -0.03837 | C        | -2.12106 | 1.98964  | 1.09131  |
| H                                                              | 2.90660  | 3.10511  | 5.70015  | H                                                              | -0.18681 | 2.35423  | -0.88918 | H        | -2.30935 | 1.66906  | 2.10328  |
| H                                                              | 4.92695  | 5.58242  | 4.32971  | C                                                              | -0.38239 | 3.20610  | 1.16094  | C        | -2.50212 | -1.07241 | 0.10709  |
| N                                                              | 5.84418  | 3.83779  | 5.53948  | H                                                              | -1.42533 | 3.05287  | 1.39427  | C        | -3.07412 | -1.49097 | -1.10577 |
| H                                                              | 6.22228  | 4.57553  | 6.12068  | C                                                              | 0.57885  | 3.81529  | 2.00932  | C        | -4.20912 | -2.29383 | -1.06775 |
| H                                                              | 5.34016  | 3.19820  | 6.14180  | H                                                              | 0.39885  | 4.19179  | 3.00680  | H        | -4.66569 | -2.61644 | -1.99555 |
| B                                                              | 6.99201  | 4.06597  | 2.95969  | Fe                                                             | 1.17106  | 1.91388  | 1.55554  | C        | -4.76608 | -2.69309 | 0.13142  |
| N                                                              | 7.55108  | 2.99755  | 3.90171  | N                                                              | 3.03875  | 4.28090  | 1.85558  | H        | -5.64992 | -3.31755 | 0.14101  |
| H                                                              | 6.86682  | 3.76164  | 1.81109  | Si                                                             | 4.54026  | 3.39292  | 1.73183  | C        | -4.18105 | -2.29623 | 1.31811  |
| H                                                              | 7.40895  | 5.16576  | 3.19250  | C                                                              | 2.82872  | 1.00098  | 2.29427  | H        | -4.61441 | -2.62311 | 2.25570  |
| H                                                              | 5.63147  | 4.07061  | 3.22963  | C                                                              | 2.29316  | 0.24685  | 1.20934  | C        | -3.04950 | -1.48779 | 1.33220  |
| H                                                              | 6.78435  | 3.26960  | 4.92668  | H                                                              | 2.80425  | 0.01870  | 0.28497  | C        | -2.51733 | -1.11285 | -2.46157 |
| H                                                              | 7.42622  | 2.05140  | 3.55899  | C                                                              | 0.97772  | -0.14130 | 1.55904  | H        | -1.57921 | -0.57450 | -2.31799 |
| H                                                              | 8.52513  | 3.14161  | 4.12988  | H                                                              | 0.30754  | -0.72612 | 0.94681  | C        | -2.18636 | -2.35060 | -3.29461 |
| <b>TSS1 (C<sub>1</sub>):</b> E <sub>tot</sub> = -2048.67712442 |          |          |          | C                                                              | 0.69059  | 0.38055  | 2.84523  | H        | -3.07631 | -2.93441 | -3.53401 |
| C                                                              | 0.69019  | 3.71749  | 2.82358  | H                                                              | -0.23427 | 0.25830  | 3.38855  | H        | -1.49088 | -3.00337 | -2.76663 |
| C                                                              | 0.35123  | 3.19370  | 1.54850  | C                                                              | 1.83815  | 1.07470  | 3.30504  | H        | -1.72449 | -2.06160 | -4.23984 |
| H                                                              | 1.02752  | 3.10196  | 0.71094  | H                                                              | 1.94207  | 1.59021  | 4.24877  | C        | -3.47027 | -0.17807 | -3.20650 |
| C                                                              | -1.00571 | 2.78964  | 1.58455  | N                                                              | 4.10331  | 1.61945  | 2.32000  | H        | -3.03691 | 0.13559  | -4.15826 |
| H                                                              | -1.55665 | 2.34882  | 0.76698  | H                                                              | 4.76599  | 2.55222  | 3.09914  | H        | -3.68601 | 0.71629  | -2.62196 |
| C                                                              | -1.51710 | 3.07515  | 2.87510  | H                                                              | 4.84051  | 3.27120  | 0.27119  | H        | -4.42034 | -0.66889 | -3.42512 |
| H                                                              | -2.52550 | 2.89075  | 3.21438  | H                                                              | 4.86291  | 0.96484  | 2.17276  | C        | -2.46983 | -1.10304 | 2.67692  |
| C                                                              | -0.46997 | 3.64078  | 3.64457  | H                                                              | 2.92114  | 4.82619  | 2.69448  | H        | -1.59432 | -0.47382 | 2.50590  |
| H                                                              | -0.53254 | 3.95371  | 4.67729  | <b>TSS4 (C<sub>1</sub>):</b> E <sub>tot</sub> = -3062.41379694 |          |          | C        | -1.99941 | -2.33397 | 3.45337  |          |
| Fe                                                             | 0.08002  | 1.78069  | 3.00916  | C                                                              | 1.36463  | 1.51929  | 0.39800  | H        | -1.28542 | -2.91103 | 2.86963  |
| N                                                              | 1.96169  | 4.16673  | 3.22012  | C                                                              | 1.03806  | 1.89265  | 1.73069  | H        | -2.83517 | -2.98703 | 3.71163  |
| Si                                                             | 3.32120  | 3.12451  | 3.49721  | H                                                              | 0.81263  | 1.20775  | 2.53638  | H        | -1.51808 | -2.03378 | 4.38652  |
| C                                                              | 1.71835  | 0.87633  | 3.81938  | C                                                              | 1.01769  | 3.30773  | 1.79657  | C        | -3.47850 | -0.31176 | 3.51357  |
| C                                                              | 1.40637  | 0.28009  | 2.56951  | H                                                              | 0.78670  | 3.89812  | 2.67072  | H        | -3.00990 | 0.06989  | 4.42267  |
| H                                                              | 2.05827  | 0.25781  | 1.70821  | C                                                              | 1.36321  | 3.81272  | 0.51826  | H        | -4.31732 | -0.93830 | 3.82149  |
| C                                                              | 0.09242  | -0.24288 | 2.64633  | H                                                              | 1.44018  | 4.85514  | 0.24787  | H        | -3.89599 | 0.53229  | 2.96505  |
| H                                                              | -0.43219 | -0.75509 | 1.85345  | C                                                              | 1.58132  | 2.71381  | -0.34589 | N        | -1.34974 | -0.21302 | 0.09007  |
| C                                                              | -0.40892 | 0.01273  | 3.94707  | H                                                              | 1.85414  | 2.76605  | -1.38946 | B        | 0.73961  | -2.96676 | 1.05112  |
| H                                                              | -1.38179 | -0.27045 | 4.32031  | C                                                              | 2.69548  | -0.15920 | -0.66656 | N        | 1.32016  | -4.33546 | 2.75845  |
| C                                                              | 0.58987  | 0.71064  | 4.67085  | C                                                              | 3.75817  | -0.48947 | 0.18980  | H        | 2.15688  | -3.99650 | 3.21047  |
| H                                                              | 0.51157  | 1.06513  | 5.68896  | C                                                              | 4.98491  | -0.82227 | -0.37038 | H        | 1.51246  | -5.24660 | 2.36894  |
| N                                                              | 2.90310  | 1.56481  | 4.13261  | H                                                              | 5.81815  | -1.07132 | 0.27503  | H        | 0.59421  | -4.43097 | 3.45370  |
| H                                                              | 3.30669  | 1.30250  | 5.01620  | C                                                              | 5.16172  | -0.85470 | -1.74205 | H        | -0.23665 | -3.61470 | 0.82000  |
| H                                                              | 1.95079  | 5.04971  | 3.70247  | H                                                              | 6.12198  | -1.12706 | -2.16038 | H        | 0.67032  | -2.04893 | 1.85319  |

|                                                               |          |          |          |                                                               |          |          |          |                                                               |          |          |          |
|---------------------------------------------------------------|----------|----------|----------|---------------------------------------------------------------|----------|----------|----------|---------------------------------------------------------------|----------|----------|----------|
| H                                                             | 1.78192  | -3.17271 | 0.50352  | H                                                             | -1.11357 | -1.73494 | -1.20686 | C                                                             | 4.88995  | 1.29479  | -0.03365 |
| <b>TSS5 (C<sub>1</sub>): E<sub>tot</sub> = -2980.51101763</b> |          |          |          | C                                                             | -1.20529 | -1.54617 | -3.32706 | H                                                             | 4.05603  | 1.82221  | 0.43779  |
| C                                                             | 1.47043  | -0.63355 | 1.07425  | H                                                             | -0.71491 | -0.57174 | -3.35433 | C                                                             | 5.65926  | 2.30190  | -0.88821 |
| C                                                             | 1.22356  | -2.03455 | 1.00454  | H                                                             | -1.92750 | -1.57319 | -4.14491 | H                                                             | 6.47436  | 1.82125  | -1.43159 |
| H                                                             | 0.94398  | -2.58090 | 0.11554  | H                                                             | -0.44999 | -2.30759 | -3.52671 | H                                                             | 6.08432  | 3.09647  | -0.27581 |
| C                                                             | 1.37318  | -2.57559 | 2.30347  | C                                                             | -2.48341 | -3.19517 | -1.92263 | H                                                             | 5.00079  | 2.76309  | -1.62564 |
| H                                                             | 1.23913  | -3.61112 | 2.57856  | H                                                             | -1.69952 | -3.94785 | -2.02090 | C                                                             | 4.26534  | 0.21080  | -0.91315 |
| C                                                             | 1.73068  | -1.52044 | 3.17944  | H                                                             | -3.19895 | -3.36936 | -2.72751 | H                                                             | 3.58932  | 0.65756  | -1.64452 |
| H                                                             | 1.91401  | -1.61131 | 4.23977  | H                                                             | -3.00425 | -3.37407 | -0.98136 | H                                                             | 3.69310  | -0.50866 | -0.32784 |
| C                                                             | 1.79282  | -0.32458 | 2.42850  | N                                                             | -1.50868 | 0.29304  | 0.03683  | H                                                             | 5.02218  | -0.34550 | -1.46776 |
| H                                                             | 2.02221  | 0.65487  | 2.81931  | H                                                             | -0.07514 | 2.58301  | -0.41106 | C                                                             | 6.14042  | 0.43587  | 4.86849  |
| C                                                             | 2.64884  | 0.62967  | -0.61449 | H                                                             | -0.12505 | 2.35514  | 0.71243  | H                                                             | 5.38365  | 1.20265  | 5.04056  |
| C                                                             | 3.17805  | -0.15785 | -1.64992 | <b>TSS6 (C<sub>2</sub>): E<sub>tot</sub> = -2980.51348765</b> |          |          |          | C                                                             | 7.39444  | 0.89828  | 5.60919  |
| C                                                             | 4.41975  | 0.17863  | -2.17817 | C                                                             | 1.50360  | 3.02707  | 2.07646  | H                                                             | 7.78638  | 1.82377  | 5.18748  |
| H                                                             | 4.84643  | -0.42904 | -2.96653 | C                                                             | 1.16213  | 2.06350  | 1.08359  | H                                                             | 8.19151  | 0.15410  | 5.57862  |
| C                                                             | 5.12254  | 1.27708  | -1.72204 | H                                                             | 1.74552  | 1.82631  | 0.20546  | H                                                             | 7.16469  | 1.07934  | 6.66013  |
| H                                                             | 6.08609  | 1.52350  | -2.14860 | C                                                             | -0.05240 | 1.44464  | 1.46547  | C                                                             | 5.59911  | -0.86970 | 5.45259  |
| C                                                             | 4.58093  | 2.06269  | -0.72386 | H                                                             | -0.56085 | 0.66005  | 0.92517  | H                                                             | 5.39303  | -0.75859 | 6.51843  |
| H                                                             | 5.12796  | 2.93175  | -0.37876 | C                                                             | -0.48625 | 2.04053  | 2.67561  | H                                                             | 6.31908  | -1.68205 | 5.33640  |
| C                                                             | 3.35000  | 1.75623  | -0.15332 | H                                                             | -1.38172 | 1.78594  | 3.22276  | H                                                             | 4.67287  | -1.16929 | 4.96242  |
| C                                                             | 2.46327  | -1.36380 | -2.21725 | C                                                             | 0.46397  | 3.01727  | 3.05143  | N                                                             | 4.40559  | 1.64430  | 2.86955  |
| H                                                             | 1.45364  | -1.38858 | -1.80210 | H                                                             | 0.42412  | 3.63295  | 3.93713  | H                                                             | 4.58967  | 2.52809  | 3.84967  |
| C                                                             | 2.32631  | -1.27268 | -3.73707 | C                                                             | 2.37571  | 5.23734  | 1.81379  | H                                                             | 4.53233  | 3.51122  | 4.14922  |
| H                                                             | 3.29571  | -1.28479 | -4.23691 | C                                                             | 2.22715  | 6.13866  | 2.88041  | <b>TSS7 (C<sub>1</sub>): E<sub>tot</sub> = -2980.50682419</b> |          |          |          |
| H                                                             | 1.80935  | -0.36127 | -4.03714 | C                                                             | 1.94774  | 7.47133  | 2.59434  | C                                                             | 1.80279  | 3.82236  | 1.39144  |
| H                                                             | 1.75886  | -2.12123 | -4.12124 | H                                                             | 1.83692  | 8.18029  | 3.40576  | C                                                             | 1.67725  | 3.23907  | 0.10291  |
| C                                                             | 3.17554  | -2.65674 | -1.81624 | C                                                             | 1.80633  | 7.90946  | 1.29203  | H                                                             | 2.47701  | 3.10897  | -0.61292 |
| H                                                             | 2.61904  | -3.53005 | -2.16271 | H                                                             | 1.58001  | 8.94801  | 1.08860  | C                                                             | 0.32814  | 2.82975  | -0.06454 |
| H                                                             | 3.28927  | -2.73411 | -0.73533 | C                                                             | 1.96526  | 7.01566  | 0.24935  | H                                                             | -0.08114 | 2.34749  | -0.93974 |
| H                                                             | 4.17313  | -2.70838 | -2.25639 | H                                                             | 1.86263  | 7.36892  | -0.76941 | C                                                             | -0.38645 | 3.18330  | 1.10433  |
| C                                                             | 2.81982  | 2.67376  | 0.92749  | C                                                             | 2.26233  | 5.67853  | 0.48490  | H                                                             | -1.43817 | 3.01552  | 1.28157  |
| H                                                             | 1.88571  | 2.25989  | 1.31027  | C                                                             | 2.38364  | 5.73022  | 4.33050  | C                                                             | 0.52136  | 3.78758  | 2.00891  |
| C                                                             | 2.49452  | 4.05642  | 0.36065  | H                                                             | 2.48246  | 4.64440  | 4.37518  | H                                                             | 0.29045  | 4.16541  | 2.99420  |
| H                                                             | 1.80672  | 3.99219  | -0.48384 | C                                                             | 3.66070  | 6.32565  | 4.92457  | C                                                             | 2.90302  | 5.47960  | 2.73850  |
| H                                                             | 3.39190  | 4.56625  | 0.00604  | H                                                             | 3.80117  | 5.99049  | 5.95363  | C                                                             | 2.93221  | 5.48882  | 4.14147  |
| H                                                             | 2.03482  | 4.68790  | 1.12270  | H                                                             | 3.62475  | 7.41658  | 4.93165  | C                                                             | 2.83686  | 6.70926  | 4.80292  |
| C                                                             | 3.78726  | 2.78424  | 2.10619  | H                                                             | 4.54085  | 6.02748  | 4.35466  | H                                                             | 2.86432  | 6.73171  | 5.88594  |
| H                                                             | 3.34243  | 3.37067  | 2.91211  | C                                                             | 1.16627  | 6.11733  | 5.17096  | C                                                             | 2.69364  | 7.89371  | 4.10634  |
| H                                                             | 4.71860  | 3.27760  | 1.82405  | H                                                             | 0.23888  | 5.73908  | 4.73943  | H                                                             | 2.60820  | 8.83191  | 4.63894  |
| H                                                             | 4.04675  | 1.80283  | 2.50385  | H                                                             | 1.06107  | 7.19919  | 5.26478  | C                                                             | 2.66656  | 7.87346  | 2.72341  |
| Fe                                                            | -0.08109 | -1.11720 | 2.27283  | H                                                             | 1.25821  | 5.71469  | 6.18101  | H                                                             | 2.56205  | 8.80643  | 2.18328  |
| N                                                             | 1.39709  | 0.27346  | -0.01198 | C                                                             | 2.44749  | 4.75722  | -0.70028 | C                                                             | 2.78720  | 6.68204  | 2.01872  |
| Si                                                            | -0.06310 | 1.07429  | -0.51812 | H                                                             | 2.81679  | 3.79928  | -0.33178 | C                                                             | 3.05869  | 4.22757  | 4.96450  |
| C                                                             | -1.63279 | -0.24369 | 1.33698  | C                                                             | 3.49888  | 5.29086  | -1.67262 | H                                                             | 3.08412  | 3.38722  | 4.27240  |
| C                                                             | -1.38251 | 0.42585  | 2.56609  | H                                                             | 4.45370  | 5.45123  | -1.17188 | C                                                             | 4.36194  | 4.20538  | 5.76123  |
| H                                                             | -1.08812 | 1.46057  | 2.67011  | H                                                             | 3.19760  | 6.23492  | -2.12877 | H                                                             | 4.46687  | 3.26275  | 6.30294  |
| C                                                             | -1.52660 | -0.51688 | 3.61255  | H                                                             | 3.66088  | 4.58022  | -2.48513 | H                                                             | 4.39896  | 5.01075  | 6.49690  |
| H                                                             | -1.38528 | -0.31954 | 4.66485  | C                                                             | 1.11683  | 4.50531  | -1.40961 | H                                                             | 5.22274  | 4.31005  | 5.10146  |
| C                                                             | -1.89333 | -1.75984 | 3.04067  | H                                                             | 1.24306  | 3.79379  | -2.22812 | C                                                             | 1.85019  | 4.02160  | 5.87712  |
| H                                                             | -2.07916 | -2.67673 | 3.57981  | H                                                             | 0.71439  | 5.42672  | -1.83472 | H                                                             | 0.91989  | 3.99543  | 5.30871  |
| C                                                             | -1.96036 | -1.59549 | 1.63707  | H                                                             | 0.37139  | 4.10198  | -0.72464 | H                                                             | 1.75988  | 4.81574  | 6.61975  |
| H                                                             | -2.20844 | -2.36105 | 0.91712  | Fe                                                            | 1.39080  | 1.20775  | 2.91289  | H                                                             | 1.93547  | 3.07842  | 6.42098  |
| C                                                             | -2.69759 | 0.29611  | -0.75571 | N                                                             | 2.64857  | 3.85261  | 2.08398  | C                                                             | 2.77717  | 6.71457  | 0.50475  |
| C                                                             | -3.65271 | 1.30266  | -0.55236 | Si                                                            | 4.36806  | 3.52577  | 2.30863  | H                                                             | 3.09288  | 5.73631  | 0.13964  |
| C                                                             | -4.82423 | 1.26949  | -1.29958 | C                                                             | 3.32106  | 0.85991  | 3.34058  | C                                                             | 3.76902  | 7.73380  | -0.05547 |
| H                                                             | -5.57722 | 2.03347  | -1.14858 | C                                                             | 2.77107  | -0.28060 | 2.69617  | H                                                             | 4.77417  | 7.56732  | 0.33271  |
| C                                                             | -5.04229 | 0.28125  | -2.24209 | H                                                             | 3.11611  | -0.70800 | 1.76701  | H                                                             | 3.48740  | 8.76080  | 0.18189  |
| H                                                             | -5.95665 | 0.27415  | -2.82094 | C                                                             | 1.69905  | -0.75449 | 3.49045  | H                                                             | 3.81297  | 7.65718  | -1.14298 |
| C                                                             | -4.08476 | -0.69472 | -2.44558 | H                                                             | 1.07509  | -1.60576 | 3.26370  | C                                                             | 1.36670  | 6.97353  | -0.02661 |
| H                                                             | -4.26002 | -1.45956 | -3.19241 | C                                                             | 1.58528  | 0.08398  | 4.62548  | H                                                             | 1.35697  | 6.96036  | -1.11790 |
| C                                                             | -2.90682 | -0.71268 | -1.70575 | H                                                             | 0.85857  | -0.01326 | 5.41811  | H                                                             | 0.99747  | 7.94879  | 0.29706  |
| C                                                             | -3.45247 | 2.41028  | 0.45880  | C                                                             | 2.59643  | 1.07357  | 4.54688  | H                                                             | 0.66444  | 6.21649  | 0.32165  |
| H                                                             | -2.42918 | 2.35350  | 0.83294  | H                                                             | 2.76603  | 1.86927  | 5.25848  | Fe                                                            | 1.17066  | 1.90115  | 1.56337  |
| C                                                             | -3.61466 | 3.79341  | -0.17064 | C                                                             | 5.53150  | 0.88064  | 2.41946  | N                                                             | 2.98171  | 4.25470  | 2.01180  |
| H                                                             | -4.63435 | 3.97432  | -0.51425 | C                                                             | 5.77083  | 0.70652  | 1.04807  | Si                                                            | 4.53503  | 3.44533  | 1.85305  |
| H                                                             | -2.95066 | 3.92010  | -1.02636 | C                                                             | 6.87079  | -0.05059 | 0.65940  | C                                                             | 2.83579  | 0.96704  | 2.21548  |
| H                                                             | -3.37694 | 4.57099  | 0.55702  | H                                                             | 7.07478  | -0.19081 | -0.39523 | C                                                             | 2.21969  | 0.19537  | 1.18697  |
| C                                                             | -4.38645 | 2.22929  | 1.65529  | C                                                             | 7.70369  | -0.63958 | 1.59123  | H                                                             | 2.66434  | -0.07040 | 0.24145  |
| H                                                             | -4.20922 | 3.00324  | 2.40426  | H                                                             | 8.54941  | -1.23206 | 1.26794  | C                                                             | 0.91915  | -0.15226 | 1.61847  |
| H                                                             | -4.23278 | 1.26091  | 2.13140  | C                                                             | 7.44928  | -0.46721 | 2.93900  | H                                                             | 0.20113  | -0.72960 | 1.05545  |
| H                                                             | -5.43432 | 2.29303  | 1.35563  | H                                                             | 8.10400  | -0.93401 | 3.66436  | C                                                             | 0.71997  | 0.39942  | 2.90658  |
| C                                                             | -1.88307 | -1.79111 | -1.97999 | C                                                             | 6.37455  | 0.29667  | 3.37834  | H                                                             | -0.17395 | 0.31411  | 3.50586  |

|                                                                |          |          |          |                                                                |          |          |          |                                                                 |          |          |          |
|----------------------------------------------------------------|----------|----------|----------|----------------------------------------------------------------|----------|----------|----------|-----------------------------------------------------------------|----------|----------|----------|
| C                                                              | 1.90715  | 1.07276  | 3.28547  | H                                                              | -0.91981 | 5.55931  | 2.54285  | H                                                               | 1.96713  | 5.46634  | 9.40617  |
| H                                                              | 2.06357  | 1.59695  | 4.21632  | Fe                                                             | 1.13282  | 1.27430  | 2.14146  | H                                                               | 2.30352  | 7.13862  | 8.98194  |
| C                                                              | 5.21108  | 0.59670  | 2.01030  | N                                                              | 2.50518  | 4.05695  | 1.99751  | C                                                               | -0.26614 | 6.45463  | 8.13592  |
| C                                                              | 5.75846  | 0.29397  | 0.75463  | Si                                                             | 4.18040  | 3.14768  | 1.30342  | H                                                               | -0.24850 | 7.45146  | 8.57913  |
| C                                                              | 6.82296  | -0.60144 | 0.69460  | C                                                              | 3.03613  | 0.62693  | 2.05450  | H                                                               | -0.53591 | 5.75251  | 8.92711  |
| H                                                              | 7.26316  | -0.84076 | -0.26563 | C                                                              | 2.22085  | -0.14660 | 1.17563  | H                                                               | -1.06079 | 6.44568  | 7.38950  |
| C                                                              | 7.32565  | -1.19983 | 1.83244  | H                                                              | 2.33335  | -0.21742 | 0.10531  | C                                                               | 1.93536  | 6.94630  | 2.51826  |
| H                                                              | 8.14970  | -1.89761 | 1.76169  | C                                                              | 1.21649  | -0.77825 | 1.94257  | H                                                               | 2.17438  | 5.88337  | 2.50446  |
| C                                                              | 6.76723  | -0.90539 | 3.06243  | H                                                              | 0.43584  | -1.41824 | 1.55887  | C                                                               | 3.04518  | 7.68861  | 1.77144  |
| H                                                              | 7.16136  | -1.38361 | 3.95050  | C                                                              | 1.40060  | -0.40994 | 3.29793  | H                                                               | 3.98191  | 7.69775  | 2.32878  |
| C                                                              | 5.71519  | -0.00619 | 3.17773  | H                                                              | 0.78938  | -0.72440 | 4.13084  | H                                                               | 2.77817  | 8.72680  | 1.56836  |
| C                                                              | 5.24012  | 0.86542  | -0.54878 | C                                                              | 2.53258  | 0.43453  | 3.37236  | H                                                               | 3.23333  | 7.21808  | 0.80472  |
| H                                                              | 4.37525  | 1.49555  | -0.33352 | H                                                              | 2.93292  | 0.87530  | 4.27169  | C                                                               | 0.60445  | 7.15147  | 1.78971  |
| C                                                              | 6.29618  | 1.73271  | -1.23600 | C                                                              | 5.28702  | 0.72090  | 1.20671  | H                                                               | 0.65585  | 6.76637  | 0.76864  |
| H                                                              | 7.15559  | 1.13665  | -1.54773 | C                                                              | 5.47547  | 0.49526  | -0.16997 | H                                                               | 0.36025  | 8.21402  | 1.72971  |
| H                                                              | 6.66210  | 2.52069  | -0.57953 | C                                                              | 6.61789  | -0.18590 | -0.58321 | H                                                               | -0.21871 | 6.65156  | 2.29674  |
| H                                                              | 5.88392  | 2.20488  | -2.12920 | H                                                              | 6.78087  | -0.35867 | -1.64015 | Fe                                                              | -0.11301 | 2.55071  | 4.24950  |
| C                                                              | 4.77795  | -0.24055 | -1.50141 | C                                                              | 7.54200  | -0.66040 | 0.32533  | N                                                               | 1.60710  | 5.03485  | 4.73496  |
| H                                                              | 4.29357  | 0.19110  | -2.37865 | H                                                              | 8.41583  | -1.19944 | -0.01706 | Si                                                              | 2.74138  | 3.94290  | 5.64548  |
| H                                                              | 4.07315  | -0.92478 | -1.02911 | C                                                              | 7.34257  | -0.44220 | 1.67582  | C                                                               | 1.65042  | 1.56652  | 4.60789  |
| H                                                              | 5.61597  | -0.84136 | -1.85741 | H                                                              | 8.06938  | -0.81968 | 2.38444  | C                                                               | 1.03658  | 1.09419  | 3.41576  |
| C                                                              | 5.13801  | 0.25483  | 4.55430  | C                                                              | 6.23495  | 0.25848  | 2.13626  | H                                                               | 1.48046  | 1.11577  | 2.43096  |
| H                                                              | 4.43757  | 1.08941  | 4.49492  | C                                                              | 4.50173  | 0.93702  | -1.24540 | C                                                               | -0.23767 | 0.56888  | 3.74977  |
| C                                                              | 6.20961  | 0.66271  | 5.56380  | H                                                              | 3.63690  | 1.40185  | -0.76935 | H                                                               | -0.94187 | 0.13214  | 3.05725  |
| H                                                              | 6.76690  | 1.53331  | 5.21805  | C                                                              | 5.12195  | 1.98610  | -2.16806 | C                                                               | -0.42630 | 0.73080  | 5.14223  |
| H                                                              | 6.92439  | -0.13847 | 5.75628  | H                                                              | 5.97477  | 1.58320  | -2.71724 | H                                                               | -1.29973 | 0.43868  | 5.70611  |
| H                                                              | 5.74872  | 0.91849  | 6.51920  | H                                                              | 5.46384  | 2.85314  | -1.60450 | C                                                               | 0.73684  | 1.34149  | 5.67831  |
| C                                                              | 4.34287  | -0.95855 | 5.03800  | H                                                              | 4.39030  | 2.33361  | -2.89915 | H                                                               | 0.88749  | 1.60312  | 6.71513  |
| H                                                              | 3.88474  | -0.75705 | 6.00788  | C                                                              | 3.99636  | -0.25351 | -2.06465 | C                                                               | 3.85650  | 1.58929  | 3.72273  |
| H                                                              | 4.98517  | -1.83392 | 5.15037  | H                                                              | 3.20317  | 0.06206  | -2.74457 | C                                                               | 4.39830  | 2.34911  | 2.67483  |
| H                                                              | 3.54791  | -1.21362 | 4.33737  | H                                                              | 3.60435  | -1.04918 | -1.43067 | C                                                               | 5.35432  | 1.77815  | 1.83528  |
| N                                                              | 4.13566  | 1.53972  | 2.14584  | H                                                              | 4.78888  | -0.69064 | -2.67389 | H                                                               | 5.78390  | 2.37877  | 1.04336  |
| H                                                              | 4.68753  | 2.40341  | 3.05680  | C                                                              | 6.07682  | 0.46963  | 3.62458  | C                                                               | 5.75205  | 0.46788  | 1.96733  |
| H                                                              | 4.91267  | 3.51317  | 0.40765  | H                                                              | 5.27179  | 1.18852  | 3.77475  | H                                                               | 6.49781  | 0.04561  | 1.30709  |
| <b>TSS8 (C<sub>1</sub>):</b> E <sub>tot</sub> = -3131.91949474 |          |          |          | C                                                              | 7.33364  | 1.06885  | 4.25237  | C                                                               | 5.15238  | -0.30574 | 2.94090  |
| C                                                              | 1.29747  | 3.27971  | 1.94334  | H                                                              | 7.58636  | 2.01918  | 3.78331  | H                                                               | 5.42463  | -1.35110 | 3.01935  |
| C                                                              | 0.74199  | 2.72850  | 0.75771  | H                                                              | 8.19692  | 0.40726  | 4.16745  | C                                                               | 4.20728  | 0.21589  | 3.81421  |
| H                                                              | 1.16060  | 2.80636  | -0.23496 | H                                                              | 7.17787  | 1.25069  | 5.31712  | C                                                               | 3.96615  | 3.75134  | 2.31879  |
| C                                                              | -0.45963 | 2.06854  | 1.11566  | C                                                              | 5.68197  | -0.83638 | 4.31513  | H                                                               | 3.23822  | 4.10191  | 3.04735  |
| H                                                              | -1.11156 | 1.53891  | 0.43718  | H                                                              | 5.50856  | -0.67374 | 5.38102  | C                                                               | 5.15168  | 4.71705  | 2.30879  |
| C                                                              | -0.65763 | 2.23137  | 2.50731  | H                                                              | 6.46795  | -1.58833 | 4.22079  | H                                                               | 5.82693  | 4.51850  | 1.47509  |
| H                                                              | -1.48646 | 1.84742  | 3.08279  | H                                                              | 4.77051  | -1.25303 | 3.88646  | H                                                               | 5.74029  | 4.63859  | 3.22237  |
| C                                                              | 0.42516  | 2.98474  | 3.02226  | N                                                              | 4.13402  | 1.42841  | 1.68559  | H                                                               | 4.81364  | 5.74666  | 2.19752  |
| H                                                              | 0.55481  | 3.29590  | 4.04683  | O                                                              | 5.43950  | 3.74311  | 2.22424  | C                                                               | 3.25714  | 3.75183  | 0.96180  |
| C                                                              | 2.47128  | 5.06700  | 3.04944  | H                                                              | 5.88632  | 4.48694  | 1.81546  | H                                                               | 2.89859  | 4.75187  | 0.70945  |
| C                                                              | 3.10296  | 4.89348  | 4.29206  | H                                                              | 2.52573  | 4.62997  | 0.96331  | H                                                               | 2.39892  | 3.07861  | 0.96428  |
| C                                                              | 3.07930  | 5.95457  | 5.19605  | H                                                              | 3.70698  | 4.02993  | -0.08767 | H                                                               | 3.92068  | 3.43273  | 0.15671  |
| H                                                              | 3.57545  | 5.84155  | 6.15116  | O                                                              | 2.78993  | 4.89221  | -0.34496 | C                                                               | 3.58680  | -0.79222 | 4.77261  |
| C                                                              | 2.42882  | 7.13754  | 4.91968  | H                                                              | 3.19809  | 5.75204  | -0.48187 | H                                                               | 2.87986  | -0.29704 | 5.43620  |
| H                                                              | 2.43455  | 7.94697  | 5.63777  | <b>TSS9 (C<sub>1</sub>):</b> E <sub>tot</sub> = -3208.19847345 |          |          |          | C                                                               | 4.64567  | -1.49937 | 5.62903  |
| C                                                              | 1.73737  | 7.25920  | 3.73166  | C                                                              | 0.35775  | 4.52503  | 4.31802  | H                                                               | 5.36568  | -0.80795 | 6.07151  |
| H                                                              | 1.17909  | 8.16582  | 3.53497  | C                                                              | 0.01205  | 4.14005  | 2.99100  | H                                                               | 5.23079  | -2.20523 | 5.03879  |
| C                                                              | 1.72451  | 6.23626  | 2.79115  | H                                                              | 0.66161  | 4.19955  | 2.13052  | H                                                               | 4.17450  | -2.07696 | 6.42742  |
| C                                                              | 3.73821  | 3.61136  | 4.79069  | C                                                              | -1.31344 | 3.64601  | 2.99907  | C                                                               | 2.76005  | -1.83465 | 4.01624  |
| H                                                              | 3.79682  | 2.89268  | 3.97554  | H                                                              | -1.85538 | 3.26776  | 2.14479  | H                                                               | 2.28827  | -2.52636 | 4.71633  |
| C                                                              | 5.15190  | 3.82641  | 5.33009  | C                                                              | -1.80344 | 3.72787  | 4.32711  | H                                                               | 3.37977  | -2.42212 | 3.33715  |
| H                                                              | 5.60773  | 2.86617  | 5.57020  | H                                                              | -2.78358 | 3.42099  | 4.66138  | H                                                               | 1.97118  | -1.36392 | 3.43348  |
| H                                                              | 5.14844  | 4.41404  | 6.24952  | C                                                              | -0.78136 | 4.26815  | 5.13923  | N                                                               | 2.95095  | 2.14099  | 4.70919  |
| H                                                              | 5.78964  | 4.32418  | 4.60622  | H                                                              | -0.84593 | 4.43809  | 6.20307  | O                                                               | 4.05494  | 1.41219  | 6.92010  |
| C                                                              | 2.87639  | 2.98357  | 5.89139  | C                                                              | 1.61715  | 6.44464  | 5.01473  | O                                                               | 2.75030  | 2.69126  | 8.45174  |
| H                                                              | 1.87543  | 2.73216  | 5.54413  | C                                                              | 1.40874  | 6.93716  | 6.32041  | H                                                               | 3.48982  | 1.94175  | 7.75829  |
| H                                                              | 2.77178  | 3.65285  | 6.74661  | C                                                              | 1.47112  | 8.30907  | 6.55031  | H                                                               | 2.52705  | 3.28049  | 7.57325  |
| H                                                              | 3.33888  | 2.06366  | 6.25621  | H                                                              | 1.32941  | 8.68404  | 7.55681  | H                                                               | 3.27273  | 3.27134  | 9.01746  |
| C                                                              | 0.82142  | 6.43931  | 1.58476  | C                                                              | 1.68968  | 9.20699  | 5.52736  | H                                                               | 4.06899  | 0.45627  | 7.02565  |
| H                                                              | 0.90685  | 5.60626  | 0.89328  | H                                                              | 1.72799  | 10.26987 | 5.72717  | H                                                               | 3.57700  | 1.67294  | 5.95849  |
| C                                                              | 1.19223  | 7.69396  | 0.79484  | C                                                              | 1.84254  | 8.72879  | 4.24152  | O                                                               | 4.21172  | 4.71611  | 5.44805  |
| H                                                              | 2.24411  | 7.69111  | 0.50808  | H                                                              | 1.98871  | 9.43369  | 3.43288  | H                                                               | 4.30519  | 5.32279  | 4.70880  |
| H                                                              | 1.01276  | 8.60880  | 1.36155  | C                                                              | 1.81405  | 7.36668  | 3.96424  | <b>TSS10 (C<sub>1</sub>):</b> E <sub>tot</sub> = -3055.63302411 |          |          |          |
| H                                                              | 0.59839  | 7.75410  | -0.11777 | C                                                              | 1.08212  | 6.07245  | 7.52211  | C                                                               | 1.17225  | 3.22262  | 2.13710  |
| C                                                              | -0.64346 | 6.47778  | 2.02501  | H                                                              | 1.06064  | 5.03396  | 7.20134  | C                                                               | 0.61369  | 2.72907  | 0.92415  |
| H                                                              | -1.29542 | 6.57740  | 1.15577  | C                                                              | 2.19215  | 6.13389  | 8.57108  | H                                                               | 1.02984  | 2.84958  | -0.06594 |
| H                                                              | -0.85034 | 7.31640  | 2.69197  | H                                                              | 3.15411  | 5.84953  | 8.14227  | C                                                               | -0.57607 | 2.03078  | 1.24947  |

|    |          |          |          |                                                                   |          |          |          |                                                                   |          |          |          |
|----|----------|----------|----------|-------------------------------------------------------------------|----------|----------|----------|-------------------------------------------------------------------|----------|----------|----------|
| H  | -1.22551 | 1.53276  | 0.54522  | H                                                                 | 5.48477  | -0.68421 | 5.28699  | H                                                                 | -2.31401 | 4.59670  | 0.48487  |
| C  | -0.76696 | 2.11102  | 2.64888  | H                                                                 | 6.43992  | -1.56382 | 4.09534  | C                                                                 | -3.63953 | 2.52757  | 1.76179  |
| H  | -1.58798 | 1.68401  | 3.20475  | H                                                                 | 4.73422  | -1.24143 | 3.79017  | H                                                                 | -3.21862 | 3.25209  | 2.46174  |
| C  | 0.30891  | 2.84948  | 3.20013  | N                                                                 | 4.03726  | 1.45870  | 1.64865  | H                                                                 | -3.64182 | 1.55267  | 2.24944  |
| H  | 0.44965  | 3.09571  | 4.24157  | O                                                                 | 5.32800  | 3.86119  | 1.98650  | H                                                                 | -4.67778 | 2.81139  | 1.57858  |
| C  | 2.36560  | 5.02501  | 3.17792  | H                                                                 | 5.71936  | 3.37898  | 2.72078  | C                                                                 | -2.52006 | -2.01781 | -1.93504 |
| C  | 2.98125  | 4.93587  | 4.43546  | H                                                                 | 2.77130  | 4.22364  | 0.99402  | H                                                                 | -1.64152 | -2.10646 | -1.29264 |
| C  | 2.88611  | 6.02283  | 5.29899  | <b>TSS11</b> (C <sub>1</sub> ): E <sub>tot</sub> = -3055.62830834 |          |          |          | C                                                                 | -2.03059 | -2.04187 | -3.38339 |
| C  | 3.34944  | 5.96782  | 6.27660  | C                                                                 | 1.51638  | -1.09022 | 0.80689  | H                                                                 | -1.35047 | -1.21322 | -3.57772 |
| C  | 2.20650  | 7.17062  | 4.94179  | C                                                                 | 1.06729  | -2.41551 | 0.54964  | H                                                                 | -2.86264 | -1.97040 | -4.08619 |
| H  | 2.14137  | 8.00253  | 5.63060  | H                                                                 | 0.65160  | -2.77258 | -0.38332 | H                                                                 | -1.49937 | -2.97192 | -3.59538 |
| C  | 1.61360  | 7.24976  | 3.69523  | C                                                                 | 1.21828  | -3.17148 | 1.73883  | C                                                                 | -3.41540 | -3.22451 | -1.64865 |
| H  | 1.08507  | 8.15344  | 3.41813  | H                                                                 | 0.95301  | -4.21033 | 1.86614  | H                                                                 | -2.85748 | -4.15298 | -1.78095 |
| C  | 1.68336  | 6.19536  | 2.79419  | C                                                                 | 1.79996  | -2.33293 | 2.71980  | H                                                                 | -4.27198 | -3.26427 | -2.32312 |
| C  | 3.72344  | 3.70948  | 4.91823  | C                                                                 | 2.05279  | -2.61843 | 3.72982  | H                                                                 | -3.80715 | -3.20796 | -0.63106 |
| H  | 3.77699  | 2.99355  | 4.09793  | C                                                                 | 1.98145  | -1.04899 | 2.15248  | N                                                                 | -1.43216 | 0.02007  | -0.08597 |
| C  | 5.15249  | 4.05174  | 5.34257  | H                                                                 | 2.38667  | -0.18536 | 2.65600  | O                                                                 | 0.12426  | 2.12103  | -1.46912 |
| H  | 5.72182  | 3.14301  | 5.54587  | C                                                                 | 2.60075  | 0.70640  | -0.41848 | H                                                                 | 1.03278  | 2.46458  | -1.43985 |
| H  | 5.17008  | 4.64779  | 6.25611  | C                                                                 | 3.41951  | 0.20905  | -1.44806 | H                                                                 | 0.03692  | 1.26003  | -2.37954 |
| C  | 5.67475  | 4.62476  | 4.57701  | C                                                                 | 4.53819  | 0.94444  | -1.82380 | <b>TSS12</b> (C <sub>1</sub> ): E <sub>tot</sub> = -3131.90660263 |          |          |          |
| C  | 2.98540  | 3.01839  | 6.06510  | H                                                                 | 5.18293  | 0.57334  | -2.61069 | C                                                                 | 1.37864  | -0.51548 | 1.48118  |
| H  | 1.98683  | 2.69937  | 5.76755  | C                                                                 | 4.84148  | 2.14926  | -1.21580 | C                                                                 | 1.21917  | -1.92521 | 1.55163  |
| H  | 2.87885  | 3.67666  | 6.92869  | H                                                                 | 5.71023  | 2.71273  | -1.53032 | H                                                                 | 1.08314  | -2.59275 | 0.71129  |
| H  | 3.53162  | 2.13203  | 6.39547  | C                                                                 | 4.03639  | 2.62596  | -0.19830 | C                                                                 | 1.24789  | -2.29575 | 2.91636  |
| C  | 0.99722  | 6.34756  | 1.45152  | H                                                                 | 4.29045  | 3.56230  | 0.28397  | H                                                                 | 1.14469  | -3.29957 | 3.29924  |
| H  | 1.28607  | 5.51790  | 0.80474  | C                                                                 | 2.91686  | 1.91618  | 0.22786  | C                                                                 | 1.44595  | -1.12327 | 3.68332  |
| C  | 1.42781  | 7.62305  | 0.72788  | C                                                                 | 3.14323  | -1.11691 | -2.12269 | H                                                                 | 1.51491  | -1.07042 | 4.75930  |
| H  | 2.51135  | 7.67171  | 0.62088  | H                                                                 | 2.12619  | -1.42175 | -1.87588 | C                                                                 | 1.52116  | -0.01783 | 2.80343  |
| H  | 1.10311  | 8.52490  | 1.24869  | C                                                                 | 3.20954  | -1.02893 | -3.64548 | H                                                                 | 1.63969  | 1.00753  | 3.10571  |
| H  | 0.99012  | 7.65376  | -0.27093 | H                                                                 | 4.21196  | -0.79735 | -4.00874 | C                                                                 | 2.67438  | 0.70926  | -0.20257 |
| C  | -0.52280 | 6.28438  | 1.60808  | H                                                                 | 2.52835  | -0.26744 | -4.02595 | C                                                                 | 3.33724  | -0.02032 | -1.20182 |
| H  | -1.01256 | 6.35784  | 0.63573  | H                                                                 | 2.92081  | -1.98296 | -4.08847 | C                                                                 | 4.61216  | 0.38606  | -1.57514 |
| H  | -0.89027 | 7.10460  | 2.22773  | C                                                                 | 4.09015  | -2.18899 | -1.58141 | H                                                                 | 5.14648  | -0.17091 | -2.33380 |
| H  | -0.83600 | 5.34820  | 2.06999  | H                                                                 | 3.86886  | -3.15972 | -2.02832 | C                                                                 | 5.20966  | 1.49118  | -1.00496 |
| Fe | 1.04254  | 1.21048  | 2.21978  | H                                                                 | 3.99547  | -2.28984 | -0.50020 | H                                                                 | 6.20344  | 1.79238  | -1.30798 |
| N  | 2.39378  | 3.93096  | 2.26416  | H                                                                 | 5.13103  | -1.94853 | -1.80668 | C                                                                 | 4.51881  | 2.21981  | -0.06058 |
| Si | 3.98257  | 3.19738  | 1.28057  | C                                                                 | 2.12710  | 2.44350  | 1.40953  | H                                                                 | 4.97935  | 3.10305  | 0.36208  |
| C  | 2.96973  | 0.62836  | 2.04726  | H                                                                 | 1.31960  | 1.73784  | 1.60745  | C                                                                 | 3.24228  | 1.85859  | 0.36146  |
| C  | 2.14722  | -0.16709 | 1.19445  | C                                                                 | 1.49567  | 3.81279  | 1.15336  | C                                                                 | 2.76660  | -1.22369 | -1.93273 |
| H  | 2.22694  | -0.23194 | 0.12021  | H                                                                 | 0.76302  | 3.78640  | 0.34778  | H                                                                 | 1.71986  | -1.39829 | -1.66279 |
| C  | 1.19604  | -0.83869 | 1.99419  | H                                                                 | 2.24639  | 4.56428  | 0.90233  | C                                                                 | 2.74085  | -0.97983 | -3.44122 |
| H  | 0.42708  | -1.50709 | 1.63630  | H                                                                 | 0.97726  | 4.16192  | 2.04817  | H                                                                 | 3.74348  | -0.86419 | -3.85311 |
| C  | 1.41693  | -0.47086 | 3.34476  | C                                                                 | 3.01448  | 2.51263  | 2.65572  | H                                                                 | 2.17026  | -0.08150 | -3.67292 |
| H  | 0.84954  | -0.81243 | 4.19776  | H                                                                 | 2.41689  | 2.74321  | 3.53919  | H                                                                 | 2.27397  | -1.82084 | -3.95439 |
| C  | 2.51712  | 0.41828  | 3.38155  | H                                                                 | 3.77322  | 3.29164  | 2.56385  | C                                                                 | 3.52220  | -2.50109 | -1.56824 |
| H  | 2.92822  | 0.87973  | 4.26707  | H                                                                 | 3.54008  | 1.57536  | 2.83793  | H                                                                 | 3.07631  | -3.36529 | -2.06324 |
| C  | 5.18984  | 0.77628  | 1.14166  | Fe                                                                | 0.00476  | -1.53376 | 2.05575  | H                                                                 | 3.50883  | -2.68030 | -0.49247 |
| C  | 5.36085  | 0.57885  | -0.24026 | N                                                                 | 1.40872  | 0.01100  | -0.06327 | H                                                                 | 4.56657  | -2.44768 | -1.87820 |
| C  | 6.50989  | -0.07109 | -0.68322 | Si                                                                | -0.01664 | 0.27112  | -1.07468 | C                                                                 | 2.59383  | 2.76132  | 1.39261  |
| H  | 6.66115  | -0.22017 | -1.74541 | C                                                                 | -1.49166 | -0.46869 | 1.23655  | H                                                                 | 1.59030  | 2.39551  | 1.61530  |
| C  | 7.45861  | -0.54129 | 0.20232  | C                                                                 | -1.04245 | 0.18064  | 2.41870  | C                                                                 | 2.41715  | 4.18482  | 0.85943  |
| H  | 8.33877  | -1.05377 | -0.16337 | H                                                                 | -0.61528 | 1.17166  | 2.46940  | H                                                                 | 1.81333  | 4.21200  | -0.04648 |
| C  | 7.27702  | -0.35126 | 1.55970  | C                                                                 | -1.21119 | -0.71318 | 3.50462  | H                                                                 | 3.37981  | 4.65399  | 0.64901  |
| H  | 8.02412  | -0.72481 | 2.24917  | H                                                                 | -0.94843 | -0.51600 | 4.53325  | H                                                                 | 1.91814  | 4.79801  | 1.61241  |
| C  | 6.16107  | 0.31592  | 2.04881  | C                                                                 | -1.80045 | -1.90223 | 3.00830  | C                                                                 | 3.41064  | 2.78607  | 2.68931  |
| C  | 4.36076  | 1.03286  | -1.28544 | H                                                                 | -2.06212 | -2.77210 | 3.59194  | H                                                                 | 2.86151  | 3.30858  | 3.47481  |
| H  | 3.48350  | 1.44008  | -0.77903 | C                                                                 | -1.97363 | -1.75729 | 1.61333  | H                                                                 | 4.35103  | 3.32116  | 2.54990  |
| C  | 4.93421  | 2.15188  | -2.15464 | H                                                                 | -2.38845 | -2.49548 | 0.94384  | H                                                                 | 3.66029  | 1.78837  | 3.05016  |
| H  | 5.81577  | 1.81981  | -2.70580 | C                                                                 | -2.68883 | 0.24453  | -0.73145 | Fe                                                                | -0.27067 | -0.94023 | 2.55519  |
| H  | 5.22008  | 3.01448  | -1.55261 | C                                                                 | -3.37429 | 1.44334  | -0.47678 | N                                                                 | 1.36263  | 0.21752  | 0.23403  |
| H  | 4.19481  | 2.48839  | -2.88339 | C                                                                 | -4.59956 | 1.65510  | -1.09756 | Si                                                                | -0.22880 | 1.38555  | -0.28449 |
| C  | 3.88721  | -0.13418 | -2.15441 | H                                                                 | -5.14693 | 2.56903  | -0.90168 | C                                                                 | -1.75164 | -0.20737 | 1.38823  |
| H  | 3.08139  | 0.18776  | -2.81607 | C                                                                 | -5.12847 | 0.72341  | -1.97171 | C                                                                 | -1.64907 | 0.56679  | 2.57791  |
| H  | 3.51997  | -0.96569 | -1.55213 | H                                                                 | -6.07963 | 0.90820  | -2.45389 | H                                                                 | -1.42195 | 1.62292  | 2.62461  |
| H  | 4.68719  | -0.52230 | -2.78661 | C                                                                 | -4.43517 | -0.44370 | -2.22979 | C                                                                 | -1.85852 | -0.29453 | 3.68353  |
| C  | 6.01998  | 0.49732  | 3.54423  | H                                                                 | -4.85410 | -1.16473 | -2.92134 | H                                                                 | -1.83340 | -0.00593 | 4.72391  |
| H  | 5.20251  | 1.19892  | 3.72201  | C                                                                 | -3.21687 | -0.71211 | -1.61333 | C                                                                 | -2.12449 | -1.59275 | 3.84733  |
| C  | 7.27843  | 1.09053  | 4.17789  | C                                                                 | -2.83371 | 2.49877  | 0.46282  | H                                                                 | -2.33691 | -2.46956 | 3.77794  |
| H  | 7.56721  | 2.03156  | 3.70654  | H                                                                 | -1.80638 | 2.23623  | 0.71210  | C                                                                 | -2.05497 | -1.54384 | 1.77211  |
| H  | 8.13316  | 0.41715  | 4.10498  | C                                                                 | -2.78313 | 3.87879  | -0.19042 | H                                                                 | -2.20428 | -2.37353 | 1.09777  |
| H  | 7.11609  | 1.28324  | 5.23957  | H                                                                 | -3.77648 | 4.26263  | -0.42857 | C                                                                 | -2.58631 | 0.04098  | -0.84114 |
| C  | 5.64608  | -0.82430 | 4.21616  | H                                                                 | -2.19947 | 3.85393  | -1.10971 | C                                                                 | -3.65364 | 0.95159  | -0.83427 |

|                                                                   |          |          |          |                                                                   |          |          |          |                                                                   |          |          |          |
|-------------------------------------------------------------------|----------|----------|----------|-------------------------------------------------------------------|----------|----------|----------|-------------------------------------------------------------------|----------|----------|----------|
| C                                                                 | -4.72370 | 0.73350  | -1.69458 | H                                                                 | 3.37907  | 1.86048  | 3.18709  | H                                                                 | 1.85315  | 4.75396  | 0.33930  |
| H                                                                 | -5.55820 | 1.42443  | -1.69577 | Fe                                                                | -0.33891 | -0.88358 | 2.41697  | H                                                                 | 0.33388  | 4.34725  | 1.14232  |
| C                                                                 | -4.73966 | -0.34776 | -2.55532 | N                                                                 | 1.41176  | 0.05114  | 0.07959  | H                                                                 | 0.38024  | 5.62829  | -0.06475 |
| H                                                                 | -5.57897 | -0.50174 | -3.22089 | Si                                                                | -0.18049 | 1.33357  | -0.63543 | C                                                                 | -3.75284 | 0.71856  | -0.66768 |
| C                                                                 | -3.67344 | -1.22735 | -2.56657 | C                                                                 | -1.72948 | 0.13678  | 1.34704  | H                                                                 | -3.05959 | -0.00858 | -0.24270 |
| H                                                                 | -3.68737 | -2.06517 | -3.25330 | C                                                                 | -1.29967 | 0.92365  | 2.44959  | C                                                                 | -4.27146 | 0.14204  | -1.98628 |
| C                                                                 | -2.58707 | -1.05334 | -1.71614 | H                                                                 | -0.83625 | 1.89858  | 2.38602  | H                                                                 | -3.45208 | -0.06674 | -2.67502 |
| C                                                                 | -3.68375 | 2.16416  | 0.07138  | C                                                                 | -1.57825 | 0.20497  | 3.64058  | H                                                                 | -4.95124 | 0.83280  | -2.48723 |
| H                                                                 | -2.73379 | 2.22783  | 0.60286  | H                                                                 | -1.36413 | 0.53880  | 4.64492  | H                                                                 | -4.83054 | -0.78155 | -1.81619 |
| C                                                                 | -3.81849 | 3.45800  | -0.73068 | C                                                                 | -2.20966 | -1.00930 | 3.28083  | C                                                                 | -4.90626 | 0.90789  | 0.31926  |
| H                                                                 | -4.76923 | 3.51706  | -1.26228 | H                                                                 | -2.55696 | -1.77131 | 3.96233  | H                                                                 | -5.34652 | -0.05537 | 0.58310  |
| H                                                                 | -3.02119 | 3.54281  | -1.46954 | C                                                                 | -2.29842 | -1.05793 | 1.86814  | H                                                                 | -5.70347 | 1.52319  | -0.10098 |
| H                                                                 | -3.75974 | 4.32391  | -0.06930 | H                                                                 | -2.72656 | -1.85570 | 1.27943  | H                                                                 | -4.57814 | 1.39248  | 1.23868  |
| C                                                                 | -4.78210 | 2.03804  | 1.12616  | C                                                                 | -2.69221 | 0.20408  | -0.84548 | Fe                                                                | -0.06032 | -0.18084 | 2.49400  |
| H                                                                 | -4.77099 | 2.89722  | 1.79914  | C                                                                 | -3.79229 | 1.07104  | -0.73075 | N                                                                 | -0.85972 | 1.11391  | -0.12236 |
| H                                                                 | -4.64700 | 1.13882  | 1.72759  | C                                                                 | -4.92913 | 0.80761  | -1.48406 | Si                                                                | -0.15772 | -0.06446 | -1.22592 |
| H                                                                 | -5.77275 | 1.98933  | 0.67037  | H                                                                 | -5.79155 | 1.45708  | -1.39683 | C                                                                 | 0.62536  | -1.48025 | 1.13837  |
| C                                                                 | -1.43866 | -2.03282 | -1.79524 | C                                                                 | -4.97591 | -0.26519 | -2.35604 | C                                                                 | -0.56742 | -1.99023 | 1.72190  |
| H                                                                 | -0.75098 | -1.80284 | -0.97689 | H                                                                 | -5.86818 | -0.45444 | -2.93852 | H                                                                 | -1.47949 | -2.19441 | 1.17810  |
| C                                                                 | -0.68559 | -1.86004 | -3.11341 | C                                                                 | -3.87250 | -1.08544 | -2.48983 | C                                                                 | -0.34799 | -2.12147 | 3.11530  |
| H                                                                 | -0.32020 | -0.83962 | -3.22227 | H                                                                 | -3.91067 | -1.91272 | -3.18832 | H                                                                 | -1.06924 | -2.46815 | 3.84050  |
| H                                                                 | -1.33240 | -2.07657 | -3.96545 | C                                                                 | -2.71664 | -0.87035 | -1.74515 | C                                                                 | 0.98505  | -1.72614 | 3.39241  |
| H                                                                 | 0.16299  | -2.54609 | -3.16917 | C                                                                 | -3.77886 | 2.27513  | 0.18715  | H                                                                 | 1.45617  | -1.71879 | 4.36391  |
| C                                                                 | -1.89040 | -3.48185 | -1.61589 | H                                                                 | -2.75640 | 2.43107  | 0.53452  | C                                                                 | 1.59066  | -1.33403 | 2.17442  |
| H                                                                 | -1.02787 | -4.15002 | -1.58245 | C                                                                 | -4.18593 | 3.55380  | -0.54462 | H                                                                 | 2.60151  | -0.97506 | 2.04823  |
| H                                                                 | -2.52216 | -3.81527 | -2.44039 | H                                                                 | -5.22758 | 3.53293  | -0.86859 | C                                                                 | 1.92166  | -1.79356 | -0.84293 |
| H                                                                 | -2.45937 | -3.62278 | -0.69626 | H                                                                 | -3.56601 | 3.71912  | -1.42583 | C                                                                 | 1.85902  | -3.16494 | -1.14656 |
| N                                                                 | -1.50532 | 0.22336  | 0.07685  | H                                                                 | -4.07112 | 4.41658  | 0.11344  | C                                                                 | 2.96090  | -3.77412 | -1.73214 |
| H                                                                 | 1.11075  | -0.48491 | -0.45958 | C                                                                 | -4.65818 | 2.03986  | 1.41571  | H                                                                 | 2.92714  | -4.83187 | -1.96281 |
| O                                                                 | 0.02030  | 1.40873  | -1.88776 | H                                                                 | -4.61175 | 2.89451  | 2.09296  | C                                                                 | 4.10277  | -3.05438 | -2.03479 |
| H                                                                 | -0.15857 | 2.98351  | -0.15970 | H                                                                 | -4.34189 | 1.15689  | 1.97098  | H                                                                 | 4.94822  | -3.54329 | -2.50097 |
| O                                                                 | 0.02908  | 3.77700  | -1.40090 | H                                                                 | -5.70284 | 1.89920  | 1.13092  | C                                                                 | 4.15684  | -1.70891 | -1.73266 |
| H                                                                 | -0.77700 | 4.27121  | -1.57059 | C                                                                 | -1.54965 | -1.81215 | -1.94013 | H                                                                 | 5.05597  | -1.15119 | -1.96523 |
| H                                                                 | 0.05267  | 2.49200  | -1.96322 | H                                                                 | -0.73449 | -1.46230 | -1.30711 | C                                                                 | 3.08634  | -1.06031 | -1.12207 |
| <b>TSS13</b> (C <sub>1</sub> ): E <sub>tot</sub> = -3055.59499167 |          |          |          | C                                                                 | -1.04627 | -1.78788 | -3.38158 | C                                                                 | 0.64156  | -4.00265 | -0.83012 |
| C                                                                 | 1.29194  | -0.80846 | 1.22916  | H                                                                 | -0.76617 | -0.77614 | -3.66795 | H                                                                 | -0.16677 | -3.32594 | -0.55964 |
| C                                                                 | 0.73734  | -2.11463 | 1.19193  | H                                                                 | -1.80180 | -2.15116 | -4.08018 | C                                                                 | 0.17012  | -4.81304 | -2.03800 |
| H                                                                 | 0.34433  | -2.61665 | 0.31852  | H                                                                 | -0.16915 | -2.42934 | -3.49079 | H                                                                 | 0.89130  | -5.57693 | -2.33166 |
| C                                                                 | 0.75473  | -2.62920 | 2.51133  | C                                                                 | -1.89405 | -3.23385 | -1.49739 | H                                                                 | -0.00186 | -4.17605 | -2.90681 |
| H                                                                 | 0.39273  | -3.60050 | 2.81233  | H                                                                 | -1.03091 | -3.89374 | -1.61000 | H                                                                 | -0.76225 | -5.33380 | -1.80911 |
| C                                                                 | 1.33690  | -1.65323 | 3.35324  | H                                                                 | -2.70356 | -3.65714 | -2.09408 | C                                                                 | 0.90819  | -4.91313 | 0.36919  |
| H                                                                 | 1.49781  | -1.74298 | 4.41686  | H                                                                 | -2.20571 | -3.26749 | -0.45262 | H                                                                 | 0.01378  | -5.48223 | 0.63035  |
| C                                                                 | 1.67099  | -0.52610 | 2.56602  | N                                                                 | -1.55438 | 0.42320  | -0.01141 | H                                                                 | 1.20231  | -4.33680 | 1.24592  |
| H                                                                 | 2.12799  | 0.37690  | 2.93059  | O                                                                 | 0.06803  | 1.18034  | -2.20495 | H                                                                 | 1.70473  | -5.62825 | 0.15382  |
| C                                                                 | 2.73622  | 0.62672  | -0.12914 | H                                                                 | 1.24301  | -0.54245 | -0.72983 | C                                                                 | 3.24849  | 0.40437  | -0.77538 |
| C                                                                 | 3.61438  | -0.06552 | -0.97991 | H                                                                 | 0.33843  | 2.46496  | -1.52628 | H                                                                 | 2.36666  | 0.72535  | -0.21762 |
| C                                                                 | 4.85387  | 0.49818  | -1.24847 | <b>TSS14</b> (C <sub>1</sub> ): E <sub>tot</sub> = -3035.84529028 |          |          |          | C                                                                 | 3.34486  | 1.26062  | -2.03637 |
| H                                                                 | 5.53946  | -0.00886 | -1.91377 | C                                                                 | -0.71615 | 1.26340  | 1.27934  | H                                                                 | 2.45176  | 1.15915  | -2.65421 |
| C                                                                 | 5.23119  | 1.69926  | -0.67890 | C                                                                 | 0.44356  | 1.71577  | 1.97251  | H                                                                 | 4.20294  | 0.97517  | -2.64724 |
| H                                                                 | 6.20068  | 2.12590  | -0.89918 | H                                                                 | 1.38085  | 2.00281  | 1.51853  | H                                                                 | 3.45991  | 2.31491  | -1.78116 |
| C                                                                 | 4.36612  | 2.34684  | 0.17691  | C                                                                 | 0.17181  | 1.67369  | 3.36187  | C                                                                 | 4.45467  | 0.64253  | 0.13400  |
| H                                                                 | 4.67404  | 3.28237  | 0.62605  | H                                                                 | 0.86038  | 1.94014  | 4.14980  | H                                                                 | 4.49386  | 1.68737  | 0.44697  |
| C                                                                 | 3.10484  | 1.83529  | 0.47606  | C                                                                 | -1.16162 | 1.22736  | 3.53535  | H                                                                 | 5.39710  | 0.41932  | -0.36817 |
| C                                                                 | 3.24826  | -1.37051 | -1.66539 | H                                                                 | -1.66692 | 1.09002  | 4.47966  | H                                                                 | 4.40978  | 0.02628  | 1.03226  |
| H                                                                 | 2.46410  | -1.87743 | -1.09395 | C                                                                 | -1.71276 | 0.97888  | 2.25724  | N                                                                 | 0.80857  | -1.14630 | -0.21825 |
| C                                                                 | 2.71797  | -1.09204 | -3.07444 | H                                                                 | -2.70434 | 0.60417  | 2.05543  | N                                                                 | -2.39758 | -2.54473 | -1.33291 |
| H                                                                 | 3.49946  | -0.64384 | -3.69045 | C                                                                 | -1.63225 | 2.17318  | -0.71528 | H                                                                 | -3.33744 | -2.27784 | -1.58685 |
| H                                                                 | 1.87201  | -0.40329 | -3.07002 | C                                                                 | -1.00561 | 3.38693  | -1.04888 | H                                                                 | -2.42796 | -3.51348 | -1.04632 |
| H                                                                 | 2.40259  | -2.01794 | -3.55860 | C                                                                 | -1.78223 | 4.43193  | -1.53704 | H                                                                 | -1.84628 | -2.50990 | -2.17934 |
| C                                                                 | 4.40300  | -2.37016 | -1.70045 | H                                                                 | -1.31150 | 5.37584  | -1.78291 | <b>TSS15</b> (C <sub>1</sub> ): E <sub>tot</sub> = -3035.78641554 |          |          |          |
| H                                                                 | 4.04620  | -3.32995 | -2.07507 | C                                                                 | -3.14382 | 4.29243  | -1.71997 | C                                                                 | 1.61144  | -1.23436 | 0.50975  |
| H                                                                 | 4.82473  | -2.53208 | -0.70870 | H                                                                 | -3.73225 | 5.11812  | -2.09819 | C                                                                 | 1.14861  | -2.53714 | 0.17285  |
| H                                                                 | 5.20761  | -2.05217 | -2.36409 | C                                                                 | -3.74365 | 3.08422  | -1.42806 | H                                                                 | 0.68437  | -2.82082 | -0.76258 |
| C                                                                 | 2.26089  | 2.63284  | 1.45346  | H                                                                 | -4.80859 | 2.97190  | -1.59186 | C                                                                 | 1.37413  | -3.38689 | 1.28539  |
| H                                                                 | 1.32179  | 2.10419  | 1.63034  | C                                                                 | -3.01144 | 2.01239  | -0.92643 | H                                                                 | 1.12248  | -4.43543 | 1.34099  |
| C                                                                 | 1.90553  | 4.01561  | 0.90667  | C                                                                 | 0.48232  | 3.62335  | -0.90765 | C                                                                 | 2.01216  | -2.26687 | 2.29413  |
| H                                                                 | 1.34290  | 3.93781  | -0.02008 | H                                                                 | 0.95808  | 2.68187  | -0.62890 | H                                                                 | 2.32947  | -2.99137 | 3.25953  |
| H                                                                 | 2.79798  | 4.61528  | 0.72197  | C                                                                 | 1.10206  | 4.05933  | -2.23548 | C                                                                 | 2.15458  | -1.29888 | 1.82267  |
| H                                                                 | 1.29019  | 4.55775  | 1.62709  | H                                                                 | 0.70316  | 5.01436  | -2.57988 | H                                                                 | 2.59828  | -0.47622 | 2.36150  |
| C                                                                 | 2.97654  | 2.79656  | 2.80059  | H                                                                 | 0.92154  | 3.32174  | -3.01739 | C                                                                 | 2.56595  | 0.76046  | -0.46374 |
| H                                                                 | 2.29155  | 3.20431  | 3.54526  | H                                                                 | 2.18107  | 4.18139  | -2.13194 | C                                                                 | 3.58937  | 0.32151  | -1.32426 |
| H                                                                 | 3.81542  | 3.48934  | 2.72228  | C                                                                 | 0.77675  | 4.64424  | 0.19217  | C                                                                 | 4.71087  | 1.12422  | -1.49416 |

|    |          |          |          |                                                            |          |          |          |                                                            |          |          |          |
|----|----------|----------|----------|------------------------------------------------------------|----------|----------|----------|------------------------------------------------------------|----------|----------|----------|
| H  | 5.51334  | 0.79189  | -2.14110 | TSS16 (C <sub>1</sub> ): E <sub>tot</sub> = -3035.81253805 | C        | -2.47718 | -2.28921 | -3.35712                                                   |          |          |          |
| C  | 4.81879  | 2.34939  | -0.86105 | C                                                          | 1.56385  | -0.94473 | 0.84412  | H                                                          | -1.89682 | -1.44278 | -3.72473 |
| H  | 5.69765  | 2.96328  | -1.00921 | C                                                          | 1.26558  | -2.33054 | 0.71807  | H                                                          | -3.39751 | -2.32438 | -3.94197 |
| C  | 3.79567  | 2.78675  | -0.04191 | H                                                          | 0.94240  | -2.83280 | -0.18266 | H                                                          | -1.92305 | -3.20598 | -3.57099 |
| H  | 3.88766  | 3.74758  | 0.45005  | C                                                          | 1.43924  | -2.93376 | 1.98873  | C                                                          | -3.63278 | -3.33973 | -1.39284 |
| C  | 2.66098  | 2.00970  | 0.17640  | H                                                          | 1.27715  | -3.97571 | 2.22090  | H                                                          | -3.10142 | -4.28347 | -1.52999 |
| C  | 3.51218  | -1.00464 | -2.05002 | C                                                          | 1.86875  | -1.93342 | 2.89341  | H                                                          | -4.56415 | -3.40870 | -1.95683 |
| H  | 2.48533  | -1.36720 | -1.99059 | H                                                          | 2.09158  | -2.07598 | 3.94009  | H                                                          | -3.90000 | -3.25019 | -0.34003 |
| C  | 3.83852  | -0.87244 | -3.53701 | C                                                          | 1.95119  | -0.70762 | 2.19039  | N                                                          | -1.50386 | -0.09939 | -0.18812 |
| H  | 4.87882  | -0.59473 | -3.71372 | H                                                          | 2.25717  | 0.24136  | 2.60197  | N                                                          | 0.43032  | -0.70887 | -2.25283 |
| H  | 3.20670  | -0.12524 | -4.01789 | C                                                          | 2.64488  | 0.88625  | -0.23473 | H                                                          | 1.32297  | -0.59751 | -1.31499 |
| H  | 3.67114  | -1.82461 | -4.04239 | C                                                          | 3.83211  | 0.40544  | -0.81573 | H                                                          | 0.67463  | -0.44289 | -3.19754 |
| C  | 4.41526  | -2.04087 | -1.37937 | C                                                          | 4.93798  | 1.24504  | -0.87092 | H                                                          | -0.07625 | -1.58492 | -2.27280 |
| H  | 4.32681  | -3.00845 | -1.87632 | H                                                          | 5.85942  | 0.88576  | -1.31228 | TSS17 (C <sub>1</sub> ): E <sub>tot</sub> = -3035.78585865 |          |          |          |
| H  | 4.15216  | -2.18038 | -0.33112 | C                                                          | 4.88734  | 2.53154  | -0.36911 | C                                                          | 1.19668  | 3.27831  | 2.57638  |
| H  | 5.46329  | -1.73754 | -1.42554 | H                                                          | 5.75549  | 3.17491  | -0.42657 | C                                                          | 0.41409  | 2.95343  | 1.43162  |
| C  | 1.60345  | 2.52335  | 1.13182  | C                                                          | 3.72288  | 2.98412  | 0.21793  | H                                                          | 0.65438  | 3.19437  | 0.40604  |
| H  | 0.74338  | 1.85745  | 1.06284  | H                                                          | 3.69304  | 3.98813  | 0.62329  | C                                                          | -0.72509 | 2.23589  | 1.87478  |
| C  | 1.12677  | 3.93369  | 0.78685  | C                                                          | 2.59132  | 2.17860  | 0.31124  | H                                                          | -1.50671 | 1.84267  | 1.24206  |
| H  | 0.73135  | 3.99759  | -0.22686 | C                                                          | 3.98604  | -1.01002 | -1.33853 | C                                                          | -0.66341 | 2.13702  | 3.28462  |
| H  | 1.92454  | 4.67225  | 0.87755  | H                                                          | 3.01334  | -1.49984 | -1.35948 | H                                                          | -1.38905 | 1.65354  | 3.92117  |
| H  | 0.32893  | 4.23805  | 1.46594  | C                                                          | 4.51558  | -1.04445 | -2.77152 | C                                                          | 0.52031  | 2.78185  | 3.72127  |
| C  | 2.10629  | 2.49347  | 2.57595  | H                                                          | 5.53238  | -0.65725 | -2.84794 | H                                                          | 0.85173  | 2.88753  | 4.74300  |
| H  | 1.32659  | 2.82655  | 3.26397  | H                                                          | 3.88787  | -0.45528 | -3.44080 | C                                                          | 2.63258  | 4.92370  | 3.57390  |
| H  | 2.96712  | 3.15073  | 2.71096  | H                                                          | 4.53364  | -2.07004 | -3.14340 | C                                                          | 3.46700  | 4.68651  | 4.67785  |
| H  | 2.40782  | 1.49268  | 2.87952  | C                                                          | 4.86655  | -1.83188 | -0.39627 | C                                                          | 3.57984  | 5.67574  | 5.64998  |
| Fe | 0.17290  | -1.79804 | 1.81274  | H                                                          | 4.94938  | -2.86207 | -0.74695 | H                                                          | 4.21042  | 5.50312  | 6.51369  |
| N  | 1.43151  | -0.06596 | -0.24953 | H                                                          | 4.44881  | -1.85382 | 0.61034  | C                                                          | 2.89719  | 6.87194  | 5.54640  |
| Si | -0.05965 | 0.04959  | -1.19756 | H                                                          | 5.87537  | -1.42006 | -0.33297 | H                                                          | 2.99549  | 7.62491  | 6.31733  |
| C  | -1.39119 | -0.67369 | 1.19839  | C                                                          | 1.38455  | 2.75048  | 1.02653  | C                                                          | 2.08978  | 7.10015  | 4.44744  |
| C  | -0.86731 | -0.14487 | 2.41123  | H                                                          | 0.60507  | 1.98715  | 1.06036  | H                                                          | 1.55871  | 8.04073  | 4.36848  |
| H  | -0.44227 | 0.83965  | 2.53841  | C                                                          | 0.81741  | 3.96253  | 0.29010  | C                                                          | 1.94614  | 6.14754  | 3.44698  |
| C  | -0.95584 | -1.14493 | 3.40985  | H                                                          | 0.52268  | 3.69957  | -0.72453 | C                                                          | 4.22586  | 3.39472  | 4.88533  |
| H  | -0.62795 | -1.04764 | 4.43412  | H                                                          | 1.54423  | 4.77509  | 0.23948  | H                                                          | 4.12661  | 2.78975  | 3.98423  |
| C  | -1.56322 | -2.28766 | 2.83342  | H                                                          | -0.06383 | 4.34494  | 0.80798  | C                                                          | 5.71548  | 3.64814  | 5.11433  |
| H  | -1.77571 | -3.21732 | 3.34000  | C                                                          | 1.70657  | 3.11700  | 2.47716  | H                                                          | 6.26578  | 2.70622  | 5.12876  |
| C  | -1.82899 | -2.00519 | 1.47496  | H                                                          | 0.80311  | 3.44799  | 2.99245  | H                                                          | 5.90320  | 4.14103  | 6.06946  |
| H  | -2.27443 | -2.68525 | 0.76582  | H                                                          | 2.43076  | 3.93049  | 2.53901  | H                                                          | 6.13473  | 4.27855  | 4.33185  |
| C  | -2.69107 | 0.31341  | -0.59879 | H                                                          | 2.11537  | 2.27488  | 3.03472  | C                                                          | 3.64889  | 2.58571  | 6.04788  |
| C  | -3.25046 | 1.55971  | -0.25824 | Fe                                                         | 0.04068  | -1.42881 | 2.06957  | H                                                          | 2.60198  | 2.33181  | 5.88475  |
| C  | -4.48505 | 1.91266  | -0.79019 | N                                                          | 1.50282  | 0.00973  | -0.20785 | H                                                          | 3.71285  | 3.13522  | 6.98857  |
| H  | -4.93550 | 2.85975  | -0.52004 | Si                                                         | -0.18811 | 0.72942  | -1.11372 | H                                                          | 4.19962  | 1.65110  | 6.17707  |
| C  | -5.15077 | 1.07591  | -1.66695 | C                                                          | -1.52672 | -0.58320 | 1.13537  | C                                                          | 1.03076  | 6.45955  | 2.27998  |
| H  | -6.10794 | 1.36836  | -2.07880 | C                                                          | -1.23059 | 0.14275  | 2.32670  | H                                                          | 1.17038  | 5.70474  | 1.50493  |
| C  | -4.58545 | -0.13502 | -2.01447 | H                                                          | -0.93884 | 1.18161  | 2.37978  | C                                                          | 1.35935  | 7.80423  | 1.63204  |
| H  | -5.11107 | -0.78303 | -2.70547 | C                                                          | -1.34112 | -0.73804 | 3.42936  | H                                                          | 2.40608  | 7.85549  | 1.33206  |
| C  | -3.36301 | -0.54472 | -1.48868 | H                                                          | -1.15847 | -0.48505 | 4.46325  | H                                                          | 1.16234  | 8.64539  | 2.29815  |
| C  | -2.56343 | 2.51012  | 0.69777  | C                                                          | -1.74191 | -2.00474 | 2.93902  | H                                                          | 0.74766  | 7.95069  | 0.74063  |
| H  | -1.52732 | 2.18457  | 0.80146  | H                                                          | -1.91434 | -2.88989 | 3.53315  | C                                                          | -0.43579 | 6.39701  | 2.70932  |
| C  | -2.53399 | 3.94601  | 0.17662  | C                                                          | -1.85867 | -1.91330 | 1.53302  | H                                                          | -1.09437 | 6.58965  | 1.86073  |
| H  | -3.53080 | 4.38054  | 0.09173  | H                                                          | -2.12650 | -2.72169 | 0.87037  | H                                                          | -0.65396 | 7.14321  | 3.47585  |
| H  | -2.06332 | 4.00800  | -0.80595 | C                                                          | -2.80148 | 0.14816  | -0.74678 | H                                                          | -0.68943 | 5.41699  | 3.11291  |
| H  | -1.96493 | 4.58381  | 0.85403  | C                                                          | -3.45882 | 1.37019  | -0.50750 | Fe                                                         | 1.00631  | 1.27288  | 2.42982  |
| C  | -3.21753 | 2.44668  | 2.07877  | C                                                          | -4.72210 | 1.57418  | -1.05204 | N                                                          | 2.44902  | 3.93750  | 2.56541  |
| H  | -2.68928 | 3.08629  | 2.78898  | H                                                          | -5.23864 | 2.50745  | -0.86349 | Si                                                         | 3.82868  | 3.28408  | 1.21375  |
| H  | -3.21224 | 1.43127  | 2.47375  | C                                                          | -5.33555 | 0.61148  | -1.82994 | C                                                          | 2.85751  | 0.68110  | 1.86807  |
| H  | -4.25523 | 2.78364  | 2.03762  | H                                                          | -6.31905 | 0.78982  | -2.24486 | C                                                          | 1.87632  | 0.02158  | 1.06882  |
| C  | -2.83764 | -1.90462 | -1.90013 | C                                                          | -4.68101 | -0.57964 | -2.07504 | H                                                          | 1.78048  | 0.09636  | -0.00354 |
| H  | -1.89889 | -2.08632 | -1.37416 | H                                                          | -5.16319 | -1.33054 | -2.68972 | C                                                          | 1.03873  | -0.72990 | 1.92283  |
| C  | -2.52695 | -1.96056 | -3.39533 | C                                                          | -3.42013 | -0.83192 | -1.54478 | H                                                          | 0.19500  | -1.32953 | 1.61497  |
| H  | -1.77733 | -1.21626 | -3.66086 | C                                                          | -2.86319 | 2.47756  | 0.33428  | C                                                          | 1.48898  | -0.54718 | 3.25427  |
| H  | -3.41803 | -1.78547 | -4.00090 | H                                                          | -1.83351 | 2.21240  | 0.57544  | H                                                          | 1.05188  | -0.98578 | 4.13904  |
| H  | -2.13347 | -2.94193 | -3.66674 | C                                                          | -2.80417 | 3.79837  | -0.43100 | C                                                          | 2.61550  | 0.30865  | 3.22127  |
| C  | -3.81555 | -3.01640 | -1.51224 | H                                                          | -3.79587 | 4.16555  | -0.69952 | H                                                          | 3.18173  | 0.64486  | 4.07716  |
| H  | -3.37368 | -3.99632 | -1.70100 | H                                                          | -2.22337 | 3.68951  | -1.34677 | C                                                          | 4.92572  | 0.84963  | 0.67442  |
| H  | -4.73918 | -2.96165 | -2.09065 | H                                                          | -2.32922 | 4.57001  | 0.17683  | C                                                          | 4.88522  | 0.78451  | -0.72981 |
| H  | -4.09284 | -2.96616 | -0.45897 | C                                                          | -3.62485 | 2.62960  | 1.65123  | C                                                          | 5.91429  | 0.12795  | -1.39945 |
| N  | -1.41653 | -0.03497 | -0.06134 | H                                                          | -3.15472 | 3.38586  | 2.28319  | H                                                          | 5.89975  | 0.08015  | -2.48161 |
| N  | 0.09195  | 1.78471  | -1.90901 | H                                                          | -3.64704 | 1.69212  | 2.20664  | C                                                          | 6.94995  | -0.47510 | -0.71459 |
| H  | -0.77833 | 2.26863  | -2.09995 | H                                                          | -4.65744 | 2.94040  | 1.48135  | H                                                          | 7.73362  | -0.99101 | -1.25392 |
| H  | 0.08037  | 0.68583  | -2.70735 | C                                                          | -2.77496 | -2.16329 | -1.86131 | C                                                          | 6.97754  | -0.41375 | 0.66617  |
| H  | 0.86579  | 2.43029  | -1.76350 | H                                                          | -1.83002 | -2.21037 | -1.31687 | H                                                          | 7.79099  | -0.89110 | 1.19870  |

|                                                                |          |          |          |                                                                |          |          |          |                                                                |          |          |          |
|----------------------------------------------------------------|----------|----------|----------|----------------------------------------------------------------|----------|----------|----------|----------------------------------------------------------------|----------|----------|----------|
| C                                                              | 5.98773  | 0.25317  | 1.37755  | H                                                              | -1.10399 | 0.64889  | 4.60569  | H                                                              | 1.38069  | 4.76297  | -0.21062 |
| C                                                              | 3.78049  | 1.39747  | -1.56778 | C                                                              | -2.06270 | -0.87646 | 3.29100  | H                                                              | -0.29558 | 4.32999  | 0.08578  |
| H                                                              | 3.00634  | 1.78470  | -0.90254 | H                                                              | -2.35326 | -1.65147 | 3.98451  | C                                                              | 1.15782  | 3.30721  | 2.15492  |
| C                                                              | 4.29953  | 2.58158  | -2.38362 | C                                                              | -2.26538 | -0.90233 | 1.88821  | H                                                              | 0.17798  | 3.68508  | 2.45359  |
| H                                                              | 5.06911  | 2.27223  | -3.09313 | H                                                              | -2.74914 | -1.68723 | 1.32537  | H                                                              | 1.87092  | 4.12313  | 2.28016  |
| H                                                              | 4.72872  | 3.34815  | -1.73800 | C                                                              | -2.91691 | 0.22969  | -0.75900 | H                                                              | 1.43228  | 2.51869  | 2.85456  |
| H                                                              | 3.48958  | 3.04287  | -2.95114 | C                                                              | -4.15540 | 0.87183  | -0.59176 | Fe                                                             | -0.06303 | -1.20050 | 2.23046  |
| C                                                              | 3.11970  | 0.36267  | -2.48048 | C                                                              | -5.23736 | 0.43034  | -1.34243 | N                                                              | 1.53984  | -0.04991 | -0.13426 |
| H                                                              | 2.25442  | 0.79774  | -2.98335 | H                                                              | -6.20290 | 0.90585  | -1.21971 | Si                                                             | -0.10260 | 0.12171  | -1.16414 |
| H                                                              | 2.78332  | -0.51196 | -1.92292 | C                                                              | -5.10257 | -0.60048 | -2.25663 | C                                                              | -1.60437 | -0.41948 | 1.18869  |
| H                                                              | 3.79938  | 0.00907  | -3.25722 | H                                                              | -5.95440 | -0.92347 | -2.84070 | C                                                              | -1.37258 | 0.35414  | 2.36353  |
| C                                                              | 6.07879  | 0.28726  | 2.88720  | C                                                              | -3.87565 | -1.21360 | -2.42127 | H                                                              | -1.10694 | 1.40080  | 2.38861  |
| H                                                              | 5.34357  | 1.00768  | 3.24975  | H                                                              | -3.77738 | -2.01794 | -3.14047 | C                                                              | -1.52548 | -0.48945 | 3.48912  |
| C                                                              | 7.45134  | 0.75100  | 3.37493  | C                                                              | -2.76852 | -0.82178 | -1.67308 | H                                                              | -1.39966 | -0.19877 | 4.52158  |
| H                                                              | 7.72408  | 1.72197  | 2.95827  | C                                                              | -4.34416 | 2.01446  | 0.38238  | C                                                              | -1.87486 | -1.78165 | 3.02394  |
| H                                                              | 8.24279  | 0.04953  | 3.10823  | H                                                              | -3.36541 | 2.31065  | 0.76093  | H                                                              | -2.05585 | -2.64981 | 3.64027  |
| H                                                              | 7.45935  | 0.84019  | 4.46244  | C                                                              | -4.94811 | 3.24401  | -0.29488 | C                                                              | -1.92598 | -1.74208 | 1.61197  |
| C                                                              | 5.73093  | -1.07799 | 3.48206  | H                                                              | -5.96478 | 3.06475  | -0.64811 | H                                                              | -2.13864 | -2.57682 | 0.96251  |
| H                                                              | 5.72417  | -1.03637 | 4.57334  | H                                                              | -4.34973 | 3.55857  | -1.15060 | C                                                              | -2.79283 | 0.26071  | -0.79272 |
| H                                                              | 6.46165  | -1.83281 | 3.18501  | H                                                              | -4.99282 | 4.07834  | 0.40664  | C                                                              | -3.46003 | 1.49024  | -0.63715 |
| H                                                              | 4.74978  | -1.41715 | 3.15217  | C                                                              | -5.17767 | 1.57208  | 1.58519  | C                                                              | -4.69769 | 1.66820  | -1.24415 |
| N                                                              | 3.89422  | 1.52089  | 1.40770  | H                                                              | -5.28283 | 2.38889  | 2.30104  | H                                                              | -5.22642 | 2.60441  | -1.11569 |
| H                                                              | 2.61401  | 4.34452  | 1.28762  | H                                                              | -4.70802 | 0.73494  | 2.10170  | C                                                              | -5.27044 | 0.67384  | -2.01358 |
| N                                                              | 5.38235  | 3.81834  | 1.69045  | H                                                              | -6.18066 | 1.26349  | 1.28402  | H                                                              | -6.23288 | 0.83232  | -2.48245 |
| H                                                              | 5.77691  | 4.67010  | 1.33307  | C                                                              | -1.45811 | -1.55210 | -1.86664 | C                                                              | -4.60271 | -0.52212 | -2.17994 |
| H                                                              | 6.03144  | 3.28362  | 2.24434  | H                                                              | -0.75239 | -1.15666 | -1.13408 | H                                                              | -5.05350 | -1.29800 | -1.29800 |
| <b>TSS18 (C<sub>1</sub>): E<sub>tot</sub> = -3035.72935412</b> |          |          |          | C                                                              | -0.87756 | -1.31353 | -3.26019 | C                                                              | -3.37011 | -0.75669 | -1.57659 |
| C                                                              | 1.44833  | -0.80191 | 1.13738  | H                                                              | -0.68538 | -0.25493 | -3.43651 | C                                                              | -2.90355 | 2.62390  | 0.19400  |
| C                                                              | 0.80429  | -2.06596 | 1.13227  | H                                                              | -1.55374 | -1.66370 | -4.04182 | H                                                              | -1.86303 | 2.39004  | 0.42410  |
| H                                                              | 0.42855  | -2.58472 | 0.26183  | H                                                              | 0.06642  | -1.84792 | -3.38343 | C                                                              | -2.91542 | 3.95028  | -0.56529 |
| C                                                              | 0.74295  | -2.53707 | 2.46967  | C                                                              | -1.60509 | -3.04732 | -1.58536 | H                                                              | -3.92735 | 4.27759  | -0.80703 |
| H                                                              | 0.31420  | -3.47519 | 2.78929  | H                                                              | -0.64170 | -3.55310 | -1.67873 | H                                                              | -2.35537 | 3.88090  | -1.49772 |
| C                                                              | 1.35339  | -1.56795 | 3.29819  | H                                                              | -2.28836 | -3.52995 | -2.28555 | H                                                              | -2.46632 | 4.74018  | 0.03911  |
| H                                                              | 1.46964  | -1.62744 | 4.37005  | H                                                              | -1.98186 | -3.22703 | -0.57797 | C                                                              | -3.66973 | 2.75261  | 1.51182  |
| C                                                              | 1.77316  | -0.48863 | 2.48116  | N                                                              | -1.80100 | 0.68476  | -0.00029 | H                                                              | -3.22071 | 3.51740  | 2.14939  |
| H                                                              | 2.27430  | 0.40427  | 2.82036  | N                                                              | -0.99243 | 2.26542  | -2.28133 | H                                                              | -3.67782 | 1.81411  | 2.06498  |
| C                                                              | 3.08958  | 0.42976  | -0.12842 | H                                                              | 1.39517  | -0.43946 | -0.82952 | H                                                              | -4.70769 | 3.04095  | 1.33462  |
| C                                                              | 4.01917  | -0.41258 | -0.76336 | H                                                              | -1.00425 | 3.32568  | -1.03268 | C                                                              | -2.73397 | -2.11317 | -1.80091 |
| C                                                              | 5.32802  | 0.02753  | -0.90539 | H                                                              | -1.73614 | 1.91707  | -2.88977 | H                                                              | -1.78161 | -2.15187 | -1.27184 |
| H                                                              | 6.05855  | -0.60051 | -1.39779 | <b>TSS19 (C<sub>1</sub>): E<sub>tot</sub> = -3035.81378984</b> |          |          |          | C                                                              | -2.42566 | -2.34027 | -3.28178 |
| C                                                              | 5.72304  | 1.25895  | -0.41148 | C                                                              | 1.52921  | -0.85929 | 1.05195  | H                                                              | -1.81931 | -1.53299 | -3.69166 |
| H                                                              | 6.74942  | 1.58377  | -0.52172 | C                                                              | 1.24209  | -2.25040 | 1.06492  | H                                                              | -3.33588 | -2.40196 | -3.88064 |
| C                                                              | 4.80180  | 2.07112  | 0.21797  | H                                                              | 0.96621  | -2.83391 | 0.19874  | H                                                              | -1.87939 | -3.27507 | -3.41917 |
| H                                                              | 5.11721  | 3.03755  | 0.59154  | C                                                              | 1.34516  | -2.69005 | 2.40617  | C                                                              | -3.62430 | -3.23898 | -1.26945 |
| C                                                              | 3.47267  | 1.68108  | 0.36546  | H                                                              | 1.17032  | -3.69715 | 2.75404  | H                                                              | -3.10713 | -4.19805 | -1.33456 |
| C                                                              | 3.59955  | -1.74974 | -1.34030 | C                                                              | 1.71459  | -1.58351 | 3.20947  | H                                                              | -4.54765 | -3.32966 | -1.84409 |
| H                                                              | 2.77539  | -2.14077 | -0.73930 | H                                                              | 1.87410  | -1.59698 | 4.27712  | H                                                              | -3.90896 | -3.07668 | -0.22971 |
| C                                                              | 3.10636  | -1.56959 | -2.77917 | C                                                              | 1.83826  | -0.44854 | 2.37238  | N                                                              | -1.53240 | 0.04741  | -0.14036 |
| H                                                              | 3.91664  | -1.22021 | -3.42097 | H                                                              | 2.12749  | 0.54341  | 2.68162  | N                                                              | 0.54829  | -1.14224 | -2.00368 |
| H                                                              | 2.30324  | -0.83403 | -2.85724 | C                                                              | 2.62257  | 0.91117  | -0.16007 | H                                                              | 1.60339  | -0.77177 | -1.02331 |
| H                                                              | 2.73657  | -2.51131 | -3.18958 | C                                                              | 3.88008  | 0.44711  | -0.58230 | H                                                              | -0.14242 | 1.49441  | -1.73033 |
| C                                                              | 4.69461  | -2.81133 | -1.28479 | C                                                              | 4.93834  | 1.34588  | -0.60162 | H                                                              | 0.25092  | -1.60151 | -2.84523 |
| H                                                              | 4.28998  | -3.77836 | -1.58565 | H                                                              | 5.91197  | 1.01593  | -0.93944 | <b>TSS26 (C<sub>1</sub>): E<sub>tot</sub> = -3005.98119875</b> |          |          |          |
| H                                                              | 5.09726  | -2.91656 | -0.27766 | C                                                              | 4.77503  | 2.65676  | -0.19323 | C                                                              | 1.43016  | -0.72275 | -1.18326 |
| H                                                              | 5.52281  | -2.59082 | -1.95973 | H                                                              | 5.61356  | 3.34042  | -0.20913 | C                                                              | 1.03173  | -0.12705 | -2.41314 |
| C                                                              | 2.49741  | 2.65171  | 0.99375  | C                                                              | 3.53620  | 3.08738  | 0.23349  | H                                                              | 0.69348  | 0.89122  | -2.54078 |
| H                                                              | 1.54172  | 2.14065  | 1.12317  | H                                                              | 3.41602  | 4.11526  | 0.55217  | C                                                              | 1.11251  | -1.11021 | -3.42802 |
| C                                                              | 2.26270  | 3.83719  | 0.05699  | C                                                              | 2.43643  | 2.23246  | 0.25761  | H                                                              | 0.85989  | -0.96892 | -4.46829 |
| H                                                              | 1.92616  | 3.50858  | -0.92577 | C                                                              | 4.12411  | -0.97209 | -1.06076 | C                                                              | 1.59409  | -2.30706 | -2.84244 |
| H                                                              | 3.17577  | 4.42027  | -0.07971 | H                                                              | 3.31444  | -1.61936 | -0.72146 | H                                                              | 1.76956  | -2.33939 | -3.35805 |
| H                                                              | 1.49826  | 4.50280  | 0.46147  | C                                                              | 4.13171  | -1.01757 | -2.58965 | C                                                              | 1.78995  | -2.07468 | -1.46238 |
| C                                                              | 2.95535  | 3.14196  | 2.36731  | H                                                              | 4.92585  | -0.39007 | -2.99836 | H                                                              | 2.13219  | -2.80072 | -0.74180 |
| H                                                              | 2.18175  | 3.76066  | 2.82474  | H                                                              | 3.17951  | -0.67568 | -2.99444 | C                                                              | 2.70871  | 0.20350  | 0.65757  |
| H                                                              | 3.85833  | 3.75135  | 2.30509  | H                                                              | 4.29583  | -2.03763 | -2.94073 | C                                                              | 3.32308  | 1.42684  | 0.34165  |
| H                                                              | 3.16862  | 2.31827  | 3.04931  | C                                                              | 5.40126  | -1.57430 | -0.47715 | C                                                              | 4.57330  | 1.70509  | 0.88031  |
| Fe                                                             | -0.25925 | -0.76016 | 2.31844  | H                                                              | 5.47047  | -2.62768 | -0.75061 | H                                                              | 5.06795  | 2.63640  | 0.63344  |
| N                                                              | 1.72835  | 0.00227  | 0.01518  | H                                                              | 5.40981  | -1.51023 | 0.61091  | C                                                              | 5.19744  | 0.81632  | 1.73597  |
| Si                                                             | -0.68971 | 1.83565  | -0.71060 | H                                                              | 6.30331  | -1.08862 | -0.85169 | H                                                              | 6.16962  | 1.05097  | 2.14948  |
| C                                                              | -1.75205 | 0.30663  | 1.34831  | C                                                              | 1.11159  | 2.80680  | 0.71073  | C                                                              | 4.56904  | -0.36779 | 2.06805  |
| C                                                              | -1.21361 | 1.06630  | 2.41877  | H                                                              | 0.35081  | 2.02576  | 0.67083  | H                                                              | 5.05801  | -1.05180 | 2.75112  |
| H                                                              | -0.75149 | 2.04026  | 2.33656  | C                                                              | 0.67128  | 3.93437  | -0.22219 | C                                                              | 3.32442  | -0.69827 | 1.54045  |
| C                                                              | -1.40209 | 0.33076  | 3.61776  | H                                                              | 0.57954  | 3.58799  | -1.25061 | C                                                              | 2.67790  | 2.44668  | -0.57015 |

|                                                                |          |          |          |   |          |          |          |                                                                |          |          |          |
|----------------------------------------------------------------|----------|----------|----------|---|----------|----------|----------|----------------------------------------------------------------|----------|----------|----------|
| H                                                              | 1.64041  | 2.14933  | -0.73278 | H | 2.59444  | -3.32622 | -2.71488 | Fe                                                             | 0.30109  | -2.11986 | -1.51034 |
| C                                                              | 2.64724  | 3.83787  | 0.06118  | C | 2.22650  | -1.44234 | -1.58814 | N                                                              | 1.38255  | 0.05171  | 0.25480  |
| H                                                              | 3.64744  | 4.25043  | 0.20059  | H | 2.61294  | -0.68103 | -2.24821 | N                                                              | -1.47139 | -0.18818 | -0.02200 |
| H                                                              | 2.15643  | 3.82066  | 1.03472  | C | -1.36028 | -1.05334 | -1.13646 | H                                                              | -0.03496 | 3.30984  | 3.36109  |
| H                                                              | 2.10018  | 4.53316  | -0.57708 | C | -1.68017 | -2.44439 | -1.15777 | H                                                              | 1.59754  | 2.91761  | 2.24539  |
| C                                                              | 3.37296  | 2.47559  | -1.93170 | H | -2.08149 | -3.01605 | -0.33548 | H                                                              | 0.82182  | 1.49366  | 3.43323  |
| H                                                              | 2.87182  | 3.17104  | -2.60806 | C | -1.35739 | -2.95104 | -2.43622 | Si                                                             | -0.14828 | 0.24685  | 1.03453  |
| H                                                              | 3.37308  | 1.49127  | -2.39947 | H | -1.47536 | -3.97452 | -2.75933 | H                                                              | -0.24345 | -0.48386 | 2.31298  |
| H                                                              | 4.41144  | 2.79852  | -1.83694 | C | -0.83749 | -1.88740 | -3.21457 | B                                                              | 0.59836  | 2.47586  | 2.75579  |
| C                                                              | 2.69966  | -2.01403 | 1.95402  | H | -0.49278 | -1.95708 | -4.23545 | N                                                              | -0.39960 | 1.96720  | 1.50839  |
| H                                                              | 1.74743  | -2.12194 | 1.43115  | C | -0.85777 | -0.71348 | -2.42412 | <b>TSS21 (C<sub>1</sub>): E<sub>tot</sub> = -3062.39957172</b> |          |          |          |
| C                                                              | 2.40312  | -2.04248 | 3.45417  | H | -0.51301 | 0.26360  | -2.73052 | C                                                              | 1.61151  | -0.85278 | 1.10966  |
| H                                                              | 1.76483  | -1.21099 | 3.75026  | C | 2.49450  | 0.95022  | 0.27628  | C                                                              | 1.16033  | -2.17883 | 1.34240  |
| H                                                              | 3.31904  | -1.98600 | 4.04481  | C | 3.55319  | 0.69412  | 1.15980  | H                                                              | 0.69610  | -2.82149 | 0.60698  |
| H                                                              | 1.89465  | -2.96894 | 3.72683  | C | 4.67970  | 1.50311  | 1.09443  | C                                                              | 1.38065  | -2.48361 | 2.70976  |
| C                                                              | 3.58570  | -3.20060 | 1.56840  | H | 5.51090  | 1.31500  | 1.76248  | H                                                              | 1.13253  | -3.41431 | 3.19814  |
| H                                                              | 3.07051  | -4.14314 | 1.76171  | C | 4.75571  | 2.55635  | 0.20174  | C                                                              | 1.99385  | -1.36112 | 3.31822  |
| H                                                              | 4.51124  | -3.21412 | 2.14611  | H | 5.64076  | 3.17798  | 0.16750  | H                                                              | 2.29503  | -1.28472 | 4.35225  |
| H                                                              | 3.86620  | -3.17599 | 0.51535  | C | 3.68933  | 2.82079  | -0.63471 | C                                                              | 2.13205  | -0.35069 | 2.33598  |
| Fe                                                             | -0.15958 | -1.70797 | -1.91808 | H | 3.74938  | 3.65923  | -1.31813 | H                                                              | 2.55863  | 0.63086  | 2.48135  |
| N                                                              | 1.43344  | -0.10457 | 0.08663  | C | 2.54478  | 2.03003  | -0.61448 | C                                                              | 2.67998  | 0.51726  | -0.54659 |
| Si                                                             | 0.03307  | 0.33657  | 1.01604  | C | 3.51099  | -0.42547 | 2.17637  | C                                                              | 3.69677  | -0.27143 | -1.11252 |
| C                                                              | -1.61615 | -1.10050 | -0.66978 | H | 2.49688  | -0.82549 | 2.20591  | C                                                              | 4.86779  | 0.34795  | -1.53272 |
| C                                                              | -1.26743 | -2.44569 | -0.37241 | C | 4.45214  | -1.56281 | 1.77758  | H                                                              | 5.66541  | -0.24883 | -1.95789 |
| H                                                              | -0.86885 | -2.80157 | 0.56802  | H | 4.21014  | -1.95830 | 0.79091  | C                                                              | 5.03158  | 1.71783  | -1.43055 |
| C                                                              | -1.49901 | -3.22353 | -1.53411 | H | 4.38718  | -2.38469 | 2.49277  | H                                                              | 5.94735  | 2.18397  | -1.77045 |
| H                                                              | -1.32009 | -4.28392 | -1.63155 | H | 5.49031  | -1.22536 | 1.75687  | C                                                              | 4.01778  | 2.48671  | -0.89166 |
| C                                                              | -2.02249 | -2.37121 | -2.53707 | C | 3.81600  | 0.08200  | 3.58535  | H                                                              | 4.15105  | 3.55947  | -0.81360 |
| H                                                              | -2.30993 | -2.66778 | -3.53455 | H | 4.84424  | 0.43370  | 3.68435  | C                                                              | 2.83917  | 1.90701  | -0.43252 |
| C                                                              | -2.09246 | -1.05970 | -2.00960 | H | 3.68058  | -0.72231 | 4.31037  | C                                                              | 3.55962  | -1.77234 | -1.25077 |
| H                                                              | -2.44133 | -0.17834 | -2.52705 | H | 3.14825  | 0.89895  | 3.85609  | H                                                              | 2.50840  | -2.02917 | -1.11224 |
| C                                                              | -2.59774 | 0.81843  | 0.41665  | C | 1.40431  | 2.39548  | -1.53981 | C                                                              | 3.95213  | -2.26915 | -2.64139 |
| C                                                              | -3.57407 | 0.35931  | 1.31301  | H | 0.56095  | 1.73664  | -1.32070 | H                                                              | 5.01618  | -2.13868 | -0.54657 |
| C                                                              | -4.70601 | 1.13954  | 1.51764  | C | 0.95207  | 3.84046  | -1.31499 | H                                                              | 3.39359  | -1.75035 | -3.42033 |
| H                                                              | -5.47701 | 0.79627  | 2.19641  | H | 0.79090  | 4.06510  | -0.25875 | H                                                              | 3.73740  | -3.33505 | -2.73198 |
| C                                                              | -4.86121 | 2.35656  | 0.87921  | H | 0.02926  | 4.04741  | -1.85858 | C                                                              | 4.37021  | -2.48973 | -0.16983 |
| H                                                              | -5.74522 | 2.95479  | 1.05754  | H | 1.69876  | 4.55271  | -1.66819 | H                                                              | 4.22829  | -3.57014 | -0.23368 |
| C                                                              | -3.88017 | 2.80800  | 0.01648  | C | 1.76011  | 2.18115  | -3.01055 | H                                                              | 4.07377  | -2.17379 | 0.82983  |
| H                                                              | -4.00609 | 3.76592  | -0.47375 | H | 2.61219  | 2.79442  | -3.30752 | H                                                              | 5.43748  | -2.28745 | -0.28290 |
| C                                                              | -2.74189 | 2.05017  | -0.23757 | H | 0.92076  | 2.45069  | -3.65513 | C                                                              | 1.78117  | 2.80058  | 0.17455  |
| C                                                              | -3.43783 | -0.95773 | 2.04510  | H | 2.01441  | 1.14200  | -3.21647 | H                                                              | 0.96904  | 2.16433  | 0.52862  |
| H                                                              | -2.41533 | -1.31491 | 1.91771  | C | -2.79023 | 0.18434  | 0.39109  | C                                                              | 1.20303  | 3.75769  | -0.86569 |
| C                                                              | -3.66157 | -0.80587 | 3.54896  | C | -3.44992 | -0.52298 | 1.41230  | H                                                              | 0.76892  | 3.20519  | -1.69992 |
| H                                                              | -4.68734 | -0.52294 | 3.79000  | C | -4.71516 | -0.09705 | 1.80876  | H                                                              | 1.96676  | 4.42754  | -1.26485 |
| H                                                              | -2.99882 | -0.05128 | 3.97320  | H | -5.23136 | -0.62728 | 2.59961  | H                                                              | 0.41764  | 4.37761  | -0.42903 |
| H                                                              | -3.46148 | -1.75067 | 4.05659  | C | -5.33256 | 0.98136  | 1.20835  | C                                                              | 2.30922  | 3.56933  | 1.38561  |
| C                                                              | -4.37439 | -2.00810 | 1.44726  | H | -6.31958 | 1.29038  | 1.52631  | H                                                              | 1.50825  | 4.14461  | 1.85379  |
| H                                                              | -4.24538 | -2.97006 | 1.94652  | C | -4.68183 | 1.66423  | 0.19721  | H                                                              | 3.09717  | 4.27253  | 1.11124  |
| H                                                              | -4.18006 | -2.15457 | 0.38479  | H | -5.17559 | 2.50555  | -0.27241 | H                                                              | 2.71969  | 2.89672  | 2.13883  |
| H                                                              | -5.41984 | -1.71403 | 1.55934  | C | -3.40933 | 1.29264  | -0.21904 | Fe                                                             | 0.15608  | -0.84244 | 2.51194  |
| C                                                              | -1.70090 | 2.58995  | -1.19306 | C | -2.87126 | -1.74273 | 2.09962  | N                                                              | 1.49263  | -0.11318 | -0.07769 |
| H                                                              | -0.94775 | 1.81464  | -1.34347 | H | -1.89800 | -1.96228 | 1.65856  | Si                                                             | 0.01760  | 0.00183  | -1.02753 |
| C                                                              | -0.99850 | 3.81361  | -0.60567 | C | -3.76055 | -2.96965 | 1.88369  | C                                                              | -1.42177 | -0.17646 | 1.44991  |
| H                                                              | -0.53523 | 3.58498  | 0.35492  | H | -4.72211 | -2.86434 | 2.38808  | C                                                              | -0.95586 | 0.86041  | 2.30958  |
| H                                                              | -1.69701 | 4.63689  | -0.44666 | H | -3.28084 | -3.86388 | 2.28497  | H                                                              | -0.57378 | 1.81852  | 1.98769  |
| H                                                              | -0.21459 | 4.17010  | -1.27649 | H | -3.96798 | -3.14023 | 0.82705  | C                                                              | -1.03349 | 0.40693  | 3.64800  |
| C                                                              | -2.29172 | 2.91336  | -2.56505 | C | -2.65490 | -1.49873 | 3.59381  | H                                                              | -0.73781 | 0.96377  | 4.52466  |
| H                                                              | -1.50427 | 3.21075  | -3.25969 | H | -2.01648 | -0.63450 | 3.77616  | C                                                              | -1.58221 | -0.89833 | 3.63462  |
| H                                                              | -3.00837 | 3.73462  | -2.51810 | H | -2.18058 | -2.36463 | 4.05825  | H                                                              | -1.77384 | -1.51548 | 4.49982  |
| H                                                              | -2.80860 | 2.05437  | -2.99372 | H | -3.59905 | -1.32670 | 4.11306  | C                                                              | -1.81788 | -1.26381 | 2.28911  |
| N                                                              | -1.44323 | 0.01656  | 0.16800  | C | -2.75389 | 2.06951  | -1.33977 | H                                                              | -2.20331 | -2.21527 | 1.96176  |
| B                                                              | 0.07317  | 1.60404  | 2.45517  | H | -1.69735 | 1.79703  | -1.36680 | C                                                              | -2.62259 | -0.04505 | -0.68945 |
| H                                                              | -0.95260 | 1.81967  | 3.02329  | C | -3.36567 | 1.68018  | -2.68658 | C                                                              | -3.10859 | 1.22627  | -1.06253 |
| H                                                              | 1.10844  | 1.86860  | 2.98167  | H | -3.29530 | 0.60716  | -2.86079 | C                                                              | -4.23586 | 1.30720  | -1.87293 |
| H                                                              | 0.06770  | -0.42445 | 2.38650  | H | -2.85430 | 2.18879  | -3.50614 | H                                                              | -4.62559 | 2.27657  | -2.15716 |
| <b>TSS20 (C<sub>1</sub>): E<sub>tot</sub> = -3062.36583546</b> |          |          |          | H | -4.42050 | 1.95744  | -2.73127 | C                                                              | -4.88462 | 0.16661  | -2.31472 |
| C                                                              | 1.64453  | -1.21379 | -0.31170 | C | -2.82919 | 3.58148  | -1.12990 | H                                                              | -5.76152 | 0.24843  | -2.94405 |
| C                                                              | 1.29762  | -2.47839 | 0.23935  | H | -3.85305 | 3.95480  | -1.16726 | C                                                              | -4.41425 | -1.07433 | -1.93413 |
| H                                                              | 0.84437  | -2.64913 | 1.20643  | H | -2.27584 | 4.10024  | -1.91361 | H                                                              | -4.93416 | -1.96266 | -2.27179 |
| C                                                              | 1.63043  | -3.47556 | -0.71152 | H | -2.40734 | 3.88421  | -0.17021 | C                                                              | -3.28854 | -1.20565 | -1.12413 |
| H                                                              | 1.47951  | -4.53787 | -0.59145 | H | -0.31391 | 2.61492  | 0.73052  | C                                                              | -2.47257 | 2.50173  | -0.55540 |
| C                                                              | 2.22041  | -2.83704 | -1.82820 | H | -1.35434 | 2.06854  | 1.84629  | H                                                              | -1.44892 | 2.27267  | -0.25281 |



|                                                                |          |          |          |                                                                |          |          |          |                                                                |          |          |          |
|----------------------------------------------------------------|----------|----------|----------|----------------------------------------------------------------|----------|----------|----------|----------------------------------------------------------------|----------|----------|----------|
| C                                                              | -2.38722 | 3.59526  | -1.61704 | H                                                              | 8.34657  | 15.01903 | 3.95634  | H                                                              | 0.84645  | 3.07139  | 6.15994  |
| H                                                              | -3.36827 | 3.96311  | -1.92078 | H                                                              | 8.59587  | 16.74817 | 4.15295  | C                                                              | 3.02906  | 6.49163  | 0.54909  |
| H                                                              | -1.86814 | 3.24612  | -2.51132 | H                                                              | 7.87846  | 16.11521 | 2.67015  | H                                                              | 3.35602  | 5.48371  | 0.29189  |
| H                                                              | -1.83350 | 4.45189  | -1.23222 | C                                                              | 3.17260  | 19.83478 | 6.14700  | C                                                              | 4.18157  | 7.42406  | 0.17701  |
| C                                                              | -3.22656 | 3.00440  | 0.67769  | C                                                              | 1.91507  | 20.46276 | 6.18957  | H                                                              | 5.07210  | 7.20326  | 0.76611  |
| H                                                              | -2.74314 | 3.89063  | 1.09396  | C                                                              | 1.44359  | 20.94095 | 7.40859  | H                                                              | 3.93310  | 8.47563  | 0.32958  |
| H                                                              | -3.26395 | 2.24542  | 1.45826  | H                                                              | 0.47237  | 21.41882 | 7.45339  | H                                                              | 4.43883  | 7.30292  | -0.87656 |
| H                                                              | -4.25386 | 3.27339  | 0.42392  | C                                                              | 2.19092  | 20.82692 | 8.56338  | C                                                              | 1.78112  | 6.79883  | -0.27929 |
| C                                                              | -2.87346 | -2.59723 | -0.69803 | H                                                              | 1.81101  | 21.21355 | 9.50008  | H                                                              | 1.99886  | 6.72682  | -1.34646 |
| H                                                              | -1.92054 | -2.51528 | -0.17208 | C                                                              | 3.42920  | 20.21534 | 8.51291  | H                                                              | 1.41412  | 7.80839  | -0.08287 |
| C                                                              | -2.66090 | -3.55206 | -1.87157 | H                                                              | 4.01318  | 20.13411 | 9.42117  | H                                                              | 0.97565  | 6.09957  | -0.05592 |
| H                                                              | -1.92179 | -3.16940 | -2.57197 | C                                                              | 3.93379  | 19.70334 | 7.32307  | Fe                                                             | 1.07623  | 1.81408  | 1.39609  |
| H                                                              | -3.58503 | -3.73582 | -2.42266 | C                                                              | 1.03521  | 20.66115 | 4.97228  | N                                                              | 2.80931  | 4.10357  | 2.20137  |
| H                                                              | -2.30835 | -4.51858 | -1.50767 | H                                                              | 1.55544  | 20.26981 | 4.09870  | Si                                                             | 4.42760  | 3.35034  | 1.91758  |
| C                                                              | -3.92003 | -3.17991 | 0.25762  | C                                                              | 0.76380  | 22.14544 | 4.17962  | C                                                              | 2.61566  | 0.87629  | 2.31288  |
| H                                                              | -3.57322 | -4.12313 | 0.68467  | H                                                              | 0.15604  | 22.58675 | 5.51099  | C                                                              | 2.12828  | 0.07140  | 1.23955  |
| H                                                              | -4.85545 | -3.38466 | -0.26668 | H                                                              | 0.22108  | 22.28056 | 3.78218  | H                                                              | 2.69268  | -0.24335 | 0.37586  |
| H                                                              | -4.15313 | -2.49928 | 1.07591  | H                                                              | 1.68878  | 22.71989 | 4.66283  | C                                                              | 0.77116  | -0.23419 | 1.49728  |
| N                                                              | -1.40351 | -0.14454 | 0.04142  | C                                                              | -0.27613 | 19.88509 | 5.09425  | H                                                              | 0.12588  | -0.82546 | 0.86490  |
| B                                                              | -0.03915 | -0.86246 | -2.98283 | H                                                              | -0.09697 | 18.82044 | 5.24215  | C                                                              | 0.40655  | 0.38034  | 2.71974  |
| H                                                              | -0.01388 | -1.51749 | -1.64028 | H                                                              | -0.87500 | 20.00053 | 4.18913  | H                                                              | -0.56468 | 0.33843  | 3.18957  |
| H                                                              | 1.12782  | -0.93659 | -3.24916 | H                                                              | -0.87751 | 20.23963 | 5.93316  | C                                                              | 1.54620  | 1.04940  | 3.23152  |
| N                                                              | -0.67632 | 0.41606  | -3.86463 | C                                                              | 5.30152  | 19.05826 | 7.33616  | H                                                              | 1.58777  | 1.62369  | 4.14473  |
| H                                                              | -0.71385 | -1.77733 | -3.38543 | H                                                              | 5.42578  | 18.51819 | 6.39556  | C                                                              | 5.01421  | 0.53008  | 2.36822  |
| H                                                              | -0.70119 | 0.23105  | -4.86756 | C                                                              | 6.39512  | 20.12496 | 7.42158  | C                                                              | 5.77025  | 0.34811  | 1.19579  |
| H                                                              | -0.12914 | 1.24988  | -3.66762 | H                                                              | 6.30343  | 20.85911 | 6.62208  | C                                                              | 6.94920  | -0.39193 | 1.27043  |
| H                                                              | -1.62485 | 0.59901  | -3.54699 | H                                                              | 7.38649  | 19.67175 | 7.35283  | H                                                              | 7.54640  | -0.53046 | 0.37729  |
| <b>TSS22 (C<sub>1</sub>): E<sub>tot</sub> = -3062.40989527</b> |          |          |          | H                                                              | 6.34309  | 20.66185 | 8.37082  | C                                                              | 7.36451  | -0.97099 | 2.45345  |
| C                                                              | 4.43601  | 17.88319 | 1.96556  | C                                                              | 5.45896  | 18.04389 | 8.46784  | H                                                              | 8.28378  | -1.54130 | 2.48823  |
| C                                                              | 3.56724  | 18.72950 | 1.21928  | H                                                              | 5.40783  | 18.51028 | 9.45244  | C                                                              | 6.57871  | -0.84635 | 3.58737  |
| H                                                              | 2.50028  | 18.82446 | 1.36140  | H                                                              | 6.42724  | 17.54672 | 8.40026  | H                                                              | 6.88778  | -1.33977 | 4.49998  |
| C                                                              | 4.35159  | 19.45008 | 0.28545  | H                                                              | 4.68880  | 17.27421 | 8.42299  | C                                                              | 5.39994  | -0.10801 | 3.56817  |
| H                                                              | 3.98306  | 20.18040 | -0.41941 | Fe                                                             | 4.99661  | 19.80917 | 2.20971  | C                                                              | 5.32913  | -0.83798 | -0.16809 |
| C                                                              | 5.69602  | 19.03004 | 0.42418  | N                                                              | 4.07985  | 17.11015 | 3.08696  | H                                                              | 4.40353  | 1.40333  | -0.04792 |
| H                                                              | 6.53581  | 19.38701 | -0.15297 | N                                                              | 3.68505  | 19.30971 | 4.91803  | C                                                              | 6.35150  | 1.76212  | -0.82627 |
| C                                                              | 5.75310  | 18.06834 | 1.46152  | Si                                                             | 3.00267  | 17.81940 | 4.27505  | H                                                              | 7.30446  | 1.25832  | -0.99969 |
| H                                                              | 6.64179  | 17.57054 | 1.81637  | H                                                              | 1.70926  | 18.12679 | 3.59495  | H                                                              | 6.52382  | 2.64634  | -0.21435 |
| C                                                              | 4.48911  | 20.17444 | 4.13739  | B                                                              | 2.05377  | 16.39879 | 5.60491  | H                                                              | 5.98458  | 2.10270  | -1.79585 |
| C                                                              | 4.03962  | 21.24427 | 3.30452  | N                                                              | 3.08784  | 15.67156 | 6.53733  | C                                                              | 5.03504  | -0.35534 | -1.08341 |
| H                                                              | 3.01602  | 21.55608 | 3.16702  | H                                                              | 1.57836  | 15.73462 | 4.72644  | H                                                              | 4.58489  | -0.01584 | -2.01759 |
| C                                                              | 5.16520  | 21.81749 | 2.67190  | H                                                              | 1.32236  | 17.14803 | 6.18627  | H                                                              | 4.35510  | -1.07065 | -0.62082 |
| H                                                              | 5.14761  | 22.64223 | 1.97498  | H                                                              | 3.37359  | 14.74713 | 6.26136  | H                                                              | 5.94621  | -0.89895 | -1.33876 |
| C                                                              | 6.31821  | 21.11368 | 3.09993  | H                                                              | 2.96288  | 15.78403 | 7.52849  | C                                                              | 4.52722  | -0.07182 | 4.80573  |
| H                                                              | 7.33376  | 21.30962 | 2.78950  | H                                                              | 3.37872  | 16.67183 | 5.67430  | H                                                              | 3.87403  | 0.79846  | 4.73978  |
| C                                                              | 5.90600  | 20.11252 | 4.01111  | <b>TSS23 (C<sub>1</sub>): E<sub>tot</sub> = -3062.36498066</b> |          |          |          | C                                                              | 5.31212  | 0.06691  | 6.10754  |
| H                                                              | 6.54937  | 19.40088 | 4.50748  | C                                                              | 1.76295  | 3.71870  | 1.35222  | H                                                              | 5.96560  | 0.93995  | 6.09309  |
| C                                                              | 4.37475  | 15.71482 | 3.07034  | C                                                              | 1.87662  | 3.13243  | 0.05940  | H                                                              | 5.92027  | -0.81167 | 6.32839  |
| C                                                              | 3.50461  | 14.83131 | 2.40652  | H                                                              | 2.79533  | 2.98659  | -0.49253 | H                                                              | 4.62215  | 0.19138  | 6.94285  |
| C                                                              | 3.78719  | 13.47112 | 2.43164  | C                                                              | 0.58074  | 2.74455  | -0.37085 | C                                                              | 3.63946  | -1.31871 | 4.83929  |
| H                                                              | 3.12901  | 12.77753 | 1.92382  | H                                                              | 0.34415  | 2.26670  | -1.30991 | H                                                              | 2.96390  | -1.28560 | 5.69575  |
| C                                                              | 4.89557  | 12.98172 | 3.10035  | C                                                              | -0.34239 | 3.11964  | 0.63240  | H                                                              | 4.24301  | -2.22474 | 4.92338  |
| H                                                              | 5.09499  | 11.91801 | 3.11598  | H                                                              | -1.41180 | 2.97458  | 0.60012  | H                                                              | 3.03077  | -1.40121 | 3.93959  |
| C                                                              | 5.75206  | 13.85858 | 3.73717  | C                                                              | 0.38110  | 3.71456  | 1.69518  | N                                                              | 3.91022  | 1.43319  | 2.41008  |
| H                                                              | 6.62719  | 13.47023 | 4.24464  | H                                                              | -0.03926 | 4.10680  | 2.60839  | B                                                              | 5.37036  | 3.40280  | 3.84864  |
| C                                                              | 5.51841  | 15.23146 | 3.72463  | C                                                              | 2.65095  | 5.37550  | 2.82271  | H                                                              | 5.36094  | 4.60093  | 3.99026  |
| C                                                              | 2.30603  | 15.32721 | 1.62687  | C                                                              | 2.39302  | 5.47486  | 4.20096  | H                                                              | 5.12306  | 2.86874  | 4.90600  |
| H                                                              | 2.07805  | 16.34088 | 1.95905  | C                                                              | 2.16732  | 6.73252  | 4.75067  | H                                                              | 4.33120  | 2.32005  | 3.33080  |
| C                                                              | 2.64275  | 15.39218 | 0.13535  | H                                                              | 1.95464  | 6.82122  | 5.80916  | N                                                              | 6.89714  | 2.95605  | 3.47689  |
| H                                                              | 3.50887  | 16.02623 | -0.05256 | C                                                              | 2.19815  | 7.87506  | 3.97320  | H                                                              | 7.00025  | 1.94304  | 3.49607  |
| H                                                              | 1.80309  | 15.79681 | -0.43264 | H                                                              | 2.00975  | 8.84316  | 4.41911  | H                                                              | 7.56698  | 3.35272  | 4.12745  |
| H                                                              | 2.86361  | 14.39813 | -0.25868 | C                                                              | 2.47890  | 7.77157  | 2.62403  | H                                                              | 7.13790  | 3.26294  | 2.53566  |
| C                                                              | 1.04907  | 14.49298 | 1.86427  | H                                                              | 2.51247  | 8.67019  | 2.01970  | <b>TSS24 (C<sub>1</sub>): E<sub>tot</sub> = -3062.38752135</b> |          |          |          |
| H                                                              | 1.13648  | 13.48324 | 1.45998  | C                                                              | 2.72115  | 6.53720  | 2.03158  | C                                                              | 1.60627  | 3.16498  | 1.92788  |
| H                                                              | 0.19446  | 14.95902 | 1.37200  | C                                                              | 2.32504  | 4.26733  | 5.11050  | C                                                              | 1.44808  | 2.41458  | 0.72581  |
| H                                                              | 0.81820  | 14.41263 | 2.92651  | H                                                              | 2.73006  | 3.41781  | 4.56018  | H                                                              | 2.18091  | 2.31389  | -0.06125 |
| C                                                              | 6.52684  | 16.14202 | 4.39055  | C                                                              | 3.16745  | 4.44372  | 6.37399  | C                                                              | 0.17851  | 1.78955  | 0.57524  |
| H                                                              | 6.19382  | 17.17109 | 4.24455  | H                                                              | 3.22633  | 3.50092  | 6.92111  | H                                                              | -0.22559 | 1.13803  | -0.00312 |
| C                                                              | 6.61749  | 15.88971 | 5.89379  | H                                                              | 2.73559  | 5.18198  | 7.05222  | C                                                              | -0.47124 | 2.17755  | 1.95488  |
| H                                                              | 5.65029  | 16.01237 | 6.37900  | H                                                              | 4.18270  | 4.75389  | 6.13656  | H                                                              | -1.45597 | 1.86752  | 2.27144  |
| H                                                              | 7.31839  | 16.58633 | 6.35793  | C                                                              | 0.88179  | 3.93772  | 5.49531  | C                                                              | 0.39910  | 3.02957  | 2.67290  |
| H                                                              | 6.97234  | 14.87991 | 6.10967  | H                                                              | 0.26995  | 3.70882  | 4.62408  | H                                                              | 0.19861  | 3.47218  | 3.63639  |
| C                                                              | 7.91056  | 15.99864 | 3.75330  | H                                                              | 0.41305  | 4.77227  | 6.02008  | C                                                              | 2.55221  | 5.32156  | 2.29129  |

|    |          |          |          |                                                                |          |          |          |                                                                      |          |          |          |
|----|----------|----------|----------|----------------------------------------------------------------|----------|----------|----------|----------------------------------------------------------------------|----------|----------|----------|
| C  | 2.22810  | 6.00121  | 3.47740  | H                                                              | 4.38213  | 1.60985  | 5.55933  | C                                                                    | -3.47027 | -0.17807 | -3.20650 |
| C  | 2.01453  | 7.37547  | 3.42973  | H                                                              | 6.08878  | 2.34600  | 4.57026  | H                                                                    | -3.03691 | 0.13559  | -4.15826 |
| H  | 1.76897  | 7.90953  | 4.33978  | H                                                              | 5.69148  | 3.53625  | 6.82988  | H                                                                    | -3.68601 | 0.71629  | -2.62196 |
| C  | 2.10128  | 8.07384  | 2.24222  | N                                                              | 5.00244  | 3.85188  | 7.49654  | H                                                                    | -4.42034 | -0.66889 | -3.42512 |
| H  | 1.92281  | 9.14104  | 2.22159  | H                                                              | 6.25183  | 4.33205  | 6.56150  | C                                                                    | -2.46983 | -1.10304 | 2.67692  |
| C  | 2.42031  | 7.39820  | 1.07995  | H                                                              | 6.29619  | 2.87446  | 7.29424  | H                                                                    | -1.59432 | -0.47382 | 2.50590  |
| H  | 2.48780  | 7.95135  | 0.15136  | <b>TSS25 (C<sub>i</sub>): E<sub>tot</sub> = -3062.41379694</b> |          |          |          | C                                                                    | -1.99941 | -2.33397 | 3.45337  |
| C  | 2.65888  | 6.02864  | 1.08050  | C                                                              | 1.36463  | 1.51929  | 0.39800  | H                                                                    | -1.28542 | -2.91103 | 2.86963  |
| C  | 2.10115  | 5.31287  | 4.81963  | C                                                              | 1.03806  | 1.89265  | 1.73069  | H                                                                    | -2.83517 | -2.98703 | 3.71163  |
| H  | 2.22088  | 4.23861  | 4.67080  | H                                                              | 0.81263  | 1.20775  | 2.53638  | H                                                                    | -1.51808 | -2.03378 | 4.38652  |
| C  | 3.20508  | 5.77391  | 5.77105  | C                                                              | 1.01769  | 3.30773  | 1.79657  | C                                                                    | -3.47850 | -0.31176 | 3.51357  |
| H  | 3.13475  | 5.24254  | 6.72220  | H                                                              | 0.78670  | 3.89812  | 2.67072  | H                                                                    | -3.00990 | 0.06989  | 4.42267  |
| H  | 3.12709  | 6.84176  | 5.98279  | C                                                              | 1.36321  | 3.81272  | 0.51826  | H                                                                    | -4.31732 | -0.93830 | 3.82149  |
| H  | 4.19283  | 5.58874  | 5.34992  | H                                                              | 1.44018  | 4.85514  | 0.24787  | H                                                                    | -3.89599 | 0.53229  | 2.96505  |
| C  | 0.72785  | 5.54530  | 5.45283  | C                                                              | 1.58132  | 2.71381  | -0.34589 | N                                                                    | -1.34974 | -0.21302 | 0.09007  |
| H  | -0.08374 | 5.28826  | 4.77207  | H                                                              | 1.85414  | 2.76605  | -1.38946 | B                                                                    | 0.73961  | -2.96676 | 1.05112  |
| H  | 0.58541  | 6.58767  | 5.74216  | C                                                              | 2.69548  | -0.15920 | -0.66656 | N                                                                    | 1.32016  | -4.33546 | 2.75845  |
| H  | 0.61638  | 4.94130  | 6.35496  | C                                                              | 3.75817  | -0.48947 | 0.18980  | H                                                                    | 2.15688  | -3.99650 | 3.21047  |
| C  | 2.99885  | 5.36331  | -0.23458 | C                                                              | 4.98491  | -0.82227 | -0.37038 | H                                                                    | 1.51246  | -5.24660 | 2.36894  |
| H  | 3.32355  | 4.34294  | -0.02820 | H                                                              | 5.81815  | -1.07132 | 0.27503  | H                                                                    | 0.59421  | -4.43097 | 3.45370  |
| C  | 4.15667  | 6.06257  | -0.94578 | C                                                              | 5.16172  | -0.85470 | -1.74205 | H                                                                    | -0.23665 | -3.61470 | 0.82000  |
| H  | 5.04234  | 6.10527  | -0.31212 | H                                                              | 6.12198  | -1.12706 | -2.16038 | H                                                                    | 0.67032  | -2.04893 | 1.85319  |
| H  | 3.90477  | 7.08232  | -1.23988 | C                                                              | 4.10639  | -0.53879 | -2.57481 | H                                                                    | 1.78192  | -3.17271 | 0.50352  |
| H  | 4.42103  | 5.52597  | -1.85862 | H                                                              | 4.25192  | -0.56944 | -3.64778 | <b>1, triplet, (C<sub>i</sub>): E<sub>tot</sub> = -2979.39429474</b> |          |          |          |
| C  | 1.76699  | 5.28981  | -1.13802 | C                                                              | 2.86586  | -0.17420 | -2.05944 | C                                                                    | 4.71674  | 17.79127 | 1.89223  |
| H  | 1.99554  | 4.75288  | -2.06095 | C                                                              | 3.61327  | -0.46945 | 1.69504  | C                                                                    | 3.78349  | 18.62457 | 1.24324  |
| H  | 1.42225  | 6.28802  | -1.41485 | H                                                              | 2.54950  | -0.43240 | 1.93028  | H                                                                    | 2.75968  | 18.78437 | 1.54917  |
| H  | 0.94156  | 4.77667  | -0.64571 | C                                                              | 4.15856  | -1.73956 | 2.34611  | C                                                                    | 4.47476  | 19.32872 | 0.23510  |
| Fe | 1.32519  | 1.24600  | 2.38181  | H                                                              | 5.24331  | -1.81999 | 2.25886  | H                                                                    | 4.04198  | 20.06874 | -0.42186 |
| N  | 2.75089  | 3.89796  | 2.31475  | H                                                              | 3.71533  | -2.62586 | 1.89302  | C                                                                    | 5.79890  | 18.82186 | 0.14724  |
| Si | 4.42614  | 3.39143  | 2.61833  | H                                                              | 3.92406  | -1.74226 | 3.41263  | H                                                                    | 6.53730  | 19.10535 | -0.58714 |
| C  | 3.15080  | 0.77589  | 3.10315  | C                                                              | 4.27975  | 0.77505  | 2.28369  | C                                                                    | 5.96424  | 17.88452 | 1.18535  |
| C  | 2.71752  | -0.23297 | 2.19565  | H                                                              | 4.12777  | 0.82189  | 3.36383  | H                                                                    | 6.84215  | 17.28801 | 1.38564  |
| H  | 3.23168  | -0.53066 | 1.29385  | H                                                              | 3.87547  | 1.68925  | 1.85015  | C                                                                    | 5.06111  | 20.01258 | 4.15622  |
| C  | 1.51154  | -0.78624 | 2.68954  | H                                                              | 5.35623  | 0.76574  | 2.10074  | C                                                                    | 4.71119  | 21.20726 | 3.49731  |
| H  | 0.93910  | -1.57252 | 2.22080  | C                                                              | 1.75765  | 0.18214  | -3.02837 | H                                                                    | 3.71841  | 21.62029 | 3.40219  |
| C  | 1.19086  | -0.12469 | 3.89888  | H                                                              | 0.92079  | 0.58821  | -2.45652 | C                                                                    | 5.90380  | 21.77417 | 2.96392  |
| H  | 0.32691  | -0.31364 | 4.51865  | C                                                              | 1.25782  | -1.05847 | -3.76805 | H                                                                    | 5.96078  | 22.70170 | 2.41381  |
| C  | 2.20379  | 0.83223  | 4.16257  | H                                                              | 0.90806  | -1.82191 | -3.07185 | C                                                                    | 6.99810  | 20.98814 | 3.36701  |
| H  | 2.23671  | 1.50362  | 5.00628  | H                                                              | 2.04886  | -1.50367 | -4.37414 | H                                                                    | 8.03486  | 21.16701 | 3.12604  |
| C  | 5.41918  | 0.77197  | 2.38650  | H                                                              | 0.43132  | -0.80609 | -4.43548 | C                                                                    | 6.48479  | 19.86319 | 4.04350  |
| C  | 5.86985  | 1.01049  | 1.07427  | C                                                              | 2.18350  | 1.26679  | -4.01813 | H                                                                    | 7.06419  | 19.06601 | 4.48730  |
| C  | 6.98224  | 0.31451  | 0.60375  | H                                                              | 1.33481  | 1.57607  | -4.63039 | C                                                                    | 4.71903  | 15.58561 | 2.83398  |
| H  | 7.34585  | 0.51329  | -0.39674 | H                                                              | 2.96168  | 0.91867  | -4.69877 | C                                                                    | 3.75974  | 14.79701 | 2.18116  |
| C  | 7.61571  | -0.63946 | 1.36841  | H                                                              | 2.56860  | 2.15045  | -3.50825 | C                                                                    | 4.02060  | 13.44263 | 2.01095  |
| H  | 8.48034  | -1.16604 | 0.98644  | Fe                                                             | -0.31632 | 2.60398  | 0.39557  | H                                                                    | 3.29608  | 12.81827 | 1.50266  |
| C  | 7.10378  | -0.93936 | 2.61567  | N                                                              | 1.42616  | 0.20731  | -0.11250 | C                                                                    | 5.18574  | 12.87201 | 2.49036  |
| H  | 7.56625  | -1.72584 | 3.19923  | Si                                                             | 0.18299  | -1.02879 | -0.16838 | H                                                                    | 5.36710  | 11.81362 | 2.35579  |
| C  | 6.00871  | -0.26559 | 3.14067  | C                                                              | -1.65542 | 1.16782  | 0.02342  | C                                                                    | 6.11576  | 13.65681 | 3.14564  |
| C  | 5.18337  | 1.90949  | 0.06360  | C                                                              | -1.52682 | 1.99979  | -1.12605 | H                                                                    | 7.02174  | 13.19886 | 3.52302  |
| H  | 4.32589  | 2.40353  | 0.53043  | H                                                              | -1.18706 | 1.68083  | -2.10103 | C                                                                    | 5.90815  | 15.02117 | 3.32086  |
| C  | 6.10615  | 3.00229  | -0.46826 | C                                                              | -1.87069 | 3.32263  | -0.75707 | C                                                                    | 2.46473  | 15.37318 | 1.65341  |
| H  | 6.96162  | 2.58270  | -0.99886 | H                                                              | -1.85508 | 4.18557  | -1.40589 | H                                                                    | 2.35975  | 16.38662 | 2.04138  |
| H  | 6.48176  | 3.62639  | 0.34169  | C                                                              | -2.24868 | 3.31240  | 0.60782  | C                                                                    | 2.49611  | 15.46259 | 0.12751  |
| H  | 5.57344  | 3.64430  | -1.17002 | H                                                              | -2.56764 | 4.16774  | 1.18450  | H                                                                    | 3.33858  | 16.06263 | -0.21620 |
| C  | 4.59386  | 1.08626  | -1.08444 | C                                                              | -2.12106 | 1.98964  | 1.09131  | H                                                                    | 1.58140  | 15.92193 | -0.25143 |
| H  | 4.05409  | 1.73375  | -1.77872 | H                                                              | -2.30935 | 1.66906  | 2.10328  | H                                                                    | 2.58176  | 14.47257 | -0.32470 |
| H  | 3.89667  | 0.33221  | -0.71913 | C                                                              | -2.50212 | -1.07241 | 0.10709  | C                                                                    | 1.24646  | 14.58993 | 2.14067  |
| H  | 5.36919  | 0.57193  | -1.65351 | C                                                              | -3.07412 | -1.49097 | -1.10577 | H                                                                    | 1.22088  | 13.57372 | 1.74431  |
| C  | 5.48663  | -0.76177 | 4.47535  | C                                                              | -4.20912 | -2.29383 | -1.06775 | H                                                                    | 0.32799  | 15.08338 | 1.81898  |
| H  | 4.65063  | -0.14703 | 4.78811  | H                                                              | -4.66569 | -2.61644 | -1.99555 | H                                                                    | 1.22824  | 14.52408 | 3.22867  |
| C  | 6.54067  | -0.67023 | 5.57749  | C                                                              | -4.76608 | -2.69309 | 0.13142  | C                                                                    | 6.95942  | 15.84048 | 4.04073  |
| H  | 6.91186  | 0.34877  | 5.67870  | H                                                              | -5.64992 | -3.31755 | 0.14101  | H                                                                    | 6.72676  | 16.89541 | 3.88711  |
| H  | 7.39570  | -1.32142 | 5.38782  | C                                                              | -4.18105 | -2.29623 | 1.31811  | C                                                                    | 6.92929  | 15.57145 | 5.54611  |
| H  | 6.11103  | -0.97012 | 6.53497  | H                                                              | -4.61441 | -2.62311 | 2.25570  | H                                                                    | 5.94391  | 15.77119 | 5.97101  |
| C  | 4.95098  | -2.18885 | 4.34206  | C                                                              | -3.04950 | -1.48779 | 1.33220  | H                                                                    | 7.65394  | 16.19914 | 6.06905  |
| H  | 4.52099  | -2.52040 | 5.28879  | C                                                              | -2.51733 | -1.11285 | -2.46157 | H                                                                    | 7.17158  | 14.53015 | 5.67579  |
| H  | 5.73449  | -2.89834 | 4.06968  | H                                                              | -1.57921 | -0.57450 | -2.31799 | C                                                                    | 8.36241  | 15.61269 | 3.47916  |
| H  | 4.16846  | -2.24482 | 3.58554  | C                                                              | -2.18636 | -2.35060 | -3.29461 | H                                                                    | 8.72459  | 14.60164 | 3.67005  |
| N  | 4.33984  | 1.54810  | 2.95782  | H                                                              | -3.07631 | -2.93441 | -3.53401 | H                                                                    | 9.07149  | 16.30028 | 3.94281  |
| B  | 4.92805  | 2.37074  | 4.83114  | H                                                              | -1.49088 | -3.00337 | -2.76663 | H                                                                    | 8.39621  | 15.77422 | 2.40112  |
| H  | 4.30247  | 3.39864  | 4.60554  | H                                                              | -1.72449 | -2.06160 | -4.23984 | C                                                                    | 3.49816  | 19.69722 | 5.93538  |

|                                      |          |          |          |                                      |          |          |          |                                   |          |          |          |
|--------------------------------------|----------|----------|----------|--------------------------------------|----------|----------|----------|-----------------------------------|----------|----------|----------|
| C                                    | 2.18201  | 20.15760 | 5.78265  | C                                    | 3.63447  | -0.97615 | -1.05900 | $E_{\text{tot}} = -2363.33183379$ |          |          |          |
| C                                    | 1.53844  | 20.70443 | 6.88816  | C                                    | 4.15453  | 0.06847  | -0.06996 | Si                                | 0.45026  | 0.12365  | -0.91276 |
| H                                    | 0.51873  | 21.05733 | 6.79520  | C                                    | 4.65464  | -1.21703 | -2.16978 | Si                                | 1.51941  | -2.68633 | -1.57898 |
| C                                    | 2.17928  | 20.80912 | 8.10831  | C                                    | 0.19199  | -3.91669 | 1.32293  | B                                 | -1.16455 | 0.61146  | 0.13923  |
| H                                    | 1.66558  | 21.24403 | 8.95572  | C                                    | -0.30345 | -5.28576 | 0.85776  | N                                 | -1.35685 | 1.95058  | 0.60584  |
| C                                    | 3.47656  | 20.34954 | 8.24433  | C                                    | 0.13125  | -3.79824 | 2.84614  | N                                 | -2.40712 | -0.04798 | 0.41417  |
| H                                    | 3.96811  | 20.42813 | 9.20640  | C                                    | 1.15594  | -3.11964 | -2.83746 | N                                 | 1.56332  | -1.19450 | -0.61924 |
| C                                    | 4.15356  | 19.77955 | 7.17281  | C                                    | -1.58777 | -2.65762 | -1.61444 | C                                 | -2.63231 | 2.05749  | 1.13282  |
| C                                    | 1.43162  | 20.05478 | 4.47073  | C                                    | -0.02450 | -0.31756 | -2.91311 | C                                 | -3.25769 | 0.86871  | 1.01789  |
| H                                    | 2.14763  | 19.79523 | 3.68886  | H                                    | -1.12889 | 4.38550  | -0.10032 | C                                 | -0.52902 | 3.08163  | 0.37807  |
| C                                    | 0.78668  | 21.37916 | 4.06339  | H                                    | -3.42724 | 2.98275  | -0.20721 | C                                 | 0.50293  | 3.38223  | 1.27355  |
| H                                    | -0.01880 | 21.67051 | 4.73885  | H                                    | 3.12754  | 3.58974  | 2.97484  | C                                 | 1.29218  | 4.49725  | 1.01325  |
| H                                    | 0.35422  | 21.29868 | 3.06490  | H                                    | 4.65197  | 4.15513  | 1.13871  | C                                 | 1.07269  | 5.28487  | -0.10221 |
| H                                    | 1.51190  | 22.19365 | 4.05091  | H                                    | 3.92383  | 3.92608  | -1.19218 | C                                 | 0.05337  | 4.96642  | -0.98084 |
| C                                    | 0.38794  | 18.93827 | 4.52846  | H                                    | -0.28606 | 2.17730  | 2.48619  | C                                 | -0.76429 | 3.86388  | -0.76020 |
| H                                    | 0.84423  | 17.97657 | 4.76927  | H                                    | 0.44378  | 1.72897  | 4.73647  | C                                 | 0.75920  | 2.55351  | 2.51056  |
| H                                    | -0.12792 | 18.83698 | 3.57156  | H                                    | 1.98121  | 2.53801  | 4.49536  | C                                 | 2.23116  | 2.17764  | 2.66059  |
| H                                    | -0.36496 | 19.14074 | 5.29216  | H                                    | 1.62064  | 1.04190  | 3.61896  | C                                 | 0.23896  | 3.27379  | 3.75491  |
| C                                    | 5.56371  | 19.27234 | 7.37766  | H                                    | -0.73753 | 3.91897  | 4.16060  | C                                 | -1.84600 | 3.53045  | -1.76550 |
| H                                    | 5.86570  | 18.73135 | 6.48061  | H                                    | -0.52747 | 4.64071  | 2.56747  | C                                 | -2.82891 | 4.68602  | -1.94706 |
| C                                    | 6.53820  | 20.43485 | 7.56520  | H                                    | 0.77125  | 4.73914  | 3.75553  | C                                 | -1.23426 | 3.10822  | -3.10122 |
| H                                    | 6.50758  | 21.11665 | 6.71524  | H                                    | 0.63877  | 2.46232  | -2.18032 | C                                 | -2.89230 | -1.29455 | -0.06171 |
| H                                    | 7.56164  | 20.06876 | 7.66598  | H                                    | 0.78317  | 4.39994  | -3.71308 | C                                 | -3.01993 | -2.37617 | 0.81839  |
| H                                    | 6.30308  | 21.00873 | 8.46361  | H                                    | 0.33567  | 4.92229  | -2.09192 | C                                 | -3.55413 | -3.56385 | 0.32866  |
| C                                    | 5.64889  | 18.27704 | 8.53398  | H                                    | 1.98316  | 5.15894  | -2.66608 | C                                 | -3.93583 | -3.68448 | -0.99371 |
| H                                    | 5.42335  | 18.73980 | 9.49595  | H                                    | 2.17786  | 2.27750  | -4.03483 | C                                 | -3.79288 | -2.60998 | -1.85242 |
| H                                    | 6.65606  | 17.86247 | 8.60301  | H                                    | 2.91565  | 1.49281  | -2.63880 | C                                 | -3.27710 | -1.39752 | -1.40854 |
| H                                    | 4.95473  | 17.44837 | 8.39200  | H                                    | 3.46554  | 3.08338  | -3.15726 | C                                 | -2.62717 | -2.27596 | 2.27624  |
| Fe                                   | 5.55085  | 19.73256 | 2.12669  | H                                    | -4.67990 | -1.93222 | 2.05588  | C                                 | -3.85213 | -2.00741 | 3.15302  |
| N                                    | 4.47402  | 16.98500 | 3.02082  | H                                    | -6.03512 | -2.28839 | 0.04955  | C                                 | -1.89980 | -3.52594 | 2.76672  |
| N                                    | 4.17879  | 19.12093 | 4.81093  | H                                    | -5.60058 | -0.98415 | -1.98282 | C                                 | -3.21179 | -0.22391 | -2.36281 |
| Si                                   | 3.84558  | 17.40896 | 4.60848  | H                                    | -1.62120 | -0.00729 | 2.23243  | C                                 | -4.57457 | 0.46417  | -2.45554 |
| Aldridge B-Si-N, singlet, ( $C_1$ ): |          |          |          | H                                    | -2.59607 | 1.86838  | 4.02113  | C                                 | -2.69702 | -0.60998 | -3.74635 |
| $E_{\text{tot}} = -2363.36565325$    |          |          |          | H                                    | -4.21885 | 1.08139  | 3.38908  | C                                 | 2.69740  | -0.91465 | 0.20062  |
| Si                                   | 0.56861  | -0.32634 | 0.87873  | H                                    | -3.05240 | 2.01385  | 2.44933  | C                                 | 3.77921  | -0.17419 | -0.31208 |
| Si                                   | 0.10354  | -1.88472 | -1.88542 | H                                    | -2.04939 | -1.08038 | 4.29752  | C                                 | 4.87846  | 0.05962  | 0.50653  |
| B                                    | -0.71093 | 1.08744  | 0.11518  | H                                    | -3.73184 | -1.40088 | 3.91480  | C                                 | 4.93143  | -0.42694 | 1.79964  |
| N                                    | -0.21298 | 2.43529  | 0.08135  | H                                    | -2.44713 | -2.23478 | 3.03291  | C                                 | 3.86006  | -1.14345 | 2.96732  |
| N                                    | -2.13524 | 1.25813  | -0.01148 | H                                    | -2.78602 | 1.42655  | -2.35181 | C                                 | 2.73109  | -1.38918 | 1.52216  |
| N                                    | 0.89114  | -1.54864 | -0.31454 | H                                    | -4.65012 | 2.48789  | -3.56284 | C                                 | 3.78842  | 0.40683  | -1.71064 |
| C                                    | -1.27229 | 3.31789  | -0.05621 | H                                    | -5.80796 | 1.40889  | -2.78802 | C                                 | 3.72939  | 1.93468  | -1.66489 |
| C                                    | -2.41809 | 2.61677  | -0.11232 | H                                    | -4.93751 | 2.59534  | -1.82835 | C                                 | 4.98924  | -0.07417 | -2.52493 |
| C                                    | 1.10444  | 2.88412  | 0.35794  | H                                    | -3.32798 | 0.53355  | -4.53229 | C                                 | 1.57359  | -2.13627 | 2.14968  |
| C                                    | 1.50239  | 3.02374  | 1.69733  | H                                    | -4.54228 | -0.55154 | -3.87483 | C                                 | 1.97615  | -3.54665 | 2.58022  |
| C                                    | 2.79221  | 3.47653  | 1.95189  | H                                    | -2.84204 | -0.80462 | -3.49430 | C                                 | 0.99919  | -1.35193 | 3.32925  |
| C                                    | 3.65431  | 3.79779  | 0.91905  | H                                    | 5.25038  | -2.96988 | -0.24624 | C                                 | 3.12616  | -3.61990 | -1.30045 |
| C                                    | 3.24066  | 3.66521  | -0.39361 | H                                    | 4.69404  | -4.98483 | 1.04198  | C                                 | 0.04641  | -3.73622 | -1.07322 |
| C                                    | 1.96669  | 3.19917  | -0.69986 | H                                    | 2.37673  | -5.39018 | 1.74361  | C                                 | 1.37157  | -2.26685 | -3.40953 |
| C                                    | 0.55485  | 2.76982  | 2.85076  | H                                    | 2.74150  | -0.56225 | -1.53148 | H                                 | -3.00138 | 2.97820  | 1.55501  |
| C                                    | 1.19635  | 1.97622  | 3.98584  | H                                    | 4.41272  | 0.99866  | -0.57820 | H                                 | -4.25680 | 0.60231  | 1.32155  |
| C                                    | -0.01631 | 4.09467  | 3.36047  | H                                    | 3.41408  | 0.30875  | 0.69606  | H                                 | 2.09549  | 4.75332  | 1.69238  |
| C                                    | 1.52599  | 3.09604  | -2.14300 | H                                    | 5.04585  | -0.29577 | 0.44445  | H                                 | 1.70007  | 6.14669  | -0.28901 |
| C                                    | 1.13413  | 4.47300  | -2.68229 | H                                    | 4.80215  | -0.30255 | -2.74684 | H                                 | -0.10424 | 5.58324  | -1.85735 |
| C                                    | 2.58348  | 2.45227  | -3.03733 | H                                    | 4.32900  | -1.99760 | -2.85832 | H                                 | 0.19608  | 1.62440  | 2.41237  |
| C                                    | -3.18045 | 0.30175  | 0.00254  | H                                    | 5.63213  | -1.50576 | -1.78088 | H                                 | 2.36404  | 1.49458  | 3.50023  |
| C                                    | -3.43892 | -0.41779 | 1.18374  | H                                    | -0.49036 | -3.17049 | 0.91464  | H                                 | 2.86140  | 3.04789  | 2.85183  |
| C                                    | -4.46472 | -1.35497 | 1.16741  | H                                    | -1.34620 | -5.43275 | 1.14386  | H                                 | 2.61020  | 1.67688  | 1.76943  |
| C                                    | -5.23698 | -1.55780 | 0.03617  | H                                    | -0.23578 | -5.38985 | -0.22601 | H                                 | 0.38364  | 2.65902  | 4.64496  |
| C                                    | -4.98843 | -0.82222 | -1.10434 | H                                    | 0.27252  | -6.10039 | 1.29957  | H                                 | -0.82567 | 3.49511  | 3.67189  |
| C                                    | -3.95516 | 0.10948  | -1.14974 | H                                    | -0.87874 | -3.99565 | 3.21042  | H                                 | 0.76208  | 4.21854  | 3.91480  |
| C                                    | -2.68032 | -0.14221 | 2.46825  | H                                    | 0.80020  | -4.51138 | 3.33088  | H                                 | -2.42343 | 2.68370  | -1.39260 |
| C                                    | -3.16541 | 1.15812  | 3.11351  | H                                    | 0.41992  | -2.79786 | 3.17082  | H                                 | -3.63443 | 4.39721  | -2.62420 |
| C                                    | -2.73857 | -1.28305 | 3.47767  | H                                    | 2.14767  | -2.73270 | -3.07307 | H                                 | -3.27935 | 4.97593  | -0.99755 |
| C                                    | -3.72631 | 0.87916  | -2.43501 | H                                    | 0.66679  | -3.35986 | -3.78437 | H                                 | -2.34915 | 5.57032  | -2.36958 |
| C                                    | -4.84192 | 1.90126  | -2.66301 | H                                    | 1.29507  | -4.05452 | -2.29368 | H                                 | -2.01487 | 2.81028  | -3.80426 |
| C                                    | -3.60411 | -0.04281 | -3.64811 | H                                    | -2.23675 | -2.05343 | -0.98046 | H                                 | -0.55523 | 2.26278  | -2.97688 |
| C                                    | 1.91004  | -2.48290 | 0.07027  | H                                    | -2.10426 | -2.79705 | -2.56642 | H                                 | -0.66872 | 3.92072  | -3.56085 |
| C                                    | 3.23887  | -2.23727 | -0.31992 | H                                    | -1.50155 | -3.64298 | -1.15522 | H                                 | -3.66908 | -4.41364 | 0.98867  |
| C                                    | 4.22219  | -3.14897 | 0.04157  | H                                    | -0.70299 | 0.42069  | -2.48850 | H                                 | -4.34443 | -4.61836 | -1.35703 |
| C                                    | 3.91557  | -4.28366 | 0.77114  | H                                    | -0.38526 | -0.55873 | -3.91539 | H                                 | -4.09805 | -2.71612 | -2.88541 |
| C                                    | 2.61004  | -4.50801 | 1.15950  | H                                    | 0.95184  | 0.15510  | -3.02597 | H                                 | -1.94225 | -1.43155 | 2.38476  |
| C                                    | 1.59016  | -3.62176 | 0.82331  | Aldridge B-Si-N, triplet, ( $C_1$ ): |          |          |          | H                                 | -3.56332 | -1.90917 | 4.20080  |

|                                               |          |          |          |                                               |          |          |          |                                           |          |          |          |
|-----------------------------------------------|----------|----------|----------|-----------------------------------------------|----------|----------|----------|-------------------------------------------|----------|----------|----------|
| H                                             | -4.57115 | -2.82554 | 3.08012  | H                                             | 9.60787  | -2.05461 | 14.85650 | C                                         | 12.69371 | 0.42265  | 23.54511 |
| H                                             | -4.36639 | -1.09089 | 2.86703  | H                                             | 9.54318  | 0.39776  | 14.91636 | C                                         | 14.70893 | -1.57096 | 22.30818 |
| H                                             | -1.52717 | -3.37353 | 3.78047  | H                                             | 9.08292  | -1.81312 | 20.32108 | C                                         | 11.69030 | -2.16635 | 22.24820 |
| H                                             | -2.55365 | -4.39843 | 2.80112  | H                                             | 7.47095  | -3.66945 | 20.31734 | C                                         | 15.75083 | -0.55053 | 18.45369 |
| H                                             | -1.05102 | -3.77083 | 2.12851  | H                                             | 6.87550  | -2.37926 | 19.27429 | C                                         | 13.49268 | -2.58627 | 18.18079 |
| H                                             | -2.50577 | 0.50470  | -1.96508 | H                                             | 7.59220  | -3.81907 | 18.56662 | C                                         | 13.31099 | 0.04474  | 16.64063 |
| H                                             | -4.51922 | 1.34016  | -3.10518 | H                                             | 9.95493  | -4.07471 | 20.57042 | Si                                        | 10.76987 | 1.24648  | 19.63969 |
| H                                             | -5.33076 | -0.20818 | -2.86527 | H                                             | 11.11710 | -3.07476 | 19.70548 | Si                                        | 12.86652 | 0.35107  | 20.09234 |
| H                                             | -4.91921 | 0.79877  | -1.47707 | H                                             | 10.14504 | -4.25483 | 18.83175 | Si                                        | 13.99296 | 2.41148  | 20.35362 |
| H                                             | -2.54255 | 0.28514  | -4.35015 | H                                             | 8.80646  | 2.35970  | 17.96072 | Si                                        | 12.98808 | -0.80151 | 22.13555 |
| H                                             | -3.39476 | -1.24734 | -4.29186 | H                                             | 10.71928 | 3.70031  | 17.23504 | Si                                        | 13.87521 | -0.73873 | 18.25903 |
| H                                             | -1.74313 | -1.13381 | -3.68035 | H                                             | 11.28849 | 2.20676  | 17.98748 | Si                                        | 7.79305  | 0.89241  | 20.10785 |
| H                                             | 5.71426  | 0.63300  | 0.12340  | H                                             | 11.31373 | 2.36656  | 16.24027 | N                                         | 9.25689  | 0.46551  | 19.20565 |
| H                                             | 5.79975  | -0.24137 | 2.41816  | H                                             | 8.45321  | 3.71430  | 16.01565 | H                                         | 9.27531  | -3.42727 | 16.77521 |
| H                                             | 3.89817  | -1.51251 | 3.31493  | H                                             | 7.57550  | 2.20475  | 15.77217 | H                                         | 9.40326  | -2.21889 | 14.64265 |
| H                                             | 2.89495  | 0.06577  | -2.23500 | H                                             | 9.09552  | 2.49826  | 14.93048 | H                                         | 9.34095  | 0.23681  | 14.62002 |
| H                                             | 3.67873  | 2.34865  | -2.67355 | H                                             | 6.34200  | -0.41905 | 18.27381 | H                                         | 9.29730  | -1.78964 | 20.10716 |
| H                                             | 2.85168  | 2.28194  | -1.11747 | H                                             | 5.30486  | 0.82141  | 18.96907 | H                                         | 7.51437  | -3.49139 | 20.36803 |
| H                                             | 4.61221  | 2.35469  | -1.17914 | H                                             | 6.51612  | 1.25160  | 17.77041 | H                                         | 6.91283  | -2.15819 | 19.38722 |
| H                                             | 4.93304  | 0.30555  | -3.54646 | H                                             | 8.12400  | 2.96172  | 21.35776 | H                                         | 7.39280  | -3.66218 | 18.61819 |
| H                                             | 5.02710  | -1.16299 | -2.57585 | H                                             | 6.45680  | 3.02747  | 20.79424 | H                                         | 9.92822  | -4.12695 | 20.34145 |
| H                                             | 5.93582  | 0.26772  | -2.10353 | H                                             | 7.77364  | 3.39679  | 19.68902 | H                                         | 11.07892 | -3.31854 | 19.28527 |
| H                                             | 0.78062  | -2.22444 | 1.40507  | H                                             | 7.76204  | 0.06262  | 22.36041 | H                                         | 9.85761  | -4.39162 | 18.60859 |
| H                                             | 1.12247  | -4.08312 | 2.99752  | H                                             | 6.06734  | 0.22030  | 21.91709 | H                                         | 9.00012  | 2.35146  | 17.65860 |
| H                                             | 2.35576  | -4.12962 | 1.74089  | H                                             | 6.99705  | -1.15709 | 21.34427 | H                                         | 10.35059 | 3.65594  | 16.06184 |
| H                                             | 2.75456  | -3.53033 | 3.34483  | H                                             | 14.81693 | 2.41289  | 17.80524 | H                                         | 11.28967 | 2.32436  | 16.73718 |
| H                                             | 0.16054  | -1.88521 | 3.77797  | H                                             | 14.74452 | 4.00860  | 18.53692 | H                                         | 10.65310 | 2.21255  | 15.09734 |
| H                                             | 1.74175  | -1.19280 | 4.11315  | H                                             | 13.29973 | 3.30057  | 17.82794 | H                                         | 7.83176  | 3.46774  | 15.84543 |
| H                                             | 0.63954  | -0.37386 | 3.01041  | H                                             | 12.49045 | 3.24607  | 22.05413 | H                                         | 7.02109  | 1.93576  | 16.17600 |
| H                                             | 3.99368  | -3.03447 | -1.60744 | H                                             | 13.34624 | 4.52768  | 21.19729 | H                                         | 8.05797  | 2.10002  | 14.76608 |
| H                                             | 3.12882  | -4.54232 | -1.88474 | H                                             | 11.85644 | 3.86126  | 20.53843 | H                                         | 6.29991  | -0.31128 | 18.47008 |
| H                                             | 3.28075  | -3.89219 | -0.25663 | H                                             | 15.37834 | 1.80105  | 22.01045 | H                                         | 5.37693  | 0.69832  | 19.57822 |
| H                                             | -0.89452 | -3.19171 | -1.17125 | H                                             | 15.99799 | 3.08961  | 20.98910 | H                                         | 6.24875  | 1.42540  | 18.23713 |
| H                                             | -0.03085 | -4.62824 | -1.69806 | H                                             | 16.11322 | 1.41582  | 20.46066 | H                                         | 8.67010  | 2.92318  | 21.30695 |
| H                                             | 0.12196  | -4.07102 | -0.03721 | H                                             | 11.96161 | 0.85470  | 23.45367 | H                                         | 6.93173  | 3.01212  | 21.06738 |
| H                                             | 0.47175  | -1.69021 | -3.62881 | H                                             | 13.19785 | -0.01022 | 24.36482 | H                                         | 8.02071  | 3.35860  | 19.72992 |
| H                                             | 1.32833  | -3.17700 | -4.01143 | H                                             | 13.64791 | 1.32876  | 23.31698 | H                                         | 8.58479  | -0.02826 | 22.27783 |
| H                                             | 2.22565  | -1.68403 | -3.75895 | H                                             | 15.06830 | -2.23800 | 21.24605 | H                                         | 6.85590  | 0.27942  | 22.32904 |
| Aldridge N-Si-Si, singlet, (C <sub>1</sub> ): |          |          |          | H                                             | 15.17861 | -1.89448 | 22.96745 | H                                         | 7.46549  | -1.16373 | 21.53138 |
| E <sub>tot</sub> = -2734.09531327             |          |          |          | H                                             | 15.68991 | -0.68481 | 21.79395 | H                                         | 14.94153 | 2.58849  | 18.03059 |
| C                                             | 9.29868  | -0.21524 | 18.24175 | H                                             | 12.18734 | -3.06109 | 21.70587 | H                                         | 14.77888 | 4.17648  | 18.77060 |
| C                                             | 9.28195  | -1.61852 | 18.21008 | H                                             | 12.20059 | -2.57753 | 23.39625 | H                                         | 13.35986 | 3.35343  | 18.12780 |
| C                                             | 9.40394  | -2.25696 | 16.97869 | H                                             | 10.97168 | -1.94277 | 22.30970 | H                                         | 12.72327 | 3.20716  | 22.37014 |
| C                                             | 9.51269  | -1.53977 | 15.80340 | H                                             | 15.84024 | 0.36122  | 18.28968 | H                                         | 13.51385 | 4.54824  | 21.54495 |
| C                                             | 9.47959  | -0.15652 | 15.84382 | H                                             | 15.87300 | -1.11261 | 19.24777 | H                                         | 12.02568 | 3.86429  | 20.89729 |
| C                                             | 9.36444  | 0.52619  | 17.04797 | H                                             | 16.03250 | -1.19507 | 17.49712 | H                                         | 15.50744 | 1.73970  | 22.23537 |
| C                                             | 9.05309  | -2.46405 | 19.44576 | H                                             | 12.23095 | -2.88567 | 17.71682 | H                                         | 16.20218 | 3.06772  | 21.31637 |
| C                                             | 7.66939  | -3.11590 | 19.39772 | H                                             | 13.42995 | -3.21610 | 18.96839 | H                                         | 16.28311 | 1.42490  | 20.68877 |
| C                                             | 10.12942 | -3.52590 | 19.64384 | H                                             | 13.90999 | -3.17734 | 17.27641 | H                                         | 11.73763 | 0.93494  | 23.42562 |
| C                                             | 9.32889  | 2.03992  | 17.05816 | H                                             | 12.10018 | -0.20599 | 16.25262 | H                                         | 12.67786 | -0.08751 | 24.51041 |
| C                                             | 10.74115 | 2.61329  | 17.13585 | H                                             | 13.39666 | 0.97626  | 16.40983 | H                                         | 13.47124 | 1.18642  | 23.59184 |
| C                                             | 8.57060  | 2.63887  | 15.87640 | H                                             | 13.71044 | -0.57593 | 15.63845 | H                                         | 14.89961 | -2.29904 | 21.51751 |
| C                                             | 6.32159  | 0.61047  | 18.63084 | Aldridge N-Si-Si, triplet, (C <sub>1</sub> ): |          |          |          | H                                         | 14.81601 | -2.09089 | 23.26253 |
| C                                             | 7.47319  | 2.74482  | 20.51051 | E <sub>tot</sub> = -2734.05826754             |          |          |          | H                                         | 15.49596 | -0.81742 | 22.25424 |
| C                                             | 7.04824  | -0.08767 | 21.54877 | C                                             | 9.23263  | -0.25347 | 17.97497 | H                                         | 11.85483 | -2.94176 | 21.50032 |
| C                                             | 14.19331 | 3.07402  | 18.40825 | C                                             | 9.22484  | -1.66205 | 17.98929 | H                                         | 11.71372 | -2.64452 | 23.22972 |
| C                                             | 12.77746 | 3.60424  | 21.06524 | C                                             | 9.28150  | -2.34430 | 16.77840 | H                                         | 10.68358 | -1.77370 | 22.09583 |
| C                                             | 15.47223 | 2.13183  | 20.97641 | C                                             | 9.34544  | -1.66981 | 15.57328 | H                                         | 16.06757 | 0.49274  | 18.42532 |
| C                                             | 12.98204 | 0.47071  | 23.40785 | C                                             | 9.31507  | -0.28819 | 15.56748 | H                                         | 16.10270 | -0.97454 | 19.39579 |
| C                                             | 14.94492 | -1.45424 | 21.99540 | C                                             | 9.24199  | 0.44085  | 16.74976 | H                                         | 16.27212 | -1.07047 | 17.64681 |
| C                                             | 12.02567 | -2.21944 | 22.37909 | C                                             | 9.07968  | -2.45664 | 19.27124 | H                                         | 12.47855 | -2.75827 | 17.82058 |
| C                                             | 15.51777 | -0.68038 | 18.31209 | C                                             | 7.64323  | -2.96505 | 19.42010 | H                                         | 13.59825 | -3.08433 | 19.14591 |
| C                                             | 13.26213 | -2.70549 | 18.01884 | C                                             | 10.04268 | -3.63621 | 19.37391 | H                                         | 14.17316 | -3.07955 | 17.48315 |
| C                                             | 13.16518 | -0.08824 | 16.44988 | C                                             | 9.14969  | 1.95078  | 16.65484 | H                                         | 12.24093 | -0.10841 | 16.48837 |
| Si                                            | 10.43937 | 0.91273  | 20.59652 | C                                             | 10.43517 | 2.56863  | 16.10590 | H                                         | 13.49692 | 1.11856  | 16.61267 |
| Si                                            | 12.63875 | 0.26337  | 19.92411 | C                                             | 7.94678  | 2.38303  | 15.81389 | H                                         | 13.83304 | -0.40410 | 15.79266 |
| Si                                            | 13.80043 | 2.33235  | 20.10759 | C                                             | 6.29844  | 0.64299  | 18.99560 | Power S-Si-S, singlet, (C <sub>1</sub> ): |          |          |          |
| Si                                            | 13.18118 | -0.76997 | 21.99170 | C                                             | 7.87039  | 2.71141  | 20.59578 | E <sub>tot</sub> = -2939.91879950         |          |          |          |
| Si                                            | 13.64096 | -0.85736 | 18.10440 | C                                             | 7.66108  | -0.10516 | 21.69969 | S                                         | 10.62351 | 3.07078  | 11.08831 |
| Si                                            | 7.52664  | 0.92460  | 20.03783 | C                                             | 14.29859 | 3.20158  | 18.66341 | Si                                        | 9.17352  | 2.59284  | 12.62938 |
| N                                             | 9.18407  | 0.47313  | 19.48249 | C                                             | 12.96740 | 3.61524  | 21.38919 | C                                         | 11.94210 | 3.77123  | 12.04851 |
| H                                             | 9.39686  | -3.33972 | 16.93778 | C                                             | 15.64889 | 2.13050  | 21.22630 | S                                         | 7.63575  | 2.53032  | 11.09788 |

|   |          |          |          |                                           |          |          |          |   |          |          |          |
|---|----------|----------|----------|-------------------------------------------|----------|----------|----------|---|----------|----------|----------|
| C | 11.73743 | 4.74980  | 13.03242 | H                                         | 11.72543 | -1.51067 | 14.81367 | H | 13.61384 | 3.13406  | 7.26761  |
| C | 12.85085 | 5.32812  | 13.63668 | H                                         | 11.03624 | -1.08640 | 16.37781 | H | 14.15958 | 4.13158  | 8.61242  |
| H | 12.69383 | 6.09620  | 14.38406 | H                                         | 11.82787 | 0.14189  | 15.40198 | H | 12.45679 | 3.76229  | 8.43702  |
| C | 14.13672 | 4.94885  | 13.29434 | C                                         | 8.13758  | -0.99124 | 11.36875 | C | 14.44541 | -1.56565 | 8.62482  |
| H | 14.98713 | 5.41685  | 13.77223 | H                                         | 8.87417  | -1.73425 | 11.06665 | H | 14.15659 | -2.42692 | 9.22647  |
| C | 14.32549 | 3.96443  | 12.33910 | H                                         | 8.17417  | -0.17598 | 10.64256 | H | 15.52306 | -1.63047 | 8.46126  |
| H | 15.32488 | 3.64589  | 12.06978 | H                                         | 7.14864  | -1.44384 | 11.29276 | H | 13.96519 | -1.66516 | 7.65131  |
| C | 13.23979 | 3.36852  | 11.70979 | C                                         | 4.91445  | 3.21778  | 10.20371 | C | 13.32136 | 1.00609  | 12.78497 |
| C | 10.38969 | 5.18994  | 13.48457 | C                                         | 4.83288  | 4.55424  | 10.59794 | H | 13.62609 | 0.06754  | 13.24737 |
| C | 9.60399  | 6.02836  | 12.68526 | C                                         | 4.73802  | 5.53877  | 9.62153  | H | 12.25892 | 1.14761  | 13.00293 |
| C | 8.35481  | 6.42793  | 13.15331 | H                                         | 4.66940  | 6.57720  | 9.92752  | H | 13.85799 | 1.81491  | 13.28115 |
| H | 7.74179  | 7.06431  | 12.52481 | C                                         | 4.73173  | 5.22760  | 8.26903  | C | 6.31252  | 1.72470  | 12.18475 |
| C | 7.88118  | 6.04532  | 14.39876 | C                                         | 4.82413  | 3.89072  | 7.90174  | C | 6.41041  | 0.38906  | 12.59856 |
| C | 8.69302  | 5.24120  | 15.19178 | H                                         | 4.82729  | 3.62813  | 6.84921  | C | 5.48480  | -0.52822 | 12.11351 |
| H | 8.33904  | 4.93015  | 16.16881 | C                                         | 4.91879  | 2.87903  | 8.84767  | H | 5.55774  | -1.55996 | 12.43440 |
| C | 9.93670  | 4.80762  | 14.76061 | C                                         | 4.88236  | 4.92862  | 12.04931 | C | 4.47946  | -0.14060 | 11.24326 |
| C | 10.07694 | 6.48949  | 11.34040 | H                                         | 4.68052  | 5.99038  | 12.18904 | H | 3.76510  | -0.86744 | 10.87999 |
| H | 9.49191  | 7.33888  | 10.99037 | H                                         | 5.87138  | 4.72302  | 12.46672 | C | 4.39714  | 1.18027  | 10.83829 |
| H | 9.97974  | 5.69227  | 10.59970 | H                                         | 4.15859  | 4.36968  | 12.64343 | H | 3.62233  | 1.49437  | 10.14986 |
| H | 11.12595 | 6.78484  | 11.35913 | C                                         | 4.65984  | 6.30473  | 7.22616  | C | 5.30819  | 2.12548  | 11.29853 |
| C | 6.53207  | 6.48038  | 14.89057 | H                                         | 4.27171  | 7.23660  | 7.63611  | C | 7.48903  | -0.07949 | 13.50538 |
| H | 6.05879  | 7.17821  | 14.20145 | H                                         | 4.01801  | 6.01595  | 6.39360  | C | 7.43542  | 0.19753  | 14.87439 |
| H | 6.60284  | 6.97037  | 15.86258 | H                                         | 5.64795  | 6.51723  | 6.81311  | C | 8.48549  | -0.21853 | 15.68714 |
| H | 5.85941  | 5.62852  | 15.00667 | C                                         | 5.05393  | 1.44691  | 8.41847  | H | 8.44564  | 0.00453  | 16.74767 |
| C | 10.74647 | 3.89182  | 15.63051 | H                                         | 5.98623  | 1.01421  | 8.78684  | C | 9.57806  | -0.90646 | 15.17975 |
| H | 10.19578 | 3.62854  | 16.53277 | H                                         | 5.05545  | 1.36024  | 7.33268  | C | 9.59434  | -1.20326 | 13.82211 |
| H | 11.69336 | 4.33699  | 15.93609 | H                                         | 4.24348  | 0.82552  | 8.80155  | H | 10.43623 | -1.74587 | 13.40560 |
| H | 10.98316 | 2.96303  | 15.10550 | Power S-Si-S, triplet, (C <sub>i</sub> ): |          |          |          | C | 8.56706  | -0.80787 | 12.97471 |
| C | 13.47349 | 2.31076  | 10.69394 | E <sub>tot</sub> = -2939.85872870         |          |          |          | C | 6.27873  | 0.94379  | 15.46949 |
| C | 13.72090 | 2.66250  | 9.36496  | S                                         | 10.54671 | 2.73265  | 10.90587 | H | 6.27218  | 0.85487  | 16.55522 |
| C | 13.95824 | 1.65713  | 8.43658  | Si                                        | 9.32361  | 2.18591  | 12.56855 | H | 5.32329  | 0.57555  | 15.09591 |
| H | 14.14464 | 1.92937  | 7.40325  | C                                         | 11.82419 | 3.82182  | 11.49343 | H | 6.33413  | 2.00645  | 15.22317 |
| C | 13.95352 | 0.31537  | 8.79586  | S                                         | 7.36951  | 3.01347  | 12.82050 | C | 10.72198 | -1.31473 | 16.06093 |
| C | 13.69221 | -0.00895 | 10.12035 | C                                         | 11.55020 | 5.02506  | 12.15241 | H | 11.63148 | -0.77054 | 15.79937 |
| H | 13.67258 | -1.05213 | 10.41729 | C                                         | 12.61770 | 5.85070  | 12.49187 | H | 10.94322 | -2.37813 | 15.96198 |
| C | 13.44879 | 0.96822  | 11.07747 | H                                         | 12.40886 | 6.78717  | 12.99413 | H | 10.51241 | -1.11663 | 17.11120 |
| C | 13.69754 | 4.10166  | 8.93839  | C                                         | 13.92313 | 5.49777  | 12.19406 | C | 8.63179  | -1.15785 | 11.51559 |
| H | 13.89523 | 4.19907  | 7.87165  | H                                         | 14.73827 | 6.15697  | 12.46201 | H | 9.64316  | -1.44252 | 11.22872 |
| H | 14.43994 | 4.69792  | 9.47045  | C                                         | 14.18021 | 4.29449  | 11.55906 | H | 8.33095  | -0.32344 | 10.88186 |
| H | 12.72487 | 4.55579  | 9.13802  | H                                         | 15.19768 | 3.99917  | 11.33485 | H | 7.97172  | -1.99435 | 11.27783 |
| C | 14.24545 | -0.75237 | 7.78213  | C                                         | 13.14061 | 3.44204  | 11.20581 | C | 5.19097  | 3.53448  | 10.83937 |
| H | 13.80538 | -1.70779 | 8.06651  | C                                         | 10.18012 | 5.44276  | 12.54201 | C | 4.30946  | 4.40217  | 11.48923 |
| H | 15.32069 | -0.90961 | 7.67449  | C                                         | 9.29877  | 5.98838  | 11.60413 | C | 4.17503  | 5.70300  | 11.02074 |
| H | 13.85777 | -0.48857 | 6.79825  | C                                         | 8.04825  | 6.42052  | 12.02909 | H | 3.48951  | 6.37538  | 11.52572 |
| C | 13.13013 | 0.58234  | 12.49165 | H                                         | 7.35739  | 6.82398  | 11.29804 | C | 4.89735  | 6.16251  | 9.92717  |
| H | 13.24862 | -0.49039 | 12.64336 | C                                         | 7.65117  | 6.32519  | 13.35420 | C | 5.77202  | 5.28382  | 9.30250  |
| H | 12.09752 | 0.83874  | 12.74307 | C                                         | 8.54448  | 5.78595  | 14.27033 | H | 6.34747  | 5.62453  | 8.44824  |
| H | 13.77054 | 1.09438  | 13.21082 | H                                         | 8.24910  | 5.69528  | 15.31004 | C | 5.93641  | 3.97622  | 9.74342  |
| C | 6.20064  | 1.74978  | 11.79350 | C                                         | 9.80443  | 5.34415  | 13.88918 | C | 3.53027  | 3.94515  | 12.68886 |
| C | 6.23117  | 0.73677  | 12.76131 | C                                         | 9.67237  | 6.10027  | 10.15556 | H | 2.93899  | 4.75907  | 13.10695 |
| C | 5.03728  | 0.12584  | 13.13303 | H                                         | 8.99401  | 6.77048  | 9.62885  | H | 4.19075  | 3.57457  | 13.47558 |
| H | 5.06988  | -0.66454 | 13.87301 | H                                         | 9.61858  | 5.12574  | 9.66545  | H | 2.84727  | 3.12996  | 12.44576 |
| C | 3.82935  | 0.50571  | 12.57549 | H                                         | 10.68783 | 6.47372  | 10.02103 | C | 4.76760  | 7.58412  | 9.46308  |
| H | 2.91223  | 0.01653  | 12.87556 | C                                         | 6.27304  | 6.72941  | 13.78159 | H | 3.75160  | 7.95828  | 9.58818  |
| C | 3.80678  | 1.51852  | 11.63189 | H                                         | 5.83157  | 7.44955  | 13.09380 | H | 5.03360  | 7.69065  | 8.41185  |
| H | 2.87020  | 1.83510  | 11.18984 | H                                         | 6.27145  | 7.16785  | 14.77981 | H | 5.42593  | 8.24584  | 10.03157 |
| C | 4.97962  | 2.14566  | 11.23025 | H                                         | 5.61352  | 5.85917  | 13.80129 | C | 6.92269  | 3.07182  | 9.06745  |
| C | 7.48372  | 0.30853  | 13.43156 | C                                         | 10.73677 | 4.77330  | 14.92063 | H | 7.79630  | 2.91054  | 9.70340  |
| C | 7.72995  | 0.71839  | 14.75001 | H                                         | 10.20374 | 4.55630  | 15.84553 | H | 7.27776  | 3.50321  | 8.13225  |
| C | 8.91556  | 0.34027  | 15.36164 | H                                         | 11.54650 | 5.46432  | 15.16189 | H | 6.49987  | 2.09155  | 8.84694  |
| H | 9.11314  | 0.67262  | 16.37501 | H                                         | 11.20168 | 3.84646  | 14.58122 |   |          |          |          |
| C | 9.87663  | -0.40836 | 14.69348 | C                                         | 13.44954 | 2.14971  | 10.54131 |   |          |          |          |
| C | 9.60334  | -0.82136 | 13.39609 | C                                         | 13.63099 | 2.10739  | 9.15640  |   |          |          |          |
| H | 10.33282 | -1.42313 | 12.86541 | C                                         | 13.94210 | 0.89528  | 8.55469  |   |          |          |          |
| C | 8.40939  | -0.49712 | 12.75787 | H                                         | 14.07769 | 0.86195  | 7.47892  |   |          |          |          |
| C | 6.77717  | 1.63154  | 15.46475 | C                                         | 14.07615 | -0.27359 | 9.29357  |   |          |          |          |
| H | 7.16157  | 1.90214  | 16.44737 | C                                         | 13.88029 | -0.20782 | 10.66608 |   |          |          |          |
| H | 5.79306  | 1.18383  | 15.60289 | H                                         | 13.97196 | -1.11172 | 11.25886 |   |          |          |          |
| H | 6.62847  | 2.55581  | 14.90111 | C                                         | 13.56632 | 0.98615  | 11.30476 |   |          |          |          |
| C | 11.18217 | -0.73746 | 15.35523 | C                                         | 13.45981 | 3.34585  | 8.32492  |   |          |          |          |

## References

- [S1] R. S. Ghadwal, H. W. Roesky, S. Merkel, J. Henn, D. Stalke, *Angew. Chem. Int. Ed.* **2009**, *48*, 5683.
- [S2] J. Oetzel, N. Weyer, C. Bruhn, M. Leibold, B. Gerke, R. Pöttgen, M. Maier, R. F. Winter, M. C. Holthausen, U. Siemeling, *Chem. Eur. J.* **2017**, *23*, 1187.
- [S3] B. A. Correia Bicho, C. Bruhn, R. Guthardt, N. Weyer, U. Siemeling, *Z. Anorg. Allg. Chem.* **2018**, *644*, 1329.
- [S4] H. Arp, C. Marschner, J. Baumgartner, *Dalton Trans.* **2010**, *39*, 9270.
- [S5] G. M. Sheldrick, *Acta Crystallogr., Sect. A: Found. Crystallogr.* **2008**, *64*, 112.
- [S6] J. Oetzel, C. Bruhn, U. Siemeling, *Z. Anorg. Allg. Chem.* **2018**, *644*, 935.
- [S7] F. Neese, *Wiley Interdiscip. Rev. Comput. Mol. Sci.* **2018**, *8*, e1327.
- [S8] S. Grimme, J. G. Brandenburg, C. Bannwarth, A. Hansen, *J. Chem. Phys.* **2015**, *143*, 054107.
- [S9] K. Fukui, *Acc. Chem. Res.* **1981**, *14*, 363.
- [S10] S. Ten-no, *Chem. Phys. Lett.* **2004**, *398*, 56.
- [S11] T. B. Adler, G. Knizia, H.-J. Werner, *J. Chem. Phys.* **2007**, *127*, 221106.
- [S12] H.-J. Werner, P. J. Knowles, G. Knizia, F. R. Manby, M. Schütz, *Wiley Interdiscip. Rev. Comput. Mol. Sci.* **2012**, *2*, 242.
- [S13] K. A. Peterson, T. B. Adler, H.-J. Werner, *J. Chem. Phys.* **2008**, *128*, 084102.
- [S14] F. Weigend, *J. Comput. Chem.* **2008**, *29*, 167.
- [S15] F. Weigend, A. Köhn, C. Hättig, *J. Chem. Phys.* **2002**, *116*, 3175.
- [S16] K. E. Yousaf, K. A. Peterson, *Chem. Phys. Lett.* **2009**, *476*, 303.
- [S17] C. Riplinger, F. Neese, *J. Chem. Phys.* **2013**, *138*, 034106.
- [S18] M. J. Frisch, G. W. Trucks, H. B. Schlegel, G. E. Scuseria, M. A. Robb, J. R. Cheeseman, G. Scalmani, V. Barone, B. Mennucci, G. A. Petersson, H. Nakatsuji, M. Caricato, X. Li, H. P. Hratchian, A. F. Izmaylov, J. Bloino, G. Zheng, J. L. Sonnenberg, M. Hada, M. Ehara, K. Toyota, R. Fukuda, J. Hasegawa, M. Ishida, T. Nakajima, Y. Honda, O. Kitao, H. Nakai, T. Vreven, J. A. Montgomery, Jr., J. E. Peralta, F. Ogliaro, M. Bearpark, J. J. Heyd, E. Brothers, K. N. Kudin, V. N. Staroverov, R. Kobayashi, J. Normand, K. Raghavachari, A. Rendell, J. C. Burant, S. S. Iyengar, J. Tomasi, M. Cossi, N. Rega, J. M. Millam, M. Klene, J. E. Knox, J. B. Cross, V. Bakken, C. Adamo, J. Jaramillo, R. Gomperts, R. E. Stratmann, O. Yazyev, A. J. Austin, R. Cammi, C. Pomelli, J. W. Ochterski, R. L. Martin, K. Morokuma, V. G. Zakrzewski, G. A. Voth, P. Salvador, J. J. Dannenberg, S. Dapprich, A. D. Daniels, O. Farkas, J. B. Foresman, J. V. Ortiz, J. Cioslowski, D. J. Fox, Gaussian, Inc., Wallingford CT, **2009**.
- [S19] Y. Zhao, D. G. Truhlar, *J. Chem. Phys.* **2006**, *125*, 194101.
- [S20] W. J. Hehre, R. Ditchfield, J. A. Pople, *J. Chem. Phys.* **1972**, *56*, 2257.
- [S21] M. M. Francl, W. J. Pietro, W. J. Hehre, J. S. Binkley, M. S. Gordon, D. J. DeFrees, J. A. Pople, *J. Chem. Phys.* **1982**, *77*, 3654.
- [S22] G. te Velde, F. M. Bickelhaupt, E. J. Baerends, C. Fonseca Guerra, S. J. A. van Gisbergen, J. G. Snijders, T. Ziegler, *J. Comput. Chem.* **2001**, *22*, 931.
- [S23] C. Fonseca Guerra, J. G. Snijders, G. te Velde, E. J. Baerends, *Theor. Chem. Acc.* **1998**, *99*, 391.
- [S24] ADF2013, SCM, Theoretical Chemistry, Vrije Universiteit, Amsterdam, The Netherlands, <http://www.scm.com>.
- [S25] A. D. Becke, *Phys. Rev. A* **1988**, *38*, 3098.
- [S26] C. Lee, W. Yang, R. G. Parr, *Phys. Rev. B* **1988**, *37*, 785.

- [S27] E. Van Lenthe, E. J. Baerends, *J. Comput. Chem.* **2003**, *24*, 1142.
- [S28] C. Y. Legault, Université de Sherbrooke, <http://www.cylview.org>, **2009**.
- [S29] G. A. Andrienko, **2015**.
- [S30] A. V. Protchenko, K. H. Birj Kumar, D. Dange, A. D. Schwarz, D. Vidovic, C. Jones, N. Kaltsoyannis, P. Mountford, S. Aldridge, *J. Am. Chem. Soc.* **2012**, *134*, 6500.
- [S31] A. V. Protchenko, A. D. Schwarz, M. P. Blake, C. Jones, N. Kaltsoyannis, P. Mountford, S. Aldridge, *Angew. Chem. Int. Ed.* **2013**, *52*, 568.
- [S32] B. D. Reken, T. M. Brown, J. C. Fettinger, H. M. Tuononen, P. P. Power, *J. Am. Chem. Soc.* **2012**, *134*, 6504.
- [S33] A. D. Becke, *J. Chem. Phys.* **1993**, *98*, 5648.
- [S34] F. Weigend, R. Ahlrichs, *Phys. Chem. Chem. Phys.* **2005**, *7*, 3297.
- [S35] J.-D. Chai, M. Head-Gordon, *Phys. Chem. Chem. Phys.* **2008**, *10*, 6615.
- [S36] E. Wigner, *Phys. Rev.* **1932**, *40*, 749.
